# Supplementary material for: Long non-coding RNA Neat1 and paraspeckle components are translational regulators in hypoxia
Source: eLife. 2022 Dec 22;11:e69162. doi: 10.7554/eLife.69162 (PMC9799981; doi:10.7554/eLife.69162)
Supplement: Supplementary file 7. — p54nrb-HA transduced HL-1 cells were subjected to normoxia or hypoxia, then nucleus and cytoplasm fractionation was performed and extracts were immunoprecipitated using anti-HA antibody. Enriched interacting proteins were identified by using a label-free quantitative mass spectrometry approach. The dataset list of proteins identified by MS/MS is presented in alphabetical order. An unpaired bilateral student t-test with equal variance was used. Enrichment significance thresholds correspond to an absolute log2-transformed fold-change (FC) greater than 1 and a -log10-transformed (p-value) greater than 1.3. [file elife-69162-supp7.xlsx]

## Sheet: Legend
Column name	Type of value	Name of the experiment in Sup Table SX	Fraction type	Treatment type	Biological replicate	Technical replicate (MS)	Raw MS file	Dat file name in Mascot searches
Accession	Identifier of the reference protein group
Gene_name	Name of the gene associated to the reference protein group
Description	Name of the protein exclusive of the identifier that appears in the Accession column.
Protein_set_score	Displays the protein score
#sameset_protein_matches	Number of proteins identified within the group with exactly the same set of peptides
#subset_protein_matches	Number of proteins identified within the group with commun set of peptides
Coverage	Percentage of the sequence that is covered by the identified peptides of the best protein sequence contained in the group.
MW	Molecular weight of the leading protein sequence contained in the protein group.
#observable_peptides	The total number of theoritically observable peptides
#sequences	The total number of distinct peptide sequences associated with the protein group (Modified forms or different charges are counted as one peptide sequence)
#specific_sequences	The total number of unique distinct peptide sequences associated with the protein group i.e. these distinct peptide sequences are not shared with another protein group (Modified forms or different charges are counted as one peptide sequence)
#peptides	The total number of peptides associated with the protein group.
#specific_peptides	The total number of peptides associated with the protein group i.e. these peptides are not shared with another protein group.
#peptide_matches	The total number of identified peptide spectrum matches associated with the protein group, including those redundantly identified.
#specific_peptide_matches	The total number of identified unique peptide spectrum matches associated with the protein group, including those redundantly identified.
LOG2 (Norm_abundance)_CytoNorm-R1	Mean of Log2(Norm_abundance) values from MS replicates_missing values imputed
LOG2 (Norm_abundance)_CytoNorm-R2	Mean of Log2(Norm_abundance) values from MS replicates_missing values imputed
LOG2 (Norm_abundance)_CytoNorm-R3	Mean of Log2(Norm_abundance) values from MS replicates_missing values imputed
LOG2 (Norm_abundance)_CytoNorm-R4	Mean of Log2(Norm_abundance) values from MS replicates_missing values imputed
LOG2 (Norm_abundance)_NucleusNorm-R1	Mean of Log2(Norm_abundance) values from MS replicates_missing values imputed
LOG2 (Norm_abundance)_Nucleus Norm-R2	Mean of Log2(Norm_abundance) values from MS replicates_missing values imputed
LOG2 (Norm_abundance)_NucleusNorm-R3	Mean of Log2(Norm_abundance) values from MS replicates_missing values imputed
LOG2 (Norm_abundance)_NucleusNorm-R4	Mean of Log2(Norm_abundance) values from MS replicates_missing values imputed
LOG2 (Norm_abundance)_CytoHypox-R1	Mean of Log2(Norm_abundance) values from MS replicates_missing values imputed
LOG2 (Norm_abundance)_CytoHypox-R2	Mean of Log2(Norm_abundance) values from MS replicates_missing values imputed
LOG2 (Norm_abundance)_CytoHypox-R3	Mean of Log2(Norm_abundance) values from MS replicates_missing values imputed
LOG2 (Norm_abundance)_CytoHypox-R4	Mean of Log2(Norm_abundance) values from MS replicates_missing values imputed
LOG2 (Norm_abundance)_NucleusHypox-R1	Mean of Log2(Norm_abundance) values from MS replicates_missing values imputed
LOG2 (Norm_abundance)_NucleusHypox-R3	Mean of Log2(Norm_abundance) values from MS replicates_missing values imputed
LOG2 (Norm_abundance)_NucleusHypox-R4	Mean of Log2(Norm_abundance) values from MS replicates_missing values imputed
LOG2 (Fold Change CytoHypox/CytoNorm)	Difference between the mean of Log2 (Norm_abundance) values in the Cytoplasm Hypoxia condition and the the mean of Log2 (Norm_abundance) values in the Cytoplasm Normoxia condition
Student t-test p-value	p-value of the Student t-test performed on the Log2 (Norm_abundance) values of the Cytoplasm Hypoxia condition versus the Cytoplasm Normoxia condition
Total averaged psm_count	Total averaged peptide spectrum matches (psm) counts for the protein identified in all the samples from the Cytoplasm Hypoxia condition and the Cytoplasm Normoxia condition
Quantified in n≥2 for at least one condition	Displays the presence of the quantified protein in at least two biological replicates in one of the two conditions based on Norm_abundance ("+" if it is considered as present)
Significantly enriched	Displays the selection of the significantly enriched protein based on the absolute Log2(FC)> 1, p-value <0.05, total averaged psm_count>4 and quantified in n≥2 for at least one condition ("+" if it is significantly enriched)
LOG2 (Fold Change NucleusHypox/NucleusNorm)	Difference between the mean of Log2 (Norm_abundance) values in the Nucleus Hypoxia condition and the the mean of Log2 (Norm_abundance) values in the Nucleus Normoxia condition
Student t-test p-value	p-value of the Student t-test performed on the Log2 (Norm_abundance) values of the Nucleus Hypoxia condition versus the Nucleus Normoxia condition
Total averaged psm_count	Total averaged peptide spectrum matches (psm) counts for the protein identified in all the samples from the Nucleus Hypoxia condition and the Nucleus Normoxia condition
Quantified in n≥2 for at least one condition	Displays the presence of the quantified protein in at least two biological replicates in one of the two conditions based on Norm_abundance ("+" if it is considered as present)
Significantly enriched	Displays the selection of the significantly enriched protein based on the absolute Log2(FC)> 1, p-value <0.05, total averaged psm_count>4 and quantified in n≥2 for at least one condition ("+" if it is significantly enriched)
LOG2 (Fold Change NucleusNorm/CytoNorm)	Difference between the mean of Log2 (Norm_abundance) values in the Nucleus Normoxia condition and the the mean of Log2 (Norm_abundance) values in the Cytoplasm Normoxia condition
Student t-test p-value	p-value of the Student t-test performed on the Log2 (Norm_abundance) values of the Nucleus Normoxia condition versus the Cytoplasm Normoxia condition
Total averaged psm_count	Total averaged peptide spectrum matches (psm) counts for the protein identified in all the samples from the Nucleus Normoxia condition and the Cytoplasm Normoxia condition
Quantified in n≥2 for at least one condition	Displays the presence of the quantified protein in at least two biological replicates in one of the two conditions based on Norm_abundance ("+" if it is considered as present)
Significantly enriched	Displays the selection of the significantly enriched protein based on the absolute Log2(FC)> 1, p-value <0.05, total averaged psm_count>4 and quantified in n≥2 for at least one condition ("+" if it is significantly enriched)
LOG2 (Fold Change NucleusHypox/CytoHypox)	Difference between the mean of Log2 (Norm_abundance) values in the Nucleus Hypoxia condition and the the mean of Log2 (Norm_abundance) values in the Cytoplasm Hypoxia condition
Student t-test p-value	p-value of the Student t-test performed on the Log2 (Norm_abundance) values of the Nucleus Hypoxia condition versus the Cytoplasm Hypoxia condition
Total averaged psm_count	Total averaged peptide spectrum matches (psm) counts for the protein identified in all the samples from the Nucleus Hypoxia condition and the Cytoplasm Hypoxia condition
Quantified in n≥2 for at least one condition	Displays the presence of the quantified protein in at least two biological replicates in one of the two conditions based on Norm_abundance ("+" if it is considered as present)
Significantly enriched	Displays the selection of the significantly enriched protein based on the absolute Log2(FC)> 1, p-value <0.05, total averaged psm_count>4 and quantified in n≥2 for at least one condition ("+" if it is significantly enriched)
Mean psm_count_CytoNorm-R1	Mean of psm_count values from MS replicates
Mean psm_count_CytoNorm-R2	Mean of psm_count values from MS replicates
Mean psm_count_CytoNorm-R3	Mean of psm_count values from MS replicates
Mean psm_count_CytoNorm-R4	Mean of psm_count values from MS replicates
Mean psm_count_NucleusNorm-R1	Mean of psm_count values from MS replicates
Mean psm_count_NucleusNorm-R2	Mean of psm_count values from MS replicates
Mean psm_count_NucleusNorm-R3	Mean of psm_count values from MS replicates
Mean psm_count_NucleusNorm-R4	Mean of psm_count values from MS replicates
Mean psm_count_CytoHypox-R1	Mean of psm_count values from MS replicates
Mean psm_count_CytoHypox-R2	Mean of psm_count values from MS replicates
Mean psm_count_CytoHypox-R3	Mean of psm_count values from MS replicates
Mean psm_count_CytoHypox-R4	Mean of psm_count values from MS replicates
Mean psm_count_NucleusHypox-R1	Mean of psm_count values from MS replicates
Mean psm_count_NucleusHypox-R3	Mean of psm_count values from MS replicates
Mean psm_count_NucleusHypox-R4	Mean of psm_count values from MS replicates
psm_count_CytoNorm-R1-Inj1	The total number of identified peptide spectrum matches (psm) associated with the protein group in the file.	CytoNorm-R1-Inj1	Cytoplasm	Normoxia	1	inj1	OVCCF180622_05	93203
psm_count_CytoNorm-R1-Inj2	The total number of identified peptide spectrum matches (psm) associated with the protein group in the file.	CytoNorm-R1-Inj2	Cytoplasm	Normoxia	1	inj2	OVCCF180622_20	93217
psm_count_CytoNorm-R1-Inj3	The total number of identified peptide spectrum matches (psm) associated with the protein group in the file.	CytoNorm-R1-Inj3	Cytoplasm	Normoxia	1	inj3	OVCCF180622_35	93223
psm_count_CytoNorm-R2- Inj1	The total number of identified peptide spectrum matches (psm) associated with the protein group in the file.	CytoNorm-R2- Inj1	Cytoplasm	Normoxia	2	inj1	OVCCF190129_09	93228
psm_count_CytoNorm-R2-Inj2	The total number of identified peptide spectrum matches (psm) associated with the protein group in the file.	CytoNorm-R2-Inj2	Cytoplasm	Normoxia	2	inj2	OVCCF190129_45	93239
psm_count_CytoNorm-R3-Inj1	The total number of identified peptide spectrum matches (psm) associated with the protein group in the file.	CytoNorm-R3-Inj1	Cytoplasm	Normoxia	3	inj1	OVCCF190129_30	93233
psm_count_CytoNorm-R3-Inj2	The total number of identified peptide spectrum matches (psm) associated with the protein group in the file.	CytoNorm-R3-Inj2	Cytoplasm	Normoxia	3	inj2	OVCCF190129_54	93242
psm_count_CytoNorm-R4-Inj1	The total number of identified peptide spectrum matches (psm) associated with the protein group in the file.	CytoNorm-R4-Inj1	Cytoplasm	Normoxia	4	inj1	OECCF190321_05	93803
psm_count_CytoNorm-R4-Inj2	The total number of identified peptide spectrum matches (psm) associated with the protein group in the file.	CytoNorm-R4-Inj2	Cytoplasm	Normoxia	4	inj2	OECCF190321_20	93812
psm_count_NucleusNorm-R1-Inj1	The total number of identified peptide spectrum matches (psm) associated with the protein group in the file.	NucleusNorm-R1-Inj1	Nucleus	Normoxia	1	inj1	OVCCF180622_08	93204
psm_count_NucleusNorm-R1-Inj2	The total number of identified peptide spectrum matches (psm) associated with the protein group in the file.	NucleusNorm-R1-Inj2	Nucleus	Normoxia	1	inj2	OVCCF180622_23	93219
psm_count_NucleusNorm-R1-Inj3	The total number of identified peptide spectrum matches (psm) associated with the protein group in the file.	NucleusNorm-R1-Inj3	Nucleus	Normoxia	1	inj3	OVCCF180622_38	93224
psm_count_NucleusNorm-R2-Inj1	The total number of identified peptide spectrum matches (psm) associated with the protein group in the file.	NucleusNorm-R2-Inj1	Nucleus	Normoxia	2	inj1	OVCCF190129_12	93229
psm_count_NucleusNorm-R2-Inj2	The total number of identified peptide spectrum matches (psm) associated with the protein group in the file.	NucleusNorm-R2-Inj2	Nucleus	Normoxia	2	inj2	OVCCF190129_48	93240
psm_count_NucleusNorm-R3-Inj1	The total number of identified peptide spectrum matches (psm) associated with the protein group in the file.	NucleusNorm-R3-Inj1	Nucleus	Normoxia	3	inj1	OVCCF190129_33	93235
psm_count_NucleusNorm-R3-Inj2	The total number of identified peptide spectrum matches (psm) associated with the protein group in the file.	NucleusNorm-R3-Inj2	Nucleus	Normoxia	3	inj2	OVCCF190129_57	93243
psm_count_NucleusNorm-R4-Inj1	The total number of identified peptide spectrum matches (psm) associated with the protein group in the file.	NucleusNorm-R4-Inj1	Nucleus	Normoxia	4	inj1	OECCF190321_08	93804
psm_count_NucleusNorm-R4-Inj2	The total number of identified peptide spectrum matches (psm) associated with the protein group in the file.	NucleusNorm-R4-Inj2	Nucleus	Normoxia	4	inj2	OECCF190321_23	93813
psm_count_CytoHypox-R1-Inj1	The total number of identified peptide spectrum matches (psm) associated with the protein group in the file.	CytoHypox-R1-Inj1	Cytoplasm	Hypoxia	1	inj1	OVCCF180622_11	93209
psm_count_CytoHypox-R1-Inj2	The total number of identified peptide spectrum matches (psm) associated with the protein group in the file.	CytoHypox-R1-Inj2	Cytoplasm	Hypoxia	1	inj2	OVCCF180622_26	93220
psm_count_CytoHypox-R1-Inj3	The total number of identified peptide spectrum matches (psm) associated with the protein group in the file.	CytoHypox-R1-Inj3	Cytoplasm	Hypoxia	1	inj3	OVCCF180622_41	93225
psm_count_CytoHypox-R2-Inj1	The total number of identified peptide spectrum matches (psm) associated with the protein group in the file.	CytoHypox-R2-Inj1	Cytoplasm	Hypoxia	2	inj1	OVCCF190129_15	93230
psm_count_CytoHypox-R2- Inj2	The total number of identified peptide spectrum matches (psm) associated with the protein group in the file.	CytoHypox-R2- Inj2	Cytoplasm	Hypoxia	2	inj2	OVCCF190129_51	93241
psm_count_CytoHypox-R3-Inj1	The total number of identified peptide spectrum matches (psm) associated with the protein group in the file.	CytoHypox-R3-Inj1	Cytoplasm	Hypoxia	3	inj1	OVCCF190129_36	93236
psm_count_CytoHypox-R3-Inj2	The total number of identified peptide spectrum matches (psm) associated with the protein group in the file.	CytoHypox-R3-Inj2	Cytoplasm	Hypoxia	3	inj2	OVCCF190129_60	93244
psm_count_CytoHypox-R4-Inj1	The total number of identified peptide spectrum matches (psm) associated with the protein group in the file.	CytoHypox-R4-Inj1	Cytoplasm	Hypoxia	4	inj1	OECCF190321_11	93805
psm_count_CytoHypox-R4-Inj2	The total number of identified peptide spectrum matches (psm) associated with the protein group in the file.	CytoHypox-R4-Inj2	Cytoplasm	Hypoxia	4	inj2	OECCF190321_26	93814
psm_count_NucleusHypox-R1-Inj1	The total number of identified peptide spectrum matches (psm) associated with the protein group in the file.	NucleusHypox-R1-Inj1	Nucleus	Hypoxia	1	inj1	OVCCF180622_14	93211
psm_count_NucleusHypox-R1-Inj2	The total number of identified peptide spectrum matches (psm) associated with the protein group in the file.	NucleusHypox-R1-Inj2	Nucleus	Hypoxia	1	inj2	OVCCF180622_29	93221
psm_count_NucleusHypox-R1-Inj3	The total number of identified peptide spectrum matches (psm) associated with the protein group in the file.	NucleusHypox-R1-Inj3	Nucleus	Hypoxia	1	inj3	OVCCF180622_44	93226
psm_count_NucleusHypox-R3-Inj1	The total number of identified peptide spectrum matches (psm) associated with the protein group in the file.	NucleusHypox-R3-Inj1	Nucleus	Hypoxia	3	inj1	OVCCF190129_39	93237
psm_count_NucleusHypox-R3-Inj2	The total number of identified peptide spectrum matches (psm) associated with the protein group in the file.	NucleusHypox-R3-Inj2	Nucleus	Hypoxia	3	inj2	OVCCF190129_63	93245
psm_count_NucleusHypox-R4-Inj1	The total number of identified peptide spectrum matches (psm) associated with the protein group in the file.	NucleusHypox-R4-Inj1	Nucleus	Hypoxia	4	inj1	OECCF190321_14	93806
psm_count_NucleusHypox-R4-Inj2	The total number of identified peptide spectrum matches (psm) associated with the protein group in the file.	NucleusHypox-R4-Inj2	Nucleus	Hypoxia	4	inj2	OECCF190321_29	93815
Norm_abundance_CytoNorm-R1-Inj1	Protein intensity value calculated from the XICs of the peptidic isotopic clusters associated with the identified protein sequence in the file, normalized across all samples	CytoNorm-R1-Inj1	Cytoplasm	Normoxia	1	inj1	OVCCF180622_05	93203
Norm_abundance_CytoNorm-R1-Inj2	Protein intensity value calculated from the XICs of the peptidic isotopic clusters associated with the identified protein sequence in the file, normalized across all samples	CytoNorm-R1-Inj2	Cytoplasm	Normoxia	1	inj2	OVCCF180622_20	93217
Norm_abundance_CytoNorm-R1-Inj3	Protein intensity value calculated from the XICs of the peptidic isotopic clusters associated with the identified protein sequence in the file, normalized across all samples	CytoNorm-R1-Inj3	Cytoplasm	Normoxia	1	inj3	OVCCF180622_35	93223
Norm_abundance_CytoNorm-R2- Inj1	Protein intensity value calculated from the XICs of the peptidic isotopic clusters associated with the identified protein sequence in the file, normalized across all samples	CytoNorm-R2- Inj1	Cytoplasm	Normoxia	2	inj1	OVCCF190129_09	93228
Norm_abundance_CytoNorm-R2-Inj2	Protein intensity value calculated from the XICs of the peptidic isotopic clusters associated with the identified protein sequence in the file, normalized across all samples	CytoNorm-R2-Inj2	Cytoplasm	Normoxia	2	inj2	OVCCF190129_45	93239
Norm_abundance_CytoNorm-R3-Inj1	Protein intensity value calculated from the XICs of the peptidic isotopic clusters associated with the identified protein sequence in the file, normalized across all samples	CytoNorm-R3-Inj1	Cytoplasm	Normoxia	3	inj1	OVCCF190129_30	93233
Norm_abundance_CytoNorm-R3-Inj2	Protein intensity value calculated from the XICs of the peptidic isotopic clusters associated with the identified protein sequence in the file, normalized across all samples	CytoNorm-R3-Inj2	Cytoplasm	Normoxia	3	inj2	OVCCF190129_54	93242
Norm_abundance_CytoNorm-R4-Inj1	Protein intensity value calculated from the XICs of the peptidic isotopic clusters associated with the identified protein sequence in the file, normalized across all samples	CytoNorm-R4-Inj1	Cytoplasm	Normoxia	4	inj1	OECCF190321_05	93803
Norm_abundance_CytoNorm-R4-Inj2	Protein intensity value calculated from the XICs of the peptidic isotopic clusters associated with the identified protein sequence in the file, normalized across all samples	CytoNorm-R4-Inj2	Cytoplasm	Normoxia	4	inj2	OECCF190321_20	93812
Norm_abundance_NucleusNorm-R1-Inj1	Protein intensity value calculated from the XICs of the peptidic isotopic clusters associated with the identified protein sequence in the file, normalized across all samples	NucleusNorm-R1-Inj1	Nucleus	Normoxia	1	inj1	OVCCF180622_08	93204
Norm_abundance_NucleusNorm-R1-Inj2	Protein intensity value calculated from the XICs of the peptidic isotopic clusters associated with the identified protein sequence in the file, normalized across all samples	NucleusNorm-R1-Inj2	Nucleus	Normoxia	1	inj2	OVCCF180622_23	93219
Norm_abundance_NucleusNorm-R1-Inj3	Protein intensity value calculated from the XICs of the peptidic isotopic clusters associated with the identified protein sequence in the file, normalized across all samples	NucleusNorm-R1-Inj3	Nucleus	Normoxia	1	inj3	OVCCF180622_38	93224
Norm_abundance_NucleusNorm-R2-Inj1	Protein intensity value calculated from the XICs of the peptidic isotopic clusters associated with the identified protein sequence in the file, normalized across all samples	NucleusNorm-R2-Inj1	Nucleus	Normoxia	2	inj1	OVCCF190129_12	93229
Norm_abundance_NucleusNorm-R2-Inj2	Protein intensity value calculated from the XICs of the peptidic isotopic clusters associated with the identified protein sequence in the file, normalized across all samples	NucleusNorm-R2-Inj2	Nucleus	Normoxia	2	inj2	OVCCF190129_48	93240
Norm_abundance_NucleusNorm-R3-Inj1	Protein intensity value calculated from the XICs of the peptidic isotopic clusters associated with the identified protein sequence in the file, normalized across all samples	NucleusNorm-R3-Inj1	Nucleus	Normoxia	3	inj1	OVCCF190129_33	93235
Norm_abundance_NucleusNorm-R3-Inj2	Protein intensity value calculated from the XICs of the peptidic isotopic clusters associated with the identified protein sequence in the file, normalized across all samples	NucleusNorm-R3-Inj2	Nucleus	Normoxia	3	inj2	OVCCF190129_57	93243
Norm_abundance_NucleusNorm-R4-Inj1	Protein intensity value calculated from the XICs of the peptidic isotopic clusters associated with the identified protein sequence in the file, normalized across all samples	NucleusNorm-R4-Inj1	Nucleus	Normoxia	4	inj1	OECCF190321_08	93804
Norm_abundance_NucleusNorm-R4-Inj2	Protein intensity value calculated from the XICs of the peptidic isotopic clusters associated with the identified protein sequence in the file, normalized across all samples	NucleusNorm-R4-Inj2	Nucleus	Normoxia	4	inj2	OECCF190321_23	93813
Norm_abundance_CytoHypox-R1-Inj1	Protein intensity value calculated from the XICs of the peptidic isotopic clusters associated with the identified protein sequence in the file, normalized across all samples	CytoHypox-R1-Inj1	Cytoplasm	Hypoxia	1	inj1	OVCCF180622_11	93209
Norm_abundance_CytoHypox-R1-Inj2	Protein intensity value calculated from the XICs of the peptidic isotopic clusters associated with the identified protein sequence in the file, normalized across all samples	CytoHypox-R1-Inj2	Cytoplasm	Hypoxia	1	inj2	OVCCF180622_26	93220
Norm_abundance_CytoHypox-R1-Inj3	Protein intensity value calculated from the XICs of the peptidic isotopic clusters associated with the identified protein sequence in the file, normalized across all samples	CytoHypox-R1-Inj3	Cytoplasm	Hypoxia	1	inj3	OVCCF180622_41	93225
Norm_abundance_CytoHypox-R2-Inj1	Protein intensity value calculated from the XICs of the peptidic isotopic clusters associated with the identified protein sequence in the file, normalized across all samples	CytoHypox-R2-Inj1	Cytoplasm	Hypoxia	2	inj1	OVCCF190129_15	93230
Norm_abundance_CytoHypox-R2- Inj2	Protein intensity value calculated from the XICs of the peptidic isotopic clusters associated with the identified protein sequence in the file, normalized across all samples	CytoHypox-R2- Inj2	Cytoplasm	Hypoxia	2	inj2	OVCCF190129_51	93241
Norm_abundance_CytoHypox-R3-Inj1	Protein intensity value calculated from the XICs of the peptidic isotopic clusters associated with the identified protein sequence in the file, normalized across all samples	CytoHypox-R3-Inj1	Cytoplasm	Hypoxia	3	inj1	OVCCF190129_36	93236
Norm_abundance_CytoHypox-R3-Inj2	Protein intensity value calculated from the XICs of the peptidic isotopic clusters associated with the identified protein sequence in the file, normalized across all samples	CytoHypox-R3-Inj2	Cytoplasm	Hypoxia	3	inj2	OVCCF190129_60	93244
Norm_abundance_CytoHypox-R4-Inj1	Protein intensity value calculated from the XICs of the peptidic isotopic clusters associated with the identified protein sequence in the file, normalized across all samples	CytoHypox-R4-Inj1	Cytoplasm	Hypoxia	4	inj1	OECCF190321_11	93805
Norm_abundance_CytoHypox-R4-Inj2	Protein intensity value calculated from the XICs of the peptidic isotopic clusters associated with the identified protein sequence in the file, normalized across all samples	CytoHypox-R4-Inj2	Cytoplasm	Hypoxia	4	inj2	OECCF190321_26	93814
Norm_abundance_NucleusHypox-R1-Inj1	Protein intensity value calculated from the XICs of the peptidic isotopic clusters associated with the identified protein sequence in the file, normalized across all samples	NucleusHypox-R1-Inj1	Nucleus	Hypoxia	1	inj1	OVCCF180622_14	93211
Norm_abundance_NucleusHypox-R1-Inj2	Protein intensity value calculated from the XICs of the peptidic isotopic clusters associated with the identified protein sequence in the file, normalized across all samples	NucleusHypox-R1-Inj2	Nucleus	Hypoxia	1	inj2	OVCCF180622_29	93221
Norm_abundance_NucleusHypox-R1-Inj3	Protein intensity value calculated from the XICs of the peptidic isotopic clusters associated with the identified protein sequence in the file, normalized across all samples	NucleusHypox-R1-Inj3	Nucleus	Hypoxia	1	inj3	OVCCF180622_44	93226
Norm_abundance_NucleusHypox-R3-Inj1	Protein intensity value calculated from the XICs of the peptidic isotopic clusters associated with the identified protein sequence in the file, normalized across all samples	NucleusHypox-R3-Inj1	Nucleus	Hypoxia	3	inj1	OVCCF190129_39	93237
Norm_abundance_NucleusHypox-R3-Inj2	Protein intensity value calculated from the XICs of the peptidic isotopic clusters associated with the identified protein sequence in the file, normalized across all samples	NucleusHypox-R3-Inj2	Nucleus	Hypoxia	3	inj2	OVCCF190129_63	93245
Norm_abundance_NucleusHypox-R4-Inj1	Protein intensity value calculated from the XICs of the peptidic isotopic clusters associated with the identified protein sequence in the file, normalized across all samples	NucleusHypox-R4-Inj1	Nucleus	Hypoxia	4	inj1	OECCF190321_14	93806
Norm_abundance_NucleusHypox-R4-Inj2	Protein intensity value calculated from the XICs of the peptidic isotopic clusters associated with the identified protein sequence in the file, normalized across all samples	NucleusHypox-R4-Inj2	Nucleus	Hypoxia	4	inj2	OECCF190321_29	93815

## Sheet: Dataset list of proteins
accession	gene_name	description	protein_set_score	#sameset_protein_matches	#subset_protein_matches	coverage	MW	#observable_peptides	#sequences	#specific_sequences	#peptides	#specific_peptides	#peptide_matches	#specific_peptide_matches	LOG2 (Norm_abundance)_CytoNorm-R1	LOG2 (Norm_abundance)_CytoNorm-R2	LOG2 (Norm_abundance)_CytoNorm-R3	LOG2 (Norm_abundance)_CytoNorm-R4	LOG2 (Norm_abundance)_NucleusNorm-R1	LOG2 (Norm_abundance)_Nucleus Norm-R2	LOG2 (Norm_abundance)_NucleusNorm-R3	LOG2 (Norm_abundance)_NucleusNorm-R4	LOG2 (Norm_abundance)_CytoHypox-R1	LOG2 (Norm_abundance)_CytoHypox-R2	LOG2 (Norm_abundance)_CytoHypox-R3	LOG2 (Norm_abundance)_CytoHypox-R4	LOG2 (Norm_abundance)_NucleusHypox-R1	LOG2 (Norm_abundance)_NucleusHypox-R3	LOG2 (Norm_abundance)_NucleusHypox-R4	LOG2 (Fold Change CytoHypox/CytoNorm)	Student t-test p-value	Total averaged psm_count	Quantified in n≥2 for at least one condition	Significantly enriched	LOG2 (Fold Change NucleusHypox/NucleusNorm)	Student t-test p-value	Total averaged psm_count	Quantified in n≥2 for at least one condition	Significantly enriched	LOG2 (Fold Change NucleusNorm/CytoNorm)	Student t-test p-value	Total averaged psm_count	Quantified in n≥2 for at least one condition	Significantly enriched	LOG2 (Fold Change NucleusHypox/CytoHypox)	Student t-test p-value	Total averaged psm_count	Quantified in n≥2 for at least one condition	Significantly enriched
sp|Q3UHJ0|AAK1_MOUSE	Aak1	AP2-associated protein kinase 1 OS=Mus musculus GN=Aak1 PE=1 SV=2	48.89	1	0	1.56	103346	45	1	1	1	1	4	4	12.6775	9.99847	10.4455	10.6507	10.7898	10.8819	10.9778	11.9882	9.13483	10.785	10.5808	10.6	10.8596	11.0634	11.3406	-0.667863	0.381107	2			-0.0715748	0.846031	2			0.216432	0.752738	2			0.81272	0.142838	2
sp|Q8BGQ7|SYAC_MOUSE	Aars	Alanine--tRNA ligase, cytoplasmic OS=Mus musculus GN=Aars PE=1 SV=1	10.525	1	0	1.14	106909	59	1	1	1	1	2	2	10.9543	9.99847	9.91162	10.6507	10.7898	10.8819	10.9778	11.9882	9.13483	12.6103	10.5808	10.2934	11.2219	11.0634	11.3406	0.276091	0.730826	4.5	+		0.0491906	0.88958	0			0.780686	0.0835113	2.5	+		0.553786	0.547064	2
sp|Q61102|ABCB7_MOUSE	Abcb7	ATP-binding cassette sub-family B member 7, mitochondrial OS=Mus musculus GN=Abcb7 PE=1 SV=3	74.52	1	0	8.38	82581	41	4	4	4	4	11	11	10.5982	14.0553	10.4455	10.6507	10.7898	10.8819	10.9778	11.9882	10.7348	14.5274	10.5808	10.2934	10.8596	11.0634	11.3406	0.0967247	0.944363	3	+		-0.0715748	0.846031	0			-0.277949	0.772079	1			-0.446248	0.723315	2	+
sp|P61222|ABCE1_MOUSE	Abce1	ATP-binding cassette sub-family E member 1 OS=Mus musculus GN=Abce1 PE=1 SV=1	281.915	1	0	24.71	67314	36	13	13	13	13	50	50	17.8582	15.7447	13.249	13.7301	10.7898	16.2309	16.5626	14.7182	17.109	16.1873	15.6057	15.0056	10.8596	15.1687	12.7661	0.831397	0.495015	9	+		-1.6439	0.422402	2	+		-0.570121	0.747642	5.5	+		-3.04542	0.0480699	5.5	+	+
sp|Q6P542|ABCF1_MOUSE	Abcf1	ATP-binding cassette sub-family F member 1 OS=Mus musculus GN=Abcf1 PE=1 SV=1	112.315	1	0	4.66	94945	43	3	3	3	3	6	6	13.2302	10.1987	10.4455	13.4815	11.174	10.8819	10.9778	11.9882	9.9302	10.3741	10.5808	14.4195	10.8596	11.0634	11.3406	-0.512809	0.719403	114.667	+		-0.167617	0.622606	80.6667			-0.583476	0.546831	96.6667	+		-0.238284	0.854722	98.6667	+
sp|Q8K268|ABCF3_MOUSE	Abcf3	ATP-binding cassette sub-family F member 3 OS=Mus musculus GN=Abcf3 PE=1 SV=1	11.405	1	0	1.27	79865	40	1	1	1	1	4	4	12.4939	9.99847	10.4455	10.6507	10.7948	10.8819	10.2931	11.9882	9.67186	10.785	10.5808	10.2934	11.452	11.0634	11.3406	-0.564359	0.383555	2.5			0.295809	0.525473	0	+		0.0923805	0.892514	1.5	+		0.952549	0.0254171	1
sp|Q4JIM5|ABL2_MOUSE	Abl2	Abelson tyrosine-protein kinase 2 OS=Mus musculus GN=Abl2 PE=1 SV=1	57.768	1	0	1.18	128196	56	1	1	1	1	7	7	10.5982	9.99847	10.4455	10.6507	10.7898	10.8819	10.9778	11.9882	10.3034	10.785	10.5808	10.2934	10.8596	11.0634	11.3406	0.0674641	0.734323	3.5			-0.0715748	0.846031	0			0.736253	0.0585291	1			0.597214	0.0221103	2.5
sp|Q8K4G5|ABLM1_MOUSE	Ablim1	Actin-binding LIM protein 1 OS=Mus musculus GN=Ablim1 PE=1 SV=1	38.202	1	0	1.63	96805	62	1	1	1	1	20	20	11.7325	10.5479	10.4455	10.6507	12.9153	10.8819	10.9778	11.9882	10.0626	11.7844	10.5808	10.2934	12.2198	11.0634	11.3406	-0.163816	0.747509	8.83333	+		-0.149548	0.823738	0			0.846699	0.1843	1	+		0.860966	0.17102	7.83333	+
sp|Q8BWT1|THIM_MOUSE	Acaa2	3-ketoacyl-CoA thiolase, mitochondrial OS=Mus musculus GN=Acaa2 PE=1 SV=3	42.433	1	0	6.8	41830	25	2	2	2	2	4	4	10.5982	13.0845	10.4455	10.6507	10.7898	10.8819	10.9778	11.9882	10.8933	12.2531	10.5808	10.2934	10.8596	11.0634	11.3406	-0.189555	0.812803	7.66667	+		-0.0715748	0.846031	0			-0.0352608	0.960919	2.33333			0.0827192	0.881231	5.33333	+
sp|Q8JZN5|ACAD9_MOUSE	Acad9	Acyl-CoA dehydrogenase family member 9, mitochondrial OS=Mus musculus GN=Acad9 PE=1 SV=2	134.716	1	0	16.32	68722	38	6	6	6	6	15	15	10.5982	15.0713	11.4887	12.4104	10.7898	10.8819	10.9778	12.5481	11.5992	15.1259	12.8067	11.4587	10.8596	11.8119	11.3406	0.355464	0.791542	19.1667	+		0.0379857	0.947177	0			-1.09274	0.339449	10.5	+		-1.41022	0.229249	8.66667	+
sp|P51174|ACADL_MOUSE	Acadl	Long-chain specific acyl-CoA dehydrogenase, mitochondrial OS=Mus musculus GN=Acadl PE=1 SV=2	261.674	1	0	28.14	47908	24	9	9	9	9	29	29	12.4952	16.8074	13.5614	13.1915	14.0356	14.1463	14.5849	16.1574	14.5281	16.8103	14.5172	12.7368	13.593	15.1526	16.6799	0.634247	0.635241	226.833	+		0.410757	0.681765	180.833	+		0.717197	0.529551	228	+		0.493707	0.706376	179.667	+
sp|P45952|ACADM_MOUSE	Acadm	Medium-chain specific acyl-CoA dehydrogenase, mitochondrial OS=Mus musculus GN=Acadm PE=1 SV=1	157.881	1	0	24.23	46481	22	7	7	7	7	18	18	11.7528	15.2542	11.144	10.6507	14.3152	14.0269	13.5985	13.7896	9.13483	15.4553	10.3597	11.4164	10.8596	14.279	14.6459	-0.608857	0.735651	106.833	+		-0.671015	0.54167	38.8333	+		1.73215	0.151406	45.6667	+		1.66999	0.421683	100	+
sp|P50544|ACADV_MOUSE	Acadvl	Very long-chain specific acyl-CoA dehydrogenase, mitochondrial OS=Mus musculus GN=Acadvl PE=1 SV=3	56.492	1	0	8.23	70875	45	4	4	4	4	9	9	10.5982	16.1906	10.4455	11.9656	10.7898	10.8819	10.9778	11.9882	10.4295	16.2136	10.5808	12.8283	10.8596	11.0634	13.5072	0.213085	0.914492	2	+		0.650629	0.444657	0			-1.14052	0.436952	1	+		-0.702978	0.704283	1	+
sp|Q8QZT1|THIL_MOUSE	Acat1	Acetyl-CoA acetyltransferase, mitochondrial OS=Mus musculus GN=Acat1 PE=1 SV=1	348.336	1	0	40.09	44816	24	12	12	12	12	40	40	11.153	17.3083	10.4455	10.6507	11.3578	10.8819	10.9778	11.9882	11.5743	16.837	10.5808	10.2934	11.6331	11.0634	11.823	-0.0679528	0.976861	7	+		0.205073	0.586487	0	+		-1.08791	0.537805	3	+		-0.814887	0.673136	4	+
sp|Q9JIX8|ACINU_MOUSE	Acin1	Apoptotic chromatin condensation inducer in the nucleus OS=Mus musculus GN=Acin1 PE=1 SV=3	146.086	1	0	8.59	150719	84	8	8	8	8	37	37	12.8253	10.0301	12.1418	10.6507	15.535	15.4307	15.6887	12.9802	10.8899	11.7065	10.8426	10.2934	16.2268	15.4337	12.4905	-0.478861	0.524729	4	+		-0.191628	0.881264	1	+		3.49668	0.00867686	1.5	+		3.78391	0.0134139	3.5	+
sp|Q91V92|ACLY_MOUSE	Acly	ATP-citrate synthase OS=Mus musculus GN=Acly PE=1 SV=1	240.923	1	0	9.81	119728	64	8	8	8	8	44	44	14.9747	14.945	14.8709	15.5166	17.2557	10.8819	17.6059	17.0388	13.5041	16.7879	16.3702	15.4488	13.5257	18.5769	16.2138	0.450925	0.567246	19	+		0.409916	0.863277	11	+		0.618747	0.714935	11.5	+		0.577738	0.71518	18.5	+
sp|Q99KI0|ACON_MOUSE	Aco2	Aconitate hydratase, mitochondrial OS=Mus musculus GN=Aco2 PE=1 SV=1	473.499	1	0	26.28	85464	44	13	13	13	13	36	36	12.1197	17.5475	13.6851	12.7199	13.0075	15.0526	12.4507	11.9882	18.8778	18.7364	14.3	13.8187	11.6676	17.0319	11.9673	2.4152	0.236757	24.6667	+		0.430825	0.805685	0	+		-0.893255	0.54546	10	+		-2.87763	0.244551	14.6667	+
sp|Q32MW3|ACO10_MOUSE	Acot10	Acyl-coenzyme A thioesterase 10, mitochondrial OS=Mus musculus GN=Acot10 PE=2 SV=1	18.666	2	0	4.33	50552	30	2	2	2	2	4	4	10.5982	12.6094	10.4455	10.6507	12.3167	10.8819	11.0864	11.9882	9.13483	13.2268	10.5808	10.2934	11.7518	11.1197	11.3406	-0.266957	0.799453	1			-0.164296	0.723062	0	+		0.492386	0.456659	0	+		0.595047	0.590056	1	+
sp|Q9CQR4|ACO13_MOUSE	Acot13	Acyl-coenzyme A thioesterase 13 OS=Mus musculus GN=Acot13 PE=1 SV=1	18.699	1	0	7.14	15183	10	1	1	1	1	2	2	10.5982	11.923	10.4455	10.6507	10.7898	10.8803	10.9778	11.9882	10.4931	12.3565	10.5808	10.2934	11.1524	11.0634	11.3406	0.0266376	0.96538	9.66667	+		0.0264017	0.940624	0			0.254711	0.585105	4			0.254475	0.674389	5.66667	+
sp|P41216|ACSL1_MOUSE	Acsl1	Long-chain-fatty-acid--CoA ligase 1 OS=Mus musculus GN=Acsl1 PE=1 SV=2	23.228	1	0	1.57	77951	40	1	1	1	1	2	2	10.5982	12.0812	10.4455	10.6507	10.7898	10.8819	10.9778	11.9882	9.68505	11.7171	11.2476	10.2934	10.8596	11.0634	14.7325	-0.208073	0.739204	12	+		1.05905	0.381206	0			0.215574	0.664369	4			1.48269	0.26602	8	+
sp|Q9QUJ7|ACSL4_MOUSE	Acsl4	Long-chain-fatty-acid--CoA ligase 4 OS=Mus musculus GN=Acsl4 PE=1 SV=2	52.6	1	0	3.66	79077	42	2	1	2	1	3	2	10.5982	12.1202	10.4455	10.6507	10.7898	10.8819	10.9778	11.9882	9.13483	12.094	10.5808	10.2934	10.8596	11.0634	11.3406	-0.42785	0.576072	1.5			-0.0715748	0.846031	0			0.205819	0.683361	0			0.562094	0.476091	1.5
sp|P62737|ACTA_MOUSE	Acta2	Actin, aortic smooth muscle OS=Mus musculus GN=Acta2 PE=1 SV=1	1833.55	1	1	85.68	42009	23	31	5	53	7	1983	45	17.7202	15.3914	15.5621	10.6507	10.7898	17.1829	14.8806	13.2315	18.7461	16.0792	12.0323	10.2934	10.8596	11.9233	12.4678	-0.543351	0.830416	34.6667	+		-2.27099	0.225461	358.333	+		-0.809875	0.70094	207.167	+		-2.53751	0.320747	185.833	+
sp|P60710|ACTB_MOUSE	Actb	Actin, cytoplasmic 1 OS=Mus musculus GN=Actb PE=1 SV=1	1780.02	2	0	81.6	41737	23	28	10	50	24	1792	473	19.3523	20.0472	17.2184	17.4159	19.1288	21.6209	21.7021	18.4614	18.2256	20.3839	18.005	18.1333	19.9476	20.0011	19.9828	0.178495	0.849959	0	+		-0.251113	0.81034	21.1667	+		1.71982	0.167227	12.1667	+		1.29021	0.112753	9	+
sp|Q8BFZ3|ACTBL_MOUSE	Actbl2	Beta-actin-like protein 2 OS=Mus musculus GN=Actbl2 PE=1 SV=1	549.323	1	0	40.96	42004	24	12	2	20	3	642	16	15.2461	19.3834	16.482	17.0941	13.4709	20.7778	20.8573	19.2685	18.1599	14.5746	17.5666	18.0402	10.8596	18.6479	19.821	0.0339317	0.978572	26.1667	+		-2.15075	0.522716	0	+		1.54224	0.459053	6.5	+		-0.642443	0.811631	19.6667	+
sp|Q9QY84|ACL7A_MOUSE	Actl7a	Actin-like protein 7A OS=Mus musculus GN=Actl7a PE=1 SV=1	9.716	1	0	1.82	49451	25	1	1	1	1	1	1	12.5908	10.6107	11.1338	10.6507	13.3507	11.2816	12.2565	11.6751	10.4887	11.2644	11.4233	10.2934	11.9591	12.8004	11.3406	-0.379021	0.510167	6.33333	+		-0.107638	0.872948	0	+		0.894503	0.215592	0	+		1.16589	0.0611934	6.33333	+
sp|Q7TPR4|ACTN1_MOUSE	Actn1	Alpha-actinin-1 OS=Mus musculus GN=Actn1 PE=1 SV=1	111.069	1	0	3.92	103068	58	3	1	3	1	16	9	10.5982	10.5517	10.6388	10.6507	11.9854	12.3089	12.188	11.9389	8.76174	12.9296	10.7458	10.2934	12.3957	12.8699	11.3406	0.0728097	0.935374	305.167	+		0.0967745	0.814746	842	+		1.49546	2.95553e-06	855.667	+	+	1.51943	0.220864	291.5	+
sp|Q9JI91|ACTN2_MOUSE	Actn2	Alpha-actinin-2 OS=Mus musculus GN=Actn2 PE=1 SV=2	44.192	1	0	2.24	103834	62	2	1	2	1	5	4	10.5982	9.99847	10.4455	12.051	14.3993	10.8819	10.9778	11.9882	9.13483	10.9356	10.5808	11.888	12.8123	11.0634	11.3406	-0.138464	0.854581	2	+		-0.323078	0.774742	0			1.28854	0.215754	0			1.10392	0.233128	2	+
sp|P57780|ACTN4_MOUSE	Actn4	Alpha-actinin-4 OS=Mus musculus GN=Actn4 PE=1 SV=1	127.353	1	0	6.14	104977	60	5	2	5	2	16	8	10.5983	10.4247	9.8314	9.92872	12.3017	11.9905	11.5494	11.9882	8.5341	13.1943	10.1465	10.438	12.8773	13.6158	11.4577	0.382461	0.711259	14.5	+		0.692823	0.271346	6	+		1.76169	0.000345869	8	+	+	2.07205	0.16133	12.5	+
sp|P61164|ACTZ_MOUSE	Actr1a	Alpha-centractin OS=Mus musculus GN=Actr1a PE=1 SV=1	88.56	2	0	4.26	42614	24	1	1	1	1	2	2	11.8666	10.2905	10.4455	13.5411	10.8731	10.8819	10.9778	11.9882	9.7182	12.1252	11.2724	13.4484	11.3993	11.0634	11.3406	0.10516	0.926147	1.66667	+		0.0874993	0.802312	0			-0.355638	0.673554	0	+		-0.373299	0.704432	1.66667	+
sp|P61161|ARP2_MOUSE	Actr2	Actin-related protein 2 OS=Mus musculus GN=Actr2 PE=1 SV=1	82.556	1	0	9.9	44761	21	3	3	4	4	6	6	13.6201	13.7908	12.4042	10.6507	10.7898	16.4241	16.0959	13.0203	11.7781	12.4791	11.3079	11.4829	14.4618	12.3886	11.3406	-0.854448	0.308992	18.5	+		-1.35222	0.477022	3	+		1.46608	0.372657	6.5	+		0.968309	0.293767	15	+
sp|Q99JY9|ARP3_MOUSE	Actr3	Actin-related protein 3 OS=Mus musculus GN=Actr3 PE=1 SV=3	130.511	1	1	19.38	47357	22	6	6	6	6	18	18	10.5982	12.4159	11.6378	15.8093	13.2757	16.7723	15.9706	11.5299	10.9545	13.4696	11.7028	15.5589	11.4799	12.4001	11.3406	0.306162	0.847432	0	+		-2.64695	0.12947	2	+		1.77185	0.325461	0	+		-1.18126	0.386086	2	+
sp|Q61072|ADAM9_MOUSE	Adam9	Disintegrin and metalloproteinase domain-containing protein 9 OS=Mus musculus GN=Adam9 PE=1 SV=2	117.582	1	0	9.23	92079	52	5	5	5	5	18	18	10.5982	13.6805	11.3277	10.6507	10.7898	10.8819	10.9778	11.9882	9.13483	13.9202	10.4164	10.8598	11.407	11.0634	11.3406	-0.481466	0.712608	10	+		0.110868	0.758626	0			-0.404808	0.620824	5	+		0.187526	0.882229	5	+
sp|Q8C0T9|ADCYA_MOUSE	Adcy10	Adenylate cyclase type 10 OS=Mus musculus GN=Adcy10 PE=2 SV=2	15.937	1	0	0.5	186412	96	1	1	1	1	1	1	16.1357	15.3806	14.6603	10.6507	15.0556	17.4131	15.9875	14.6561	11.0882	18.2585	10.5808	10.2934	15.8044	11.0634	11.3406	-1.65156	0.493643	2	+		-3.04193	0.0942195	0	+		1.57126	0.294361	0	+		0.180893	0.947189	2	+
sp|Q9QYC0|ADDA_MOUSE	Add1	Alpha-adducin OS=Mus musculus GN=Add1 PE=1 SV=2	41.928	1	0	3.4	80647	34	2	2	2	2	7	7	12.5635	12.8781	10.4455	10.6507	11.591	10.8819	10.9778	11.7572	10.3747	13.1366	10.5808	10.4144	13.8076	11.7327	11.3406	-0.50783	0.601683	2	+		0.991645	0.210482	0	+		-0.332465	0.636685	2	+		1.16701	0.304561	0	+
sp|Q9QYB5|ADDG_MOUSE	Add3	Gamma-adducin OS=Mus musculus GN=Add3 PE=1 SV=2	39.601	1	0	2.55	78777	32	2	2	2	2	5	5	13.3449	11.2201	10.4455	10.6507	10.9805	10.8819	10.9778	11.9882	11.3039	11.0065	10.6794	10.2934	12.869	12.0764	11.3406	-0.594466	0.427312	2	+		0.888206	0.124481	0	+		-0.208148	0.780276	2	+		1.27452	0.0365353	0	+
sp|Q8JZZ7|AGRL2_MOUSE	Adgrl2	Adhesion G protein-coupled receptor L2 OS=Mus musculus GN=Adgrl2 PE=1 SV=3	128.075	1	0	4.24	166577	72	4	4	4	4	13	13	13.9828	14.5876	10.8144	11.0184	14.9144	12.3317	14.3827	14.0079	10.2962	14.421	12.914	10.2934	13.7277	12.2088	11.3406	-0.619637	0.677005	363.167	+		-1.48346	0.153029	27.5	+		1.30837	0.290399	217	+		0.444549	0.753829	173.667	+
sp|Q8VDL4|ADPGK_MOUSE	Adpgk	ADP-dependent glucokinase OS=Mus musculus GN=Adpgk PE=1 SV=2	93.64	1	0	6.85	53902	22	3	3	3	3	12	12	10.5982	14.9011	13.4467	11.5482	10.904	10.7925	12.0825	11.9882	9.13483	15.8575	12.7778	12.4813	11.4305	12.983	11.3406	-0.0606798	0.972324	3.33333	+		0.476227	0.466025	0	+		-1.18176	0.291674	0	+		-0.644851	0.717822	3.33333	+
sp|Q9JKV1|ADRM1_MOUSE	Adrm1	Proteasomal ubiquitin receptor ADRM1 OS=Mus musculus GN=Adrm1 PE=1 SV=2	111.349	1	0	11.79	42060	12	3	3	3	3	39	39	14.1173	11.5985	12.1634	11.397	10.7898	10.8819	10.9778	11.9882	15.2387	12.5531	12.1136	11.7945	10.8596	11.0634	11.3406	0.605933	0.56762	4	+		-0.0715748	0.846031	0			-1.15959	0.139374	3	+		-1.8371	0.107538	1	+
sp|P54822|PUR8_MOUSE	Adsl	Adenylosuccinate lyase OS=Mus musculus GN=Adsl PE=1 SV=2	16.908	1	0	2.27	54866	31	1	1	1	1	1	1	11.2514	11.914	12.6093	11.8365	10.7898	10.8819	10.9778	11.9882	11.2036	12.2427	12.0986	11.5075	10.8596	11.0634	11.3406	-0.139705	0.719245	7	+		-0.0715748	0.846031	0			-0.743349	0.108054	3	+		-0.675219	0.0831796	4	+
sp|Q8JZQ2|AFG32_MOUSE	Afg3l2	AFG3-like protein 2 OS=Mus musculus GN=Afg3l2 PE=1 SV=1	21.7	1	0	3.74	89519	53	2	2	2	2	5	5	10.6387	10.2859	10.4026	10.6507	10.7898	11.0493	11.2742	11.9882	8.78915	11.5038	10.2999	10.4229	10.8333	11.5589	11.5535	-0.240519	0.68536	15.8333	+		0.0398576	0.917346	0	+		0.780925	0.0286513	10.1667	+		1.0613	0.184896	5.66667	+
sp|O89020|AFAM_MOUSE	Afm	Afamin OS=Mus musculus GN=Afm PE=1 SV=2	27.579	1	0	1.81	69379	39	1	1	1	1	3	3	11.8084	11.3038	10.4455	10.8518	10.7898	10.8819	10.9778	11.9882	9.13483	11.5863	11.2372	11.5601	11.3856	11.0634	11.3406	-0.222745	0.745856	2	+		0.103758	0.772924	0			0.0571064	0.892443	2	+		0.38361	0.607061	0	+
sp|Q8K2K6|AGFG1_MOUSE	Agfg1	Arf-GAP domain and FG repeat-containing protein 1 OS=Mus musculus GN=Agfg1 PE=1 SV=2	37.309	1	0	4.1	58043	19	1	1	1	1	8	8	10.5982	9.99847	13.7755	10.6507	10.7898	10.8819	10.9778	11.9882	12.4861	10.785	14.1148	10.2934	10.8596	11.0634	11.3406	0.664131	0.605212	2	+		-0.0715748	0.846031	0			-0.0962619	0.918065	2			-0.831967	0.458135	0	+
sp|Q80WC7|AGFG2_MOUSE	Agfg2	Arf-GAP domain and FG repeat-containing protein 2 OS=Mus musculus GN=Agfg2 PE=1 SV=1	57.429	1	0	4.18	48968	20	2	2	2	2	4	4	11.0354	9.99847	10.4358	10.6507	11.42	10.8819	10.9778	11.9882	12.1637	10.785	10.4145	10.2934	10.8596	11.0634	11.3406	0.384072	0.454872	3	+		-0.229131	0.507004	0			0.786918	0.055788	1	+		0.173714	0.752489	2	+
sp|Q8CJG0|AGO2_MOUSE	Ago2	Protein argonaute-2 OS=Mus musculus GN=Ago2 PE=1 SV=3	188.482	1	3	11.28	97304	59	8	8	10	10	29	29	15.0063	15.0905	13.9634	16.2172	10.7898	11.8159	14.3587	11.9882	15.0086	15.6169	14.1548	17.4292	12.0259	14.7179	12.5785	0.482997	0.583	3.66667	+		0.869269	0.47521	0	+		-2.8312	0.0185481	0	+		-2.44493	0.071147	3.66667	+
sp|O35083|PLCA_MOUSE	Agpat1	1-acyl-sn-glycerol-3-phosphate acyltransferase alpha OS=Mus musculus GN=Agpat1 PE=1 SV=1	18.097	1	0	7.37	31709	16	1	1	1	1	1	1	10.5982	10.2493	9.81585	10.6507	10.7898	10.8819	11.5684	11.9882	9.13483	10.785	10.5808	10.2934	10.8596	11.0634	11.3406	-0.129984	0.765236	3.5	+		-0.219212	0.566853	0			0.978585	0.0296219	1	+		0.889357	0.105937	2.5
sp|P11859|ANGT_MOUSE	Agt	Angiotensinogen OS=Mus musculus GN=Agt PE=1 SV=1	21.27	1	0	1.89	51990	22	1	1	1	1	2	2	10.5982	13.9871	10.4455	10.6507	10.7898	10.8819	10.9778	11.9882	12.171	10.785	10.5808	10.2934	10.8596	11.0634	11.3406	-0.462806	0.644361	11.6667			-0.0715748	0.846031	4.16667			-0.260913	0.781872	6.5			0.130318	0.807326	9.33333
sp|Q8BK64|AHSA1_MOUSE	Ahsa1	Activator of 90 kDa heat shock protein ATPase homolog 1 OS=Mus musculus GN=Ahsa1 PE=1 SV=2	21.922	1	0	6.51	38117	23	1	1	1	1	1	1	15.2244	9.99847	10.4455	11.6069	10.7898	10.8819	10.9778	11.9882	9.13483	13.0934	10.6597	13.0407	10.8596	11.0634	11.3406	-0.336645	0.833036	1	+		-0.0715748	0.846031	0			-0.659348	0.607514	1	+		-0.394278	0.745572	0	+
sp|P29699|FETUA_MOUSE	Ahsg	Alpha-2-HS-glycoprotein OS=Mus musculus GN=Ahsg PE=1 SV=1	269.06	1	0	31.3	37326	16	5	5	5	5	71	71	14.9772	14.5886	16.614	16.5383	10.7898	12.4254	10.9778	12.4639	13.9884	14.1008	16.1157	14.6934	11.4389	12.1351	11.3406	-0.954937	0.231017	293.167	+		-0.0260182	0.965634	268.5	+		-4.0153	0.00115015	331.667	+	+	-3.08639	0.00404164	230	+	+
sp|Q9Z0X1|AIFM1_MOUSE	Aifm1	Apoptosis-inducing factor 1, mitochondrial OS=Mus musculus GN=Aifm1 PE=1 SV=1	678.672	1	0	40.36	66765	34	17	17	19	19	57	57	10.4989	17.7053	11.8092	10.9953	16.4379	12.4715	12.5565	13.2948	13.9138	17.9891	10.5808	16.4906	13.81	15.2217	18.1483	1.99141	0.425673	28.8333	+		2.03649	0.242707	0	+		0.937985	0.64187	10.5	+		0.983066	0.673346	18.3333	+
sp|Q8BUE4|AIFM2_MOUSE	Aifm2	Apoptosis-inducing factor 2 OS=Mus musculus GN=Aifm2 PE=1 SV=1	12.678	1	0	3.49	40635	22	1	1	1	1	1	1	10.5982	9.82692	10.4455	10.6507	10.7898	10.8819	10.9778	11.9882	13.3796	10.785	10.5808	10.2934	10.8596	11.0634	11.3406	0.879389	0.278714	1			-0.0715748	0.846031	0			0.779139	0.0602249	1			-0.171825	0.84822	0
sp|P31230|AIMP1_MOUSE	Aimp1	Aminoacyl tRNA synthase complex-interacting multifunctional protein 1 OS=Mus musculus GN=Aimp1 PE=1 SV=2	84.11	1	0	12.58	33997	19	4	4	4	4	16	16	14.0197	14.3456	12.5561	13.5408	10.6497	12.3138	11.8529	11.8543	13.1608	13.9343	12.9852	13.7945	10.8596	12.7305	11.3406	-0.14686	0.757423	42.5	+		-0.0240787	0.971027	20	+		-1.94789	0.0102305	33	+	+	-1.8251	0.0202559	29.5	+	+
sp|Q8R010|AIMP2_MOUSE	Aimp2	Aminoacyl tRNA synthase complex-interacting multifunctional protein 2 OS=Mus musculus GN=Aimp2 PE=1 SV=2	98.244	1	0	16.56	35378	17	3	3	3	3	12	12	11.3555	12.7049	10.4455	14.6115	10.7898	10.8819	10.9778	11.9882	9.85483	12.1536	10.5808	15.3221	10.8596	11.0634	11.3406	-0.301485	0.848747	11	+		-0.0715748	0.846031	0			-1.11988	0.281892	8	+		-0.889965	0.56379	3	+
sp|Q91XC0|AJUBA_MOUSE	Ajuba	LIM domain-containing protein ajuba OS=Mus musculus GN=Ajuba PE=1 SV=1	11.183	1	0	3.29	57920	32	1	1	1	1	1	1	10.5982	9.99847	10.4461	10.6507	10.7898	10.8819	10.9778	11.9882	9.8457	10.785	10.5808	10.2934	10.8596	11.0634	11.3406	-0.0471141	0.857714	2			-0.0715748	0.846031	0			0.7361	0.05857	0			0.711639	0.0449208	2
sp|Q9WTP6|KAD2_MOUSE	Ak2	Adenylate kinase 2, mitochondrial OS=Mus musculus GN=Ak2 PE=1 SV=5	63.641	1	0	10.46	26469	17	1	1	1	1	3	3	10.5982	9.43867	10.4455	10.6507	10.7898	11.4046	10.9778	11.9882	9.13483	10.785	10.5808	10.2934	10.8596	11.0634	11.3406	-0.0847284	0.861671	24.1667			-0.202246	0.572929	0			1.00687	0.0415491	11.5		+	0.889357	0.105937	12.6667
sp|O88845|AKA10_MOUSE	Akap10	A-kinase anchor protein 10, mitochondrial OS=Mus musculus GN=Akap10 PE=1 SV=3	87.337	1	0	4.08	73632	37	2	2	2	2	27	27	14.7215	10.1531	10.4455	10.6507	10.8225	10.3922	9.869	11.9882	12.1804	12.1979	10.5808	10.2934	12.2979	10.957	11.3406	-0.179559	0.885485	13	+		0.763855	0.279068	3	+		-0.724711	0.558879	5	+		0.218703	0.763634	11	+
sp|E9Q394|AKP13_MOUSE	Akap13	A-kinase anchor protein 13 OS=Mus musculus GN=Akap13 PE=1 SV=1	72.963	1	0	0.61	303976	148	1	1	1	1	5	5	11.1946	9.99847	10.4455	10.6507	10.7898	10.8819	10.9778	11.9882	8.84751	10.785	10.5808	10.2934	10.8596	11.0634	11.3406	-0.445608	0.410229	2.33333			-0.0715748	0.846031	0			0.587154	0.166812	0			0.961187	0.130264	2.33333
sp|O54931|AKAP2_MOUSE	Akap2	A-kinase anchor protein 2 OS=Mus musculus GN=Akap2 PE=1 SV=3	59.835	1	0	5.04	98579	43	3	3	3	3	5	5	10.9558	10.3391	12.866	12.0652	10.4622	10.8819	10.9778	11.9882	11.3118	11.2208	13.1533	13.1184	10.2765	11.7322	11.6547	0.644559	0.440672	3	+		0.143583	0.80463	0	+		-0.478966	0.489105	0	+		-0.979941	0.249059	3	+
sp|Q9DBR0|AKAP8_MOUSE	Akap8	A-kinase anchor protein 8 OS=Mus musculus GN=Akap8 PE=1 SV=1	186.918	1	0	12.37	76294	31	6	6	6	6	52	52	15.6283	13.8923	16.1992	11.0962	11.8411	10.7266	10.9778	12.3205	14.6502	15.2924	16.0466	11.9625	13.7191	10.7987	11.3406	0.283912	0.851274	57.3333	+		0.48628	0.600164	26.5	+		-2.73751	0.0634912	45.5	+		-2.53514	0.106982	38.3333	+
sp|Q9R0L7|AKP8L_MOUSE	Akap8l	A-kinase anchor protein 8-like OS=Mus musculus GN=Akap8l PE=1 SV=1	31.807	1	0	2.02	71454	28	1	1	1	1	13	13	11.4309	10.2529	10.9174	10.6507	11.5063	10.8819	10.3626	11.9882	11.9827	11.2744	11.1491	10.2934	11.7019	11.0634	11.3406	0.361933	0.427643	67.1667	+		0.183856	0.698617	0	+		0.371794	0.423448	19.6667	+		0.193717	0.676835	47.5	+
sp|Q70FJ1|AKAP9_MOUSE	Akap9	A-kinase anchor protein 9 OS=Mus musculus GN=Akap9 PE=1 SV=2	24.394	1	0	0.21	436211	269	1	1	1	1	5	5	11.3742	9.99847	10.4455	17.7538	11.0621	10.8819	14.3146	14.075	9.13483	10.785	10.5808	17.7913	10.8596	11.0634	14.0428	-0.31998	0.907969	2	+		-0.594798	0.688443	0	+		0.190435	0.928518	2	+		-0.0843829	0.973887	0
sp|Q9JII6|AK1A1_MOUSE	Akr1a1	Alcohol dehydrogenase [NADP(+)] OS=Mus musculus GN=Akr1a1 PE=1 SV=3	172.458	1	0	27.38	36587	25	7	7	7	7	62	62	14.7042	15.4971	16.9346	16.6641	10.7898	15.2439	13.4645	13.3097	15.7184	15.0222	16.9675	15.4662	10.8596	12.5963	13.6337	-0.156426	0.822115	6.5	+		-0.838751	0.5406	0	+		-2.74803	0.0401317	5.5	+	+	-3.43036	0.00940146	1	+
sp|P45376|ALDR_MOUSE	Akr1b1	Aldose reductase OS=Mus musculus GN=Akr1b1 PE=1 SV=3	205.004	1	1	32.91	35732	21	10	10	11	11	73	73	16.982	15.9703	17.9199	17.5187	11.7627	16.4182	11.1037	11.8256	15.6119	16.162	17.4414	16.5556	10.9567	14.3436	10.6414	-0.654976	0.295266	110.333	+		-0.797002	0.668871	85.5	+		-4.32016	0.0156986	98.8333	+	+	-4.46218	0.00945088	97	+	+
sp|Q9DCT1|AKCL2_MOUSE	Akr1e2	1,5-anhydro-D-fructose reductase OS=Mus musculus GN=Akr1e2 PE=1 SV=1	20.579	1	0	2.66	34461	20	1	1	1	1	15	15	11.4614	12.9291	15.0453	14.8175	10.7898	13.3871	10.9778	11.9882	13.846	13.1825	14.7072	10.2934	10.8596	11.574	11.3406	-0.556079	0.678531	1.66667	+		-0.52768	0.49981	0			-1.77759	0.136509	0	+		-1.74919	0.187401	1.66667	+
sp|Q8CG76|ARK72_MOUSE	Akr7a2	Aflatoxin B1 aldehyde reductase member 2 OS=Mus musculus GN=Akr7a2 PE=1 SV=3	314.88	1	0	33.24	40612	18	10	10	12	12	120	120	19.7708	15.4611	15.1737	15.4542	11.5402	16.3389	10.2793	11.3544	18.9894	16.7125	14.8668	16.1111	15.7707	12.6935	11.3406	0.204989	0.888504	2.5	+		0.89008	0.665114	0	+		-4.08678	0.0575039	1.5	+		-3.40169	0.0724712	1	+
sp|P07724|ALBU_MOUSE	Alb	Serum albumin OS=Mus musculus GN=Alb PE=1 SV=3	2229.59	1	0	80.92	68693	43	51	49	56	54	3879	3690	23.9898	22.9544	23.3973	24.5843	24.6435	24.1641	24.0208	23.9596	23.1477	22.8875	24.4547	24.0245	24.7582	24.3033	26.114	-0.102848	0.84704	98.1667	+		0.861524	0.139381	918.333	+		0.465525	0.274343	522	+		1.4299	0.0722363	494.5	+
sp|Q61490|CD166_MOUSE	Alcam	CD166 antigen OS=Mus musculus GN=Alcam PE=1 SV=3	136.197	1	0	13.89	65092	33	6	6	6	6	11	11	10.5982	15.5782	10.4455	10.6507	12.5765	10.8819	10.9778	12.8326	12.8736	15.4198	10.5808	10.2148	10.8596	11.0634	11.8089	0.45412	0.802576	426.167	+		-0.573217	0.422064	196.5	+		-0.000916909	0.999482	386.5	+		-1.02825	0.508128	236.167	+
sp|Q9Z110|P5CS_MOUSE	Aldh18a1	Delta-1-pyrroline-5-carboxylate synthase OS=Mus musculus GN=Aldh18a1 PE=1 SV=2	345.203	1	0	22.14	87266	50	13	13	13	13	45	45	12.2241	16.5148	11.8668	11.0265	12.3599	11.794	10.9778	12.0962	12.3174	17.1316	10.6903	10.6466	11.0549	10.5555	12.38	-0.211585	0.917592	3	+		-0.476843	0.446299	0	+		-1.10109	0.417242	1	+		-1.36635	0.496711	2	+
sp|Q8K009|AL1L2_MOUSE	Aldh1l2	Mitochondrial 10-formyltetrahydrofolate dehydrogenase OS=Mus musculus GN=Aldh1l2 PE=1 SV=2	156.111	1	0	7.8	101590	61	5	5	5	5	12	12	10.8674	14.2174	12.1653	10.6507	10.7898	14.7517	13.9983	11.9882	11.1734	14.2848	12.3826	10.2934	11.5926	15.0156	11.3406	0.0583489	0.962495	46	+		-0.232455	0.879977	4	+		0.906823	0.486571	27.5	+		0.616019	0.683377	22.5	+
sp|P47738|ALDH2_MOUSE	Aldh2	Aldehyde dehydrogenase, mitochondrial OS=Mus musculus GN=Aldh2 PE=1 SV=1	163.208	1	5	12.33	56538	27	6	6	6	6	21	21	10.5334	15.2948	10.4455	10.6507	10.9394	11.2219	10.9778	11.9882	11.7104	15.9077	10.9462	10.2934	10.7862	11.1106	11.3406	0.483358	0.789982	106.167	+		-0.2027	0.552033	36.1667	+		-0.449244	0.723919	46	+		-1.1353	0.483919	96.3333	+
sp|P47740|AL3A2_MOUSE	Aldh3a2	Fatty aldehyde dehydrogenase OS=Mus musculus GN=Aldh3a2 PE=1 SV=2	32.387	1	0	4.96	53971	22	2	2	2	2	5	5	15.6889	15.504	19.137	19.8386	12.4443	13.6693	15.8403	19.0176	13.4573	15.591	18.461	18.546	16.1013	18.5528	19.6472	-1.02832	0.560981	7.5	+		2.85757	0.196294	0	+		-2.29927	0.256363	1.5	+		1.58662	0.392951	6	+
sp|P05064|ALDOA_MOUSE	Aldoa	Fructose-bisphosphate aldolase A OS=Mus musculus GN=Aldoa PE=1 SV=2	199.697	1	2	20.88	39356	24	9	9	9	9	67	67	18.694	16.3875	17.1633	16.1691	16.8789	17.0868	16.4505	15.2832	16.4835	17.5683	17.1948	16.3622	16.4337	17.2484	15.5879	-0.201267	0.763802	1	+		-0.00152705	0.998139	0	+		-0.678611	0.369278	0	+		-0.478871	0.404682	1	+
sp|Q3TSG4|ALKB5_MOUSE	Alkbh5	RNA demethylase ALKBH5 OS=Mus musculus GN=Alkbh5 PE=1 SV=2	101.873	1	0	14.43	44411	21	3	3	3	3	9	9	11.0657	11.1996	11.2826	12.6859	10.7898	11.7114	10.9778	11.9882	11.9003	11.4905	13.1245	13.9517	10.8596	11.0634	11.3406	1.0583	0.170353	1	+		-0.278953	0.472472	0			-0.191615	0.700659	1	+		-1.52887	0.0737581	0	+
sp|O08583|THOC4_MOUSE	Alyref	THO complex subunit 4 OS=Mus musculus GN=Alyref PE=1 SV=3	262.047	1	1	40	26940	15	7	7	7	7	122	122	10.3386	14.7582	16.0109	14.0985	16.7553	18.4215	18.1301	14.9584	13.9607	16.0415	16.1923	16.3273	15.983	17.5639	17.158	1.8289	0.222086	6	+		-0.164701	0.877626	12	+		3.26478	0.0659187	8	+		1.27118	0.160487	10	+
sp|Q07456|AMBP_MOUSE	Ambp	Protein AMBP OS=Mus musculus GN=Ambp PE=1 SV=2	123.507	1	0	14.04	39029	20	4	4	4	4	26	26	13.9668	14.7418	14.1337	15.9063	11.3137	13.785	13.4991	14.7971	14.4236	14.1599	14.1958	14.6917	12.1558	13.8611	14.5662	-0.319409	0.509878	17.6667	+		0.179014	0.871804	24.6667	+		-1.33842	0.168411	19.1667	+		-0.839998	0.23087	23.1667	+
sp|Q810B6|ANFY1_MOUSE	Ankfy1	Rabankyrin-5 OS=Mus musculus GN=Ankfy1 PE=1 SV=2	28.284	1	0	1.11	128653	61	1	1	1	1	1	1	10.5982	10.0271	10.4455	10.6507	10.7898	11.6915	10.9778	11.9882	9.13483	10.785	10.3697	10.2934	10.8596	11.0634	11.3406	-0.284609	0.483314	0			-0.273968	0.477454	3.5			0.931481	0.0263862	1			0.942123	0.0823845	2.5
sp|Q6ZPS6|AKIB1_MOUSE	Ankib1	Ankyrin repeat and IBR domain-containing protein 1 OS=Mus musculus GN=Ankib1 PE=1 SV=2	43.908	1	0	4.15	121876	61	3	3	3	3	8	8	10.5982	9.99847	11.9199	10.6507	11.7147	10.8819	10.9778	11.9882	13.6486	10.785	10.0898	10.2934	11.5187	11.0634	11.3406	0.412374	0.670087	4.66667	+		-0.0831132	0.817112	0			0.598853	0.265197	2			0.103366	0.920556	2.66667	+
sp|Q99NH0|ANR17_MOUSE	Ankrd17	Ankyrin repeat domain-containing protein 17 OS=Mus musculus GN=Ankrd17 PE=1 SV=2	536.362	1	0	9.6	274213	102	18	18	19	19	71	71	14.7091	12.7179	16.6368	13.3153	14.4971	12.6885	13.9664	13.1025	16.8766	13.0153	15.8558	10.2934	11.2979	14.3721	12.4482	-0.334484	0.852264	25.6667	+		-0.857591	0.381051	0	+		-0.78112	0.447799	13.1667	+		-1.30423	0.524942	12.5	+
sp|Q69ZU8|ANKR6_MOUSE	Ankrd6	Ankyrin repeat domain-containing protein 6 OS=Mus musculus GN=Ankrd6 PE=1 SV=2	18.887	1	0	1.26	77982	47	1	1	1	1	2	2	17.5003	15.3806	14.6603	10.6507	15.0556	17.4131	15.9875	14.8363	11.0882	14.4779	10.5808	10.2934	15.9909	11.0634	11.3406	-2.93789	0.140324	9	+		-3.02483	0.100873	0	+		1.27517	0.441388	6	+		1.18823	0.530042	3	+
sp|P59672|ANS1A_MOUSE	Anks1a	Ankyrin repeat and SAM domain-containing protein 1A OS=Mus musculus GN=Anks1a PE=1 SV=3	35.994	1	0	1.13	125242	58	1	1	1	1	2	2	11.5549	10.002	10.4455	10.6507	10.7898	10.8819	10.8147	11.9882	9.4159	10.249	10.5808	10.2934	10.8596	11.0634	11.3406	-0.528467	0.246596	22.8333	+		-0.0307787	0.935714	0			0.455388	0.337622	8.5	+		0.953076	0.0304246	14.3333	+
sp|Q80UU1|ANKZ1_MOUSE	Ankzf1	Ankyrin repeat and zinc finger domain-containing protein 1 OS=Mus musculus GN=Ankzf1 PE=1 SV=2	72.831	1	0	3.74	82976	38	2	2	2	2	9	9	10.9519	9.99847	10.4455	10.6507	10.0796	10.8819	10.9778	11.4519	12.3977	11.039	10.5808	8.51804	10.2265	11.0634	11.3406	0.122271	0.887498	8.5	+		0.0290088	0.949785	0	+		0.33619	0.371426	5	+		0.242928	0.816199	3.5	+
sp|Q8K298|ANLN_MOUSE	Anln	Anillin OS=Mus musculus GN=Anln PE=1 SV=2	277.966	1	0	10.17	122794	65	8	8	9	9	68	68	15.2694	12.3902	13.9945	13.9866	12.194	12.5219	13.041	12.5307	14.5018	12.7267	14.3404	15.1651	12.7251	12.9017	12.125	0.27331	0.739399	8.5	+		0.0120326	0.968011	12.3333	+		-1.33829	0.0724284	12.8333	+		-1.59957	0.0553035	8	+
sp|Q6DFX2|ANTR2_MOUSE	Antxr2	Anthrax toxin receptor 2 OS=Mus musculus GN=Antxr2 PE=1 SV=1	35.251	1	0	2.67	53184	27	1	1	1	1	6	6	10.5982	12.1241	10.4455	10.6507	10.7898	10.8819	10.9778	11.9882	9.13483	13.0881	10.5808	10.2934	10.8596	11.0634	11.3406	-0.180324	0.851073	25			-0.0715748	0.846031	0			0.204841	0.685248	14			0.31359	0.764571	11
sp|P10107|ANXA1_MOUSE	Anxa1	Annexin A1 OS=Mus musculus GN=Anxa1 PE=1 SV=2	55.842	1	0	8.67	38734	25	3	3	3	3	18	18	11.8713	10.3238	13.5754	10.6507	14.5732	13.533	13.8454	11.9882	10.0378	13.5748	14.4704	10.2934	13.3906	15.4607	11.8641	0.488827	0.729375	13	+		0.0868477	0.939256	0	+		1.87964	0.0859263	8	+		1.47766	0.396949	5	+
sp|P97384|ANX11_MOUSE	Anxa11	Annexin A11 OS=Mus musculus GN=Anxa11 PE=1 SV=2	295.022	1	0	18.89	54079	22	7	7	7	7	21	21	15.0542	12.7451	16.7612	14.0421	16.7482	13.3803	13.5644	11.9882	13.0003	13.3979	16.5646	13.8397	13.2951	12.6547	12.9291	-0.450031	0.713728	0	+		-0.960655	0.459928	25.1667	+		-0.73036	0.598836	10.1667	+		-1.24098	0.255504	15	+
sp|P07356|ANXA2_MOUSE	Anxa2	Annexin A2 OS=Mus musculus GN=Anxa2 PE=1 SV=2	222.042	1	0	30.09	38676	25	8	8	8	8	113	113	16.0088	14.503	16.4161	15.5681	16.0619	16.5548	17.0146	15.7451	14.3655	15.8099	17.2554	15.6348	17.4421	17.5051	16.278	0.142398	0.849909	14.5	+		0.730976	0.180027	4	+		0.720066	0.19779	9.5	+		1.30864	0.152279	9	+
sp|O35639|ANXA3_MOUSE	Anxa3	Annexin A3 OS=Mus musculus GN=Anxa3 PE=1 SV=4	30.791	1	0	2.79	36384	24	1	1	1	1	4	4	10.5982	9.99847	14.3676	10.6507	15.8728	10.8819	10.9778	11.9882	11.4979	11.8761	14.1916	10.2934	12.247	11.0634	11.3406	0.561023	0.678721	2	+		-0.879884	0.563035	0			1.02646	0.530339	0			-0.414452	0.69855	2	+
sp|P48036|ANXA5_MOUSE	Anxa5	Annexin A5 OS=Mus musculus GN=Anxa5 PE=1 SV=1	15.216	1	0	2.82	35752	25	1	1	1	1	2	2	10.5982	11.358	12.9002	10.6507	10.7898	12.498	10.9778	11.9882	10.9218	11.5284	13.8994	10.2934	14.8832	13.2589	11.3406	0.283974	0.775776	5	+		1.59742	0.165124	0	+		0.186697	0.791048	0	+		1.50014	0.289225	5	+
sp|O35643|AP1B1_MOUSE	Ap1b1	AP-1 complex subunit beta-1 OS=Mus musculus GN=Ap1b1 PE=1 SV=2	356.847	1	0	21.95	103935	49	16	6	17	6	89	32	15.1019	14.0401	14.8165	13.8655	10.7898	10.8819	10.9778	12.4772	14.6568	14.2151	14.7167	14.978	10.8596	11.0634	11.9077	0.185619	0.602547	2	+		-0.0047764	0.99334	0			-3.17433	0.000710595	0	+		-3.36472	0.000149827	2	+
sp|P22892|AP1G1_MOUSE	Ap1g1	AP-1 complex subunit gamma-1 OS=Mus musculus GN=Ap1g1 PE=1 SV=3	28.114	1	0	2.92	91350	45	2	2	2	2	5	5	11.7126	13.2084	12.7587	10.6507	10.7898	10.8819	10.9778	11.9882	12.507	13.0058	12.3055	10.8558	10.8596	11.0634	11.3406	0.0859351	0.910649	53.1667	+		-0.0715748	0.846031	0			-0.923151	0.196499	30.3333	+		-1.08066	0.110814	22.8333	+
sp|P17426|AP2A1_MOUSE	Ap2a1	AP-2 complex subunit alpha-1 OS=Mus musculus GN=Ap2a1 PE=1 SV=1	338.16	1	0	21.08	107664	60	15	7	15	7	78	31	15.3663	13.3638	12.6974	12.3739	10.7898	12.3055	12.1157	12.7965	15.0264	13.6276	12.3762	13.7423	11.7604	11.0634	11.9101	0.2428	0.787728	7.83333	+		-0.423905	0.477378	0	+		-1.44849	0.11879	3	+		-2.11519	0.0261044	4.83333	+	+
sp|P17427|AP2A2_MOUSE	Ap2a2	AP-2 complex subunit alpha-2 OS=Mus musculus GN=Ap2a2 PE=1 SV=2	655.218	1	0	31.88	104017	59	24	16	26	18	145	98	15.7913	16.5879	16.8236	17.6378	13.5047	13.9925	15.0044	13.9765	16.874	15.7938	16.4159	17.9096	18.6892	12.69	15.9261	0.0381659	0.950174	11.3333	+		1.64892	0.321106	0	+		-2.59063	0.00193352	4	+		-0.979876	0.553423	7.33333	+
sp|Q9DBG3|AP2B1_MOUSE	Ap2b1	AP-2 complex subunit beta OS=Mus musculus GN=Ap2b1 PE=1 SV=1	488.789	1	0	30.2	104583	48	21	11	22	11	130	73	15.5539	15.9356	15.9266	16.6172	13.4716	11.4449	12.0306	13.619	16.6061	16.394	15.7039	16.491	11.792	13.4877	17.3678	0.290445	0.371108	87.3333	+		1.57431	0.347643	2.5	+		-3.36677	0.00114807	28.6667	+	+	-2.08291	0.197348	61.1667	+
sp|P84091|AP2M1_MOUSE	Ap2m1	AP-2 complex subunit mu OS=Mus musculus GN=Ap2m1 PE=1 SV=1	269.264	1	0	28.97	49655	29	12	12	14	14	73	73	18.4859	16.8745	17.3182	16.5713	18.0857	17.4126	16.789	11.9882	17.2697	17.636	17.3278	16.6929	18.8554	19.1738	11.3406	-0.0809095	0.867279	2	+		0.387747	0.891303	5	+		-1.24363	0.423402	4	+		-0.774978	0.733725	3	+
sp|Q9Z1T1|AP3B1_MOUSE	Ap3b1	AP-3 complex subunit beta-1 OS=Mus musculus GN=Ap3b1 PE=1 SV=2	120.736	1	1	7.87	122740	64	8	8	8	8	19	19	13.9852	9.99847	10.4455	12.1935	13.4456	10.8819	10.9778	12.7576	16.0071	12.7185	11.2453	10.2934	17.7065	11.0634	11.3406	0.910413	0.577541	2	+		1.35441	0.521964	0	+		0.360083	0.757428	0	+		0.804083	0.745322	2	+
sp|O54774|AP3D1_MOUSE	Ap3d1	AP-3 complex subunit delta-1 OS=Mus musculus GN=Ap3d1 PE=1 SV=1	61.128	1	0	5.67	135081	62	5	5	5	5	8	8	13.2994	9.99847	10.4455	10.6507	10.7898	10.8819	10.9778	11.9882	13.9015	10.785	10.5808	10.2934	10.8596	11.0634	11.3406	0.291697	0.804236	3			-0.0715748	0.846031	0			0.0609503	0.941497	1.66667			-0.302321	0.77554	1.33333
sp|Q9JKC8|AP3M1_MOUSE	Ap3m1	AP-3 complex subunit mu-1 OS=Mus musculus GN=Ap3m1 PE=1 SV=1	39.115	1	0	5.5	46936	24	1	1	1	1	5	5	10.5982	9.99847	10.4455	10.6507	12.8932	10.8819	10.9778	11.9882	13.4973	10.785	10.5808	10.2934	10.8596	11.0634	11.3406	0.86594	0.296555	1			-0.59742	0.344812	0			1.2621	0.0440088	1			-0.201262	0.829437	0
sp|Q9DCR2|AP3S1_MOUSE	Ap3s1	AP-3 complex subunit sigma-1 OS=Mus musculus GN=Ap3s1 PE=1 SV=2	27.839	1	0	5.7	21732	10	1	1	1	1	6	6	13.3492	9.71712	10.4455	10.6507	10.7898	10.8819	10.9778	11.9882	12.2949	10.7486	10.5808	10.2934	10.8596	11.0634	11.3406	-0.0611673	0.948755	12.3333	+		-0.0715748	0.846031	0			0.11885	0.892452	3	+		0.108443	0.849646	9.33333	+
sp|Q9Z1K7|APCL_MOUSE	Apc2	Adenomatous polyposis coli protein 2 OS=Mus musculus GN=Apc2 PE=1 SV=1	12.735	1	0	0.44	243139	137	1	1	1	1	1	1	13.3177	9.99407	11.25	10.6507	10.7898	12.2614	11.9776	12.6968	9.25108	11.7331	12.5698	11.5693	10.8596	13.1289	11.4425	-0.0222492	0.983159	4.5	+		-0.12107	0.877527	0	+		0.628319	0.476011	1.5	+		0.529499	0.624486	3	+
sp|P12246|SAMP_MOUSE	Apcs	Serum amyloid P-component OS=Mus musculus GN=Apcs PE=1 SV=2	239.771	1	0	27.23	26247	13	6	6	6	6	175	175	15.5792	18.1732	18.2742	18.4861	13.1655	17.627	17.3789	16.6595	17.6551	16.8856	18.1077	18.0982	14.8379	17.4629	17.1828	0.0584418	0.939924	5.5	+		0.286821	0.846648	0	+		-1.42048	0.296112	4	+		-1.1921	0.184499	1.5	+
sp|Q06335|APLP2_MOUSE	Aplp2	Amyloid-like protein 2 OS=Mus musculus GN=Aplp2 PE=1 SV=4	22.002	1	0	2.83	80467	34	1	1	1	1	1	1	10.984	10.3512	10.4455	10.6507	10.7898	10.8819	10.9778	11.9882	8.86497	10.785	10.5808	10.2934	12.3064	11.0634	11.3406	-0.476785	0.336	10	+		0.410676	0.409416	0			0.551611	0.127605	6	+		1.43907	0.062484	4
sp|Q9D7N9|APMAP_MOUSE	Apmap	Adipocyte plasma membrane-associated protein OS=Mus musculus GN=Apmap PE=1 SV=1	55.889	1	0	12.05	46434	25	3	3	3	3	3	3	10.5982	13.8163	10.4455	12.2603	10.7898	10.8819	10.7113	11.9882	11.067	13.6629	11.0419	11.9412	10.8596	11.0634	11.3406	0.148168	0.887489	4	+		-0.00494888	0.989959	0			-0.687252	0.448865	2	+		-0.84037	0.305719	2	+
sp|Q01339|APOH_MOUSE	Apoh	Beta-2-glycoprotein 1 OS=Mus musculus GN=Apoh PE=1 SV=1	64.521	1	0	15.07	38619	28	4	4	4	4	18	18	10.7827	12.8395	14.6545	12.621	10.7898	10.8819	11.8804	11.9882	12.8517	10.3795	14.323	10.5566	10.8596	11.1607	11.3406	-0.696711	0.593541	2	+		-0.264772	0.531987	0			-1.33932	0.167533	0	+		-0.90738	0.458454	2	+
sp|Q9DCZ4|MIC26_MOUSE	Apoo	MICOS complex subunit Mic26 OS=Mus musculus GN=Apoo PE=1 SV=2	111.54	1	0	24.75	22604	12	4	4	4	4	11	11	10.5982	14.7902	10.4455	10.6507	14.3256	10.8819	10.9778	11.9882	9.13483	15.3074	10.5808	10.2934	11.5131	11.0634	11.3406	-0.291997	0.871109	5.5			-0.737702	0.474261	0			0.422279	0.760984	3.5			-0.023426	0.988993	2
sp|Q78IK4|MIC27_MOUSE	Apool	MICOS complex subunit Mic27 OS=Mus musculus GN=Apool PE=1 SV=1	66.454	1	0	16.23	29261	20	4	4	4	4	15	15	9.7004	14.5624	11.1514	10.6507	12.0648	11.013	12.1163	11.9882	9.72918	16.1038	10.5808	12.0926	10.511	10.6039	11.3406	0.610381	0.741384	2	+		-0.977075	0.049986	0	+		0.279355	0.806462	1	+		-1.3081	0.472953	1	+
sp|P04627|ARAF_MOUSE	Araf	Serine/threonine-protein kinase A-Raf OS=Mus musculus GN=Araf PE=1 SV=2	61.926	1	0	5.63	67581	37	3	1	3	1	12	7	11.6627	11.013	12.0626	10.6507	10.7898	10.8819	10.9778	11.9882	12.4566	11.1663	11.5143	10.2934	10.8596	11.0634	11.3406	0.0104055	0.985478	3	+		-0.0715748	0.846031	0			-0.187815	0.672217	1	+		-0.269795	0.639753	2	+
sp|Q5XJY5|COPD_MOUSE	Arcn1	Coatomer subunit delta OS=Mus musculus GN=Arcn1 PE=1 SV=2	103.461	1	0	11.94	57229	31	6	6	6	6	26	26	16.1521	13.6179	15.024	11.5198	10.7898	10.6306	10.9778	11.9882	14.5995	13.921	15.0195	12.5412	10.8596	11.0634	11.3406	-0.0581361	0.960844	8	+		-0.0087574	0.982499	0			-2.98179	0.0289236	4	+		-2.93241	0.00642911	4	+
sp|Q8BSL7|ARF2_MOUSE	Arf2	ADP-ribosylation factor 2 OS=Mus musculus GN=Arf2 PE=1 SV=2	548.57	1	0	59.67	20746	11	11	1	15	1	274	2	13.2725	9.50182	10.4455	10.6507	11.0061	10.8819	10.9778	11.9882	11.6754	11.0593	10.5808	10.2934	10.8596	11.0634	11.3406	-0.0653668	0.942065	37.3333	+		-0.125644	0.717867	0			0.245896	0.781767	15.5	+		0.185619	0.642622	21.8333	+
sp|P61205|ARF3_MOUSE	Arf3	ADP-ribosylation factor 3 OS=Mus musculus GN=Arf3 PE=2 SV=2	682.621	2	0	65.19	20601	11	13	3	19	5	340	68	18.6461	11.6914	15.5136	11.9272	13.7623	12.5757	10.2245	11.9882	19.7718	12.5095	14.4614	12.7387	11.2529	11.9119	11.3406	0.425759	0.862961	56.3333	+		-0.635888	0.506306	0	+		-2.3069	0.249143	22	+		-3.36855	0.154299	34.3333	+
sp|P61750|ARF4_MOUSE	Arf4	ADP-ribosylation factor 4 OS=Mus musculus GN=Arf4 PE=1 SV=2	465.803	1	0	65.56	20397	11	10	4	12	5	210	51	18.7652	14.4488	12.3634	12.1363	11.7938	11.8537	10.9778	11.9882	17.6391	15.4196	13.3043	11.7698	12.6242	11.5747	11.3406	0.104822	0.959863	9.16667	+		0.193133	0.670013	0	+		-2.77502	0.124258	3	+		-2.68671	0.142949	6.16667	+
sp|P84084|ARF5_MOUSE	Arf5	ADP-ribosylation factor 5 OS=Mus musculus GN=Arf5 PE=1 SV=2	437.265	1	0	65.56	20530	12	10	4	13	6	205	46	18.0821	12.5815	11.6315	10.6507	13.2119	11.6543	11.931	11.9882	17.6962	13.8155	11.6647	10.765	13.5462	11.0634	11.3406	0.248928	0.916181	3.5	+		-0.212946	0.79434	0	+		-1.0401	0.562719	1	+		-1.50198	0.473788	2.5	+
sp|Q9EPJ9|ARFG1_MOUSE	Arfgap1	ADP-ribosylation factor GTPase-activating protein 1 OS=Mus musculus GN=Arfgap1 PE=1 SV=2	598.284	1	0	48.79	45288	24	13	13	13	13	63	63	14.4434	14.7323	15.2954	10.6507	15.6778	10.8819	10.9778	12.7443	19.0735	15.6987	13.8054	10.2934	10.6966	11.0634	11.3406	0.937302	0.673455	13.1667	+		-1.53693	0.301768	0	+		-1.20999	0.462307	5.5	+		-3.68422	0.151069	7.66667	+
sp|Q99K28|ARFG2_MOUSE	Arfgap2	ADP-ribosylation factor GTPase-activating protein 2 OS=Mus musculus GN=Arfgap2 PE=1 SV=1	527.824	1	0	32.31	56598	30	14	13	17	16	83	82	14.8021	15.2471	18.2473	14.9059	11.3436	16.1336	16.4207	14.0946	18.2999	14.1899	17.0343	14.3244	11.997	15.0614	13.3087	0.161509	0.905755	285.5	+		-1.0424	0.536895	2.66667	+		-1.30249	0.397823	167	+		-2.5064	0.136749	121.167	+
sp|Q9D8S3|ARFG3_MOUSE	Arfgap3	ADP-ribosylation factor GTPase-activating protein 3 OS=Mus musculus GN=Arfgap3 PE=1 SV=2	474.117	1	0	34.99	57456	33	16	15	17	16	56	55	12.0928	13.7819	16.0491	15.2482	11.2409	10.8819	10.9778	12.82	17.5085	10.785	15.4041	15.2121	14.8362	12.5508	17.2129	0.434438	0.802302	3	+		3.38648	0.0420058	130	+	+	-2.81284	0.028586	70.6667	+	+	0.139205	0.947628	62.3333	+
sp|A2A5R2|BIG2_MOUSE	Arfgef2	Brefeldin A-inhibited guanine nucleotide-exchange protein 2 OS=Mus musculus GN=Arfgef2 PE=1 SV=1	53.003	1	0	1.79	202240	109	2	2	2	2	3	3	12.2226	9.99847	10.4455	10.6507	11.5837	10.8819	10.9778	11.9882	10.9303	10.785	10.5808	10.2934	11.6887	11.0634	11.3406	-0.181904	0.730159	1			0.00631229	0.986079	22.6667			0.528632	0.373599	13.3333			0.716848	0.0234921	10.3333
sp|Q8K221|ARFP2_MOUSE	Arfip2	Arfaptin-2 OS=Mus musculus GN=Arfip2 PE=1 SV=2	29.057	1	0	4.99	37773	21	1	1	1	1	4	4	11.0214	9.99847	10.4455	10.6507	10.7898	10.8819	10.9778	11.9882	8.74006	10.785	9.70617	9.64579	10.8596	11.0634	11.3406	-0.809735	0.135388	5	+		-0.0715748	0.846031	0			0.630461	0.122675	2			1.36862	0.043234	3	+
sp|Q61176|ARGI1_MOUSE	Arg1	Arginase-1 OS=Mus musculus GN=Arg1 PE=1 SV=1	11.223	1	0	3.41	34808	18	1	1	1	1	1	1	12.6874	12.0531	13.2903	10.6507	12.8626	12.4055	14.2907	11.9882	12.1389	11.4095	14.3036	10.2934	12.6954	14.5936	11.3406	-0.134013	0.899533	3.5	+		-0.010224	0.992136	0	+		0.716352	0.379843	3.5	+		0.840141	0.538902	0	+
sp|Q3UL36|ARGL1_MOUSE	Arglu1	Arginine and glutamate-rich protein 1 OS=Mus musculus GN=Arglu1 PE=1 SV=2	34.618	1	0	11.44	32887	15	4	4	4	4	8	8	13.6155	12.4549	13.8958	10.9576	18.5961	15.0015	14.6052	13.3067	13.3559	13.4239	14.7105	12.069	17.7514	15.7437	11.8625	0.658844	0.472106	16.5	+		-0.258177	0.900908	0	+		2.64644	0.0908066	7	+		1.72942	0.323792	9.5	+
sp|Q3UIA2|RHG17_MOUSE	Arhgap17	Rho GTPase-activating protein 17 OS=Mus musculus GN=Arhgap17 PE=1 SV=1	52.271	1	1	3.9	92202	43	2	2	2	2	4	4	12.1	10.8215	10.4455	10.6507	11.0483	10.8819	10.9778	11.9882	8.76108	10.785	10.5808	10.2934	11.886	11.0634	11.3406	-0.899321	0.179368	3.5	+		0.205912	0.597165	0			0.219677	0.645005	0	+		1.32491	0.0710575	3.5
sp|Q6DFV3|RHG21_MOUSE	Arhgap21	Rho GTPase-activating protein 21 OS=Mus musculus GN=Arhgap21 PE=1 SV=1	24.461	1	0	1.39	215743	123	2	2	2	2	2	2	10.7795	11.5077	10.4455	10.6507	10.7161	10.8819	12.987	11.9882	13.2802	12.0537	10.5808	10.2934	10.8596	15.9638	11.3406	0.706216	0.371099	8	+		1.07805	0.504122	0	+		0.797478	0.216671	5	+		1.16932	0.494942	3	+
sp|Q69ZH9|RHG23_MOUSE	Arhgap23	Rho GTPase-activating protein 23 OS=Mus musculus GN=Arhgap23 PE=1 SV=2	12.411	1	0	0.81	161832	96	1	1	1	1	1	1	10.5982	12.2025	10.4455	10.6507	10.7898	10.8819	12.987	11.9882	13.1811	12.8183	10.5808	10.2934	10.8596	15.9638	11.3406	0.744197	0.415926	10.3333	+		1.05962	0.50971	0			0.687525	0.339325	2			1.00295	0.563506	8.33333	+
sp|A6X8Z5|RHG31_MOUSE	Arhgap31	Rho GTPase-activating protein 31 OS=Mus musculus GN=Arhgap31 PE=1 SV=1	364.237	1	0	13.75	155276	80	15	15	15	15	70	70	14.7806	12.6959	17.272	14.155	13.5194	12.4687	13.907	13.0158	16.096	10.785	16.793	12.5869	13.1219	12.3092	13.9113	-0.660629	0.713936	1	+		-0.113615	0.840131	0	+		-1.49813	0.186318	0	+		-0.951115	0.607079	1	+
sp|Q80YF9|RHG33_MOUSE	Arhgap33	Rho GTPase-activating protein 33 OS=Mus musculus GN=Arhgap33 PE=1 SV=1	43.005	1	2	1.46	139801	68	2	2	2	2	4	4	11.9167	9.99847	13.9402	13.2919	13.5194	10.8819	10.9778	11.9882	12.5705	10.785	14.4014	10.2934	12.7551	12.3092	11.3406	-0.274242	0.83719	2	+		0.293112	0.730549	0	+		-0.444985	0.690725	1	+		0.122369	0.920062	1	+
sp|O54834|RHG06_MOUSE	Arhgap6	Rho GTPase-activating protein 6 OS=Mus musculus GN=Arhgap6 PE=1 SV=3	154.848	1	0	10.44	108844	52	7	7	7	7	29	29	12.4419	11.6928	15.8954	11.683	14.601	12.1599	10.9778	12.4204	14.374	11.7171	15.1772	9.9304	13.5343	10.8857	11.455	-0.128629	0.937446	4.5	+		-0.581423	0.625546	0	+		-0.388516	0.767732	2	+		-0.84131	0.617406	2.5	+
sp|Q8R4H2|ARHGC_MOUSE	Arhgef12	Rho guanine nucleotide exchange factor 12 OS=Mus musculus GN=Arhgef12 PE=1 SV=2	230.636	1	0	9.53	172349	88	11	11	11	11	50	50	16.6078	14.0462	12.8481	16.7705	12.1127	12.554	13.4138	14.8608	14.8409	14.3696	11.8249	14.8262	12.7662	14.6927	16.9626	-1.10272	0.396306	1.66667	+		1.57189	0.261441	0	+		-1.83284	0.15952	1.66667	+		0.841776	0.553536	0	+
sp|Q80U35|ARHGH_MOUSE	Arhgef17	Rho guanine nucleotide exchange factor 17 OS=Mus musculus GN=Arhgef17 PE=1 SV=2	131.07	1	0	2.72	221671	97	4	4	4	4	23	23	13.5675	9.68686	12.0749	10.6507	10.7898	13.0651	11.0499	11.9882	12.5663	11.4329	11.8607	12.3544	10.8596	10.9331	11.3406	0.558579	0.551021	8.5	+		-0.678801	0.32579	0	+		0.228258	0.825664	2	+		-1.00912	0.0269428	6.5	+	+
sp|Q8BWA8|ARHGJ_MOUSE	Arhgef19	Rho guanine nucleotide exchange factor 19 OS=Mus musculus GN=Arhgef19 PE=1 SV=1	58.788	1	0	4.99	88851	50	2	2	2	2	5	5	11.2705	9.99847	10.4455	10.6507	10.7898	10.8819	10.9778	11.9882	11.7331	10.785	10.5808	10.2934	10.9153	11.0634	11.3406	0.256817	0.552855	8.5			-0.0530303	0.884214	0			0.568179	0.18963	3			0.258331	0.530265	5.5
sp|Q60875|ARHG2_MOUSE	Arhgef2	Rho guanine nucleotide exchange factor 2 OS=Mus musculus GN=Arhgef2 PE=1 SV=4	211.018	1	0	10.56	111974	61	10	10	10	10	38	38	16.9445	14.0428	13.1856	10.6507	10.7898	10.8819	10.9778	11.9882	16.3995	14.847	12.1543	10.3812	10.8596	11.0634	14.0726	-0.260367	0.893811	3.5	+		0.839081	0.408091	0			-2.54644	0.103478	2	+		-1.44699	0.461362	1.5	+
sp|Q8K4I3|ARHG6_MOUSE	Arhgef6	Rho guanine nucleotide exchange factor 6 OS=Mus musculus GN=Arhgef6 PE=1 SV=1	77.56	1	0	4.28	87051	50	3	1	3	1	14	6	12.2287	9.99847	10.4455	10.6507	10.7898	10.8819	10.9778	11.9882	10.1813	10.785	9.92007	9.93378	10.8596	11.0634	11.3406	-0.6258	0.279056	7	+		-0.0715748	0.846031	0			0.328619	0.578631	4			0.882845	0.0211441	3	+
sp|Q9ES28|ARHG7_MOUSE	Arhgef7	Rho guanine nucleotide exchange factor 7 OS=Mus musculus GN=Arhgef7 PE=1 SV=2	220.237	1	0	12.65	97056	54	11	9	11	9	82	74	17.3555	12.1368	14.624	10.6724	10.9759	10.8819	10.5718	11.9882	15.6885	12.6049	14.8032	12.7873	10.8596	10.7655	12.5133	0.273807	0.873778	39.5	+		0.274997	0.664837	20	+		-2.59272	0.134381	29	+		-2.59153	0.0511697	30.5	+
sp|P61211|ARL1_MOUSE	Arl1	ADP-ribosylation factor-like protein 1 OS=Mus musculus GN=Arl1 PE=1 SV=1	224.101	1	0	27.62	20412	10	4	4	6	6	35	35	14.9838	14.1402	10.4455	10.6507	10.7898	10.8819	10.9778	11.9882	17.5583	13.5711	10.5808	14.1816	15.5038	11.0634	11.3406	1.41792	0.472405	6.33333	+		1.47647	0.289303	0			-1.39559	0.290783	2	+		-1.33704	0.547926	4.33333	+
sp|O88848|ARL6_MOUSE	Arl6	ADP-ribosylation factor-like protein 6 OS=Mus musculus GN=Arl6 PE=1 SV=1	26.515	1	0	9.68	20959	14	3	3	3	3	7	7	10.5982	9.99847	10.4455	10.6507	10.7898	10.8819	10.9778	11.9882	14.6747	11.6545	10.5808	10.2934	10.8596	11.0634	11.3406	1.37768	0.222556	111.5	+		-0.0715748	0.846031	0			0.736253	0.0585291	60.5			-0.713	0.575482	51	+
sp|Q9JKW0|AR6P1_MOUSE	Arl6ip1	ADP-ribosylation factor-like protein 6-interacting protein 1 OS=Mus musculus GN=Arl6ip1 PE=1 SV=1	52.176	1	0	13.79	23437	7	1	1	2	2	3	3	10.5982	11.4191	10.4455	10.6507	10.7898	10.8819	10.9778	11.9882	9.13483	11.9298	10.5808	10.2934	10.8596	11.0634	11.3406	-0.293643	0.64949	6			-0.0715748	0.846031	0			0.381087	0.323048	2			0.603156	0.421608	4
sp|Q8R5J9|PRAF3_MOUSE	Arl6ip5	PRA1 family protein 3 OS=Mus musculus GN=Arl6ip5 PE=1 SV=2	39.756	1	0	9.57	21558	5	2	2	2	2	3	3	10.5982	14.3889	10.4455	10.6507	10.7898	10.8819	10.9778	11.9882	9.13483	14.372	10.5808	10.2934	10.8596	11.0634	11.3406	-0.42555	0.784145	4.66667			-0.0715748	0.846031	0			-0.361362	0.7294	3			-0.00738727	0.995843	1.66667
sp|Q8VEH3|ARL8A_MOUSE	Arl8a	ADP-ribosylation factor-like protein 8A OS=Mus musculus GN=Arl8a PE=1 SV=1	62.969	1	0	15.05	21390	13	3	1	4	1	22	1	11.3871	13.3456	10.4455	10.6507	10.7898	10.8819	10.9778	11.9882	11.0333	13.896	10.5808	10.2934	10.8596	11.0634	11.3406	-0.0063203	0.995438	1	+		-0.0715748	0.846031	0			-0.297752	0.692603	0	+		-0.363007	0.728336	1	+
sp|Q9CQW2|ARL8B_MOUSE	Arl8b	ADP-ribosylation factor-like protein 8B OS=Mus musculus GN=Arl8b PE=1 SV=1	63.549	1	0	19.89	21539	13	4	2	5	2	23	2	15.0047	14.656	10.8853	10.6507	10.7898	12.0711	10.9778	11.9882	13.2792	16.0525	11.7755	10.2934	10.8596	13.4534	11.3406	0.0510133	0.977048	5	+		0.427805	0.604486	5	+		-1.34242	0.314159	3	+		-0.965627	0.572458	7	+
sp|Q6A058|ARMX2_MOUSE	Armcx2	Armadillo repeat-containing X-linked protein 2 OS=Mus musculus GN=Armcx2 PE=2 SV=2	46.024	1	0	1.53	81036	35	1	1	1	1	2	2	12.9804	9.99847	10.4455	10.6507	10.7898	10.8819	10.9778	11.9882	9.894	10.785	10.5808	10.2934	10.8596	11.0634	11.3406	-0.63045	0.39949	1.66667			-0.0715748	0.846031	0			0.14069	0.852298	0			0.699565	0.0414559	1.66667
sp|Q9R0Q6|ARC1A_MOUSE	Arpc1a	Actin-related protein 2/3 complex subunit 1A OS=Mus musculus GN=Arpc1a PE=1 SV=1	16.492	1	0	2.7	41626	23	1	1	1	1	1	1	10.5982	10.0668	10.4455	10.6507	11.6797	13.6471	12.8218	11.9882	9.13483	10.5368	10.5808	10.2934	11.7962	11.0634	11.3406	-0.303806	0.436489	5			-1.13413	0.0956436	0	+		2.09391	0.00395434	3	+		1.26359	0.034923	2
sp|Q9WV32|ARC1B_MOUSE	Arpc1b	Actin-related protein 2/3 complex subunit 1B OS=Mus musculus GN=Arpc1b PE=1 SV=4	30.988	1	0	4.84	41064	19	1	1	1	1	2	2	10.5982	10.8461	10.4455	10.6507	10.7898	14.6979	14.2636	11.9882	9.13483	12.7088	10.5808	10.2934	11.2202	12.3707	11.3406	0.0443578	0.954741	3			-1.29105	0.309405	0	+		2.29977	0.0488499	0	+		0.964365	0.348728	3	+
sp|Q9CVB6|ARPC2_MOUSE	Arpc2	Actin-related protein 2/3 complex subunit 2 OS=Mus musculus GN=Arpc2 PE=1 SV=3	75.038	1	0	17.33	34357	23	5	5	5	5	14	14	10.9426	12.6696	10.4455	11.1374	14.2254	16.4172	16.1564	11.9882	10.4071	13.3798	11.1837	10.2934	12.5435	13.2049	11.729	0.0172593	0.984668	6	+		-2.20435	0.142174	0	+		3.39806	0.0240493	3	+		1.17644	0.256742	3	+
sp|Q9JM76|ARPC3_MOUSE	Arpc3	Actin-related protein 2/3 complex subunit 3 OS=Mus musculus GN=Arpc3 PE=1 SV=3	72.435	1	0	19.66	20525	12	3	3	4	4	8	8	10.5982	9.99847	10.4455	10.6507	10.7898	15.0472	15.2939	11.9882	9.13483	10.785	10.5808	10.2934	12.671	11.0634	11.3406	-0.224678	0.592191	2			-1.58813	0.304511	0	+		2.85659	0.0447482	2	+		1.49314	0.0558562	0
sp|P59999|ARPC4_MOUSE	Arpc4	Actin-related protein 2/3 complex subunit 4 OS=Mus musculus GN=Arpc4 PE=1 SV=3	100.502	1	0	23.21	19667	14	4	4	4	4	15	15	14.0097	14.0655	10.5636	10.1292	10.1913	17.0664	17.1979	11.8095	13.1432	13.8762	11.5318	10.1658	10.8596	12.6985	11.8885	-0.0127168	0.992811	2.5	+		-2.25072	0.348549	0	+		1.8743	0.405297	0	+		-0.363698	0.749772	2.5	+
sp|Q9CPW4|ARPC5_MOUSE	Arpc5	Actin-related protein 2/3 complex subunit 5 OS=Mus musculus GN=Arpc5 PE=1 SV=3	10.811	1	0	7.95	16288	12	1	1	1	1	1	1	10.5982	11.1653	10.4455	10.6507	10.7898	14.6941	14.2521	13.7556	9.78629	11.7518	10.5493	10.2934	13.5645	13.2017	11.3406	-0.119677	0.797076	24	+		-0.670652	0.598061	0	+		2.65802	0.0250539	11	+	+	2.10705	0.039011	13	+	+
sp|O54984|ASNA_MOUSE	Asna1	ATPase Asna1 OS=Mus musculus GN=Asna1 PE=1 SV=2	68.404	1	0	9.2	38823	15	3	3	3	3	6	6	11.3636	13.303	10.4455	11.4307	10.7898	10.8819	10.9778	11.9882	14.8035	11.2177	10.5808	10.2934	10.8596	11.0634	11.3406	0.0881858	0.944009	0	+		-0.0715748	0.846031	2.5			-0.476237	0.498454	1.5	+		-0.635997	0.630251	1	+
sp|Q8BSY0|ASPH_MOUSE	Asph	Aspartyl/asparaginyl beta-hydroxylase OS=Mus musculus GN=Asph PE=1 SV=1	180.367	1	0	6.88	83042	34	5	5	5	5	14	14	10.5982	14.2528	10.4455	10.6507	11.7445	10.8819	10.9778	11.9882	9.13483	13.3133	10.5808	10.2934	11.5965	11.0634	11.3406	-0.656162	0.626131	89			-0.064616	0.861013	14.8333			-0.0886459	0.929674	47.5			0.5029	0.653569	56.3333
sp|Q925I1|ATAD3_MOUSE	Atad3	ATPase family AAA domain-containing protein 3 OS=Mus musculus GN=Atad3 PE=1 SV=1	48.988	1	0	2.37	66742	40	1	1	1	1	1	1	10.5982	9.99847	10.4455	10.6507	10.7898	10.8819	10.9778	11.9882	9.13483	12.2687	10.5808	10.2934	10.8596	11.0634	11.3406	0.146239	0.832898	23.5			-0.0715748	0.846031	0			0.736253	0.0585291	8.83333			0.518439	0.532787	14.6667
sp|Q9Z2A5|ATE1_MOUSE	Ate1	Arginyl-tRNA--protein transferase 1 OS=Mus musculus GN=Ate1 PE=1 SV=2	33.228	1	0	2.33	59146	23	1	1	1	1	7	7	12.4151	10.0261	12.1283	10.6531	10.7898	10.8819	10.9778	11.9882	11.218	11.2345	11.7529	10.6301	10.8596	11.0634	11.3406	-0.0967741	0.880952	6.83333	+		-0.0715748	0.846031	0			-0.146183	0.826723	3.66667	+		-0.120984	0.699156	3.16667	+
sp|Q8C0J2|A16L1_MOUSE	Atg16l1	Autophagy-related protein 16-1 OS=Mus musculus GN=Atg16l1 PE=1 SV=1	58.103	1	0	6.1	68172	37	2	2	2	2	13	13	10.5396	10.2694	14.1215	10.6507	10.7898	10.8819	11.3478	11.9882	12.9176	10.785	12.7979	10.2934	10.8596	11.3787	11.3406	0.303177	0.798524	4.33333	+		-0.0589629	0.873951	0			-0.143371	0.885295	0	+		-0.505511	0.561517	4.33333	+
sp|Q99J83|ATG5_MOUSE	Atg5	Autophagy protein 5 OS=Mus musculus GN=Atg5 PE=1 SV=1	13.476	1	0	5.45	32402	16	1	1	1	1	1	1	10.5982	9.99847	12.3486	10.6507	10.7898	10.8819	10.9778	11.9882	10.9448	10.785	12.3108	10.2934	10.8596	11.0634	11.3406	0.184531	0.790653	23.1667	+		-0.0715748	0.846031	0			0.260464	0.66766	12.5			0.00435736	0.993689	10.6667	+
sp|Q9CWJ9|PUR9_MOUSE	Atic	Bifunctional purine biosynthesis protein PURH OS=Mus musculus GN=Atic PE=1 SV=2	15.041	1	0	1.86	64217	36	1	1	1	1	1	1	12.086	9.99847	10.4455	10.6507	10.7898	10.8819	10.9778	11.9882	9.15997	10.6387	10.5808	10.2934	10.8596	11.0634	11.3406	-0.626909	0.311803	1	+		-0.0715748	0.846031	0			0.364305	0.517932	1			0.919639	0.082212	0	+
sp|Q9QZW0|AT11C_MOUSE	Atp11c	Phospholipid-transporting ATPase 11C OS=Mus musculus GN=Atp11c PE=1 SV=2	15.603	1	0	2.48	129240	56	2	2	2	2	2	2	10.5982	13.51	10.4455	10.6507	10.7898	10.8819	10.9778	11.9882	9.13483	13.5476	10.5808	10.2934	10.8596	11.0634	11.3406	-0.411913	0.741989	6.5			-0.0715748	0.846031	0			-0.141628	0.863377	5.5			0.19871	0.865891	1
sp|Q9Z1W8|AT12A_MOUSE	Atp12a	Potassium-transporting ATPase alpha chain 2 OS=Mus musculus GN=Atp12a PE=1 SV=3	101.793	1	0	2.8	114727	52	3	1	4	1	20	4	13.5733	16.3779	12.4955	10.3603	13.7129	12.7357	12.6107	11.9882	12.5883	17.5178	12.7896	10.0566	12.7221	12.7183	11.456	0.0363391	0.986072	1.33333	+		-0.463073	0.438142	0	+		-0.439859	0.746891	1.33333	+		-0.939271	0.637638	0	+
sp|Q8VDN2|AT1A1_MOUSE	Atp1a1	Sodium/potassium-transporting ATPase subunit alpha-1 OS=Mus musculus GN=Atp1a1 PE=1 SV=1	1634.87	1	4	50.73	112982	53	41	39	45	42	303	287	15.5643	21.2933	14.6165	16.817	16.1381	17.1777	17.7087	14.2693	16.1928	21.0722	16.028	16.4229	15.2939	16.6216	16.8283	0.356188	0.858506	10.8333	+		-0.0755179	0.941768	1	+		-0.749354	0.667652	3.5	+		-1.18106	0.465382	8.33333	+
sp|P14094|AT1B1_MOUSE	Atp1b1	Sodium/potassium-transporting ATPase subunit beta-1 OS=Mus musculus GN=Atp1b1 PE=1 SV=1	185.883	1	0	24.34	35195	16	6	6	6	6	33	33	10.5982	18.4305	10.4455	10.6507	13.2814	13.8653	13.8509	11.9882	13.1327	17.854	10.5808	10.2934	11.5177	12.171	11.3406	0.43402	0.874473	3	+		-1.57004	0.0384669	0	+		0.715251	0.734852	1	+		-1.28881	0.562906	2	+
sp|P97370|AT1B3_MOUSE	Atp1b3	Sodium/potassium-transporting ATPase subunit beta-3 OS=Mus musculus GN=Atp1b3 PE=1 SV=1	36.148	1	0	7.55	31776	15	2	2	2	2	2	2	10.5982	13.9176	10.4455	10.6507	10.7898	10.8819	10.9778	11.9882	9.13483	14.1085	10.5808	10.2934	10.8596	11.0634	11.3406	-0.373581	0.79309	7.66667			-0.0715748	0.846031	0			-0.243523	0.792294	3.5			0.0584826	0.965185	4.16667
sp|O55143|AT2A2_MOUSE	Atp2a2	Sarcoplasmic/endoplasmic reticulum calcium ATPase 2 OS=Mus musculus GN=Atp2a2 PE=1 SV=2	1403.65	1	1	45.79	114858	53	37	30	44	36	331	236	15.9858	19.9019	16.8659	14.5674	15.3998	18.9914	20.0574	19.2877	17.0207	20.2675	17.0167	15.9617	16.5772	18.7034	17.8618	0.73637	0.633038	34.6667	+		-0.719924	0.61168	38.5	+		1.60379	0.335386	50.6667	+		0.147498	0.908501	22.5	+
sp|Q64518|AT2A3_MOUSE	Atp2a3	Sarcoplasmic/endoplasmic reticulum calcium ATPase 3 OS=Mus musculus GN=Atp2a3 PE=1 SV=3	334.739	1	0	10.79	113638	54	8	1	9	1	98	3	10.5982	11.9878	10.4455	10.6507	10.7898	10.8819	10.9778	11.9882	9.13483	12.4666	10.5808	10.2934	10.8596	11.0634	11.3406	-0.301615	0.711665	1.66667			-0.0715748	0.846031	0			0.238923	0.617693	0			0.468963	0.594508	1.66667
sp|G5E829|AT2B1_MOUSE	Atp2b1	Plasma membrane calcium-transporting ATPase 1 OS=Mus musculus GN=Atp2b1 PE=1 SV=1	129.943	1	2	4.18	134747	65	4	4	4	4	10	10	11.1249	14.2084	10.4455	10.6507	10.7898	10.8819	10.9778	11.9882	9.1687	14.6551	10.5808	10.2934	10.8596	11.0634	11.3406	-0.432848	0.780766	3	+		-0.0715748	0.846031	0			-0.447898	0.644278	2	+		-0.0866251	0.953852	1	+
sp|Q03265|ATPA_MOUSE	Atp5a1	ATP synthase subunit alpha, mitochondrial OS=Mus musculus GN=Atp5a1 PE=1 SV=1	1358.82	1	0	61.48	59753	36	33	33	37	37	434	434	15.8033	21.7115	15.9384	13.3034	16.8419	18.9705	16.6334	16.7213	17.9627	22.1125	16.3475	14.8616	17.5036	17.9298	16.3182	1.13194	0.649825	11.8333	+		-0.0412745	0.959691	23.5	+		0.602655	0.757768	27.3333	+		-0.570559	0.775398	8	+
sp|P56480|ATPB_MOUSE	Atp5b	ATP synthase subunit beta, mitochondrial OS=Mus musculus GN=Atp5b PE=1 SV=2	1676.44	1	0	81.1	56300	30	30	30	43	43	585	585	14.0058	21.5071	16.5204	14.6859	16.3302	18.1498	17.2379	15.848	18.3976	21.5955	17.423	16.3226	15.7281	17.2342	15.1772	1.75487	0.422661	30.1667	+		-0.844958	0.334738	62.5	+		0.211642	0.908685	56	+		-2.38818	0.15784	36.6667	+
sp|Q91VR2|ATPG_MOUSE	Atp5c1	ATP synthase subunit gamma, mitochondrial OS=Mus musculus GN=Atp5c1 PE=1 SV=1	206.252	1	0	41.61	32886	16	10	10	10	10	55	55	13.9936	18.103	14.1869	15.3337	14.681	15.8013	15.0081	14.1913	13.7808	18.7194	14.2571	14.7109	15.7606	15.3483	14.9825	-0.0372357	0.980704	28.3333	+		0.443375	0.361984	3.5	+		-0.483872	0.647406	14.1667	+		-0.00326077	0.998172	17.6667	+
sp|Q9D3D9|ATPD_MOUSE	Atp5d	ATP synthase subunit delta, mitochondrial OS=Mus musculus GN=Atp5d PE=1 SV=1	113.106	1	0	13.69	17600	7	2	2	2	2	11	11	10.9672	17.415	10.4455	10.6507	15.0901	11.9432	14.0463	11.9882	13.0555	18.5831	10.5808	10.2934	12.7861	12.0337	11.3406	0.758645	0.776576	0	+		-1.21347	0.273951	1	+		0.897376	0.646121	0	+		-1.07474	0.659918	1	+
sp|Q9CQQ7|AT5F1_MOUSE	Atp5f1	ATP synthase F(0) complex subunit B1, mitochondrial OS=Mus musculus GN=Atp5f1 PE=1 SV=1	148.748	1	0	30.86	28949	18	7	7	7	7	28	28	10.5982	18.3415	10.4455	10.6507	10.7898	15.235	10.9778	13.8122	13.9322	18.87	10.6388	10.5296	14.192	15.3997	14.3714	0.98369	0.733736	3	+		1.95067	0.201942	0	+		0.19478	0.93323	3	+		1.16176	0.640435	0	+
sp|Q9DCX2|ATP5H_MOUSE	Atp5h	ATP synthase subunit d, mitochondrial OS=Mus musculus GN=Atp5h PE=1 SV=3	208.339	1	0	59.01	18749	12	8	8	8	8	38	38	10.5982	17.3767	10.4455	11.4192	12.1985	11.7916	10.9778	11.9882	12.7402	18.2643	10.5808	11.3557	10.8596	11.1644	11.3406	0.77533	0.75724	22.3333	+		-0.617492	0.12644	0	+		-0.720858	0.681829	10.5	+		-2.11368	0.351067	11.8333	+
sp|Q06185|ATP5I_MOUSE	Atp5i	ATP synthase subunit e, mitochondrial OS=Mus musculus GN=Atp5i PE=1 SV=2	66.484	1	0	43.66	8236	4	3	3	3	3	10	10	10.5982	15.3236	9.88716	12.5645	10.7898	11.0454	10.9778	11.9882	12.6538	15.3883	10.5808	12.9679	10.9197	10.9874	11.3406	0.804312	0.625693	9.16667	+		-0.117734	0.73997	0	+		-0.893067	0.50038	4	+		-1.81511	0.181575	5.16667	+
sp|P56135|ATPK_MOUSE	Atp5j2	ATP synthase subunit f, mitochondrial OS=Mus musculus GN=Atp5j2 PE=1 SV=3	52.367	1	0	26.14	10344	4	2	2	2	2	3	3	10.5982	14.8704	10.4455	10.6507	10.7898	10.8819	10.9778	11.9882	9.75976	11.8131	10.5808	10.2934	12.6553	11.0634	11.3406	-1.02939	0.409711	3.33333	+		0.526963	0.363192	0			-0.481728	0.680219	1			1.07463	0.163673	2.33333	+
sp|Q9CPQ8|ATP5L_MOUSE	Atp5l	ATP synthase subunit g, mitochondrial OS=Mus musculus GN=Atp5l PE=1 SV=1	17.103	1	0	14.56	11425	6	1	1	1	1	1	1	10.5982	14.5044	10.4455	10.6507	10.7898	10.8819	10.9778	11.9882	9.13483	11.5276	10.5808	10.2934	10.8596	11.0634	11.3406	-1.16552	0.331014	2.5			-0.0715748	0.846031	0			-0.390232	0.716416	1.5			0.703715	0.28989	1
sp|Q9DB20|ATPO_MOUSE	Atp5o	ATP synthase subunit O, mitochondrial OS=Mus musculus GN=Atp5o PE=1 SV=1	256.888	1	0	54.46	23364	14	8	8	9	9	47	47	12.7799	18.2189	10.9893	10.6507	10.7898	14.5895	16.5015	13.3588	14.5273	18.4506	11.3767	12.0239	11.2431	12.6128	11.3406	0.934953	0.707224	6	+		-2.07777	0.214774	0	+		0.650232	0.769406	6	+		-2.36249	0.275961	0	+
sp|Q9CYN9|RENR_MOUSE	Atp6ap2	Renin receptor OS=Mus musculus GN=Atp6ap2 PE=1 SV=2	7.427	1	0	2.29	39092	17	1	1	1	1	1	1	10.5982	13.2325	10.4455	10.6507	10.7898	10.999	10.9778	11.9882	9.13483	14.135	10.5808	10.2934	10.8596	11.0634	11.3406	-0.195688	0.882541	4.5	+		-0.100846	0.779175	0			-0.0429851	0.954399	1			0.0518572	0.969306	3.5	+
sp|Q9Z1G4|VPP1_MOUSE	Atp6v0a1	V-type proton ATPase 116 kDa subunit a isoform 1 OS=Mus musculus GN=Atp6v0a1 PE=1 SV=3	187.675	1	0	12.63	96467	39	7	7	7	7	27	27	10.5982	15.9367	10.4455	10.6507	10.7898	10.8819	10.9778	11.9882	9.04052	14.9085	11.9197	10.2934	11.2769	14.3737	11.3406	-0.36722	0.849008	8	+		1.17097	0.257432	0	+		-0.748301	0.605223	4			0.789887	0.666542	4	+
sp|P63082|VATL_MOUSE	Atp6v0c	V-type proton ATPase 16 kDa proteolipid subunit OS=Mus musculus GN=Atp6v0c PE=1 SV=1	38.602	1	0	20	15808	4	1	1	1	1	1	1	10.5982	12.6926	10.4455	10.6507	10.7898	10.8819	10.9778	11.9882	9.13483	10.785	10.5808	10.2934	10.8596	11.0634	11.3406	-0.898219	0.215428	16.5			-0.0715748	0.846031	0			0.0627119	0.920457	2			0.889357	0.105937	14.5
sp|P51863|VA0D1_MOUSE	Atp6v0d1	V-type proton ATPase subunit d 1 OS=Mus musculus GN=Atp6v0d1 PE=1 SV=2	87.908	1	0	11.11	40301	17	4	4	4	4	11	11	10.9876	15.9307	11.3961	10.6507	10.7898	10.8819	10.9778	11.9882	12.4601	14.9815	10.5808	10.2934	11.6399	11.0634	13.5636	-0.1623	0.924571	42.6667	+		0.929484	0.249344	6.66667	+		-1.08182	0.427066	14	+		0.00996281	0.994696	35.3333	+
sp|P50516|VATA_MOUSE	Atp6v1a	V-type proton ATPase catalytic subunit A OS=Mus musculus GN=Atp6v1a PE=1 SV=2	30.895	1	0	2.43	68326	38	1	1	1	1	6	6	10.5982	12.2925	10.4455	10.6507	10.7898	10.8819	10.9778	11.9882	9.13483	12.4138	10.5808	10.2934	10.8596	11.0634	11.3406	-0.39098	0.64475	5			-0.0715748	0.846031	0			0.162744	0.763142	2			0.482149	0.578369	3
sp|P62814|VATB2_MOUSE	Atp6v1b2	V-type proton ATPase subunit B, brain isoform OS=Mus musculus GN=Atp6v1b2 PE=1 SV=1	67.512	1	0	5.09	56551	29	2	2	2	2	3	3	12.0208	13.1498	10.4455	10.6507	12.7184	10.8819	10.9383	11.9882	11.0877	13.6465	10.5853	10.2934	10.8596	11.2947	11.3406	-0.163432	0.874721	2.33333	+		-0.466721	0.426277	0	+		0.0650332	0.935641	1	+		-0.238256	0.804911	1.33333	+
sp|Q8BVE3|VATH_MOUSE	Atp6v1h	V-type proton ATPase subunit H OS=Mus musculus GN=Atp6v1h PE=1 SV=1	208.379	1	0	20.5	55855	27	7	7	8	8	51	51	13.6804	14.0461	15.3912	10.6507	11.0762	13.9094	14.108	12.6084	15.306	13.9658	14.8936	11.5685	10.8596	11.0634	13.9868	0.491378	0.719319	2	+		-0.955543	0.456177	3.5	+		-0.516609	0.687042	4	+		-1.96353	0.191792	1.5	+
sp|O35143|ATIF1_MOUSE	Atpif1	ATPase inhibitor, mitochondrial OS=Mus musculus GN=Atpif1 PE=1 SV=2	45.806	1	0	23.58	12159	6	3	3	3	3	6	6	10.5982	14.3507	10.4455	10.6507	10.7898	10.8819	10.9778	11.9882	8.8531	15.1828	10.5808	10.2934	10.8596	11.0634	11.3406	-0.283703	0.870453	6.33333	+		-0.0715748	0.846031	0			-0.351793	0.733892	3.33333			-0.139664	0.934923	3	+
sp|P28658|ATX10_MOUSE	Atxn10	Ataxin-10 OS=Mus musculus GN=Atxn10 PE=1 SV=2	271.132	1	0	28	53707	31	12	12	12	12	55	55	17.2538	15.4961	14.8839	11.1221	10.7898	10.8819	10.9778	12.7788	16.6889	15.703	14.7733	13.9808	10.8596	11.0634	11.3406	0.597553	0.687958	14.3333	+		-0.269221	0.659076	11.5			-3.33186	0.0516973	14.5	+		-4.19864	0.00187371	11.3333	+	+
sp|O70305|ATX2_MOUSE	Atxn2	Ataxin-2 OS=Mus musculus GN=Atxn2 PE=1 SV=1	34.101	1	0	3.66	136485	56	3	3	3	3	8	8	14.9086	12.0127	13.0203	10.6507	11.1299	10.8819	11.6398	11.9882	13.1632	12.1379	13.2495	10.0557	10.852	11.0634	11.3406	-0.496477	0.684645	1	+		-0.324623	0.3536	0	+		-1.23808	0.231595	0	+		-1.06622	0.283099	1	+
sp|Q7TQH0|ATX2L_MOUSE	Atxn2l	Ataxin-2-like protein OS=Mus musculus GN=Atxn2l PE=1 SV=1	92.613	1	0	6.77	110649	43	6	6	6	6	27	27	16.2751	13.6646	15.414	12.7379	15.7753	13.7319	11.218	12.9842	16.0416	14.7411	15.317	13.0123	17.4268	12.634	11.1924	0.255107	0.813093	58.6667	+		0.323778	0.873466	157.333	+		-1.09557	0.411185	161.5	+		-1.0269	0.583264	54.5	+
sp|O70126|AURKB_MOUSE	Aurkb	Aurora kinase B OS=Mus musculus GN=Aurkb PE=1 SV=2	13.249	1	0	3.48	39384	21	1	1	1	1	2	2	11.7283	9.49173	10.4455	10.6507	10.8753	10.8819	10.9778	11.9882	9.96778	10.3064	10.5808	10.2934	10.7815	11.0634	11.3406	-0.291938	0.561891	5	+		-0.118979	0.745637	0			0.601757	0.301544	1.66667	+		0.774717	0.0118573	3.33333	+
sp|Q9D9K3|AVEN_MOUSE	Aven	Cell death regulator Aven OS=Mus musculus GN=Aven PE=1 SV=2	60.072	1	0	15.79	37195	22	3	3	3	3	11	11	12.0568	9.99847	10.4455	10.6507	10.7898	10.8819	10.9778	11.9882	9.9706	10.785	10.5808	10.2934	10.8596	11.0634	11.3406	-0.380378	0.456791	9			-0.0715748	0.846031	0			0.37161	0.505313	6.33333			0.680414	0.036367	2.66667
sp|P01887|B2MG_MOUSE	B2m	Beta-2-microglobulin OS=Mus musculus GN=B2m PE=1 SV=2	29.91	1	0	7.56	13779	8	1	1	1	1	3	3	10.5982	13.5329	12.1397	11.7314	10.7898	11.432	10.9778	11.9882	11.1228	13.5285	12.0424	10.2934	12.4305	11.7595	11.3406	-0.253768	0.792063	2	+		0.546559	0.24266	0	+		-0.703573	0.328882	1	+		0.0967535	0.914993	1	+
sp|Q91YN9|BAG2_MOUSE	Bag2	BAG family molecular chaperone regulator 2 OS=Mus musculus GN=Bag2 PE=1 SV=1	17.565	1	0	5.24	23474	16	1	1	1	1	1	1	11.4265	9.99847	10.4455	10.6507	10.7898	10.8819	10.9778	11.9882	11.2383	10.785	10.5808	10.2934	10.8596	11.0634	11.3406	0.0941294	0.801639	2			-0.0715748	0.846031	0			0.529187	0.242636	2			0.363482	0.224774	0
sp|Q9JLV1|BAG3_MOUSE	Bag3	BAG family molecular chaperone regulator 3 OS=Mus musculus GN=Bag3 PE=1 SV=2	651.009	1	0	39.17	61860	39	16	16	18	18	127	127	15.0489	12.3956	16.9908	14.3201	11.1147	10.8819	12.3909	11.9882	17.5357	12.8668	16.7406	14.1947	12.1452	12.0845	12.7267	0.645602	0.670577	19.3333	+		0.724859	0.172427	0	+		-3.0949	0.0224943	7.33333	+	+	-3.01564	0.067921	12	+
sp|Q9Z1R2|BAG6_MOUSE	Bag6	Large proline-rich protein BAG6 OS=Mus musculus GN=Bag6 PE=1 SV=1	722.806	1	0	30.94	121037	38	24	24	27	27	170	170	18.8398	17.7402	11.5561	13.7135	13.8747	11.2147	11.2017	13.6271	18.8168	17.6292	13.3464	15.4703	11.154	12.095	15.9957	0.853288	0.697267	12.5	+		0.602035	0.707508	0	+		-2.98283	0.159458	7.5	+		-3.23408	0.148138	5	+
sp|O54962|BAF_MOUSE	Banf1	Barrier-to-autointegration factor OS=Mus musculus GN=Banf1 PE=1 SV=1	70.698	1	0	48.31	10103	8	3	3	3	3	5	5	15.0941	14.0638	13.8202	11.6499	11.0337	10.8819	10.9778	11.9882	15.1229	11.1163	10.5808	10.2934	10.8596	12.1587	11.3406	-1.87863	0.210506	12.5	+		0.232557	0.619845	0			-2.43658	0.0192863	3	+		-0.325394	0.821893	9.5	+
sp|Q9R069|BCAM_MOUSE	Bcam	Basal cell adhesion molecule OS=Mus musculus GN=Bcam PE=1 SV=1	297.063	1	0	20.58	67670	36	9	9	9	9	33	33	11.3961	17.4505	15.9	14.5876	14.818	17.8069	18.4048	11.7434	19.3433	16.9582	18.1318	12.221	17.2038	18.2257	16.5211	1.83004	0.400132	0	+		1.62356	0.4227	2.66667	+		0.859751	0.682449	1	+		0.653273	0.74373	1.66667	+
sp|Q61335|BAP31_MOUSE	Bcap31	B-cell receptor-associated protein 31 OS=Mus musculus GN=Bcap31 PE=1 SV=4	194.311	1	0	22.04	27957	15	8	8	9	9	35	35	11.6119	16.4094	9.96132	9.96386	9.8561	11.8484	11.6197	11.9882	10.6795	17.6743	9.57786	10.2934	11.2819	10.5575	10.3133	0.0696443	0.978025	8.5	+		-0.610548	0.381079	0	+		-0.658518	0.695569	5.5	+		-1.33871	0.577003	3	+
sp|P59017|B2L13_MOUSE	Bcl2l13	Bcl-2-like protein 13 OS=Mus musculus GN=Bcl2l13 PE=1 SV=2	37.698	1	0	2.53	46719	18	1	1	1	1	6	6	10.5982	10.5081	10.4455	10.6507	10.7898	10.8819	10.9778	11.9882	9.13483	12.6644	10.5808	10.2934	10.8596	11.0634	11.3406	0.117755	0.878218	7.66667			-0.0715748	0.846031	0			0.608844	0.0746807	0			0.419514	0.652775	7.66667
sp|Q8K019|BCLF1_MOUSE	Bclaf1	Bcl-2-associated transcription factor 1 OS=Mus musculus GN=Bclaf1 PE=1 SV=2	232.391	1	0	15.56	106002	49	13	12	13	12	76	70	14.0709	13.085	13.5185	10.6507	19.0843	18.017	17.1534	17.6647	12.9444	15.4227	13.7506	12.1697	18.0655	17.5359	16.8217	0.740573	0.497789	9.5	+		-0.505485	0.415622	0	+		5.14859	0.000963336	2	+		3.90254	0.00671167	7.5	+	+
sp|Q9R224|BEX1_MOUSE	Bex1	Protein BEX1 OS=Mus musculus GN=Bex1 PE=1 SV=2	24.052	1	0	9.38	15119	10	1	1	1	1	4	4	10.5982	9.99847	12.9326	10.6507	10.7898	10.8819	10.9778	11.9882	9.13483	10.785	12.0828	10.2934	10.8596	11.0634	11.3406	-0.470954	0.615307	3			-0.0715748	0.846031	0			0.114478	0.876156	2			0.513857	0.513777	1
sp|Q9CWT2|BEX4_MOUSE	Bex4	Protein BEX4 OS=Mus musculus GN=Bex4 PE=3 SV=1	20.951	1	0	11.02	13820	8	1	1	1	1	3	3	10.5982	8.71665	12.5877	10.6507	10.7898	10.8819	10.9778	11.9882	9.13483	10.785	11.1177	10.2934	10.8596	11.0634	11.3406	-0.305571	0.746181	12	+		-0.0715748	0.846031	0			0.52115	0.556914	7	+		0.755146	0.210765	5
sp|Q6PB60|BHLH9_MOUSE	Bhlhb9	Protein BHLHb9 OS=Mus musculus GN=Bhlhb9 PE=2 SV=1	45.906	1	0	4.27	59823	31	2	2	2	2	5	5	10.8826	10.2082	13.0153	10.6368	10.7898	10.8819	10.9778	11.9882	9.75582	10.5658	12.2075	10.2934	10.8596	11.0634	11.3406	-0.480072	0.578993	3.66667	+		-0.0715748	0.846031	0			-0.0262699	0.970649	3.66667	+		0.382228	0.573876	0	+
sp|Q99MQ1|BICC1_MOUSE	Bicc1	Protein bicaudal C homolog 1 OS=Mus musculus GN=Bicc1 PE=1 SV=1	30.351	1	0	1.43	105037	45	1	1	2	2	9	9	9.51757	9.99847	10.4455	10.6507	10.6241	10.8819	10.9778	11.9882	10.018	10.4339	10.5808	10.2934	10.8596	11.0634	11.3406	0.178495	0.545781	4.5	+		-0.0301529	0.938721	0			0.964985	0.0487165	1.5			0.756338	0.00917779	3	+
sp|Q8R016|BLMH_MOUSE	Blmh	Bleomycin hydrolase OS=Mus musculus GN=Blmh PE=1 SV=1	1480.14	1	0	79.56	52511	29	32	32	46	46	251	251	14.5495	20.4874	14.1677	20.906	19.8127	15.6097	15.2699	12.3159	14.8849	18.578	14.9894	22.0091	18.9419	16.2249	16.7796	0.0877059	0.973137	44.1667	+		1.56341	0.4596	41.3333	+		-1.7756	0.486608	60.3333	+		-0.299895	0.893278	25.1667	+
sp|Q923D2|BLVRB_MOUSE	Blvrb	Flavin reductase (NADPH) OS=Mus musculus GN=Blvrb PE=1 SV=3	112.536	1	0	36.41	22197	13	5	5	5	5	11	11	10.3111	13.783	15.6856	14.2734	10.7898	12.9342	12.4386	11.9882	12.1806	12.3496	15.173	13.4802	10.8596	16.1843	11.3406	-0.217405	0.875792	1	+		0.757159	0.640094	0	+		-1.47555	0.275411	1	+		-0.500984	0.772271	0	+
sp|P28028|BRAF_MOUSE	Braf	Serine/threonine-protein kinase B-raf OS=Mus musculus GN=Braf PE=1 SV=3	61.472	1	0	5.47	88780	42	4	1	4	1	9	1	25.6176	24.4435	25.6744	26.8464	24.5627	26.22	26.214	26.1992	22.9784	24.904	25.6676	25.9235	25.7533	26.1431	26.6078	-0.777101	0.383849	1	+		0.36912	0.516891	0	+		0.153484	0.81866	1	+		1.29971	0.1716	0	+
sp|Q8BXV2|BRI3B_MOUSE	Bri3bp	BRI3-binding protein OS=Mus musculus GN=Bri3bp PE=1 SV=1	14.404	1	0	5.53	28263	10	1	1	1	1	1	1	10.5982	13.1991	10.4455	11.3409	10.7898	10.8819	10.9778	11.9882	9.13483	14.1157	10.5808	10.2934	10.8596	11.0634	11.3406	-0.364712	0.779728	30.6667	+		-0.0715748	0.846031	0			-0.236458	0.743828	11.8333	+		0.0566796	0.966311	18.8333
sp|Q921C3|BRWD1_MOUSE	Brwd1	Bromodomain and WD repeat-containing protein 1 OS=Mus musculus GN=Brwd1 PE=1 SV=2	11.169	1	0	1	259228	124	1	1	1	1	1	1	15.0335	11.7494	15.085	13.8723	19.5792	13.0626	13.7998	11.9882	13.0626	11.6905	13.9821	12.8841	10.8596	14.6793	16.4668	-1.03025	0.301525	1	+		-0.605536	0.813863	24.3333	+		0.672403	0.731375	12.5	+		1.09711	0.495035	12.8333	+
sp|Q80Y55|BSDC1_MOUSE	Bsdc1	BSD domain-containing protein 1 OS=Mus musculus GN=Bsdc1 PE=1 SV=1	34.493	1	0	9.13	46953	20	4	4	4	4	9	9	10.0688	12.4721	10.4455	10.6507	10.7898	10.8819	10.9778	11.9882	14.6353	10.785	10.5808	10.2934	10.8596	11.0634	11.3406	0.664399	0.586529	2.33333	+		-0.0715748	0.846031	0			0.250206	0.692648	1.33333	+		-0.485767	0.706715	1
sp|P18572|BASI_MOUSE	Bsg	Basigin OS=Mus musculus GN=Bsg PE=1 SV=2	329.15	1	0	22.62	42445	20	9	9	9	9	55	55	10.5982	20.0747	15.6402	10.6507	14.9677	13.6366	14.0506	11.9882	15.061	20.2949	11.0119	10.2934	13.4795	13.3758	12.1081	-0.0756465	0.982094	11.5	+		-0.672961	0.451406	0	+		-0.580164	0.81397	6	+		-1.17748	0.68556	5.5	+
sp|Q8R2Q8|BST2_MOUSE	Bst2	Bone marrow stromal antigen 2 OS=Mus musculus GN=Bst2 PE=1 SV=1	13.061	1	0	5.81	19152	10	1	1	1	1	1	1	11.4647	11.2798	10.7218	10.6507	10.796	10.8819	10.9778	11.9882	10.1344	12.3608	10.9009	9.64808	11.0391	11.0634	11.3406	-0.268159	0.683269	0	+		-0.0133177	0.970183	2.5			0.131792	0.714755	2.5	+		0.386633	0.607245	0	+
sp|Q80X66|BTBDA_MOUSE	Btbd10	BTB/POZ domain-containing protein 10 OS=Mus musculus GN=Btbd10 PE=1 SV=1	17.892	1	0	1.89	53772	25	1	1	1	1	1	1	10.5982	13.429	11.4241	10.6507	13.0854	14.3766	15.2475	13.707	9.13483	15.0717	11.8482	10.2934	14.6557	12.9403	11.3406	0.0615672	0.967462	12.5	+		-1.12526	0.298645	0	+		2.57866	0.0188094	4	+		1.39183	0.45548	8.5	+
sp|Q9WVA3|BUB3_MOUSE	Bub3	Mitotic checkpoint protein BUB3 OS=Mus musculus GN=Bub3 PE=1 SV=2	315.915	1	0	38.34	36955	16	10	10	11	11	51	51	13.6311	12.9485	16.7967	18.6485	13.8879	14.2501	13.793	15.682	13.7618	13.0317	16.4401	18.5387	13.2484	12.1837	14.4692	-0.0630945	0.973818	7.33333	+		-1.10282	0.204962	0	+		-1.10295	0.464144	4	+		-2.14268	0.237156	3.33333	+
sp|Q2L4X1|BZW2_MUSMM	Bzw2	Basic leucine zipper and W2 domain-containing protein 2 OS=Mus musculus molossinus GN=Bzw2 PE=2 SV=1	52.732	2	1	10.02	48063	31	5	5	5	5	16	16	13.8703	9.85352	10.4455	10.7259	10.2639	10.8819	10.9778	14.6388	15.0872	10.785	10.5808	11.3782	10.8596	11.0634	11.3406	0.734012	0.616036	1	+		-0.602729	0.632234	1	+		0.466814	0.739907	1	+		-0.869926	0.519324	1	+
sp|O35658|C1QBP_MOUSE	C1qbp	Complement component 1 Q subcomponent-binding protein, mitochondrial OS=Mus musculus GN=C1qbp PE=1 SV=1	103.492	1	0	24.82	31013	15	3	3	3	3	8	8	10.5982	13.6286	11.1558	12.9656	10.7898	11.7928	12.4218	12.4051	9.88561	14.5622	10.5808	12.6144	10.8596	12.3027	11.3406	-0.176278	0.894882	1	+		-0.351408	0.568363	0	+		-0.234647	0.783417	0	+		-0.409778	0.765249	1	+
sp|P01027|CO3_MOUSE	C3	Complement C3 OS=Mus musculus GN=C3 PE=1 SV=3	895.022	1	1	20.75	186484	114	29	29	30	30	416	416	17.7881	19.1331	20.2677	19.0314	17.5165	20.5306	20.713	18.3728	17.3713	18.7123	19.9491	18.2232	18.0254	20.2099	18.025	-0.491086	0.531287	17.1667	+		-0.529784	0.655838	0	+		0.228162	0.81655	7.5	+		0.189465	0.83832	9.66667	+
sp|P01029|CO4B_MOUSE	C4b	Complement C4-B OS=Mus musculus GN=C4b PE=1 SV=3	147.533	1	2	4.26	192915	94	4	4	4	4	20	20	12.141	13.5474	13.5902	15.4554	10.7898	15.0546	15.2186	13.6891	11.9808	10.785	14.2043	14.8353	12.9475	12.5028	15.3548	-0.732179	0.553007	4	+		-0.0863521	0.953912	0	+		0.00450091	0.997199	1.5	+		0.650327	0.648719	2.5	+
sp|P06684|CO5_MOUSE	C5	Complement C5 OS=Mus musculus GN=C5 PE=1 SV=2	233.42	1	1	7.5	188878	93	12	12	12	12	38	38	18.1609	13.336	13.7549	13.8654	16.7364	15.0933	15.8655	15.7283	14.4753	14.104	13.8458	14.1252	16.6231	15.9283	14.4921	-0.641739	0.593976	1.5	+		-0.174703	0.801846	0	+		1.07659	0.397649	1.5	+		1.54362	0.0369739	0	+
sp|Q8K182|CO8A_MOUSE	C8a	Complement component C8 alpha chain OS=Mus musculus GN=C8a PE=1 SV=1	38.466	1	0	4.09	66080	37	2	2	2	2	8	8	13.2607	10.6966	11.4943	12.1128	13.0432	12.772	12.207	13.3767	9.13483	10.8734	11.3588	13.124	12.7317	12.5622	15.1238	-0.768377	0.463915	1	+		0.622827	0.444892	0	+		0.958608	0.158087	0	+		2.34981	0.105748	1	+
sp|O08532|CA2D1_MOUSE	Cacna2d1	Voltage-dependent calcium channel subunit alpha-2/delta-1 OS=Mus musculus GN=Cacna2d1 PE=1 SV=1	108.255	1	0	2.63	124630	59	3	3	3	3	4	4	10.5982	12.8507	10.4455	10.6507	10.7898	11.2964	10.9778	11.9882	9.13483	13.2102	10.5808	10.2934	10.8596	11.0634	11.3406	-0.331428	0.759421	25.5			-0.175189	0.621021	0			0.126814	0.847298	18.5			0.283054	0.793457	7
sp|Q9CXW3|CYBP_MOUSE	Cacybp	Calcyclin-binding protein OS=Mus musculus GN=Cacybp PE=1 SV=1	60.446	1	0	17.03	26510	16	3	3	3	3	5	5	10.5982	9.2942	14.1201	10.6507	10.7898	10.8819	10.9778	11.9882	12.9918	10.785	14.3116	12.0715	10.8596	11.0634	11.3406	1.37417	0.322003	1	+		-0.0715748	0.846031	1			-0.00633056	0.995473	1	+		-1.45208	0.162922	1	+
sp|B2RQC6|PYR1_MOUSE	Cad	CAD protein OS=Mus musculus GN=Cad PE=1 SV=1	959.349	1	0	20.85	243238	120	35	35	36	36	209	209	19.1026	17.0406	18.7598	22.5422	17.8382	15.4748	13.5209	20.8084	17.2961	17.8074	19.1791	18.5601	20.4855	14.2536	21.5452	-1.15065	0.383628	155	+		1.85082	0.517561	8	+		-2.4507	0.255115	72.1667	+		0.550773	0.790497	90.8333	+
sp|P0DP26|CALM1_MOUSE	Calm1	Calmodulin-1 OS=Mus musculus GN=Calm1 PE=1 SV=1	65.459	3	0	11.41	16838	9	1	1	1	1	8	8	10.5982	15.3723	15.2383	11.7066	10.7898	14.0847	12.5269	11.9882	11.7867	12.0108	15.2656	13.6701	10.8596	13.271	11.3406	-0.0455487	0.976212	7.5	+		-0.523657	0.628516	0	+		-0.881467	0.551784	3.5	+		-1.35958	0.286839	4	+
sp|O35887|CALU_MOUSE	Calu	Calumenin OS=Mus musculus GN=Calu PE=1 SV=1	12.031	1	0	4.13	37064	17	1	1	1	1	1	1	10.5982	12.0636	12.1429	11.5226	10.2579	10.7915	10.9735	11.9882	8.72553	13.3106	11.724	11.3327	10.7692	11.8442	11.5352	-0.308648	0.771364	4.5	+		0.380107	0.485363	0	+		-0.579039	0.29728	2.5	+		0.109715	0.928094	2	+
sp|Q6PHZ2|KCC2D_MOUSE	Camk2d	Calcium/calmodulin-dependent protein kinase type II subunit delta OS=Mus musculus GN=Camk2d PE=1 SV=1	121.528	1	0	6.01	56369	29	3	3	3	3	10	10	13.2835	13.2558	10.4455	10.6507	10.7898	10.8511	10.9778	11.9882	11.7283	13.9776	10.5002	10.2934	10.8596	11.0634	11.3406	-0.283977	0.814003	2.5	+		-0.0638618	0.86353	0			-0.757134	0.39984	1.5	+		-0.537019	0.616846	1	+
sp|Q80VC9|CAMP3_MOUSE	Camsap3	Calmodulin-regulated spectrin-associated protein 3 OS=Mus musculus GN=Camsap3 PE=1 SV=1	22.306	1	0	1.12	135175	74	1	1	1	1	4	4	10.5982	9.99847	10.4455	10.6507	10.7898	10.8819	10.9778	11.9882	9.30725	10.785	10.5808	10.2934	10.8596	11.0634	10.7388	-0.181574	0.631346	9.83333			-0.27219	0.458964	0			0.736253	0.0585291	3.66667			0.645637	0.163399	6.16667
sp|P35564|CALX_MOUSE	Canx	Calnexin OS=Mus musculus GN=Canx PE=1 SV=1	774.751	1	0	39.76	67278	36	22	22	27	27	131	131	13.9075	19.8306	14.6189	15.1435	14.7834	16.4172	15.5344	16.1749	14.7644	19.2797	16.1457	16.1668	12.2215	15.3795	16.2575	0.714034	0.679885	30.8333	+		-1.10797	0.365152	0	+		-0.147656	0.918952	13	+		-1.96966	0.253196	17.8333	+
sp|O35350|CAN1_MOUSE	Capn1	Calpain-1 catalytic subunit OS=Mus musculus GN=Capn1 PE=1 SV=1	333.571	1	0	22.16	82106	45	12	12	13	13	44	44	14.674	10.1995	16.0217	13.0419	10.7898	12.2545	13.6546	12.2746	17.1978	13.2374	15.6619	15.255	10.8006	11.0634	14.7672	1.85375	0.261296	6	+		-0.0330021	0.98036	0	+		-1.24089	0.40408	2	+		-3.12764	0.0822524	4	+
sp|O08529|CAN2_MOUSE	Capn2	Calpain-2 catalytic subunit OS=Mus musculus GN=Capn2 PE=1 SV=4	964.583	1	0	40	79872	38	21	21	25	25	153	153	16.9231	13.6229	18.2258	15.584	14.0391	13.6553	13.3055	13.0369	18.9626	13.6537	17.3218	17.4036	13.6674	11.0634	13.9945	0.746506	0.635236	21.5	+		-0.60076	0.49535	0	+		-2.57974	0.0427836	9.33333	+	+	-3.92701	0.0514213	12.1667	+
sp|O88456|CPNS1_MOUSE	Capns1	Calpain small subunit 1 OS=Mus musculus GN=Capns1 PE=1 SV=1	547.499	1	1	54.28	28463	13	9	9	13	13	124	124	17.0728	15.3087	17.5065	15.2042	16.6558	12.3993	12.8669	14.2183	18.2031	15.6106	17.3675	16.2974	10.3994	13.5714	13.3865	0.596559	0.496945	75.5	+		-1.58262	0.315718	0	+		-2.23798	0.0937017	34.1667	+		-4.41716	0.00998428	41.3333	+	+
sp|Q60865|CAPR1_MOUSE	Caprin1	Caprin-1 OS=Mus musculus GN=Caprin1 PE=1 SV=2	479.287	1	0	23.34	78169	23	12	12	14	14	142	142	17.8557	15.7059	17.0684	16.7175	15.1501	14.5216	14.1593	15.4896	17.1853	17.3978	17.2603	16.3889	14.6063	15.0603	15.0554	0.221217	0.67395	40.6667	+		0.0771635	0.845905	0	+		-2.00671	0.00970211	16.8333	+	+	-2.15076	0.000784166	23.8333	+	+
sp|P47753|CAZA1_MOUSE	Capza1	F-actin-capping protein subunit alpha-1 OS=Mus musculus GN=Capza1 PE=1 SV=4	163.239	1	0	26.92	32940	17	5	4	5	4	36	23	12.4739	13.4973	13.099	16.0935	11.1481	15.8235	16.9566	11.9882	13.1528	13.1143	14.1734	16.7556	11.2046	12.2132	12.2256	0.508124	0.678736	3.33333	+		-2.09794	0.273373	0	+		0.188166	0.911814	0	+		-2.4179	0.0695809	3.33333	+
sp|P47754|CAZA2_MOUSE	Capza2	F-actin-capping protein subunit alpha-2 OS=Mus musculus GN=Capza2 PE=1 SV=3	83.403	1	0	17.83	32967	16	4	3	4	3	21	8	10.5982	12.5495	11.8627	14.0976	11.4668	14.2556	12.9075	11.9882	12.5973	10.785	11.9537	14.6851	10.8596	11.0634	11.3406	0.228272	0.841837	6.5	+		-1.56666	0.085438	2	+		0.37754	0.705212	5	+		-1.41739	0.205575	3.5	+
sp|P47757|CAPZB_MOUSE	Capzb	F-actin-capping protein subunit beta OS=Mus musculus GN=Capzb PE=1 SV=3	211.636	1	0	40.07	31345	20	7	7	9	9	44	44	12.34	14.2245	14.3425	17.438	15.1333	16.9475	17.4604	14.5713	13.4857	14.6165	15.1322	17.4453	11.575	15.1828	16.1967	0.58373	0.679335	4	+		-1.71001	0.286519	0	+		1.44192	0.297628	3	+		-0.851814	0.602215	1	+
sp|Q8K3W3|CASC3_MOUSE	Casc3	Protein CASC3 OS=Mus musculus GN=Casc3 PE=1 SV=3	14.741	1	0	1.58	75770	30	1	1	1	1	1	1	10.7964	8.19276	10.4291	10.7328	10.7898	9.87018	10.9778	11.9882	9.129	11.3005	10.5251	10.3139	9.55709	11.0634	11.3406	0.279369	0.727774	2.66667	+		-0.252827	0.729805	0			0.86875	0.294878	0	+		0.336553	0.653375	2.66667	+
sp|Q8VHK1|CSKI2_MOUSE	Caskin2	Caskin-2 OS=Mus musculus GN=Caskin2 PE=1 SV=3	15.132	1	0	0.92	126779	53	1	1	1	1	3	3	8.65379	9.99847	10.4455	10.6507	10.7898	10.8819	10.9778	11.9882	8.91087	10.785	10.5808	10.2934	10.8596	11.0634	11.3406	0.205433	0.750354	0			-0.0715748	0.846031	2			1.22235	0.0600327	1			0.945346	0.125056	1
sp|O54724|CAVN1_MOUSE	Cavin1	Caveolae-associated protein 1 OS=Mus musculus GN=Cavin1 PE=1 SV=1	154.32	1	0	18.62	43954	21	5	5	5	5	10	10	10.5982	13.7456	13.157	13.7477	10.7898	10.8819	10.9778	11.9882	12.881	11.0151	13.7413	16.9365	10.8596	11.0634	11.3406	0.831352	0.586374	12	+		-0.0715748	0.846031	3.5			-1.65267	0.0846948	9.5	+		-2.5556	0.142083	6	+
sp|Q63918|CAVN2_MOUSE	Cavin2	Caveolae-associated protein 2 OS=Mus musculus GN=Cavin2 PE=1 SV=3	140.809	1	0	18.42	46764	25	6	6	7	7	38	38	14.2809	15.7264	15.8346	16.707	10.7898	12.7815	12.5126	12.2543	15.4037	14.1769	15.4232	17.4821	11.6503	12.021	16.3871	-0.0157441	0.98582	9	+		1.26824	0.399313	6	+		-3.55268	0.00184104	6.5	+	+	-2.2687	0.193019	8.5	+
sp|P48758|CBR1_MOUSE	Cbr1	Carbonyl reductase [NADPH] 1 OS=Mus musculus GN=Cbr1 PE=1 SV=3	41.522	1	0	7.22	30641	19	2	2	2	2	6	6	13.4114	11.8629	13.7745	10.6507	13.4623	10.8819	10.9778	11.9882	12.0112	12.5366	13.6305	10.2934	12.3336	11.0634	11.3406	-0.306957	0.76982	3.66667	+		-0.248383	0.762839	0			-0.59731	0.548039	1.66667	+		-0.538736	0.568788	2	+
sp|P83917|CBX1_MOUSE	Cbx1	Chromobox protein homolog 1 OS=Mus musculus GN=Cbx1 PE=1 SV=1	118.096	1	0	14.59	21418	10	2	1	2	1	24	12	10.5982	9.99847	10.4455	10.6507	16.4378	11.7587	10.9778	11.9882	9.06707	10.785	10.5808	10.2934	15.9969	13.3647	11.3406	-0.24162	0.579354	10			0.776742	0.691348	0	+		2.36745	0.105641	3.5	+		3.38581	0.0387311	6.5	+	+
sp|P23198|CBX3_MOUSE	Cbx3	Chromobox protein homolog 3 OS=Mus musculus GN=Cbx3 PE=1 SV=2	131.039	1	0	22.95	20855	9	3	2	3	2	38	26	10.5982	10.5634	10.4455	12.6167	12.7271	15.1908	14.2578	13.6806	9.80139	11.814	10.5808	13.2294	15.7334	16.0837	14.4031	0.300475	0.753204	1	+		1.44264	0.111053	0	+		2.90813	0.00742801	1	+		4.0503	0.00923107	0	+
sp|Q61686|CBX5_MOUSE	Cbx5	Chromobox protein homolog 5 OS=Mus musculus GN=Cbx5 PE=1 SV=1	90.107	1	0	10.47	22186	12	3	3	3	3	25	25	10.5865	9.99847	10.4455	10.6507	18.289	11.6617	10.5262	11.9882	10.622	10.785	10.5808	10.2934	17.5151	13.4022	11.5484	0.150031	0.434218	17.1667			1.03892	0.699977	20.3333	+		2.69602	0.176161	25	+		3.58491	0.0599623	12.5	+
sp|Q8K1A6|C2D1A_MOUSE	Cc2d1a	Coiled-coil and C2 domain-containing protein 1A OS=Mus musculus GN=Cc2d1a PE=1 SV=2	24.432	1	0	3.18	103698	54	3	3	3	3	5	5	10.5982	10.3815	10.4455	10.6507	10.7898	10.8819	10.9778	12.1941	14.469	11.0665	10.5808	10.2934	10.8596	11.0634	11.6266	1.08347	0.307093	5.5	+		-0.0277056	0.951689	0			0.69196	0.0851036	2			-0.419214	0.733055	3.5	+
sp|Q5U465|CC125_MOUSE	Ccdc125	Coiled-coil domain-containing protein 125 OS=Mus musculus GN=Ccdc125 PE=2 SV=2	17.137	1	0	1.4	56655	35	1	1	1	1	1	1	10.5982	13.1739	10.4455	10.6507	10.7898	12.181	13.9311	11.9882	11.2199	10.785	10.5808	10.2934	10.8596	13.6334	11.3406	-0.497258	0.493484	2.5			-0.277996	0.801484	0	+		1.0055	0.316356	1	+		1.22476	0.164394	1.5
sp|A2AJB1|CC183_MOUSE	Ccdc183	Coiled-coil domain-containing protein 183 OS=Mus musculus GN=Ccdc183 PE=2 SV=1	14.367	1	0	1.5	62117	37	1	1	1	1	16	16	16.2579	9.99847	10.4455	10.6507	13.0994	10.8819	10.9778	11.9882	9.13483	10.785	10.5808	10.2934	18.2219	11.0634	11.3406	-1.63961	0.32356	4			1.80509	0.419456	0			-0.101275	0.950593	2			3.34342	0.156593	2
sp|Q9D024|CCD47_MOUSE	Ccdc47	Coiled-coil domain-containing protein 47 OS=Mus musculus GN=Ccdc47 PE=1 SV=2	145.972	1	0	18.84	55844	22	6	6	6	6	11	11	10.5982	14.8336	10.4455	10.6507	10.7898	10.8819	10.9778	11.9882	9.13483	12.8589	10.5808	10.2934	11.7187	11.0634	11.3406	-0.91498	0.514802	12.6667			0.214784	0.583082	2.5			-0.472521	0.683556	7			0.657243	0.513788	8.16667
sp|Q3URS9|CCD51_MOUSE	Ccdc51	Coiled-coil domain-containing protein 51 OS=Mus musculus GN=Ccdc51 PE=1 SV=1	35.342	1	0	7.64	45132	26	2	2	2	2	4	4	10.5352	11.5146	10.4455	10.6507	10.7898	10.8819	10.9778	11.9882	9.13483	12.7903	10.5808	10.2934	10.8596	11.0634	11.3406	-0.0866405	0.917537	1.5	+		-0.0715748	0.846031	0			0.372963	0.354882	0	+		0.388029	0.687898	1.5
sp|Q3TCJ8|CCD69_MOUSE	Ccdc69	Coiled-coil domain-containing protein 69 OS=Mus musculus GN=Ccdc69 PE=1 SV=1	11.59	1	0	9.9	23296	12	1	1	1	1	1	1	10.5982	11.4764	10.4455	10.6507	10.7898	10.8819	10.9778	11.9882	9.13483	11.461	10.5808	10.2934	10.8596	11.0634	11.3406	-0.425177	0.455638	6.5			-0.0715748	0.846031	2			0.366763	0.351081	5			0.720365	0.269255	3.5
sp|Q5SNZ0|GRDN_MOUSE	Ccdc88a	Girdin OS=Mus musculus GN=Ccdc88a PE=1 SV=2	133.602	1	0	3.95	215918	120	6	6	6	6	22	22	13.8683	12.9842	14.537	10.6507	13.7342	14.0974	13.4537	11.9882	12.4919	13.7203	14.5742	10.2934	13.8953	13.4522	11.2216	-0.240102	0.85498	464.667	+		-0.462003	0.622947	147.167	+		0.308344	0.760449	338	+		0.0864429	0.949543	273.833	+
sp|Q8VC31|CCDC9_MOUSE	Ccdc9	Coiled-coil domain-containing protein 9 OS=Mus musculus GN=Ccdc9 PE=1 SV=1	102.541	1	0	6.81	61445	30	5	5	6	6	11	11	13.7938	11.6225	13.3228	10.8701	13.2651	12.3463	10.8421	11.9882	12.5908	12.2665	13.3002	11.2822	15.6905	13.4054	11.3406	-0.0424149	0.959872	2.33333	+		1.36839	0.308229	0	+		-0.291881	0.744174	0	+		1.11892	0.379862	2.33333	+
sp|Q3UHI0|CCSE2_MOUSE	Ccser2	Serine-rich coiled-coil domain-containing protein 2 OS=Mus musculus GN=Ccser2 PE=1 SV=1	30.875	1	0	1.8	92932	48	1	1	1	1	1	1	10.5982	9.99847	10.6371	10.6507	10.7898	10.8819	10.9778	11.9882	9.00252	10.785	10.3625	10.2934	10.8596	11.0634	11.3406	-0.360239	0.420018	1	+		-0.0715748	0.846031	0			0.68834	0.0753614	0			0.977005	0.0923812	1	+
sp|P80314|TCPB_MOUSE	Cct2	T-complex protein 1 subunit beta OS=Mus musculus GN=Cct2 PE=1 SV=4	172.025	1	0	19.25	57477	36	8	8	8	8	36	36	16.8714	14.9226	12.4815	13.6399	11.6498	12.7642	13.7773	11.9882	15.802	14.3368	13.8621	15.2049	14.7326	11.0634	14.1046	0.322611	0.766003	30.5	+		0.755329	0.523003	3	+		-1.93397	0.115767	15.5	+		-1.50125	0.222561	18	+
sp|P80318|TCPG_MOUSE	Cct3	T-complex protein 1 subunit gamma OS=Mus musculus GN=Cct3 PE=1 SV=1	323.824	1	0	26.42	60630	38	14	14	15	15	57	57	18.346	16.3589	15.6647	11.5346	16.1649	14.3629	16.2975	12.6548	17.323	16.2655	14.9205	15.807	16.2797	14.8046	11.3406	0.60298	0.704614	1.66667	+		-0.728382	0.666568	0	+		-0.606002	0.729133	0	+		-1.93736	0.213619	1.66667	+
sp|P80315|TCPD_MOUSE	Cct4	T-complex protein 1 subunit delta OS=Mus musculus GN=Cct4 PE=1 SV=3	250.651	1	0	29.31	58066	38	12	12	12	12	50	50	18.2925	15.9377	12.8887	14.4781	11.3747	13.4682	12.2028	12.5905	16.991	15.2232	13.1147	15.0693	12.8918	10.9633	11.2103	-0.299703	0.836987	1	+		-0.720583	0.364148	0	+		-2.99019	0.0507407	1	+		-3.41107	0.0239802	0	+
sp|P80316|TCPE_MOUSE	Cct5	T-complex protein 1 subunit epsilon OS=Mus musculus GN=Cct5 PE=1 SV=1	181.846	1	0	17.93	59624	37	7	7	7	7	28	28	16.4118	15.316	13.383	13.164	11.0508	11.8554	10.9778	11.9882	14.4439	15.3492	13.6266	14.2578	10.8596	11.5559	11.3406	-0.149327	0.867705	7.5	+		-0.216028	0.57095	0	+		-3.10064	0.00942121	4	+		-3.16734	0.000939727	3.5	+
sp|P80317|TCPZ_MOUSE	Cct6a	T-complex protein 1 subunit zeta OS=Mus musculus GN=Cct6a PE=1 SV=3	434.493	1	0	39.17	58004	28	18	16	19	16	93	80	18.3037	17.0125	12.9971	13.0351	10.8207	12.5207	10.9778	11.9882	17.395	16.4992	13.7701	15.1446	11.1176	11.0634	12.4241	0.365163	0.82482	28.3333	+		-0.0418425	0.947877	0	+		-3.76022	0.0386212	7	+	+	-4.16723	0.0090961	21.3333	+	+
sp|Q61390|TCPW_MOUSE	Cct6b	T-complex protein 1 subunit zeta-2 OS=Mus musculus GN=Cct6b PE=1 SV=4	60.994	1	0	8.29	58185	30	3	1	4	1	16	3	10.5982	9.99847	10.4455	10.6507	10.7898	10.8819	10.9778	11.9882	12.2858	10.785	10.5808	10.2934	10.8596	11.0634	12.4241	0.563063	0.274953	1.33333			0.289601	0.606276	0			0.736253	0.0585291	0			0.462791	0.519071	1.33333
sp|P80313|TCPH_MOUSE	Cct7	T-complex protein 1 subunit eta OS=Mus musculus GN=Cct7 PE=1 SV=1	240.266	1	0	15.26	59652	33	8	8	8	8	61	61	17.1684	14.3868	13.3924	14.4205	12.3715	11.8308	12.0449	11.9882	15.5582	14.6856	11.4483	14.5113	14.7398	11.4338	11.3406	-0.791178	0.537314	24.3333	+		0.445884	0.656878	16.5	+		-2.7832	0.0145415	26.5	+	+	-1.54614	0.32431	14.3333	+
sp|P42932|TCPQ_MOUSE	Cct8	T-complex protein 1 subunit theta OS=Mus musculus GN=Cct8 PE=1 SV=3	311.516	1	0	24.64	59555	40	12	12	12	12	62	62	17.5811	15.8991	15.5651	14.6196	11.8719	11.9049	10.9778	11.9882	17.2208	15.4168	15.4557	15.6619	10.9823	11.6332	14.7743	0.0225989	0.977029	2	+		0.777554	0.479818	0	+		-4.2305	0.000688657	2	+		-3.47555	0.0254417	0	+
sp|O35566|CD151_MOUSE	Cd151	CD151 antigen OS=Mus musculus GN=Cd151 PE=1 SV=2	59.333	1	0	6.32	28246	12	2	2	2	2	6	6	10.5982	13.3503	10.4455	10.6507	10.7898	10.8819	10.9778	11.9882	9.13483	12.5441	10.5808	10.2934	10.8596	11.0634	11.3406	-0.622855	0.553992	1.33333			-0.0715748	0.846031	0			-0.101696	0.89677	0			0.449584	0.61778	1.33333
sp|Q61735|CD47_MOUSE	Cd47	Leukocyte surface antigen CD47 OS=Mus musculus GN=Cd47 PE=1 SV=2	69.192	1	0	4.29	33098	13	1	1	1	1	15	15	10.5982	14.2961	12.1441	10.6507	10.7898	10.8819	10.9778	11.9882	11.3795	13.5348	10.5808	10.2934	10.8596	11.0634	11.3406	-0.475141	0.690434	1	+		-0.0715748	0.846031	0			-0.76281	0.435113	1	+		-0.359244	0.698357	0	+
sp|Q9QWK4|CD5L_MOUSE	Cd5l	CD5 antigen-like OS=Mus musculus GN=Cd5l PE=1 SV=3	470.053	1	0	41.48	38863	26	13	13	14	14	275	275	17.8666	16.5276	18.7312	17.3694	18.1342	19.3357	20.432	17.3485	16.2053	16.6229	18.8361	16.6022	18.9304	20.3921	16.9389	-0.55705	0.488376	67.3333	+		-0.0588268	0.961477	1.5	+		1.18891	0.196859	26.5	+		1.68713	0.184315	42.3333	+
sp|P35762|CD81_MOUSE	Cd81	CD81 antigen OS=Mus musculus GN=Cd81 PE=1 SV=2	149.794	1	0	27.54	25815	8	3	3	4	4	14	14	11.6787	17.0211	10.4455	14.9237	10.7898	10.8819	10.9778	11.9882	9.13483	12.3647	10.5808	10.2934	10.8596	11.0634	13.434	-2.92382	0.125609	2.33333	+		0.62621	0.450832	0			-2.3578	0.173676	1	+		1.19222	0.307688	1.33333
sp|P40240|CD9_MOUSE	Cd9	CD9 antigen OS=Mus musculus GN=Cd9 PE=1 SV=2	81.934	1	0	21.24	25258	7	3	3	3	3	11	11	10.5982	15.3764	10.4455	10.6507	10.7898	10.8819	10.9778	11.9882	9.13483	13.6558	10.5808	10.2934	10.8596	11.0634	11.3406	-0.851449	0.600979	3.5			-0.0715748	0.846031	0			-0.608225	0.640028	1.5			0.171649	0.886984	2
sp|Q8R349|CDC16_MOUSE	Cdc16	Cell division cycle protein 16 homolog OS=Mus musculus GN=Cdc16 PE=1 SV=1	15.48	1	0	1.29	71460	35	1	1	1	1	2	2	14.2588	9.99847	10.4455	10.6507	10.7898	10.8819	10.9778	11.9882	10.5312	10.785	10.5808	10.7898	10.8596	11.0634	11.3406	-0.666654	0.523866	15	+		-0.0715748	0.846031	0			-0.178908	0.866763	7			0.416171	0.0321304	8	+
sp|Q9JJ66|CDC20_MOUSE	Cdc20	Cell division cycle protein 20 homolog OS=Mus musculus GN=Cdc20 PE=1 SV=2	41.562	1	0	8.02	54816	25	3	3	3	3	9	9	11.3636	9.37902	12.1771	10.6507	10.7898	10.8819	10.9778	11.9882	12.7914	10.3337	10.9204	10.2934	10.8596	11.0634	9.80321	0.192155	0.825481	2	+		-0.584039	0.264082	0			0.266862	0.698011	0	+		-0.509332	0.53615	2	+
sp|Q8BGZ4|CDC23_MOUSE	Cdc23	Cell division cycle protein 23 homolog OS=Mus musculus GN=Cdc23 PE=1 SV=2	27.457	1	0	1.68	68562	34	1	1	1	1	2	2	13.0132	10.3117	10.4455	12.5427	10.7898	10.8819	10.9778	11.9882	10.1875	10.785	10.5808	10.8152	10.8596	11.0634	11.3406	-0.986122	0.216797	2.66667	+		-0.0715748	0.846031	0			-0.418797	0.59836	1	+		0.495751	0.0620382	1.66667	+
sp|P60766|CDC42_MOUSE	Cdc42	Cell division control protein 42 homolog OS=Mus musculus GN=Cdc42 PE=1 SV=2	103.068	1	2	36.65	21259	9	5	4	5	4	32	30	16.5406	16.6076	16.2062	14.3876	11.6995	13.1634	10.3472	11.9882	16.1106	17.582	14.9686	14.6814	11.6043	13.0563	11.3406	-0.0998203	0.909442	4	+		0.200804	0.815636	0	+		-4.13591	0.00182649	3	+		-3.83528	0.00794228	1	+
sp|Q7TT50|MRCKB_MOUSE	Cdc42bpb	Serine/threonine-protein kinase MRCK beta OS=Mus musculus GN=Cdc42bpb PE=1 SV=2	122.388	1	2	4.26	194753	94	6	6	6	6	18	18	10.5982	15.0672	10.4455	10.6507	10.7898	11.5542	10.9778	11.9882	14.3057	14.2224	10.5808	10.2934	10.8596	11.0634	11.3406	0.660181	0.690414	14.3333	+		-0.239636	0.517395	0			-0.36288	0.764853	5.83333			-1.2627	0.380812	8.5	+
sp|Q80UW5|MRCKG_MOUSE	Cdc42bpg	Serine/threonine-protein kinase MRCK gamma OS=Mus musculus GN=Cdc42bpg PE=1 SV=2	46.475	1	0	0.77	172147	83	1	1	1	1	9	9	12.5799	9.99847	10.4455	10.6507	10.7898	10.8819	10.9778	11.9882	10.7229	10.785	10.5808	10.2934	10.8596	11.0634	11.3406	-0.323083	0.598049	1			-0.0715748	0.846031	0			0.240823	0.717481	0			0.492331	0.0368491	1
sp|Q9JM96|BORG4_MOUSE	Cdc42ep4	Cdc42 effector protein 4 OS=Mus musculus GN=Cdc42ep4 PE=1 SV=1	153.864	1	0	8.88	37869	21	3	3	3	3	16	16	10.5982	9.99847	13.9608	10.6507	10.7898	10.8819	10.9778	11.9882	11.8228	10.785	13.6446	10.2934	10.8596	11.0634	11.3406	0.334438	0.783698	29.6667	+		-0.0715748	0.846031	5			-0.142581	0.884508	17			-0.548594	0.562475	17.6667	+
sp|Q99M54|CDCA3_MOUSE	Cdca3	Cell division cycle-associated protein 3 OS=Mus musculus GN=Cdca3 PE=1 SV=2	48.133	1	0	13.91	28708	15	3	3	3	3	11	11	10.5982	10.7263	15.8448	10.6507	10.7898	10.7819	10.9778	11.9882	11.8516	12.3051	15.5383	10.2934	10.8596	11.0634	11.3406	0.542101	0.760827	10.3333	+		-0.0465816	0.902186	0			-0.820551	0.559503	3	+		-1.40923	0.330674	7.33333	+
sp|Q9WTR5|CAD13_MOUSE	Cdh13	Cadherin-13 OS=Mus musculus GN=Cdh13 PE=1 SV=2	47.127	1	0	1.68	78186	36	1	1	1	1	8	8	10.5982	12.2551	10.4455	10.6507	10.7898	10.8819	10.9778	11.9882	9.13483	13.1835	10.5808	10.2934	10.8596	11.0634	11.3406	-0.189205	0.849356	9			-0.0715748	0.846031	0			0.172097	0.746414	6			0.289727	0.787269	3
sp|Q8VDP6|CDIPT_MOUSE	Cdipt	CDP-diacylglycerol--inositol 3-phosphatidyltransferase OS=Mus musculus GN=Cdipt PE=1 SV=1	18.741	1	0	5.16	23599	11	1	1	1	1	3	3	10.5982	12.9456	10.4455	10.6507	10.7898	10.8819	10.9778	11.9882	9.13483	11.3891	10.5808	10.2934	10.8596	11.0634	11.3406	-0.810442	0.325852	25.6667			-0.0715748	0.846031	0			-0.000541575	0.999371	3.66667			0.738325	0.247652	22
sp|P11440|CDK1_MOUSE	Cdk1	Cyclin-dependent kinase 1 OS=Mus musculus GN=Cdk1 PE=1 SV=3	38.796	1	13	6.06	34107	21	2	2	2	2	2	2	13.4367	13.8685	12.9946	10.6507	10.7898	12.9683	11.8057	11.9882	14.1462	14.0025	13.2839	10.2934	11.15	12.2673	11.3406	0.193881	0.871758	1	+		-0.302039	0.637061	0	+		-0.849629	0.353756	0	+		-1.34555	0.276746	1	+
sp|P24788|CD11B_MOUSE	Cdk11b	Cyclin-dependent kinase 11B OS=Mus musculus GN=Cdk11b PE=1 SV=2	126.397	1	1	8.42	91513	44	7	7	7	7	27	27	11.1602	9.42718	10.1633	10.7028	16.3002	15.3455	16.0773	15.967	9.06441	10.785	10.5808	11.6196	17.0438	16.4838	12.5088	0.149097	0.826161	3	+		-0.577012	0.655804	0	+		5.55913	1.23205e-05	0	+		4.83302	0.0158878	3	+
sp|Q8CEQ0|CDKL1_MOUSE	Cdkl1	Cyclin-dependent kinase-like 1 OS=Mus musculus GN=Cdkl1 PE=2 SV=1	12.997	1	0	2.27	41024	23	1	1	1	1	1	1	17.2554	15.4915	14.8336	10.6507	10.7898	12.5799	12.7374	11.9882	16.9038	15.8224	14.7252	10.2934	13.3314	13.3313	11.3406	-0.121589	0.953855	1.5	+		0.643948	0.436954	0	+		-2.53395	0.134904	0	+		-1.76842	0.371997	1.5	+
sp|Q8BI72|CARF_MOUSE	Cdkn2aip	CDKN2A-interacting protein OS=Mus musculus GN=Cdkn2aip PE=1 SV=1	177.648	1	0	8.17	59745	35	3	3	3	3	24	24	13.8622	10.9777	10.4455	10.6507	11.1785	10.8819	10.9778	11.9882	11.9563	11.7164	10.9935	10.6652	11.08	11.0634	11.3406	-0.151193	0.865531	32.6667	+		-0.0952982	0.768761	34.1667			-0.227399	0.795421	38.5	+		-0.171504	0.658644	28.3333	+
sp|Q4VAA2|CDV3_MOUSE	Cdv3	Protein CDV3 OS=Mus musculus GN=Cdv3 PE=1 SV=2	32.708	1	0	10.68	29729	19	1	1	1	1	1	1	10.5982	9.99847	10.4455	11.2281	10.7898	10.8819	10.9778	11.9882	9.13483	10.785	10.5808	10.9209	10.8596	11.0634	11.3406	-0.212162	0.677	4			-0.0715748	0.846031	0			0.591902	0.167877	1			0.732489	0.20447	3
sp|P28659|CELF1_MOUSE	Celf1	CUGBP Elav-like family member 1 OS=Mus musculus GN=Celf1 PE=1 SV=2	341.384	1	0	16.87	52107	19	7	6	14	13	47	44	14.0087	16.6256	12.042	12.0495	11.3727	10.8819	10.9778	11.9882	16.6553	15.7427	11.6944	10.2934	12.2143	11.0634	12.2125	-0.0849646	0.965502	13.5	+		0.52492	0.283768	0	+		-2.37625	0.0768184	7	+		-1.76637	0.383804	6.5	+
sp|Q9Z0H4|CELF2_MOUSE	Celf2	CUGBP Elav-like family member 2 OS=Mus musculus GN=Celf2 PE=1 SV=1	155.678	1	0	14.37	54271	21	6	5	6	5	25	22	11.0436	15.4598	13.6518	10.6507	10.7898	11.157	10.9778	12.643	14.5063	14.7079	11.5765	10.2934	10.8596	11.0634	11.3406	0.0695337	0.966233	16	+		-0.30404	0.580419	0	+		-1.30957	0.321334	6.5	+		-1.68315	0.251383	9.5	+
sp|Q9CXS4|CENPV_MOUSE	Cenpv	Centromere protein V OS=Mus musculus GN=Cenpv PE=1 SV=2	106.871	1	0	7.54	27541	15	2	2	2	2	26	26	10.5982	9.99847	10.4455	10.6507	15.3189	10.8819	10.9778	11.9882	9.13483	10.785	10.5808	10.2934	14.8459	11.0634	11.3406	-0.224678	0.592191	1			0.124899	0.940695	0			1.86852	0.12549	1			2.2181	0.101669	0
sp|Q5PR68|CE112_MOUSE	Cep112	Centrosomal protein of 112 kDa OS=Mus musculus GN=Cep112 PE=2 SV=2	85.012	1	0	4.09	112676	67	3	3	3	3	9	9	10.5982	13.5405	10.4455	10.6507	11.7101	10.8819	11.0721	11.9882	9.13483	13.6826	10.5808	10.2934	11.9778	11.451	11.3406	-0.385791	0.763372	5.66667			0.176743	0.634928	0	+		0.104361	0.899171	2	+		0.666895	0.590637	3.66667	+
sp|Q6A065|CE170_MOUSE	Cep170	Centrosomal protein of 170 kDa OS=Mus musculus GN=Cep170 PE=1 SV=2	372.095	1	0	10.39	175050	101	11	11	11	11	49	49	14.5344	14.1541	13.3307	10.6507	10.8522	10.8819	10.9778	11.9882	14.6368	14.2328	13.6174	11.7295	10.8596	11.0634	11.2337	0.386649	0.734147	9	+		-0.12281	0.728724	0			-1.99244	0.0728104	5.5	+		-2.5019	0.0223474	3.5	+
sp|Q80U49|C170B_MOUSE	Cep170b	Centrosomal protein of 170 kDa protein B OS=Mus musculus GN=Cep170b PE=1 SV=2	179.453	1	0	3.56	170821	104	4	4	4	4	19	19	12.1277	9.99847	12.9855	12.8526	10.7898	10.8819	10.9778	11.9882	13.0195	10.785	13.1576	14.1085	10.8596	11.0634	14.0999	0.776586	0.46086	8.5	+		0.848206	0.406707	0			-0.831601	0.306797	4.5	+		-0.759981	0.557245	4	+
sp|Q8BT07|CEP55_MOUSE	Cep55	Centrosomal protein of 55 kDa OS=Mus musculus GN=Cep55 PE=1 SV=2	448.396	1	0	36.58	53930	32	16	16	17	17	70	70	16.3086	16.6696	16.5259	14.9287	11.8283	15.9313	15.0341	14.8447	17.4936	16.7173	16.2858	14.8077	12.5365	13.2173	13.5651	0.217925	0.763441	3.66667	+		-1.30331	0.283779	0	+		-1.6986	0.133108	1.66667	+		-3.21983	0.00634654	2	+
sp|Q8CEE0|CEP57_MOUSE	Cep57	Centrosomal protein of 57 kDa OS=Mus musculus GN=Cep57 PE=1 SV=2	13.478	1	0	2.4	56909	34	1	1	1	1	1	1	11.923	10.0331	10.4455	10.6507	10.7898	10.8819	10.9778	11.9882	11.2468	10.785	11.027	10.732	10.8596	11.0634	11.3406	0.184652	0.678651	2	+		-0.0715748	0.846031	0			0.396396	0.45268	0	+		0.14017	0.476988	2	+
sp|Q8BMK0|CEP85_MOUSE	Cep85	Centrosomal protein of 85 kDa OS=Mus musculus GN=Cep85 PE=1 SV=2	64.392	1	0	5.26	85340	49	3	3	3	3	3	3	9.65571	10.8764	10.4455	13.2078	10.7898	10.8819	10.9778	11.9882	13.02	10.785	10.5808	10.2934	10.8596	11.0634	11.3406	0.123478	0.904494	691	+		-0.0715748	0.846031	33.1667			0.113123	0.893874	383.667	+		-0.0819297	0.917101	340.5
sp|Q9CZ62|CEP97_MOUSE	Cep97	Centrosomal protein of 97 kDa OS=Mus musculus GN=Cep97 PE=1 SV=1	16.597	1	0	1.87	94641	41	1	1	1	1	2	2	10.5382	9.99847	10.4455	10.6507	10.7898	10.8819	10.9778	11.9882	6.7162	10.785	10.5808	10.2934	10.8596	11.0634	11.3406	-0.814351	0.43559	21.5			-0.0715748	0.846031	3			0.751238	0.0534967	13.1667			1.49401	0.249553	11.3333
sp|P23953|EST1C_MOUSE	Ces1c	Carboxylesterase 1C OS=Mus musculus GN=Ces1c PE=1 SV=4	133.725	1	4	12.82	61056	26	5	5	6	6	62	62	13.5223	14.7144	13.6044	14.3732	14.345	15.7868	14.7544	13.1845	13.2239	14.2627	16.3297	13.939	15.5898	15.9262	13.7967	0.385266	0.615538	4	+		0.58655	0.517689	0	+		0.464102	0.477077	0	+		0.665386	0.520474	4	+
sp|P03953|CFAD_MOUSE	Cfd	Complement factor D OS=Mus musculus GN=Cfd PE=1 SV=1	17.178	1	0	3.47	28057	15	1	1	1	1	1	1	10.5982	12.1931	13.7916	13.2594	10.7898	12.7728	11.7066	11.9882	11.7721	10.9106	13.1247	12.6101	10.8329	12.9621	11.9894	-0.356172	0.69164	1	+		0.113761	0.87844	0	+		-0.64618	0.457766	0	+		-0.176248	0.828393	1	+
sp|P18760|COF1_MOUSE	Cfl1	Cofilin-1 OS=Mus musculus GN=Cfl1 PE=1 SV=3	224.986	1	1	43.37	18560	12	5	5	5	5	62	62	12.0657	16.3921	16.6116	17.7116	10.7898	13.6401	10.9778	11.9882	16.6377	14.8233	16.5533	18.4318	10.8596	15.8349	18.6212	0.916293	0.549586	3	+		3.25627	0.17309	6.5	+		-3.84624	0.0338061	3.5	+		-1.50626	0.50334	6	+
sp|Q8BHG9|CGBP1_MOUSE	Cggbp1	CGG triplet repeat-binding protein 1 OS=Mus musculus GN=Cggbp1 PE=1 SV=1	110.301	1	0	42.51	18761	12	7	7	7	7	28	28	11.0434	10.6489	15.5945	13.1071	10.7898	10.8306	12.2206	11.9882	16.3372	10.785	15.6656	15.3972	10.8596	10.6034	13.3189	1.94775	0.296204	161.167	+		0.136663	0.878614	24.6667	+		-1.14118	0.376737	52.6667	+		-2.95226	0.136824	133.167	+
sp|Q9D1L0|CHCH2_MOUSE	Chchd2	Coiled-coil-helix-coiled-coil-helix domain-containing protein 2 OS=Mus musculus GN=Chchd2 PE=2 SV=1	91.899	1	0	30.72	15661	6	3	3	3	3	21	21	10.5982	12.4552	15.061	10.6507	11.5744	10.8819	13.1569	11.9882	13.3885	13.0012	14.8518	10.2934	10.8596	11.0634	11.3406	0.692473	0.642229	9.5	+		-0.812466	0.217652	0	+		-0.29093	0.809175	5.83333	+		-1.79587	0.173246	3.66667	+
sp|Q9CRB9|MIC19_MOUSE	Chchd3	MICOS complex subunit Mic19 OS=Mus musculus GN=Chchd3 PE=1 SV=1	183.234	1	0	21.59	26335	17	6	6	6	6	25	25	12.2509	15.706	13.812	17.0718	13.0242	12.8583	12.1639	12.6371	11.6294	17.104	12.8025	16.6219	12.1968	12.935	11.13	-0.17071	0.924512	2.5	+		-0.583651	0.287798	0	+		-2.0393	0.106348	2.5	+		-2.45224	0.203045	0	+
sp|Q91VN4|MIC25_MOUSE	Chchd6	MICOS complex subunit Mic25 OS=Mus musculus GN=Chchd6 PE=1 SV=2	15.254	1	0	3.66	29852	16	1	1	1	1	1	1	10.5982	8.99878	10.4455	10.6507	10.7898	10.8819	10.9778	11.9882	9.13483	10.7039	10.5808	10.2934	10.8596	11.0634	11.3406	0.00497819	0.992844	9			-0.0715748	0.846031	0			0.986175	0.0870544	4			0.909622	0.0933732	5
sp|Q9D8B3|CHM4B_MOUSE	Chmp4b	Charged multivesicular body protein 4b OS=Mus musculus GN=Chmp4b PE=1 SV=2	102.148	1	0	19.2	24936	16	5	5	5	5	25	25	10.5982	13.6138	16.4181	10.6507	10.9402	14.7996	14.0092	11.7644	13.7269	13.9878	15.9412	10.6881	11.3238	14.4337	11.4711	0.765846	0.679372	8.33333	+		-0.468817	0.746385	0	+		0.0581732	0.973229	1	+		-1.17649	0.478908	7.33333	+
sp|P0C0A3|CHMP6_MOUSE	Chmp6	Charged multivesicular body protein 6 OS=Mus musculus GN=Chmp6 PE=1 SV=2	84.272	1	0	17.5	23416	11	3	3	3	3	21	21	11.7561	13.9843	10.0616	10.6507	12.9784	10.8819	11.2336	11.9882	13.4174	14.837	9.19062	10.2934	13.0852	11.0634	11.3406	0.321442	0.845168	2.5	+		0.0592014	0.941147	0	+		0.157371	0.877881	2.5	+		-0.104869	0.951695	0	+
sp|Q8R1T1|CHMP7_MOUSE	Chmp7	Charged multivesicular body protein 7 OS=Mus musculus GN=Chmp7 PE=1 SV=1	26.638	1	0	2.44	50633	23	1	1	1	1	8	8	11.1626	9.99847	10.4455	10.6507	11.2636	10.8819	10.9778	11.9882	9.66809	10.657	10.5808	10.2934	11.1584	11.0634	11.3406	-0.264472	0.453205	1.5	+		-0.0904396	0.777935	0			0.713589	0.0860149	0			0.887621	0.0230792	1.5	+
sp|Q8BIW9|CTF18_MOUSE	Chtf18	Chromosome transmission fidelity protein 18 homolog OS=Mus musculus GN=Chtf18 PE=1 SV=2	15.667	1	0	1.86	108137	58	1	1	1	1	4	4	11.9781	9.32938	10.4455	10.6507	10.7898	10.8819	10.9778	11.9882	9.77662	10.6143	10.5808	9.82526	10.8596	11.0634	11.3406	-0.401646	0.521383	3	+		-0.0715748	0.846031	0			0.558543	0.395581	1.5	+		0.888614	0.0301614	1.5	+
sp|P0CG14|CTF8A_MOUSE	Chtf8	Chromosome transmission fidelity protein 8 homolog isoform 2 OS=Mus musculus GN=Chtf8 PE=1 SV=1	35.317	1	0	7.69	52244	34	3	3	3	3	5	5	14.4481	10.6816	13.2037	11.8795	10.7898	10.8819	10.9778	11.9882	11.9685	11.9188	12.9098	12.4408	10.8596	11.0634	11.9471	-0.243775	0.783276	2.5	+		0.13058	0.774764	0			-1.3938	0.156777	1.5	+		-1.01944	0.0480832	1	+
sp|Q9CY57|CHTOP_MOUSE	Chtop	Chromatin target of PRMT1 protein OS=Mus musculus GN=Chtop PE=1 SV=2	453.825	1	0	30.12	26585	17	7	7	11	11	421	421	11.9581	11.7948	11.9226	10.6507	19.6211	19.3841	18.7193	18.2055	11.0342	12.4597	10.5808	15.1936	19.9029	19.053	18.0384	0.73555	0.523063	24.1667	+		0.0155977	0.979935	41.8333	+		7.40096	3.15066e-06	21.5	+	+	6.68101	0.0037636	44.5	+	+
sp|P60824|CIRBP_MOUSE	Cirbp	Cold-inducible RNA-binding protein OS=Mus musculus GN=Cirbp PE=1 SV=1	106.136	1	0	12.79	18607	13	2	2	2	2	33	33	13.5038	11.6413	11.8478	10.6507	14.6599	11.5863	14.7788	13.2452	14.0908	10.6048	14.0714	10.2934	13.1661	11.8042	11.3406	0.354208	0.778812	3	+		-1.46393	0.201283	0	+		1.65665	0.132715	1.5	+		-0.161487	0.907721	1.5	+
sp|Q91WS0|CISD1_MOUSE	Cisd1	CDGSH iron-sulfur domain-containing protein 1 OS=Mus musculus GN=Cisd1 PE=1 SV=1	86.502	1	0	43.52	12097	6	4	4	4	4	9	9	10.9437	16.0814	10.4455	10.6507	10.7898	10.8819	10.9778	11.9882	9.13483	14.8673	10.5808	10.2934	10.8596	11.0634	11.3406	-0.81122	0.675841	8.5	+		-0.0715748	0.846031	0			-0.870857	0.55201	6	+		-0.131212	0.933254	2.5
sp|Q9CQB5|CISD2_MOUSE	Cisd2	CDGSH iron-sulfur domain-containing protein 2 OS=Mus musculus GN=Cisd2 PE=1 SV=1	66.101	1	0	21.48	15242	9	2	2	2	2	4	4	10.5982	14.992	10.4455	10.6507	10.7898	10.8819	10.9778	11.9882	9.13483	12.153	10.5808	10.2934	10.8596	11.0634	11.3406	-1.13106	0.407513	37	+		-0.0715748	0.846031	1			-0.512126	0.669634	14.1667			0.547359	0.495415	23.8333	+
sp|B1AR13|CISD3_MOUSE	Cisd3	CDGSH iron-sulfur domain-containing protein 3, mitochondrial OS=Mus musculus GN=Cisd3 PE=1 SV=1	10.968	1	0	5.84	15676	11	1	1	1	1	1	1	10.5982	10.8035	10.4455	10.6507	11.0112	10.8819	10.9778	11.9882	9.13483	12.6903	10.5808	10.2934	10.8596	11.0634	11.3406	0.0503847	0.94825	2.5			-0.126921	0.714858	0			0.590342	0.0710872	2.5			0.413036	0.66013	0
sp|P49025|CTRO_MOUSE	Cit	Citron Rho-interacting kinase OS=Mus musculus GN=Cit PE=1 SV=3	14.169	1	0	0.54	235389	145	1	1	1	1	1	1	10.5982	10.7635	10.4455	10.6507	10.7898	10.8819	10.9778	11.9882	9.36346	10.785	10.5808	10.2934	10.8596	11.0634	11.3406	-0.358783	0.306299	276.5			-0.0715748	0.846031	0			0.54499	0.105965	108.5			0.832198	0.0856459	168
sp|Q3V1H1|CKAP2_MOUSE	Ckap2	Cytoskeleton-associated protein 2 OS=Mus musculus GN=Ckap2 PE=1 SV=1	102.529	1	0	13.1	74029	48	7	7	7	7	21	21	15.8138	12.2428	13.0086	12.2835	10.7898	10.8819	10.9778	14.9585	14.3177	12.759	13.2536	10.2028	10.8596	11.0634	11.3406	-0.703902	0.583232	1.5	+		-0.814148	0.531524	0			-1.43515	0.319883	1.5	+		-1.5454	0.197239	0	+
sp|Q8BMK4|CKAP4_MOUSE	Ckap4	Cytoskeleton-associated protein 4 OS=Mus musculus GN=Ckap4 PE=1 SV=2	770.123	1	0	64.17	63692	40	28	28	28	28	116	116	10.4926	18.7931	11.3354	11.7116	14.0739	12.9582	13.4043	11.9882	14.3425	19.0863	10.5808	10.2934	13.652	15.1114	14.7256	0.49259	0.866746	127	+		1.39016	0.0796826	14.3333	+		0.022983	0.991068	91.5	+		0.920557	0.723518	49.8333	+
sp|A2AGT5|CKAP5_MOUSE	Ckap5	Cytoskeleton-associated protein 5 OS=Mus musculus GN=Ckap5 PE=1 SV=1	518.889	1	0	13.34	225635	121	21	21	23	23	84	84	16.6967	13.4427	15.1549	12.2643	13.2163	14.0151	17.3812	11.9882	17.5371	12.8412	14.5642	13.8443	14.4636	13.3639	11.3406	0.307049	0.833867	11.5	+		-1.09419	0.515913	0	+		-0.239448	0.879129	6	+		-1.64068	0.300013	5.5	+
sp|Q80TV8|CLAP1_MOUSE	Clasp1	CLIP-associating protein 1 OS=Mus musculus GN=Clasp1 PE=1 SV=2	1292.36	1	0	28.47	169227	107	38	34	41	37	282	274	19.2659	15.2684	17.3831	13.3922	12.317	14.8227	15.3901	11.9882	18.9238	14.4542	16.8453	13.6789	13.5777	14.8304	12.2952	-0.351876	0.846821	30.1667	+		-0.0617654	0.960641	30.3333	+		-2.6979	0.130166	33.3333	+		-2.40779	0.178026	27.1667	+
sp|Q8BRT1|CLAP2_MOUSE	Clasp2	CLIP-associating protein 2 OS=Mus musculus GN=Clasp2 PE=1 SV=1	168.298	1	0	7.08	140739	84	9	5	9	5	23	15	14.6396	10.5964	12.578	10.6507	10.7898	10.8819	10.9778	11.9882	12.8696	11.4081	12.6209	10.2934	10.8596	11.0634	11.3406	-0.318126	0.78747	11.5	+		-0.0715748	0.846031	0			-0.9567	0.375132	8	+		-0.710149	0.364993	3.5	+
sp|Q99KN9|EPN4_MOUSE	Clint1	Clathrin interactor 1 OS=Mus musculus GN=Clint1 PE=1 SV=2	802.456	1	0	29.95	68513	25	19	19	21	21	170	170	14.4747	15.0942	19.7811	19.3754	16.3876	13.2303	14.0015	19.7765	19.5695	14.3523	18.9691	18.7432	16.7101	14.251	15.9828	0.727167	0.705868	9	+		-0.200989	0.91749	0	+		-1.33238	0.53511	3.66667	+		-2.26053	0.202913	5.33333	+
sp|Q922J3|CLIP1_MOUSE	Clip1	CAP-Gly domain-containing linker protein 1 OS=Mus musculus GN=Clip1 PE=1 SV=1	147.228	1	0	4.67	155814	101	5	5	5	5	12	12	10.7118	14.6799	13.2075	10.6507	14.2855	12.3669	12.575	11.9882	9.98546	15.2573	10.2496	10.2934	11.6683	13.2745	12.834	-0.866004	0.610247	46.5	+		-0.211664	0.781487	0	+		0.491446	0.673954	14	+		1.14579	0.495013	32.5	+
sp|Q60649|CLPB_MOUSE	Clpb	Caseinolytic peptidase B protein homolog OS=Mus musculus GN=Clpb PE=1 SV=1	11.896	1	0	1.62	76004	41	1	1	1	1	3	3	10.5982	10.6555	10.4805	10.6507	10.7898	10.8819	10.9778	11.9882	9.13483	12.9049	10.5808	10.2934	11.6907	11.0634	11.3406	0.132274	0.872682	0	+		0.205457	0.596125	1			0.563223	0.0926575	1	+		0.636406	0.531325	0
sp|Q8VBZ3|CLPT1_MOUSE	Clptm1	Cleft lip and palate transmembrane protein 1 homolog OS=Mus musculus GN=Clptm1 PE=1 SV=1	135.371	1	0	7.83	75291	27	3	3	3	3	14	14	10.5982	11.4864	10.4455	10.6507	10.7898	10.8819	10.9778	11.9882	9.13483	12.1447	10.5808	10.2934	10.8596	11.0634	11.3406	-0.256722	0.711882	16.1667			-0.0715748	0.846031	2.5			0.364279	0.356035	11.5			0.549426	0.492713	7.16667
sp|Q9JHS4|CLPX_MOUSE	Clpx	ATP-dependent Clp protease ATP-binding subunit clpX-like, mitochondrial OS=Mus musculus GN=Clpx PE=1 SV=2	45.986	1	0	3.94	69229	45	2	2	2	2	6	6	10.9149	10.865	10.2775	10.6507	10.7898	11.001	10.6565	11.9882	8.78256	12.108	9.98069	10.2934	10.8596	11.6254	11.3406	-0.385843	0.602764	3	+		0.166348	0.696763	0	+		0.431868	0.244324	1	+		0.98406	0.291494	2	+
sp|O08585|CLCA_MOUSE	Clta	Clathrin light chain A OS=Mus musculus GN=Clta PE=1 SV=2	62.249	1	0	19.15	25604	10	5	5	5	5	15	15	12.1005	16.9416	11.5105	13.3954	10.9193	12.2793	12.4874	11.9882	10.7311	16.4691	10.6423	14.1932	10.8596	12.5743	11.3406	-0.478042	0.806709	8	+		-0.327042	0.605464	0	+		-1.56844	0.261601	4	+		-1.41744	0.450501	4	+
sp|Q6IRU5|CLCB_MOUSE	Cltb	Clathrin light chain B OS=Mus musculus GN=Cltb PE=1 SV=1	98.542	1	0	17.47	25172	10	5	5	5	5	17	17	10.9697	16.6354	11.2684	10.9168	11.9983	11.3979	11.3033	11.9882	9.4768	16.4056	10.5808	11.5976	14.0715	11.0634	13.9685	-0.432326	0.841455	2.5	+		1.36252	0.171475	0	+		-0.77563	0.602239	1	+		1.01922	0.629559	1.5	+
sp|Q68FD5|CLH1_MOUSE	Cltc	Clathrin heavy chain 1 OS=Mus musculus GN=Cltc PE=1 SV=3	3528.29	1	0	76.18	191557	98	98	98	111	111	562	562	16.712	22.3115	17.0706	16.8663	15.3001	18.4504	17.3785	15.2205	16.686	21.4292	16.5936	18.0473	15.6581	17.9268	17.1183	-0.0510788	0.977883	106.5	+		0.313696	0.785892	49	+		-1.65274	0.334589	84.6667	+		-1.28796	0.414442	70.8333	+
sp|Q06890|CLUS_MOUSE	Clu	Clusterin OS=Mus musculus GN=Clu PE=1 SV=1	19.278	1	0	3.57	51656	22	1	1	1	1	1	1	12.0946	12.3982	10.6211	10.6507	10.7898	10.8819	10.9778	12.2355	9.65946	13.078	10.7439	10.2934	11.0047	11.0634	11.3406	-0.497439	0.59267	1	+		-0.085046	0.844537	0			-0.219873	0.717436	0	+		0.19252	0.836607	1	+
sp|Q9CZT6|CMS1_MOUSE	Cmss1	Protein CMSS1 OS=Mus musculus GN=Cmss1 PE=2 SV=1	61.519	1	0	14.13	31594	15	3	3	3	3	8	8	10.5982	10.5935	11.3532	15.0284	10.7898	10.8819	10.9778	11.9882	12.1168	10.2528	13.2502	15.7426	10.8596	11.0634	11.3406	0.947267	0.566566	4.33333	+		-0.0715748	0.846031	0			-0.733877	0.528113	1	+		-1.75272	0.254836	3.33333	+
sp|P53996|CNBP_MOUSE	Cnbp	Cellular nucleic acid-binding protein OS=Mus musculus GN=Cnbp PE=1 SV=2	292.562	1	0	40.45	19592	16	6	6	6	6	128	128	15.1496	15.9273	18.6439	17.1698	10.7898	12.4036	10.9778	11.9882	15.8382	14.3053	18.4725	16.4976	10.8596	11.3797	11.3406	-0.444232	0.713264	1	+		-0.346568	0.504519	0			-5.18275	0.000928199	0	+		-5.08509	0.00435686	1	+
sp|Q08091|CNN1_MOUSE	Cnn1	Calponin-1 OS=Mus musculus GN=Cnn1 PE=1 SV=1	68.098	1	0	8.08	33356	17	2	2	2	2	11	11	13.8982	9.99847	10.4455	16.8948	10.7898	10.8819	10.9778	12.4137	13.1234	10.785	10.5808	18.2712	10.8596	11.0634	11.4902	0.380885	0.879679	3	+		-0.128069	0.800595	0			-1.54343	0.388854	1	+		-2.05238	0.37802	2	+
sp|Q08093|CNN2_MOUSE	Cnn2	Calponin-2 OS=Mus musculus GN=Cnn2 PE=1 SV=1	328.569	1	0	30.82	33156	16	7	7	9	9	45	45	16.4498	12.1169	14.5052	15.7215	15.0316	12.7786	12.386	12.7576	14.9763	12.5564	16.742	15.6937	12.7434	11.0634	15.742	0.293787	0.828805	7	+		-0.0555092	0.968791	0	+		-1.45988	0.242227	1	+		-1.80918	0.297101	6	+
sp|Q9DAW9|CNN3_MOUSE	Cnn3	Calponin-3 OS=Mus musculus GN=Cnn3 PE=1 SV=1	40.153	1	0	7.88	36429	19	2	2	2	2	2	2	10.9511	9.99847	10.4455	10.2104	10.7898	10.8819	10.9778	11.9882	8.89784	10.785	10.5808	11.1777	10.8596	11.0634	11.3406	-0.0410389	0.942217	1.33333	+		-0.0715748	0.846031	0			0.758086	0.0709641	0	+		0.727551	0.284003	1.33333	+
sp|Q6ZQ08|CNOT1_MOUSE	Cnot1	CCR4-NOT transcription complex subunit 1 OS=Mus musculus GN=Cnot1 PE=1 SV=2	63.897	1	0	2.23	266808	136	5	5	5	5	7	7	15.9073	9.96469	10.166	10.6507	10.7898	10.8819	11.8332	11.9882	12.6393	11.4059	10.434	10.2934	14.1123	12.0492	11.3406	-0.479009	0.763171	6.33333	+		1.12741	0.211764	0	+		-0.298888	0.843826	1	+		1.30753	0.225438	5.33333	+
sp|Q8BH15|CNO10_MOUSE	Cnot10	CCR4-NOT transcription complex subunit 10 OS=Mus musculus GN=Cnot10 PE=1 SV=1	78.191	1	0	2.82	81818	44	1	1	1	1	2	2	10.7373	9.99847	10.4455	10.6507	10.7898	10.8819	10.9778	11.9882	8.28369	10.785	10.5808	10.2934	10.8596	11.0634	11.3406	-0.472246	0.460742	9			-0.0715748	0.846031	0			0.70147	0.0735863	5.5			1.10214	0.171961	3.5
sp|Q9CWN7|CNO11_MOUSE	Cnot11	CCR4-NOT transcription complex subunit 11 OS=Mus musculus GN=Cnot11 PE=1 SV=1	27.26	1	0	2.38	54959	28	1	1	1	1	6	6	13.4657	9.33966	10.284	10.6507	10.7898	10.8819	10.9778	11.9882	11.4564	10.9387	10.5808	10.2934	10.8596	11.0634	11.3406	-0.117639	0.902673	1	+		-0.0715748	0.846031	0			0.22445	0.8174	0	+		0.270513	0.434628	1	+
sp|Q8C5L3|CNOT2_MOUSE	Cnot2	CCR4-NOT transcription complex subunit 2 OS=Mus musculus GN=Cnot2 PE=1 SV=2	10.373	1	0	2.04	59711	26	1	1	1	1	7	7	12.001	9.99847	10.4455	10.6507	10.7898	10.8819	10.9778	11.9882	9.93366	10.785	10.5808	10.2934	10.8596	11.0634	11.3406	-0.375674	0.453694	0			-0.0715748	0.846031	1			0.385551	0.481117	1			0.689649	0.0387545	0
sp|Q8BT14|CNOT4_MOUSE	Cnot4	CCR4-NOT transcription complex subunit 4 OS=Mus musculus GN=Cnot4 PE=1 SV=2	67.164	1	0	4.7	63474	31	3	3	3	3	12	12	10.5982	12.4322	13.3091	10.6507	10.9082	10.8819	10.9778	11.9882	14.3969	13.4872	12.6682	10.2934	10.8596	11.0634	11.3406	0.963914	0.417621	1	+		-0.101174	0.776046	0			-0.558478	0.469679	0	+		-1.62357	0.181898	1	+
sp|P16330|CN37_MOUSE	Cnp	2',3'-cyclic-nucleotide 3'-phosphodiesterase OS=Mus musculus GN=Cnp PE=1 SV=3	29.238	1	0	4.76	47123	33	2	2	2	2	6	6	12.2275	9.95803	10.4455	10.6507	10.9954	10.8819	10.9778	11.9882	12.784	11.5292	10.5808	10.2934	10.6742	11.0634	11.3406	0.476443	0.546635	1	+		-0.184802	0.618014	0	+		0.39043	0.508673	0	+		-0.270815	0.708461	1	+
sp|A2AM05|CNTLN_MOUSE	Cntln	Centlein OS=Mus musculus GN=Cntln PE=1 SV=1	28.113	1	0	0.93	160747	97	1	1	1	1	1	1	10.0276	9.99847	10.4455	10.6507	10.7898	10.8819	10.9778	11.9882	7.70998	10.785	10.5808	10.2934	10.8596	11.0634	11.3406	-0.438247	0.573068	16.5			-0.0715748	0.846031	0			0.878898	0.0340607	6.5			1.24557	0.20602	10
sp|Q9D2R6|COA3_MOUSE	Coa3	Cytochrome c oxidase assembly factor 3 homolog, mitochondrial OS=Mus musculus GN=Coa3 PE=1 SV=1	47.18	1	0	18.52	11987	6	2	2	2	2	5	5	10.5982	14.8606	10.4455	10.6507	10.7898	10.8819	10.9778	11.9882	9.13483	13.1647	10.5808	10.2934	10.8596	11.0634	11.3406	-0.845283	0.559991	2			-0.0715748	0.846031	1.66667			-0.479287	0.681098	1			0.294421	0.782875	2.66667
sp|Q5SU73|COIL_MOUSE	Coil	Coilin OS=Mus musculus GN=Coil PE=1 SV=1	51.675	1	0	4.04	61917	33	2	2	2	2	2	2	10.5982	9.99847	10.4455	10.6507	13.9599	10.8819	10.9778	11.9882	9.13483	10.785	10.5808	10.2934	14.0018	11.0634	11.3406	-0.224678	0.592191	1			0.183297	0.879893	0			1.52877	0.0810409	0			1.93674	0.0832503	1
sp|O88587|COMT_MOUSE	Comt	Catechol O-methyltransferase OS=Mus musculus GN=Comt PE=1 SV=2	31.09	1	0	4.91	29486	16	1	1	1	1	8	8	10.5982	12.3189	10.4455	10.6507	10.7898	10.8819	10.9778	11.9882	9.13483	13.8228	10.5808	10.2934	10.8596	11.0634	11.3406	-0.0453317	0.968384	1			-0.0715748	0.846031	0			0.15614	0.774746	1			0.129897	0.917639	0
sp|Q8BIG7|CMTD1_MOUSE	Comtd1	Catechol O-methyltransferase domain-containing protein 1 OS=Mus musculus GN=Comtd1 PE=1 SV=1	46.647	1	0	4.58	28961	16	1	1	1	1	4	4	10.5982	11.753	10.4455	10.6507	11.7957	10.8819	10.9778	14.1201	9.67232	12.9909	10.5808	10.2934	10.8596	11.6181	13.5037	0.0225394	0.978076	8	+		0.0499004	0.965827	0	+		1.08208	0.230733	3.5	+		1.10944	0.352659	4.5	+
sp|Q8CIE6|COPA_MOUSE	Copa	Coatomer subunit alpha OS=Mus musculus GN=Copa PE=1 SV=2	57.635	1	0	5.23	138432	76	6	6	6	6	14	14	13.4174	13.9226	14.9474	15.0593	11.308	13.2908	10.9778	12.6701	14.6644	13.6492	13.9674	14.6772	11.3248	13.9099	12.2615	-0.0970679	0.844798	17.5	+		0.43706	0.650204	0	+		-2.27494	0.0154281	9	+	+	-1.74081	0.0557796	8.5	+
sp|Q9JIF7|COPB_MOUSE	Copb1	Coatomer subunit beta OS=Mus musculus GN=Copb1 PE=1 SV=1	67.476	1	0	3.57	107066	57	3	3	3	3	26	26	15.2291	10.712	12.3021	11.6742	10.7898	10.8819	10.9778	11.9882	12.5135	12.1718	12.1489	12.5869	10.8596	11.0634	11.3406	-0.124047	0.903386	1	+		-0.0715748	0.846031	0			-1.31987	0.240089	0	+		-1.2674	0.000847097	1	+
sp|O55029|COPB2_MOUSE	Copb2	Coatomer subunit beta' OS=Mus musculus GN=Copb2 PE=1 SV=2	248.884	1	0	15.47	102449	53	10	10	10	10	38	38	14.7863	14.8456	15.8263	15.7817	11.3423	10.8819	10.9778	15.4985	14.8263	14.9805	15.9464	15.3587	11.133	14.1807	15.0251	-0.0320135	0.935454	8.66667	+		1.27112	0.474912	13.6667	+		-3.13485	0.0341888	11.8333	+	+	-1.83171	0.136086	10.5	+
sp|Q9QZE5|COPG1_MOUSE	Copg1	Coatomer subunit gamma-1 OS=Mus musculus GN=Copg1 PE=1 SV=1	129.401	1	0	9.38	97513	48	6	5	6	5	28	17	12.4873	12.6095	14.557	10.6507	11.2122	11.3425	12.0625	11.9882	14.6804	11.8732	14.3754	11.3741	11.3272	11.5039	11.3406	0.499668	0.682597	2	+		-0.26077	0.365927	0	+		-0.924774	0.306333	2	+		-1.68521	0.153799	0	+
sp|Q9QXK3|COPG2_MOUSE	Copg2	Coatomer subunit gamma-2 OS=Mus musculus GN=Copg2 PE=1 SV=1	69.911	1	0	2.18	97681	48	2	1	2	1	12	1	15.9386	19.0495	18.1352	10.6507	15.6484	20.1152	20.1446	11.9882	18.9616	19.2867	17.184	10.2934	13.119	19.0059	11.3406	0.487945	0.868202	50.5	+		-2.48561	0.44944	0	+		1.03062	0.718132	19.6667	+		-1.94294	0.564223	30.8333	+
sp|P61924|COPZ1_MOUSE	Copz1	Coatomer subunit zeta-1 OS=Mus musculus GN=Copz1 PE=1 SV=1	35.106	1	0	18.64	20198	5	2	2	2	2	4	4	15.5289	11.02	12.8585	10.6507	10.7898	10.8819	10.893	11.9882	13.0693	12.5524	12.6743	11.25	10.8596	11.0634	11.3406	-0.128009	0.917326	2	+		-0.0503718	0.893001	0			-1.37628	0.276696	2	+		-1.29865	0.0428462	0	+
sp|Q8R1S0|COQ6_MOUSE	Coq6	Ubiquinone biosynthesis monooxygenase COQ6, mitochondrial OS=Mus musculus GN=Coq6 PE=1 SV=3	17.32	1	0	1.89	51393	22	1	1	1	1	20	20	15.7329	17.5414	10.5669	17.7202	18.2182	15.1724	10.9778	18.2916	19.4653	16.0509	15.3012	17.0107	20.4671	15.1718	18.1674	1.56666	0.441039	5.5	+		2.27044	0.389166	0	+		0.274642	0.912595	1	+		0.978422	0.583802	4.5	+
sp|Q9WUM4|COR1C_MOUSE	Coro1c	Coronin-1C OS=Mus musculus GN=Coro1c PE=1 SV=2	148.189	1	0	11.18	53121	24	5	5	5	5	19	19	10.4691	14.3156	11.4943	10.6507	12.6804	14.8991	14.3778	11.9882	9.12407	15.3262	10.5808	10.2934	12.1217	13.2603	11.3406	-0.401286	0.813984	1	+		-1.2455	0.241807	0	+		1.75395	0.169905	1	+		0.909743	0.612426	0	+
sp|P19783|COX41_MOUSE	Cox4i1	Cytochrome c oxidase subunit 4 isoform 1, mitochondrial OS=Mus musculus GN=Cox4i1 PE=1 SV=2	289.826	1	0	42.01	19530	12	9	9	10	10	53	53	11.0442	18.6171	10.4455	14.2785	10.7898	15.1875	13.2271	14.7695	13.0709	18.9687	14.8026	14.5557	11.13	11.8395	13.5427	1.75316	0.46752	2	+		-1.32276	0.362579	0	+		-0.102844	0.962904	1	+		-3.17876	0.105792	1	+
sp|P12787|COX5A_MOUSE	Cox5a	Cytochrome c oxidase subunit 5A, mitochondrial OS=Mus musculus GN=Cox5a PE=1 SV=2	84.726	1	0	47.95	16101	12	5	5	5	5	20	20	10.5982	17.75	12.5067	14.1225	11.6649	12.0938	11.2057	11.93	14.9826	18.414	13.4542	10.9387	11.8343	12.5781	11.9686	0.703022	0.757835	7	+		0.403382	0.235005	0	+		-2.02077	0.234562	4	+		-2.32041	0.26729	3	+
sp|Q61147|CERU_MOUSE	Cp	Ceruloplasmin OS=Mus musculus GN=Cp PE=1 SV=2	1822.84	1	1	53.63	121151	55	49	49	55	55	1066	1066	19.4385	20.7697	20.0383	20.9145	19.1759	20.4352	20.3032	20.0545	18.7109	19.6486	20.014	21.1783	19.0255	20.102	20.4324	-0.402323	0.536979	4.5	+		-0.138925	0.787533	5.33333	+		-0.298045	0.527565	4.33333	+		-0.0346464	0.96247	5.5	+
sp|Q9JHH6|CBPB2_MOUSE	Cpb2	Carboxypeptidase B2 OS=Mus musculus GN=Cpb2 PE=1 SV=1	15.252	1	0	3.55	48871	22	1	1	1	1	1	1	10.5982	9.99847	10.4455	10.6507	10.7898	10.8819	10.9778	12.9962	9.13483	10.785	10.5808	10.5713	10.8596	11.0634	12.7189	-0.155225	0.717172	1			0.135867	0.871334	0			0.988236	0.12247	1			1.27933	0.113486	0
sp|O89001|CBPD_MOUSE	Cpd	Carboxypeptidase D OS=Mus musculus GN=Cpd PE=1 SV=2	93.537	1	0	3.85	152406	74	4	4	4	4	10	10	11.2123	13.9182	10.4455	10.6507	12.8678	10.6504	10.9778	11.9882	9.09893	13.6087	10.5808	10.2934	10.6487	11.0634	11.3406	-0.661174	0.616307	9.33333	+		-0.603519	0.374563	0	+		0.0644318	0.948049	4	+		0.122087	0.91943	5.33333	+
sp|Q812E0|CPEB2_MOUSE	Cpeb2	Cytoplasmic polyadenylation element-binding protein 2 OS=Mus musculus GN=Cpeb2 PE=1 SV=1	83.379	1	0	12.86	58442	26	5	1	5	1	12	1	10.5982	9.99847	11.8072	10.6507	10.7898	10.8819	10.9778	11.9882	11.0304	10.785	12.5329	10.9963	10.8596	11.0634	11.3406	0.572501	0.339849	7.5	+		-0.0715748	0.846031	0			0.395805	0.431779	1.5			-0.248271	0.634214	6	+
sp|Q7TN99|CPEB3_MOUSE	Cpeb3	Cytoplasmic polyadenylation element-binding protein 3 OS=Mus musculus GN=Cpeb3 PE=1 SV=1	121.85	1	0	12.29	78335	31	6	2	6	2	15	4	10.5982	9.99847	10.4455	10.6507	10.7898	10.8819	10.9778	11.9882	12.6842	10.785	10.5808	10.2934	10.8596	11.0634	11.3406	0.662662	0.283062	20.3333			-0.0715748	0.846031	0			0.736253	0.0585291	8.16667			0.00201589	0.997653	12.1667
sp|Q7TN98|CPEB4_MOUSE	Cpeb4	Cytoplasmic polyadenylation element-binding protein 4 OS=Mus musculus GN=Cpeb4 PE=1 SV=1	222.512	1	0	18.38	80122	30	10	7	10	7	47	39	12.8672	11.3159	15.717	10.6507	10.7898	10.8819	10.9778	11.9882	15.681	12.5665	14.838	10.2718	10.8596	11.0634	11.3406	0.701624	0.686826	11.5	+		-0.0715748	0.846031	8			-1.47824	0.249886	12	+		-2.25144	0.179508	7.5	+
sp|Q6NVF9|CPSF6_MOUSE	Cpsf6	Cleavage and polyadenylation specificity factor subunit 6 OS=Mus musculus GN=Cpsf6 PE=1 SV=1	204.311	1	0	15.06	59153	23	6	6	6	6	45	45	17.4093	14.9942	13.098	10.6507	13.6458	14.1477	12.1238	11.9882	16.3706	14.684	13.7848	10.2934	14.0707	13.194	11.3406	-0.254831	0.898847	15.8333	+		-0.107932	0.9121	0	+		-1.06167	0.5142	6.66667	+		-0.914772	0.604942	9.16667	+
sp|Q8BTV2|CPSF7_MOUSE	Cpsf7	Cleavage and polyadenylation specificity factor subunit 7 OS=Mus musculus GN=Cpsf7 PE=1 SV=2	38.746	1	0	7.64	52011	24	2	2	2	2	3	3	12.4569	9.99847	10.6248	10.6507	10.8527	10.8819	10.9778	11.9882	9.45164	10.785	9.80148	10.2934	10.839	11.0634	11.3406	-0.849828	0.209394	1	+		-0.0941928	0.795365	0			0.242465	0.698176	0	+		0.9981	0.0410172	1	+
sp|P97742|CPT1A_MOUSE	Cpt1a	Carnitine O-palmitoyltransferase 1, liver isoform OS=Mus musculus GN=Cpt1a PE=1 SV=4	10.182	1	0	2.98	88251	44	2	2	2	2	2	2	10.6939	12.6659	10.4455	10.6507	11.2941	10.8819	10.9778	11.9882	9.80774	13.7247	10.3449	10.2934	10.8922	11.0634	11.3406	-0.0712966	0.947641	1	+		-0.186795	0.579699	0			0.171544	0.776339	0	+		0.0560452	0.960367	1	+
sp|P52825|CPT2_MOUSE	Cpt2	Carnitine O-palmitoyltransferase 2, mitochondrial OS=Mus musculus GN=Cpt2 PE=1 SV=2	14.51	1	0	3.8	73981	44	1	1	1	1	1	1	10.5982	11.3213	10.4455	10.6507	10.7898	10.8819	10.9778	11.9882	9.13483	12.3818	10.5808	10.2934	10.8596	11.0634	11.3406	-0.156185	0.830671	2			-0.0715748	0.846031	0			0.405543	0.277716	2			0.490153	0.568457	0
sp|Q9DCT8|CRIP2_MOUSE	Crip2	Cysteine-rich protein 2 OS=Mus musculus GN=Crip2 PE=1 SV=1	323.691	1	0	63.46	22727	14	7	7	8	8	457	457	20.0693	19.4528	20.2458	19.2714	10.7898	12.5653	10.9778	11.9882	19.5047	19.2006	20.0253	19.2755	10.8596	12.3394	11.3406	-0.258307	0.422467	2.33333	+		-0.0670783	0.917666	0			-8.17954	2.68095e-06	0	+		-7.98831	7.94278e-06	2.33333	+
sp|P63154|CRNL1_MOUSE	Crnkl1	Crooked neck-like protein 1 OS=Mus musculus GN=Crnkl1 PE=1 SV=1	44.105	1	0	1.74	83416	46	1	1	1	1	4	4	10.5982	9.99847	10.4455	10.7378	10.7898	10.8819	10.9778	11.9882	9.13483	10.785	10.5808	10.2934	11.9297	11.0634	11.3406	-0.246469	0.5623	1			0.285125	0.500842	0			0.714463	0.0681317	1			1.24606	0.0503108	0
sp|Q3U182|CRTC2_MOUSE	Crtc2	CREB-regulated transcription coactivator 2 OS=Mus musculus GN=Crtc2 PE=1 SV=2	13.68	1	0	1.01	73216	20	1	1	1	1	2	2	12.953	9.62333	11.4344	10.6507	10.7898	10.8819	10.9778	11.9882	12.0399	10.3567	11.2947	10.2934	10.8596	11.0634	11.3406	-0.169157	0.842652	3	+		-0.0715748	0.846031	0			-0.00591358	0.994006	1	+		0.0916685	0.863455	2	+
sp|Q91X84|CRTC3_MOUSE	Crtc3	CREB-regulated transcription coactivator 3 OS=Mus musculus GN=Crtc3 PE=1 SV=2	85.249	1	0	8.4	67027	25	3	3	3	3	5	5	10.5982	13.1059	16.0679	10.6507	10.7898	10.8819	10.9778	11.9882	15.5044	12.3735	15.541	10.2934	10.8596	11.0634	11.3406	0.822446	0.66743	3.33333	+		-0.0715748	0.846031	0			-1.4462	0.31647	2	+		-2.34022	0.184523	1.33333	+
sp|P97784|CRY1_MOUSE	Cry1	Cryptochrome-1 OS=Mus musculus GN=Cry1 PE=1 SV=1	107.355	1	1	4.29	68001	34	2	2	2	2	20	20	11.4576	11.3289	10.4455	12.3349	10.7898	10.8819	10.9778	12.1086	12.3964	10.7114	10.5808	10.2934	10.8596	11.0634	11.3406	-0.396221	0.541618	1	+		-0.101665	0.801501	2			-0.20218	0.696974	1	+		0.0923766	0.878455	2	+
sp|P23927|CRYAB_MOUSE	Cryab	Alpha-crystallin B chain OS=Mus musculus GN=Cryab PE=1 SV=2	398.586	1	0	80.57	20069	13	13	13	14	14	62	62	17.6354	16.9237	16.1639	15.6989	14.499	16.2686	16.2543	12.4979	19.7331	16.9074	15.6965	17.2376	15.2395	14.1295	15.2889	0.788168	0.437751	1	+		0.00601436	0.995874	1	+		-1.72555	0.132696	1	+		-2.5077	0.0627532	1	+
sp|P47199|QOR_MOUSE	Cryz	Quinone oxidoreductase OS=Mus musculus GN=Cryz PE=1 SV=1	38.895	1	0	11.18	35269	21	2	2	2	2	11	11	11.8026	13.0969	13.1824	13.1951	10.7898	10.8819	10.9778	11.9882	12.5381	12.8917	13.3409	12.5042	10.8596	11.0634	11.3406	-0.000495339	0.999032	2	+		-0.0715748	0.846031	0			-1.6598	0.00921251	2	+		-1.73088	0.00112143	0	+
sp|Q9CZU6|CISY_MOUSE	Cs	Citrate synthase, mitochondrial OS=Mus musculus GN=Cs PE=1 SV=1	88.769	1	0	7.33	51737	21	3	3	3	3	14	14	11.2495	15.9885	10.8795	10.6507	10.7898	10.8819	10.9778	12.4883	12.9033	15.803	10.5808	10.9687	13.1744	11.0634	11.3406	0.371905	0.838164	3	+		0.574974	0.467248	0			-0.907575	0.52162	2	+		-0.704506	0.661804	1	+
sp|Q91W50|CSDE1_MOUSE	Csde1	Cold shock domain-containing protein E1 OS=Mus musculus GN=Csde1 PE=1 SV=1	149.822	1	0	7.64	88791	53	5	5	5	5	8	8	13.3533	13.6806	12.7641	13.7972	10.9015	10.8819	10.9778	12.1315	13.048	14.1936	12.899	14.5943	10.8596	11.0634	11.3406	0.284919	0.573609	2.5	+		-0.135309	0.734674	0	+		-2.17563	0.00126002	1.5	+		-2.59586	0.00378812	1	+
sp|Q9ERK4|XPO2_MOUSE	Cse1l	Exportin-2 OS=Mus musculus GN=Cse1l PE=1 SV=1	77.321	1	0	7.11	110455	56	6	6	6	6	43	43	16.9703	17.5506	10.5669	17.7202	18.2182	15.1724	10.9778	18.2916	19.4945	16.0667	15.7089	17.0107	20.4671	15.1718	18.1674	1.36818	0.502728	16.3333	+		2.27044	0.389166	0	+		-0.0369894	0.988368	6.5	+		0.865276	0.618761	9.83333	+
sp|Q8BK63|KC1A_MOUSE	Csnk1a1	Casein kinase I isoform alpha OS=Mus musculus GN=Csnk1a1 PE=1 SV=2	60.313	1	0	6.23	38915	21	1	1	1	1	2	2	9.87903	9.02862	10.4455	10.4046	10.7898	10.8819	10.9778	12.3315	8.0278	10.785	10.5808	9.97031	10.8596	11.0634	11.3406	-0.0984402	0.894258	1	+		-0.157402	0.738722	0			1.30586	0.0376275	0	+		1.2469	0.15862	1	+
sp|Q60737|CSK21_MOUSE	Csnk2a1	Casein kinase II subunit alpha OS=Mus musculus GN=Csnk2a1 PE=1 SV=2	76.124	1	0	16.88	45134	20	4	4	4	4	6	6	10.5982	12.246	12.2605	10.6507	10.7898	16.4289	15.2221	11.9882	12.4514	10.7802	12.2437	14.235	13.1834	12.7618	12.1963	0.988735	0.288892	8	+		-0.893415	0.598028	0	+		2.16843	0.174418	5	+		0.286283	0.755769	3	+
sp|P67871|CSK2B_MOUSE	Csnk2b	Casein kinase II subunit beta OS=Mus musculus GN=Csnk2b PE=1 SV=1	94.873	1	0	16.74	24942	11	4	4	5	5	22	22	13.2229	12.0174	13.5194	11.5891	16.603	15.4327	14.3602	12.9438	12.9093	13.206	13.0191	13.1781	16.9732	15.2949	13.1978	0.49092	0.336618	2	+		0.320395	0.814848	0	+		2.24771	0.047982	0	+		2.07718	0.0729738	2	+
sp|P97315|CSRP1_MOUSE	Csrp1	Cysteine and glycine-rich protein 1 OS=Mus musculus GN=Csrp1 PE=1 SV=3	340.012	1	0	64.25	20583	15	8	8	8	8	127	127	14.5331	17.4735	17.3688	17.0505	10.7898	11.4925	10.9778	12.3703	15.7532	15.4307	17.3615	17.3199	10.8596	11.0634	13.1292	-0.140124	0.876365	1	+		0.276466	0.722897	0	+		-5.19884	0.000557618	1	+		-4.78225	0.0025201	0	+
sp|P97314|CSRP2_MOUSE	Csrp2	Cysteine and glycine-rich protein 2 OS=Mus musculus GN=Csrp2 PE=1 SV=3	269.816	1	0	51.3	20926	14	7	7	8	8	58	58	15.9503	16.3531	16.5674	15.5472	10.7898	13.4911	10.9778	11.9882	15.8597	16.3647	16.4549	15.5416	10.8596	12.3291	11.3406	-0.0492797	0.879674	5.66667	+		-0.301966	0.726644	6			-4.29275	0.000620865	6.66667	+	+	-4.54544	0.000150666	5	+	+
sp|P50462|CSRP3_MOUSE	Csrp3	Cysteine and glycine-rich protein 3 OS=Mus musculus GN=Csrp3 PE=1 SV=1	230.99	1	0	38.66	20895	14	6	6	6	6	24	24	13.728	11.3352	12.2204	10.6507	11.2087	10.8819	10.9778	12.585	16.459	11.589	11.4275	10.2934	15.1438	11.7769	11.3406	0.458689	0.773333	2	+		1.34038	0.281002	0	+		-0.570197	0.488925	0	+		0.311497	0.876648	2	+
sp|Q99LI7|CSTF3_MOUSE	Cstf3	Cleavage stimulation factor subunit 3 OS=Mus musculus GN=Cstf3 PE=1 SV=1	29.418	1	0	3.77	82877	40	2	2	2	2	2	2	14.4761	13.0839	14.854	13.0718	10.7898	15.3584	15.8706	14.4942	9.70118	12.5008	14.5218	12.483	20.7021	14.5034	16.1403	-1.56975	0.201227	1.66667	+		2.987	0.207237	0	+		0.256811	0.842641	1.66667	+		4.81357	0.0561336	0	+
sp|Q8R311|CTGE5_MOUSE	Ctage5	Endoplasmic reticulum export factor CTAGE5 OS=Mus musculus GN=Ctage5 PE=2 SV=1	11.34	2	0	0.9	87718	61	1	1	1	1	1	1	12.7171	11.1273	11.1993	13.7804	10.7898	10.8819	10.9778	11.9882	13.1785	10.785	10.5808	13.8784	10.8596	11.0634	11.3406	-0.100383	0.927085	4	+		-0.0715748	0.846031	0			-1.04659	0.184553	1.33333	+		-1.01778	0.3531	2.66667	+
sp|P26231|CTNA1_MOUSE	Ctnna1	Catenin alpha-1 OS=Mus musculus GN=Ctnna1 PE=1 SV=1	268.151	1	1	15.45	100106	55	9	9	9	9	33	33	16.1964	15.0699	9.65723	13.2019	11.1882	10.8819	10.9778	11.9882	15.0987	15.1663	12.4346	14.898	10.8596	12.4369	10.7673	0.868044	0.601477	55.8333	+		0.0955713	0.86699	40	+		-2.27231	0.168954	45.1667	+		-3.04478	0.0196333	50.6667	+	+
sp|Q02248|CTNB1_MOUSE	Ctnnb1	Catenin beta-1 OS=Mus musculus GN=Ctnnb1 PE=1 SV=1	76.001	1	0	6.66	85471	43	4	4	4	4	8	8	10.5982	12.9883	10.4455	10.6507	10.7898	10.8819	10.9778	11.9882	9.13483	12.7239	10.5808	10.2934	10.8596	11.0634	11.3406	-0.487403	0.631171	2			-0.0715748	0.846031	0			-0.0111927	0.987183	2			0.404636	0.66957	0
sp|P30999|CTND1_MOUSE	Ctnnd1	Catenin delta-1 OS=Mus musculus GN=Ctnnd1 PE=1 SV=2	34.045	1	0	1.28	104925	55	1	1	1	1	7	7	10.5982	12.2365	10.4455	10.6507	10.7898	10.8819	10.9778	11.9882	9.13483	12.8244	10.5808	10.2934	10.8596	11.0634	11.3406	-0.274332	0.765397	64.6667			-0.0715748	0.846031	0			0.176745	0.737974	20.5			0.379502	0.697136	44.1667
sp|P70698|PYRG1_MOUSE	Ctps1	CTP synthase 1 OS=Mus musculus GN=Ctps1 PE=1 SV=2	179.186	1	1	15.23	66682	35	8	8	8	8	30	30	16.1047	14.5175	13.4154	13.3406	10.7898	10.8819	10.9778	11.9882	15.0905	13.8949	12.9764	14.4154	10.8596	11.0634	11.3406	-0.250239	0.760541	4.5	+		-0.0715748	0.846031	0			-3.18509	0.00397581	2	+		-3.00642	0.00257852	2.5	+
sp|P18242|CATD_MOUSE	Ctsd	Cathepsin D OS=Mus musculus GN=Ctsd PE=1 SV=1	109.117	1	0	6.83	44954	20	2	2	3	3	12	12	12.9529	12.7397	14.4352	10.6507	13.2088	12.502	13.4115	12.9477	10.6546	13.6333	14.2323	11.3434	14.4728	15.1837	12.1483	-0.228714	0.850899	5	+		0.917464	0.304039	0	+		0.322854	0.701587	3	+		1.46903	0.303355	2	+
sp|Q60598|SRC8_MOUSE	Cttn	Src substrate cortactin OS=Mus musculus GN=Cttn PE=1 SV=2	33.337	1	0	2.38	61250	29	1	1	1	1	3	3	10.5982	11.9231	10.788	10.6507	10.7898	10.8819	10.9778	11.9882	9.13483	13.5832	11.6448	10.2934	11.4232	11.0634	11.3406	0.174067	0.868289	5.66667	+		0.116278	0.747919	0			0.169463	0.700369	1	+		0.111673	0.925405	4.66667	+
sp|Q3U308|CTU2_MOUSE	Ctu2	Cytoplasmic tRNA 2-thiolation protein 2 OS=Mus musculus GN=Ctu2 PE=1 SV=1	33.886	1	0	5.25	56105	28	2	2	2	2	7	7	13.4677	9.28635	10.4455	10.6507	10.7898	10.8819	10.9778	11.9882	11.8636	10.785	10.5808	10.2934	10.8596	11.0634	11.3406	-0.0818189	0.93426	6.5	+		-0.0715748	0.846031	0			0.196913	0.839358	3	+		0.207157	0.644311	3.5
sp|Q9D4H8|CUL2_MOUSE	Cul2	Cullin-2 OS=Mus musculus GN=Cul2 PE=1 SV=2	90.598	1	0	6.71	86877	49	5	5	5	5	11	11	10.5999	11.2729	14.6646	11.372	10.7898	10.8819	10.9778	11.9882	9.47838	10.7664	14.1628	11.5639	10.8596	11.0634	12.1326	-0.484497	0.73098	2.5	+		0.19244	0.6973	0			-0.817914	0.424039	1.5	+		-0.140977	0.912149	1	+
sp|A2A432|CUL4B_MOUSE	Cul4b	Cullin-4B OS=Mus musculus GN=Cul4b PE=1 SV=1	76.806	1	0	2.89	110699	64	2	2	2	2	13	13	12.4327	9.99847	10.4455	10.6507	11.0804	10.8819	10.9778	11.9882	10.0242	10.785	10.5808	10.2934	10.8596	11.0634	11.3406	-0.460964	0.441779	1			-0.144219	0.674636	0			0.350278	0.575913	0			0.667023	0.0331469	1
sp|P97792|CXAR_MOUSE	Cxadr	Coxsackievirus and adenovirus receptor homolog OS=Mus musculus GN=Cxadr PE=1 SV=1	30.297	1	0	2.47	39948	21	1	1	1	1	1	1	10.5982	11.9461	10.4455	10.6507	11.4842	10.8819	10.5135	11.9882	9.13483	12.8524	10.5808	10.2934	10.8596	11.0634	11.3406	-0.194742	0.826835	17.6667			-0.129083	0.761508	0	+		0.306842	0.543608	11	+		0.372501	0.704633	6.66667
sp|P56395|CYB5_MOUSE	Cyb5a	Cytochrome b5 OS=Mus musculus GN=Cyb5a PE=1 SV=2	18.097	1	0	15.67	15241	8	1	1	1	1	2	2	10.5982	12.8388	10.4455	10.6507	10.7898	10.8819	10.9778	11.9882	9.13483	12.3873	12.6133	10.2934	10.8596	12.0355	11.3406	-0.0260706	0.980339	39	+		0.252462	0.588004	0			0.0261809	0.968437	15			0.304713	0.780001	24	+
sp|Q9CQX2|CYB5B_MOUSE	Cyb5b	Cytochrome b5 type B OS=Mus musculus GN=Cyb5b PE=1 SV=1	149.695	1	0	41.1	16318	8	4	4	4	4	23	23	10.5982	16.4406	10.4455	11.4018	10.7898	10.8819	10.9778	11.9882	9.74865	16.7902	10.5808	10.8578	10.8596	11.0634	11.8418	-0.227143	0.919396	2	+		0.0954787	0.826843	0			-1.06206	0.491219	0	+		-0.739442	0.717131	2	+
sp|Q9DCN2|NB5R3_MOUSE	Cyb5r3	NADH-cytochrome b5 reductase 3 OS=Mus musculus GN=Cyb5r3 PE=1 SV=3	183.063	1	0	28.24	34128	18	7	7	8	8	30	30	14.8909	17.848	13.3775	12.2042	12.9568	14.1475	13.1927	12.3688	13.9956	18.3751	14.6479	10.3616	15.0655	14.2802	12.2132	-0.235104	0.912229	7.5	+		0.686476	0.448734	0	+		-1.41368	0.310017	2	+		-0.492102	0.821376	5.5	+
sp|Q9D0M3|CY1_MOUSE	Cyc1	Cytochrome c1, heme protein, mitochondrial OS=Mus musculus GN=Cyc1 PE=1 SV=1	382.94	1	0	34.46	35328	16	8	8	11	11	44	44	12.2999	17.3814	10.4455	10.6507	12.6856	10.8819	10.9778	11.9882	9.80419	17.7268	10.5808	10.2934	10.8596	11.7627	11.3406	-0.593056	0.819027	10	+		-0.312414	0.597497	0			-1.06097	0.549357	3.5	+		-0.780329	0.741479	6.5	+
sp|Q7TMB8|CYFP1_MOUSE	Cyfip1	Cytoplasmic FMR1-interacting protein 1 OS=Mus musculus GN=Cyfip1 PE=1 SV=1	95.003	1	1	3.75	145241	73	4	4	4	4	19	19	11.6332	14.8244	13.9122	12.8736	11.4151	13.4158	13.8451	11.9882	12.8524	14.1397	13.4551	12.7524	10.8596	14.0657	11.3406	-0.0109953	0.988891	1	+		-0.577421	0.615074	0	+		-0.64482	0.498817	0	+		-1.21125	0.243773	1	+
sp|Q64459|CP3AB_MOUSE	Cyp3a11	Cytochrome P450 3A11 OS=Mus musculus GN=Cyp3a11 PE=1 SV=1	19.686	2	0	1.59	57855	24	1	1	1	1	52	52	19.1863	16.7866	18.1551	18.1784	20.3955	19.2772	19.4747	15.7275	16.3896	17.6536	17.8817	17.4521	19.6616	19.8233	18.6528	-0.732351	0.262981	7.16667	+		0.66049	0.620515	0	+		0.642114	0.593191	3.5	+		2.03495	0.00936137	3.66667	+
sp|Q8K0C4|CP51A_MOUSE	Cyp51a1	Lanosterol 14-alpha demethylase OS=Mus musculus GN=Cyp51a1 PE=1 SV=1	19.078	1	0	2.19	56776	27	1	1	1	1	4	4	10.5982	12.1039	10.4455	10.6507	10.7898	10.8819	10.9778	11.9882	9.13483	12.8302	10.5808	10.2934	10.8596	11.0634	11.3406	-0.239753	0.790807	1			-0.0715748	0.846031	0			0.209884	0.675486	0			0.378062	0.698685	1
sp|Q0PHV7|DACT3_MOUSE	Dact3	Dapper homolog 3 OS=Mus musculus GN=Dact3 PE=1 SV=1	20.457	1	0	1.8	63287	29	1	1	1	1	1	1	12.5908	9.18946	11.7151	10.6507	10.7898	10.8819	10.9778	11.9882	11.1429	10.785	11.8335	10.2934	10.8596	11.0634	11.3406	-0.0227878	0.978223	2	+		-0.0715748	0.846031	0			0.122946	0.880487	1	+		0.0741587	0.860453	1	+
sp|Q62165|DAG1_MOUSE	Dag1	Dystroglycan OS=Mus musculus GN=Dag1 PE=1 SV=4	73.306	1	0	2.35	96905	44	2	2	2	2	5	5	10.5982	14.1202	10.4455	10.6507	11.3706	10.8819	10.9778	11.9882	9.13588	14.0985	10.5808	10.2934	10.8596	11.0634	11.3406	-0.426485	0.769662	9.5	+		-0.216776	0.527299	0			-0.148983	0.87729	4.5			0.0607258	0.963765	5	+
sp|Q91WC9|DGLB_MOUSE	Daglb	Sn1-specific diacylglycerol lipase beta OS=Mus musculus GN=Daglb PE=1 SV=2	14.581	1	0	1.49	73905	32	1	1	1	1	2	2	10.5982	11.858	10.4455	10.6507	10.7898	10.8819	10.9778	11.9882	9.13483	11.3453	10.5808	10.2934	10.8596	11.0634	11.3406	-0.549478	0.366568	12.5			-0.0715748	0.846031	7.83333			0.271373	0.550522	9.5			0.749276	0.234862	10.8333
sp|Q9ER88|RT29_MOUSE	Dap3	28S ribosomal protein S29, mitochondrial OS=Mus musculus GN=Dap3 PE=1 SV=1	29.992	1	0	3.07	44699	25	1	1	1	1	1	1	10.5982	11.5244	10.4455	10.6507	10.7898	10.8819	10.9778	11.9882	9.13483	12.1839	10.5808	10.2934	10.8596	11.0634	11.3406	-0.256429	0.716742	1			-0.0715748	0.846031	0			0.354767	0.375228	0			0.539621	0.505492	1
sp|Q922B2|SYDC_MOUSE	Dars	Aspartate--tRNA ligase, cytoplasmic OS=Mus musculus GN=Dars PE=1 SV=2	263.228	1	0	34.73	57147	39	15	15	15	15	83	83	17.2941	16.9756	14.7512	15.4291	11.7868	14.0982	12.3559	14.1007	16.6093	16.966	15.0116	16.6702	14.133	11.3634	13.9845	0.201754	0.79762	11.1667	+		0.0748674	0.944982	11.5	+		-3.0271	0.012106	16.6667	+	+	-3.15399	0.0183607	6	+	+
sp|Q9JII5|DAZP1_MOUSE	Dazap1	DAZ-associated protein 1 OS=Mus musculus GN=Dazap1 PE=1 SV=2	39.995	1	0	3.69	43214	13	1	1	1	1	13	13	12.6994	12.0828	11.6991	10.6507	11.8225	12.6092	11.4152	11.9882	10.823	11.9483	11.5417	10.2934	12.2969	12.314	11.3406	-0.631388	0.30763	0	+		0.0250463	0.952278	1	+		0.175785	0.735356	1	+		0.832219	0.165387	0	+
sp|Q923B1|DBR1_MOUSE	Dbr1	Lariat debranching enzyme OS=Mus musculus GN=Dbr1 PE=1 SV=2	30.763	1	0	4	62289	28	1	1	1	1	2	2	10.5982	9.99847	13.0495	10.6507	10.7898	10.8819	10.9778	11.9882	9.13483	12.0333	12.8636	10.2934	10.8596	11.0634	11.3406	0.00707973	0.994975	61.3333	+		-0.0715748	0.846031	11			0.0852421	0.910878	23.5			0.00658758	0.99501	48.8333	+
sp|P53395|ODB2_MOUSE	Dbt	Lipoamide acyltransferase component of branched-chain alpha-keto acid dehydrogenase complex, mitochondrial OS=Mus musculus GN=Dbt PE=1 SV=2	119.896	1	0	16.18	53247	32	6	6	6	6	20	20	12.3433	14.1336	11.9943	10.6507	13.1293	12.3625	11.7678	12.4934	10.8167	15.592	11.2087	11.0185	12.7631	12.0422	12.3633	-0.12149	0.931374	31.5	+		-0.0487239	0.901334	0	+		0.157785	0.844383	13.1667	+		0.230551	0.872815	18.3333	+
sp|P61963|DCAF7_MOUSE	Dcaf7	DDB1- and CUL4-associated factor 7 OS=Mus musculus GN=Dcaf7 PE=1 SV=1	13.61	1	0	2.63	38926	16	1	1	1	1	1	1	13.1954	10.6278	12.2462	11.3432	10.7898	10.8819	10.9778	11.9882	12.2689	11.0933	11.3039	10.799	10.8596	11.0634	11.3406	-0.486894	0.476367	10.5	+		-0.0715748	0.846031	0			-0.693709	0.307806	5.5	+		-0.27839	0.511517	5	+
sp|Q8N7N5|DCAF8_MOUSE	Dcaf8	DDB1- and CUL4-associated factor 8 OS=Mus musculus GN=Dcaf8 PE=1 SV=1	52.463	1	0	3.89	66031	32	2	2	2	2	16	16	11.3252	10.7677	13.6775	10.6507	10.7898	10.8819	10.9778	11.9882	11.2044	10.785	12.8639	10.636	10.8596	11.0634	11.3406	-0.232952	0.798312	48	+		-0.0715748	0.846031	1			-0.445819	0.578527	20	+		-0.284442	0.663854	29	+
sp|Q3U1J4|DDB1_MOUSE	Ddb1	DNA damage-binding protein 1 OS=Mus musculus GN=Ddb1 PE=1 SV=2	183.129	1	0	7.11	126853	58	5	5	5	5	13	13	11.181	13.1983	15.7783	10.6507	10.7898	10.8819	10.9778	11.9882	14.3685	11.7294	15.3603	11.1478	11.3	11.4901	11.3406	0.449423	0.780873	1	+		0.217441	0.543224	0	+		-1.54262	0.244597	0	+		-1.7746	0.200382	1	+
sp|Q80YA3|DDHD1_MOUSE	Ddhd1	Phospholipase DDHD1 OS=Mus musculus GN=Ddhd1 PE=1 SV=1	46.11	1	0	7.5	61823	35	3	3	3	3	6	6	11.8147	10.5212	10.4455	10.6507	10.7898	10.8819	10.9778	11.9882	13.1499	13.2397	10.5808	10.2934	10.8596	11.0634	11.3406	0.957952	0.308358	0	+		-0.0715748	0.846031	5			0.301444	0.505503	2	+		-0.728083	0.478869	3	+
sp|A2ADY9|DDI2_MOUSE	Ddi2	Protein DDI1 homolog 2 OS=Mus musculus GN=Ddi2 PE=1 SV=1	14.291	1	0	2.26	44591	25	1	1	1	1	1	1	12.4405	9.09728	10.2039	10.6507	10.7898	10.8819	10.9778	11.9882	9.78979	10.1545	10.0073	10.6805	10.8596	11.0634	11.3406	-0.440048	0.563985	1	+		-0.0715748	0.846031	0			0.561364	0.482117	1	+		0.929837	0.0143277	0	+
sp|O54734|OST48_MOUSE	Ddost	Dolichyl-diphosphooligosaccharide--protein glycosyltransferase 48 kDa subunit OS=Mus musculus GN=Ddost PE=1 SV=2	252.79	1	0	31.75	49028	25	10	10	10	10	27	27	15.4175	17.7835	10.859	11.6553	10.7898	10.8819	12.4204	11.9882	11.3088	17.3172	15.3101	11.3296	11.4198	14.3684	11.3406	-0.112403	0.961093	11.3333	+		0.856183	0.41407	25.6667	+		-2.40873	0.200291	26.1667	+		-1.44015	0.495396	10.8333	+
sp|Q91VR5|DDX1_MOUSE	Ddx1	ATP-dependent RNA helicase DDX1 OS=Mus musculus GN=Ddx1 PE=1 SV=1	845.047	1	0	49.19	82500	46	31	31	36	36	315	315	20.3901	18.2173	19.0702	17.7388	14.8772	15.6087	14.6026	15.0135	19.474	18.2763	19.0709	17.5574	15.3946	16.3647	13.7819	-0.259462	0.731165	28.6667	+		0.154934	0.828406	3	+		-3.82861	0.00082114	18	+	+	-3.41422	0.00824034	13.6667	+	+
sp|Q501J6|DDX17_MOUSE	Ddx17	Probable ATP-dependent RNA helicase DDX17 OS=Mus musculus GN=Ddx17 PE=1 SV=1	592.454	1	0	25.54	72399	36	15	9	18	9	204	78	12.1472	13.8301	12.6575	11.4037	16.1781	14.9943	15.5266	16.5454	14.0625	14.5499	13.4913	14.4719	16.7483	16.042	15.8008	1.63428	0.0275231	27.3333	+	+	0.385934	0.450437	0	+		3.30149	0.00171767	16.8333	+	+	2.05314	0.00269206	10.5	+	+
sp|Q61655|DD19A_MOUSE	Ddx19a	ATP-dependent RNA helicase DDX19A OS=Mus musculus GN=Ddx19a PE=1 SV=2	341.819	1	1	24.48	53933	34	11	11	13	13	81	81	18.3867	16.5972	12.5082	15.2716	16.2547	11.1711	10.4984	11.9882	15.6598	16.1509	12.2567	14.0996	10.7223	11.0534	11.3406	-1.14918	0.47768	4.66667	+		-1.43932	0.39282	0	+		-3.21283	0.123118	3.66667	+		-3.50297	0.0206309	1	+
sp|Q8VDW0|DX39A_MOUSE	Ddx39a	ATP-dependent RNA helicase DDX39A OS=Mus musculus GN=Ddx39a PE=1 SV=1	138.266	1	0	20.14	49067	24	8	3	8	3	20	4	10.5982	9.99847	10.4455	10.6507	12.1772	11.9305	12.9046	13.3788	9.23365	10.785	10.5808	10.2934	14.7756	13.5359	12.8444	-0.199973	0.613365	5.33333			1.12088	0.127951	10.1667	+		2.17457	0.000986079	9.5	+	+	3.49543	0.00251319	6	+	+
sp|Q9Z1N5|DX39B_MOUSE	Ddx39b	Spliceosome RNA helicase Ddx39b OS=Mus musculus GN=Ddx39b PE=1 SV=1	170.907	1	0	24.77	49035	24	9	4	9	4	24	8	10.5982	11.7548	14.9672	12.5278	10.7898	16.1822	16.2341	13.9876	13.7925	11.1908	13.8174	10.2934	10.8596	14.974	11.3406	-0.188475	0.888815	17	+		-1.90703	0.353495	0	+		1.83644	0.289249	10.5	+		0.117888	0.941336	6.5	+
sp|Q62167|DDX3X_MOUSE	Ddx3x	ATP-dependent RNA helicase DDX3X OS=Mus musculus GN=Ddx3x PE=1 SV=3	1617.99	1	2	64.2	73101	41	43	14	54	14	1049	265	18.9894	17.3493	19.7046	18.6426	14.0638	14.2167	14.5369	15.3227	19.6615	17.3916	20.0472	18.9805	14.2931	14.7478	15.2978	0.348681	0.664895	20.5	+		0.244515	0.578061	0	+		-4.13647	0.000338954	9.33333	+	+	-4.24063	0.00219362	11.1667	+	+
sp|Q62095|DDX3Y_MOUSE	Ddx3y	ATP-dependent RNA helicase DDX3Y OS=Mus musculus GN=Ddx3y PE=1 SV=2	1218.06	1	1	41.34	73428	45	30	1	41	1	794	10	10.5982	11.6836	16.0926	10.6507	10.7898	10.8819	10.9778	13.2467	15.1316	11.9019	15.6017	12.4134	10.8596	11.235	11.3406	1.50589	0.384325	20.6667	+		-0.329015	0.663064	13.6667			-0.782174	0.604424	21.6667	+		-2.61708	0.0658875	12.6667	+
sp|Q569Z5|DDX46_MOUSE	Ddx46	Probable ATP-dependent RNA helicase DDX46 OS=Mus musculus GN=Ddx46 PE=1 SV=2	36.131	1	0	3	117448	59	3	3	3	3	10	10	15.4821	12.9376	13.2289	12.6545	15.2196	14.4046	14.1222	14.016	12.1551	13.5511	13.3787	11.8841	13.9977	14.475	12.5918	-0.833506	0.321736	119.167	+		-0.752438	0.245621	15.3333	+		0.86484	0.26356	57.8333	+		0.945908	0.2276	76.6667	+
sp|Q4FZF3|DDX49_MOUSE	Ddx49	Probable ATP-dependent RNA helicase DDX49 OS=Mus musculus GN=Ddx49 PE=2 SV=1	20.992	1	0	2.71	54094	30	1	1	1	1	1	1	10.2532	9.99847	10.4455	10.6507	10.7898	10.8819	10.9778	11.9882	8.82879	10.785	10.5808	10.2934	10.8596	11.0634	11.3406	-0.214947	0.659518	11			-0.0715748	0.846031	0			0.822494	0.0385699	4.5			0.965867	0.131783	6.5
sp|Q61656|DDX5_MOUSE	Ddx5	Probable ATP-dependent RNA helicase DDX5 OS=Mus musculus GN=Ddx5 PE=1 SV=2	531.553	1	0	27.69	69290	36	15	9	18	9	217	91	12.244	16.1011	15.7796	15.7594	13.0681	15.6272	15.7196	15.0978	16.2139	15.4788	16.0004	15.6081	15.5499	16.9766	16.22	0.854284	0.392864	0	+		1.37068	0.15107	10.3333	+		-0.0928689	0.935602	5	+		0.42353	0.337568	5.33333	+
sp|Q8K4L0|DDX54_MOUSE	Ddx54	ATP-dependent RNA helicase DDX54 OS=Mus musculus GN=Ddx54 PE=1 SV=1	20.9	1	0	2.63	97748	53	2	2	2	2	2	2	10.5982	9.99847	10.4455	10.6507	12.0116	10.8759	10.6103	11.4464	9.00138	10.785	10.5808	10.2934	11.3527	11.1603	9.97078	-0.258041	0.568035	6			-0.408117	0.465328	0	+		0.812856	0.0567068	3	+		0.662779	0.31697	3	+
sp|Q9D0R4|DDX56_MOUSE	Ddx56	Probable ATP-dependent RNA helicase DDX56 OS=Mus musculus GN=Ddx56 PE=2 SV=1	51.268	1	0	2.56	61212	32	1	1	1	1	3	3	12.2189	9.65504	10.4455	10.6507	11.0176	10.8819	10.9778	11.9882	10.5297	11.6349	10.5808	10.2934	10.8596	11.0634	11.3406	0.0172052	0.978562	4	+		-0.128525	0.711084	0			0.473889	0.456856	0	+		0.328158	0.417858	4	+
sp|P54823|DDX6_MOUSE	Ddx6	Probable ATP-dependent RNA helicase DDX6 OS=Mus musculus GN=Ddx6 PE=1 SV=1	639.796	1	0	44.51	54192	33	17	17	18	18	162	162	17.7587	17.718	19.4257	13.6142	14.3328	14.4936	14.3621	13.0899	18.7232	17.5392	18.8283	17.2729	12.8998	11.8904	13.8603	0.961765	0.487432	29.3333	+		-1.18607	0.111401	0	+		-3.05956	0.0540317	13.3333	+		-5.20739	0.000567696	16	+	+
sp|Q9CQ62|DECR_MOUSE	Decr1	2,4-dienoyl-CoA reductase, mitochondrial OS=Mus musculus GN=Decr1 PE=1 SV=1	13.448	1	0	3.88	36214	24	1	1	1	1	2	2	10.5982	13.1419	13.7237	14.0927	10.7898	13.8453	14.3205	13.1483	12.6543	12.6397	14.6761	10.2934	10.8596	14.5602	11.3406	-0.323218	0.795577	90.6667	+		-0.772502	0.59006	108.667	+		0.136841	0.906021	96	+		-0.312443	0.836594	103.333	+
sp|A6H8H2|DEN4C_MOUSE	Dennd4c	DENN domain-containing protein 4C OS=Mus musculus GN=Dennd4c PE=1 SV=1	94.55	1	0	2.94	211458	101	5	5	5	5	13	13	15.6365	11.8839	12.0276	13.1648	10.7898	13.59	12.3218	14.1503	14.4843	12.0079	10.5808	13.1401	12.8064	12.4175	13.8599	-0.624921	0.621416	1.5	+		0.314969	0.75466	0	+		-0.465245	0.698568	1.5	+		0.474644	0.668965	0	+
sp|P31001|DESM_MOUSE	Des	Desmin OS=Mus musculus GN=Des PE=1 SV=3	717.952	1	3	49.04	53498	36	20	15	21	16	263	117	15.5037	15.1522	16.2433	16.5153	20.143	16.8772	18.8367	15.9548	15.2834	16.2971	14.6856	15.7946	19.0193	19.0106	16.7833	-0.338433	0.497359	32.1667	+		0.318124	0.813631	1	+		2.0993	0.0798855	13.5	+		2.75586	0.0139784	19.6667	+	+
sp|O88455|DHCR7_MOUSE	Dhcr7	7-dehydrocholesterol reductase OS=Mus musculus GN=Dhcr7 PE=1 SV=1	33.586	1	0	2.76	53919	15	1	1	1	1	2	2	10.5982	12.9791	10.4455	10.6507	10.7898	10.8819	10.9778	11.9882	9.13483	10.785	10.5808	10.2934	10.8596	11.0634	11.3406	-0.969829	0.220121	1			-0.0715748	0.846031	0			-0.00889725	0.989779	0			0.889357	0.105937	1
sp|O35435|PYRD_MOUSE	Dhodh	Dihydroorotate dehydrogenase (quinone), mitochondrial OS=Mus musculus GN=Dhodh PE=1 SV=2	130.516	1	0	20.76	42700	22	6	6	6	6	27	27	11.5061	14.565	10.4455	10.6507	11.2129	10.8819	10.9778	11.9882	13.1624	16.4148	10.5808	10.2934	11.0391	11.0634	11.3406	0.821049	0.648418	23.8333	+		-0.117548	0.71807	0			-0.526569	0.612145	4.16667	+		-1.46517	0.424193	19.6667	+
sp|Q99L04|DHRS1_MOUSE	Dhrs1	Dehydrogenase/reductase SDR family member 1 OS=Mus musculus GN=Dhrs1 PE=1 SV=1	18.587	1	0	3.51	34005	21	1	1	1	1	3	3	10.5982	11.1479	10.4455	10.6507	14.0641	13.4237	14.6913	11.9882	9.13483	11.9003	10.5808	10.6441	12.3176	11.0248	11.3406	-0.145524	0.811976	4.33333	+		-1.98081	0.0475673	0	+		2.83129	0.00322414	2	+		0.995999	0.238259	2.33333	+
sp|Q99LB2|DHRS4_MOUSE	Dhrs4	Dehydrogenase/reductase SDR family member 4 OS=Mus musculus GN=Dhrs4 PE=1 SV=3	459.059	1	0	65.59	29885	18	16	16	16	16	331	331	17.7032	11.64	14.1083	11.3349	20.4757	15.0239	16.4863	13.2321	17.5661	11.4943	13.6681	13.3563	22.1288	15.8096	12.1881	0.324638	0.873134	95.6667	+		0.404349	0.899322	85.3333	+		2.60793	0.267084	88.6667	+		2.68764	0.390589	92.3333	+
sp|O35286|DHX15_MOUSE	Dhx15	Pre-mRNA-splicing factor ATP-dependent RNA helicase DHX15 OS=Mus musculus GN=Dhx15 PE=1 SV=2	202.463	1	1	7.42	91007	46	5	5	6	6	29	29	15.1963	14.8383	13.9575	15.1167	16.2598	14.2109	15.666	16.3003	15.1792	14.863	14.3591	16.4822	13.5947	15.7467	15.1044	0.443663	0.438391	4	+		-0.793992	0.358975	0	+		0.832036	0.191029	2.5	+		-0.405619	0.61479	1.5	+
sp|Q8VHK9|DHX36_MOUSE	Dhx36	ATP-dependent RNA helicase DHX36 OS=Mus musculus GN=Dhx36 PE=1 SV=2	153.229	1	1	5.59	113883	56	5	5	5	5	15	15	11.1485	12.3083	12.5692	15.537	11.6284	10.8819	11.8096	12.4264	13.3353	12.7242	12.5519	16.0867	13.8354	12.145	13.8115	0.783789	0.551955	8	+		1.5774	0.0467319	0	+		-1.20415	0.268306	5	+		-0.410536	0.719164	3	+
sp|O70133|DHX9_MOUSE	Dhx9	ATP-dependent RNA helicase A OS=Mus musculus GN=Dhx9 PE=1 SV=2	1867.52	1	0	48.62	149475	76	58	58	64	64	712	712	16.1603	16.0954	16.2136	14.9398	20.2916	19.8382	21.1418	22.8472	16.4776	16.5499	16.2088	16.9201	19.5446	20.4378	21.3008	0.686852	0.0888004	20.8333	+		-0.601977	0.52978	115.167	+		5.17744	0.000394807	68.1667	+	+	3.88862	0.00037376	67.8333	+	+
sp|Q9Z207|DIAP3_MOUSE	Diaph3	Protein diaphanous homolog 3 OS=Mus musculus GN=Diaph3 PE=1 SV=1	275.092	1	0	12.21	133686	66	12	12	12	12	44	44	14.048	11.6718	10.4455	10.6507	10.7898	10.8819	14.4179	11.9882	16.2111	12.8908	9.23158	10.2362	12.7661	11.0634	13.3397	0.438452	0.812165	14.8333	+		0.370277	0.760767	16.6667	+		0.315465	0.798389	15.5	+		0.24729	0.903186	16	+
sp|Q8R418|DICER_MOUSE	Dicer1	Endoribonuclease Dicer OS=Mus musculus GN=Dicer1 PE=1 SV=3	18.978	1	0	0.52	216821	116	1	1	1	1	1	1	10.5982	9.99847	11.2371	10.6507	10.7898	10.8819	10.9778	11.9882	10.068	10.785	11.1691	10.2934	10.8596	11.0634	11.3406	-0.0422248	0.908888	2	+		-0.0715748	0.846031	0			0.53834	0.202815	1			0.50899	0.166918	1	+
sp|Q9ESX5|DKC1_MOUSE	Dkc1	H/ACA ribonucleoprotein complex subunit 4 OS=Mus musculus GN=Dkc1 PE=1 SV=4	1023.41	1	0	58.74	57402	35	23	23	26	26	384	384	14.1614	10.8667	12.7075	11.7053	22.2267	18.6962	20.169	19.7407	11.8016	12.7556	13.2888	16.3575	21.8616	20.072	19.4	1.19066	0.36429	28	+		0.236369	0.833944	74.1667	+		7.84793	0.000259219	58.8333	+	+	6.89364	0.00337388	43.3333	+	+
sp|Q8BMF4|ODP2_MOUSE	Dlat	Dihydrolipoyllysine-residue acetyltransferase component of pyruvate dehydrogenase complex, mitochondrial OS=Mus musculus GN=Dlat PE=1 SV=2	377.41	1	0	19.78	67942	36	10	10	11	11	49	49	11.8473	18.1649	17.6466	15.792	10.7898	18.6527	18.5417	13.8677	10.5376	18.3382	18.2762	16.3254	10.8596	18.63	13.4182	0.00666497	0.99781	7.5	+		-1.16038	0.711735	0	+		-0.399694	0.872772	3.5	+		-1.56674	0.611726	4	+
sp|O08749|DLDH_MOUSE	Dld	Dihydrolipoyl dehydrogenase, mitochondrial OS=Mus musculus GN=Dld PE=1 SV=2	372.965	1	0	31.83	54272	26	15	15	16	16	54	54	11.2514	17.2989	16.7355	12.8806	12.0747	14.6489	18.8314	11.8906	13.015	17.7933	16.4644	14.2606	11.2785	17.8633	11.4707	0.841721	0.660418	4.33333	+		-0.823902	0.767093	0	+		-0.180171	0.937024	2	+		-1.84579	0.442028	2.33333	+
sp|Q811D0|DLG1_MOUSE	Dlg1	Disks large homolog 1 OS=Mus musculus GN=Dlg1 PE=1 SV=1	20.536	1	0	1.33	100120	44	1	1	1	1	6	6	11.4647	11.2798	10.7218	10.6507	10.796	10.8819	10.9778	11.9882	10.1344	12.3608	10.9009	9.64808	11.0391	11.0634	11.3406	-0.268159	0.683269	2	+		-0.0133177	0.970183	0			0.131792	0.714755	1	+		0.386633	0.607245	1	+
sp|Q9D2G2|ODO2_MOUSE	Dlst	Dihydrolipoyllysine-residue succinyltransferase component of 2-oxoglutarate dehydrogenase complex, mitochondrial OS=Mus musculus GN=Dlst PE=1 SV=1	203.942	1	0	21.37	48995	26	8	8	9	9	27	27	11.6042	16.9371	10.4455	10.6507	15.3358	11.3535	10.9778	11.9882	12.9171	17.3132	12.9329	9.89877	12.7095	11.518	11.3406	0.856132	0.705707	7.5	+		-0.557814	0.669728	0	+		0.00447087	0.998126	4.5	+		-1.40948	0.478535	3	+
sp|P63037|DNJA1_MOUSE	Dnaja1	DnaJ homolog subfamily A member 1 OS=Mus musculus GN=Dnaja1 PE=1 SV=1	583.522	1	0	58.44	44868	24	15	15	20	20	118	118	14.1306	14.3612	16.3801	16.2734	14.7637	16.7891	16.276	15.244	17.7313	13.1667	15.9114	14.6338	10.8596	11.0634	13.7232	0.0745022	0.950067	53.5	+		-3.8861	0.00932756	1.5	+		0.481859	0.549865	19.5	+		-3.47875	0.0533564	35.5	+
sp|Q9QYJ0|DNJA2_MOUSE	Dnaja2	DnaJ homolog subfamily A member 2 OS=Mus musculus GN=Dnaja2 PE=1 SV=1	386.41	1	0	42.96	45746	25	12	12	14	14	68	68	17.7242	15.0777	16.1703	15.5623	16.0225	14.4717	14.8598	14.8951	18.374	15.6538	16.0094	15.0415	11.8128	14.3009	14.563	0.136068	0.888348	1.33333	+		-1.5034	0.130939	0	+		-1.07132	0.158491	0	+		-2.71079	0.0620904	1.33333	+
sp|Q99M87|DNJA3_MOUSE	Dnaja3	DnaJ homolog subfamily A member 3, mitochondrial OS=Mus musculus GN=Dnaja3 PE=1 SV=1	43.475	1	0	7.29	52443	26	2	2	2	2	4	4	10.5982	11.6982	10.4455	10.6507	10.7898	10.8819	10.9778	11.9882	9.13483	13.1407	10.5808	10.2934	10.8596	11.0634	11.3406	-0.0606905	0.947949	7			-0.0715748	0.846031	0			0.311323	0.46593	3			0.300439	0.777191	4
sp|Q9JMC3|DNJA4_MOUSE	Dnaja4	DnaJ homolog subfamily A member 4 OS=Mus musculus GN=Dnaja4 PE=1 SV=1	37.917	1	0	5.04	44902	26	2	2	2	2	2	2	10.5982	11.7238	12.0586	12.3174	11.058	10.8819	10.9778	11.9882	13.5212	11.0149	12.5327	11.8425	10.8596	11.0634	11.3406	0.553295	0.428904	17.5	+		-0.138627	0.687512	0			-0.448006	0.36521	6	+		-1.13993	0.134606	11.5	+
sp|Q9QYJ3|DNJB1_MOUSE	Dnajb1	DnaJ homolog subfamily B member 1 OS=Mus musculus GN=Dnajb1 PE=1 SV=3	448.965	1	0	44.71	38167	21	17	16	17	16	75	68	13.5775	12.6343	18.0636	13.0557	12.5324	12.8997	12.2158	11.9882	18.0902	11.1884	18.1891	11.657	11.9527	10.8802	14.9741	0.448391	0.852727	1	+		0.193304	0.861413	0	+		-1.92375	0.181771	0	+		-2.17883	0.426032	1	+
sp|Q9D832|DNJB4_MOUSE	Dnajb4	DnaJ homolog subfamily B member 4 OS=Mus musculus GN=Dnajb4 PE=1 SV=1	727.431	1	0	57.57	37782	19	19	18	21	20	153	146	13.9901	12.174	20.0877	12.1467	11.2121	10.8819	10.9778	11.9882	19.3037	13.4219	19.9086	13.8545	16.7547	11.0634	11.7224	2.02257	0.458586	23.6667	+		1.91516	0.266799	0	+		-3.3346	0.129146	10.6667	+		-3.442	0.2333	13	+
sp|O89114|DNJB5_MOUSE	Dnajb5	DnaJ homolog subfamily B member 5 OS=Mus musculus GN=Dnajb5 PE=2 SV=1	29.764	1	0	3.45	39119	20	1	1	1	1	1	1	10.5982	9.99847	10.4455	10.6507	10.7898	13.6161	13.4562	11.9882	12.5688	10.785	10.5808	10.2934	11.4681	13.8237	11.3406	0.633808	0.280796	5.5			-0.251777	0.818136	0	+		2.03939	0.0245028	3.5	+		1.1538	0.260115	2	+
sp|O54946|DNJB6_MOUSE	Dnajb6	DnaJ homolog subfamily B member 6 OS=Mus musculus GN=Dnajb6 PE=1 SV=4	296.437	1	2	29.86	39807	17	10	10	11	11	67	67	14.8398	11.336	16.8621	12.7206	14.0333	11.319	11.95	11.9882	17.1715	11.0761	16.2755	14.4746	12.929	11.7288	13.2096	0.809799	0.670541	5	+		0.29985	0.721627	0	+		-1.61698	0.27548	2	+		-2.12693	0.250814	3	+
sp|Q91YW3|DNJC3_MOUSE	Dnajc3	DnaJ homolog subfamily C member 3 OS=Mus musculus GN=Dnajc3 PE=1 SV=1	42.008	1	0	6.94	57464	32	2	2	2	2	5	5	10.5982	9.99847	13.5158	10.6507	10.7898	10.8819	11.4483	11.9882	13.9652	10.785	14.2762	11.3741	11.3272	11.6655	11.3406	1.40934	0.280398	4	+		0.167342	0.645247	0	+		0.0862839	0.921216	2.5			-1.15572	0.323336	1.5	+
sp|Q9QYI3|DNJC7_MOUSE	Dnajc7	DnaJ homolog subfamily C member 7 OS=Mus musculus GN=Dnajc7 PE=1 SV=2	1183.34	1	0	57.69	56476	36	32	32	42	42	283	283	15.8352	14.301	19.9646	12.2482	16.6623	13.8188	12.7914	13.1261	19.9138	14.6408	19.5019	14.5562	16.8875	11.8916	12.905	1.56593	0.503815	92.8333	+		-0.204922	0.905836	116.333	+		-1.4876	0.453376	135.5	+		-3.25845	0.192493	73.6667	+
sp|Q91WN1|DNJC9_MOUSE	Dnajc9	DnaJ homolog subfamily C member 9 OS=Mus musculus GN=Dnajc9 PE=1 SV=2	20.989	1	0	4.25	30059	18	1	1	1	1	1	1	10.5982	10.6371	10.4455	10.6507	10.7898	10.8819	10.9778	11.9882	12.2843	10.785	10.5808	12.6264	10.8596	11.0634	11.3406	0.986277	0.106777	2	+		-0.0715748	0.846031	0			0.576603	0.0876332	1			-0.481249	0.475414	1	+
sp|Q8K1M6|DNM1L_MOUSE	Dnm1l	Dynamin-1-like protein OS=Mus musculus GN=Dnm1l PE=1 SV=2	227.934	1	0	11.86	82658	54	7	7	7	7	14	14	15.444	13.2827	10.4455	10.6507	10.7898	10.8819	10.9778	11.9882	14.9011	12.8267	10.5808	10.2934	11.5477	11.0634	11.3406	-0.305223	0.8553	42	+		0.157779	0.671244	3			-1.29627	0.32871	21.5	+		-0.833267	0.543919	23.5	+
sp|P39054|DYN2_MOUSE	Dnm2	Dynamin-2 OS=Mus musculus GN=Dnm2 PE=1 SV=2	478.593	1	1	28.51	98145	59	19	15	20	16	81	61	18.3031	15.2641	12.7138	10.6507	12.6713	14.393	10.9778	12.8862	18.0487	13.1863	12.3644	12.3248	13.7205	15.7938	12.4434	-0.251861	0.910434	158.5	+		1.2538	0.33002	0	+		-1.50084	0.434938	95.3333	+		0.0048295	0.99798	63.1667	+
sp|Q8BZ98|DYN3_MOUSE	Dnm3	Dynamin-3 OS=Mus musculus GN=Dnm3 PE=1 SV=1	107.075	1	0	7.65	97190	61	6	2	6	2	31	11	10.5982	12.8814	10.4455	10.6507	10.7898	11.8987	10.9778	11.9882	15.7183	10.785	10.5808	10.2934	10.8596	11.0634	11.3406	0.700457	0.639233	3			-0.325766	0.434476	0			0.269702	0.696039	3			-0.756521	0.643418	0
sp|P13864|DNMT1_MOUSE	Dnmt1	DNA (cytosine-5)-methyltransferase 1 OS=Mus musculus GN=Dnmt1 PE=1 SV=5	104.868	1	0	5.31	183189	97	7	7	7	7	13	13	13.0483	13.4813	13.7917	13.6093	12.7483	12.2165	12.442	12.8242	14.9075	12.0775	13.7794	13.8939	11.8467	14.3101	11.2644	0.181921	0.774715	68.5	+		-0.084023	0.920288	3.5	+		-0.924871	0.00471641	33.5	+		-1.19081	0.306048	38.5	+
sp|O88508|DNM3A_MOUSE	Dnmt3a	DNA (cytosine-5)-methyltransferase 3A OS=Mus musculus GN=Dnmt3a PE=1 SV=2	146.784	1	0	5.84	101672	60	4	4	4	4	26	26	10.5982	9.99847	10.4455	10.6507	14.2842	10.8819	10.9778	12.2788	9.13483	10.785	10.5808	10.2934	14.0991	11.8816	11.3406	-0.224678	0.592191	355.5			0.334731	0.787026	215	+		1.6825	0.0820833	346.333	+		2.24191	0.0427119	224.167	+	+
sp|Q8C3J5|DOCK2_MOUSE	Dock2	Dedicator of cytokinesis protein 2 OS=Mus musculus GN=Dock2 PE=1 SV=3	16.013	1	0	0.38	211704	106	1	1	1	1	1	1	10.5982	9.99847	10.4455	10.6507	10.7898	10.8819	10.9778	11.9882	9.13483	12.2574	10.5808	10.2934	10.8596	11.0634	11.3406	0.143433	0.835464	2.5			-0.0715748	0.846031	0			0.736253	0.0585291	0			0.521245	0.529198	2.5
sp|Q8R1A4|DOCK7_MOUSE	Dock7	Dedicator of cytokinesis protein 7 OS=Mus musculus GN=Dock7 PE=1 SV=3	16.522	1	0	0.75	241438	122	1	1	1	1	1	1	10.5982	19.8989	20.5232	21.2845	12.0817	20.989	21.5535	19.9504	21.5275	13.8131	20.8417	21.578	10.8596	18.5585	25.4342	1.36386	0.678922	2	+		-0.359526	0.937881	0	+		0.567436	0.870866	2	+		-1.15595	0.792602	0	+
sp|A6X919|D19L1_MOUSE	Dpy19l1	Probable C-mannosyltransferase DPY19L1 OS=Mus musculus GN=Dpy19l1 PE=1 SV=1	7.262	1	0	1.88	84187	34	1	1	1	1	1	1	10.5982	11.9598	10.4455	10.6507	10.7898	10.8819	10.9778	11.9882	9.13483	13.1573	10.5808	10.2934	10.8596	11.0634	11.3406	-0.121916	0.898707	11.3333			-0.0715748	0.846031	0			0.245927	0.603392	7			0.296269	0.781136	4.33333
sp|Q99LT0|DPY30_MOUSE	Dpy30	Protein dpy-30 homolog OS=Mus musculus GN=Dpy30 PE=1 SV=1	55.751	1	0	36.36	11213	6	2	2	2	2	7	7	10.5982	9.99847	11.139	10.6507	10.7898	10.8819	10.9778	11.9882	9.13483	10.785	10.5808	10.2934	10.8596	11.0634	11.3406	-0.398071	0.396859	5.5			-0.0715748	0.846031	0			0.562861	0.172809	2.5			0.889357	0.105937	3
sp|O08553|DPYL2_MOUSE	Dpysl2	Dihydropyrimidinase-related protein 2 OS=Mus musculus GN=Dpysl2 PE=1 SV=2	154.767	1	0	10.31	62278	34	5	5	5	5	18	18	12.8492	13.3334	12.1603	16.5604	10.7898	10.8819	10.9778	11.9882	13.7576	11.8311	12.454	15.8646	10.8596	11.0634	11.3406	-0.248964	0.856732	16.6667	+		-0.0715748	0.846031	6			-2.56636	0.0446435	10.3333	+	+	-2.38897	0.0741519	12.3333	+
sp|P32233|DRG1_MOUSE	Drg1	Developmentally-regulated GTP-binding protein 1 OS=Mus musculus GN=Drg1 PE=1 SV=1	29.36	1	0	6.54	40512	25	2	2	2	2	5	5	17.7228	15.9996	17.379	17.2102	17.1549	18.2328	18.4184	16.7678	13.7638	15.8996	16.5133	16.7265	18.3012	18.8454	17.623	-1.35209	0.131237	1	+		0.613053	0.324795	0	+		0.56558	0.344075	0	+		2.53072	0.031398	1	+
sp|Q61495|DSG1A_MOUSE	Dsg1a	Desmoglein-1-alpha OS=Mus musculus GN=Dsg1a PE=2 SV=2	45.545	2	0	1.51	114597	45	2	2	2	2	13	13	11.9986	11.1388	12.2946	13.0457	10.7898	13.89	14.3119	13.167	9.13483	12.3231	14.6412	11.7245	14.1422	14.7814	13.0022	-0.163541	0.895882	1	+		0.935552	0.404187	0	+		0.920251	0.335772	0	+		2.01934	0.210858	1	+
sp|E9Q557|DESP_MOUSE	Dsp	Desmoplakin OS=Mus musculus GN=Dsp PE=1 SV=1	980.802	1	0	16.55	332912	206	42	42	44	44	259	259	16.588	17.9136	17.1803	16.665	16.2105	18.1041	18.536	16.6375	14.7774	18.4352	18.2738	17.4559	17.9381	18.0103	16.2954	0.148852	0.874116	37	+		0.0425518	0.960269	0	+		0.285314	0.670855	15	+		0.179014	0.877786	22	+
sp|Q9R0P5|DEST_MOUSE	Dstn	Destrin OS=Mus musculus GN=Dstn PE=1 SV=3	138.923	1	0	35.76	18522	13	5	5	5	5	21	21	11.6977	10.6621	12.8684	14.2812	10.7898	13.4069	11.7542	11.9882	14.7246	12.7302	12.9263	14.8973	10.8596	11.0634	11.3406	1.44222	0.186675	11.3333	+		-0.896895	0.226071	0	+		-0.39257	0.693044	5.16667	+		-2.73169	0.0107585	6.16667	+	+
sp|Q60838|DVL2_MOUSE	Dvl2	Segment polarity protein dishevelled homolog DVL-2 OS=Mus musculus GN=Dvl2 PE=1 SV=2	40.051	1	0	2.17	78861	32	1	1	1	1	13	13	10.5552	9.99847	10.4455	10.6507	10.7898	10.8819	10.9778	11.9882	9.10286	10.785	10.5808	10.2934	10.8596	11.0634	11.3406	-0.221914	0.601753	3.5			-0.0715748	0.846031	0			0.74701	0.0548368	1.5			0.897349	0.108726	2
sp|Q8CHY3|DYM_MOUSE	Dym	Dymeclin OS=Mus musculus GN=Dym PE=1 SV=1	43.366	1	0	4.48	75848	29	3	3	3	3	8	8	13.4885	9.99847	12.453	10.6507	11.1173	10.8819	10.9778	11.9882	13.7184	10.785	12.4272	10.2934	10.9015	11.0634	11.3406	0.158356	0.892444	6.5	+		-0.139497	0.679838	0			-0.406337	0.646781	5	+		-0.70419	0.484704	1.5	+
sp|O88487|DC1I2_MOUSE	Dync1i2	Cytoplasmic dynein 1 intermediate chain 2 OS=Mus musculus GN=Dync1i2 PE=1 SV=1	72.597	1	0	5.72	68394	23	2	2	2	2	9	9	13.6237	13.1669	10.4455	12.4957	10.7898	10.8819	10.9778	11.9882	12.178	11.7118	11.8449	13.2798	11.7442	11.0634	11.3406	-0.179302	0.827316	10.6667	+		0.223284	0.571653	0			-1.27349	0.14272	6.33333	+		-0.870899	0.112159	4.33333	+
sp|Q8R1Q8|DC1L1_MOUSE	Dync1li1	Cytoplasmic dynein 1 light intermediate chain 1 OS=Mus musculus GN=Dync1li1 PE=1 SV=1	33.993	1	0	4.97	56614	33	2	2	2	2	5	5	13.6816	9.82185	10.4455	10.6507	10.7898	10.8819	10.9778	11.9882	12.2422	10.9162	10.5808	10.2934	10.8596	11.0634	11.3406	-0.141706	0.887907	5	+		-0.0715748	0.846031	0			0.00956758	0.991917	4	+		0.079699	0.884761	1	+
sp|Q6PDL0|DC1L2_MOUSE	Dync1li2	Cytoplasmic dynein 1 light intermediate chain 2 OS=Mus musculus GN=Dync1li2 PE=1 SV=2	158.602	1	0	9.96	54218	31	4	4	5	5	44	44	15.3287	10.2678	10.6639	10.6507	10.7898	10.8819	10.9778	11.9882	12.6316	11.0864	10.5808	10.2425	10.8596	11.0634	11.3406	-0.592464	0.668034	13	+		-0.0715748	0.846031	0			-0.568333	0.661765	7	+		-0.0474446	0.943389	6	+
sp|P63168|DYL1_MOUSE	Dynll1	Dynein light chain 1, cytoplasmic OS=Mus musculus GN=Dynll1 PE=1 SV=1	65.699	1	1	37.08	10366	5	2	2	2	2	4	4	10.5982	12.8021	13.7499	10.6507	10.7898	10.8819	10.9778	11.9882	9.13483	10.785	10.5808	10.2934	10.8596	11.3459	11.3406	-1.75171	0.0911252	0	+		0.022611	0.951887	1			-0.790778	0.381462	1	+		0.983542	0.0837804	0
sp|Q58FA4|E2F8_MOUSE	E2f8	Transcription factor E2F8 OS=Mus musculus GN=E2f8 PE=1 SV=1	91.748	1	0	8.72	93276	41	5	5	5	5	15	15	11.8895	11.2242	10.7086	10.6507	10.7898	10.8819	10.9778	11.9882	13.1065	10.785	11.2648	10.2863	10.8596	11.0634	11.3406	0.242417	0.733365	36.5	+		-0.0715748	0.846031	0			0.041213	0.921416	17.5	+		-0.272778	0.726559	19	+
sp|P70245|EBP_MOUSE	Ebp	3-beta-hydroxysteroid-Delta(8),Delta(7)-isomerase OS=Mus musculus GN=Ebp PE=1 SV=3	26.219	1	0	5.22	26215	3	1	1	1	1	4	4	10.5982	12.9617	10.9222	11.7627	10.7898	11.5319	11.9956	12.2601	9.13483	12.3198	10.5808	10.2934	10.8596	12.4436	11.3406	-0.97895	0.289829	1.5	+		-0.0963939	0.867026	0	+		0.0831628	0.897354	0	+		0.965719	0.318465	1.5
sp|Q9CS74|ECD_MOUSE	Ecd	Protein ecdysoneless homolog OS=Mus musculus GN=Ecd PE=1 SV=2	164.453	1	0	10.61	71710	33	4	4	4	4	19	19	12.4925	9.99847	10.4455	10.6507	10.7898	10.8819	10.9778	11.9882	13.669	10.785	10.5808	10.2934	10.8596	11.0634	11.3406	0.435281	0.665655	80.1667			-0.0715748	0.846031	0			0.262669	0.684607	39.8333			-0.244187	0.804724	40.3333
sp|Q8BH95|ECHM_MOUSE	Echs1	Enoyl-CoA hydratase, mitochondrial OS=Mus musculus GN=Echs1 PE=1 SV=1	76.377	1	0	12.41	31474	18	4	4	4	4	10	10	10.5982	15.1955	10.8746	10.6507	12.861	13.8256	10.7937	12.2543	10.3096	16.1523	10.3237	14.2828	11.9789	10.9762	11.3005	0.937372	0.629812	40.5	+		-1.01509	0.255739	4.33333	+		0.603923	0.656354	10.8333	+		-1.34854	0.476081	34	+
sp|P42125|ECI1_MOUSE	Eci1	Enoyl-CoA delta isomerase 1, mitochondrial OS=Mus musculus GN=Eci1 PE=1 SV=2	156.301	1	0	23.18	32250	18	5	5	5	5	22	22	10.5982	15.4546	10.4455	10.6507	10.7898	10.8819	10.9778	11.9882	10.301	14.6777	11.3592	10.2934	10.9626	11.0634	11.3406	-0.129364	0.938335	1	+		-0.0372517	0.917808	0			-0.62777	0.634636	0			-0.535658	0.681593	1	+
sp|Q8K2D3|EDC3_MOUSE	Edc3	Enhancer of mRNA-decapping protein 3 OS=Mus musculus GN=Edc3 PE=1 SV=1	21.776	1	0	1.97	55957	31	1	1	1	1	1	1	11.7071	10.6434	10.4455	10.6507	10.7898	10.8819	10.9778	11.9882	9.74836	10.7323	10.5808	10.2934	10.8596	11.0634	11.3406	-0.522926	0.195175	12	+		-0.0715748	0.846031	1			0.297797	0.484002	5.5	+		0.749147	0.0449652	7.5	+
sp|Q3UJB9|EDC4_MOUSE	Edc4	Enhancer of mRNA-decapping protein 4 OS=Mus musculus GN=Edc4 PE=1 SV=2	242.198	1	0	7.33	152484	68	8	8	9	9	60	60	17.3125	12.9796	12.0668	16.603	13.3674	10.547	10.9778	13.0169	16.116	11.9601	13.3541	16.1676	12.9676	12.3482	15.3134	-0.340973	0.844928	10	+		1.56577	0.22459	11	+		-2.76318	0.111725	10.5	+		-0.856432	0.580318	10.5	+
sp|Q8BL66|EEA1_MOUSE	Eea1	Early endosome antigen 1 OS=Mus musculus GN=Eea1 PE=1 SV=2	1440.7	1	0	43.59	160915	112	50	50	51	51	154	154	14.2903	19.1639	15.0401	15.9849	13.9739	16.451	15.1412	15.0429	14.5745	19.6488	14.4965	14.1651	15.6723	15.4568	17.0348	-0.398567	0.821877	42	+		0.902442	0.270536	32	+		-0.967594	0.445837	41.5	+		0.333415	0.843793	32.5	+
sp|P10126|EF1A1_MOUSE	Eef1a1	Elongation factor 1-alpha 1 OS=Mus musculus GN=Eef1a1 PE=1 SV=3	988.796	1	0	69.05	50114	25	24	14	34	23	791	425	22.888	17.9276	18.0403	18.3536	15.5412	16.2778	16.6312	16.0986	20.9736	18.2413	17.9311	19.08	14.9882	15.7161	17.355	-0.2459	0.864421	13.5	+		-0.117414	0.862585	0	+		-3.16519	0.0409668	4.5	+	+	-3.0367	0.0287103	9	+	+
sp|P62631|EF1A2_MOUSE	Eef1a2	Elongation factor 1-alpha 2 OS=Mus musculus GN=Eef1a2 PE=1 SV=1	496.347	1	0	30.02	50454	25	12	2	14	3	402	36	13.1868	14.0096	13.7833	11.8138	10.7898	12.4409	10.9778	11.9882	13.7259	12.7113	13.172	13.5051	10.8596	11.0634	11.3406	0.0802161	0.886825	81	+		-0.461314	0.38425	0			-1.64917	0.0403762	39.5	+	+	-2.1907	0.000604086	41.5	+	+
sp|O70251|EF1B_MOUSE	Eef1b	Elongation factor 1-beta OS=Mus musculus GN=Eef1b PE=1 SV=5	20.348	1	0	5.78	24694	15	1	1	1	1	2	2	10.5982	11.4664	11.2564	10.6507	10.7898	11.2199	10.9778	11.9882	9.13483	10.952	11.9789	10.2934	10.8596	11.1762	11.3406	-0.403154	0.548667	4	+		-0.118469	0.736614	0			0.251004	0.489864	0	+		0.535689	0.487602	4	+
sp|P57776|EF1D_MOUSE	Eef1d	Elongation factor 1-delta OS=Mus musculus GN=Eef1d PE=1 SV=3	309.751	1	0	39.86	31293	21	7	7	8	8	72	72	11.2221	18.0587	16.3535	13.771	10.7898	11.8151	10.9778	11.9882	15.1317	16.3259	16.2433	14.6451	10.8596	11.8789	11.3406	0.7352	0.652719	5.5	+		-0.0330488	0.941786	0			-3.45858	0.0640032	2	+		-4.22683	0.00059378	3.5	+
sp|P58252|EF2_MOUSE	Eef2	Elongation factor 2 OS=Mus musculus GN=Eef2 PE=1 SV=2	573.697	1	0	32.4	95314	53	21	20	22	21	149	145	18.1425	15.5485	15.9983	18.2411	15.2923	16.0032	15.3879	16.4346	16.2042	16.0452	16.9874	18.0797	14.7702	15.8954	16.4634	-0.153467	0.861706	9	+		-0.069821	0.899232	10	+		-1.20312	0.161737	9.33333	+		-1.11948	0.165573	9.66667	+
sp|Q9D8Y0|EFHD2_MOUSE	Efhd2	EF-hand domain-containing protein D2 OS=Mus musculus GN=Efhd2 PE=1 SV=1	64.901	1	0	15.83	26791	16	3	3	3	3	9	9	11.031	14.2133	10.2158	10.6507	10.7898	10.7018	10.9778	11.9882	9.94378	15.4947	10.6938	11.5908	10.8596	11.6889	11.3406	0.403074	0.801549	2	+		0.181965	0.671873	0	+		-0.413267	0.681175	2	+		-0.634377	0.684992	0	+
sp|O08810|U5S1_MOUSE	Eftud2	116 kDa U5 small nuclear ribonucleoprotein component OS=Mus musculus GN=Eftud2 PE=1 SV=1	190.941	1	0	10.5	109361	54	8	7	8	7	23	19	11.4423	12.7803	10.4344	11.6648	10.7898	16.1698	16.04	15.5968	12.1695	11.5859	11.6243	12.4394	14.8848	15.9786	14.4964	0.374361	0.502465	7.5	+		0.470855	0.776789	0	+		3.06867	0.0676992	4	+		3.16516	0.000863657	3.5	+
sp|Q69ZW3|EHBP1_MOUSE	Ehbp1	EH domain-binding protein 1 OS=Mus musculus GN=Ehbp1 PE=1 SV=3	836.982	1	0	27.78	139104	76	27	27	29	29	159	159	16.261	12.8925	18.8933	11.5667	17.8836	12.9183	13.2591	11.9882	17.5143	15.3849	18.5471	13.081	13.8609	13.125	17.379	1.22843	0.57138	44.8333	+		0.776025	0.700957	0	+		-0.891073	0.6885	23.8333	+		-1.34348	0.490336	21	+
sp|Q9WVK4|EHD1_MOUSE	Ehd1	EH domain-containing protein 1 OS=Mus musculus GN=Ehd1 PE=1 SV=1	272.66	1	0	29.78	60603	33	14	8	15	8	55	28	15.2652	12.4777	10.4455	10.6507	10.7898	10.8819	11.1303	11.9882	16.0387	13.0722	11.7223	11.1906	10.8596	11.0634	15.9631	0.796164	0.62741	4.33333	+		1.43114	0.363692	3.33333			-1.01219	0.412308	3	+		-0.377213	0.850212	4.66667	+
sp|Q9QXY6|EHD3_MOUSE	Ehd3	EH domain-containing protein 3 OS=Mus musculus GN=Ehd3 PE=1 SV=2	165.379	1	0	16.45	60821	32	9	1	11	1	47	7	16.7151	12.1599	10.808	10.6507	10.7898	10.8819	10.9778	11.9882	16.6262	13.2399	10.5808	10.2934	10.8596	11.0634	11.3406	0.101671	0.961939	42	+		-0.0715748	0.846031	0			-1.42396	0.362592	18.5	+		-1.59721	0.402053	23.5	+
sp|Q9EQP2|EHD4_MOUSE	Ehd4	EH domain-containing protein 4 OS=Mus musculus GN=Ehd4 PE=1 SV=1	1144.68	1	1	60.81	61481	32	28	23	36	29	277	249	20.1113	16.0797	14.798	16.4082	12.4822	12.5529	15.3545	11.9882	20.5398	16.4144	13.9307	15.8205	11.539	14.0822	17.9139	-0.172963	0.926598	8	+		1.41724	0.465408	5.66667	+		-3.75486	0.0340079	9.33333	+	+	-2.16466	0.382559	4.33333	+
sp|Q8BJW6|EIF2A_MOUSE	Eif2a	Eukaryotic translation initiation factor 2A OS=Mus musculus GN=Eif2a PE=1 SV=2	389.706	1	0	30.12	64403	37	12	12	12	12	65	65	13.1898	13.399	14.9322	18.1085	13.7578	14.4679	15.4978	12.3993	13.1625	14.9409	15.7869	18.2542	13.7472	15.8953	12.6581	0.628721	0.699488	24	+		0.0694986	0.952379	0	+		-0.876691	0.527853	10	+		-1.43591	0.377564	14	+
sp|Q99LC8|EI2BA_MOUSE	Eif2b1	Translation initiation factor eIF-2B subunit alpha OS=Mus musculus GN=Eif2b1 PE=1 SV=1	36.498	1	0	3.61	33816	17	1	1	1	1	3	3	11.7489	10.2463	10.4455	10.6507	10.7898	10.8819	10.9778	11.9882	8.74	10.785	10.5808	10.2934	10.8596	11.0634	11.3406	-0.673004	0.284653	0			-0.0715748	0.846031	1			0.386636	0.409748	1			0.988065	0.13887	0
sp|Q6ZWX6|IF2A_MOUSE	Eif2s1	Eukaryotic translation initiation factor 2 subunit 1 OS=Mus musculus GN=Eif2s1 PE=1 SV=3	1063.37	1	0	65.71	36108	22	19	19	27	27	144	144	16.255	16.5086	16.8403	19.5384	18.3332	14.9851	16.1663	11.9882	16.2612	16.5121	16.392	19.977	15.8955	15.7178	13.4112	-1.32004e-05	0.999991	1	+		-0.360074	0.840839	20.6667	+		-1.91738	0.255607	9.66667	+		-2.27744	0.129634	12	+
sp|Q99L45|IF2B_MOUSE	Eif2s2	Eukaryotic translation initiation factor 2 subunit 2 OS=Mus musculus GN=Eif2s2 PE=1 SV=1	136.213	1	0	19.34	38092	22	6	6	6	6	27	27	16.4499	14.9015	15.2267	16.0153	14.7879	14.7336	14.1414	11.9882	15.7308	15.2224	15.1701	16.5765	15.7259	14.2196	11.6979	0.0266264	0.957742	25.3333	+		-0.0316237	0.980857	1.66667	+		-1.73558	0.059344	12.5	+		-1.79383	0.150155	14.5	+
sp|Q9Z0N1|IF2G_MOUSE	Eif2s3x	Eukaryotic translation initiation factor 2 subunit 3, X-linked OS=Mus musculus GN=Eif2s3x PE=1 SV=2	504.714	1	1	46.61	51065	25	16	16	16	16	94	94	13.9577	15.0849	15.5507	18.5318	10.022	13.2492	13.0307	12.717	16.1015	14.5307	14.8562	19.35	12.4251	13.9517	14.6675	0.428316	0.780669	42.1667	+		1.42666	0.231539	0	+		-3.52655	0.0287232	19.5	+	+	-2.5282	0.133904	22.6667	+
sp|P23116|EIF3A_MOUSE	Eif3a	Eukaryotic translation initiation factor 3 subunit A OS=Mus musculus GN=Eif3a PE=1 SV=5	471.242	1	0	20.76	161936	88	29	29	30	30	110	110	17.2521	16.5329	17.5252	19.5611	18.7542	15.3017	15.1398	14.3428	16.9885	16.2042	17.3439	18.8274	16.518	15.6394	14.4508	-0.376848	0.673257	17.1667	+		-0.348567	0.793505	0	+		-1.83318	0.169684	2.5	+		-1.8049	0.0792794	14.6667	+
sp|Q8JZQ9|EIF3B_MOUSE	Eif3b	Eukaryotic translation initiation factor 3 subunit B OS=Mus musculus GN=Eif3b PE=1 SV=1	208.383	1	0	15.19	91370	40	8	8	8	8	61	61	14.5014	12.7549	14.3512	17.3474	10.9582	11.1241	10.9778	11.9882	14.7071	12.2273	14.9607	16.5646	12.5492	11.0634	11.3406	-0.123809	0.927753	25.3333	+		0.388986	0.453794	11.1667	+		-3.47666	0.0124278	19.3333	+	+	-2.96387	0.0464838	17.1667	+	+
sp|Q8R1B4|EIF3C_MOUSE	Eif3c	Eukaryotic translation initiation factor 3 subunit C OS=Mus musculus GN=Eif3c PE=1 SV=1	192.482	1	0	11.2	105531	45	9	9	9	9	37	37	11.491	12.349	14.2899	17.2718	12.8825	10.8819	10.9778	11.9882	13.4508	12.8725	15.4125	16.0246	11.6783	11.165	11.3406	0.589678	0.705823	20	+		-0.287994	0.636175	1	+		-2.16781	0.163611	12	+		-3.04548	0.020038	9	+	+
sp|O70194|EIF3D_MOUSE	Eif3d	Eukaryotic translation initiation factor 3 subunit D OS=Mus musculus GN=Eif3d PE=1 SV=2	198.984	1	0	12.77	63989	27	5	5	5	5	15	15	10.5982	12.632	15.4825	16.6325	10.7898	10.8819	10.9778	11.9882	13.5647	11.0734	16.0851	15.6347	10.8596	11.0634	11.3406	0.253197	0.891804	1	+		-0.0715748	0.846031	0			-2.67683	0.103695	1	+		-3.0016	0.078428	0	+
sp|P60229|EIF3E_MOUSE	Eif3e	Eukaryotic translation initiation factor 3 subunit E OS=Mus musculus GN=Eif3e PE=1 SV=1	110.681	1	0	20.22	52221	32	7	7	7	7	28	28	13.6667	12.5225	13.8512	16.1847	10.7898	11.1292	11.2526	11.9882	14.1217	12.6978	15.7988	14.9635	10.9753	11.1773	11.3406	0.339162	0.749276	3.5	+		-0.125549	0.70361	0	+		-2.76634	0.0141062	2	+		-3.23105	0.00933011	1.5	+
sp|Q9DCH4|EIF3F_MOUSE	Eif3f	Eukaryotic translation initiation factor 3 subunit F OS=Mus musculus GN=Eif3f PE=1 SV=2	134.026	1	0	13.85	37984	16	4	4	4	4	19	19	10.8947	9.99847	11.1913	15.5695	10.7898	10.8819	10.9778	11.9882	11.9451	10.785	12.0364	14.509	10.8596	11.0634	11.3406	0.405395	0.792092	50.5	+		-0.0715748	0.846031	32.5			-0.754027	0.576026	35.3333	+		-1.231	0.244888	47.6667	+
sp|Q9Z1D1|EIF3G_MOUSE	Eif3g	Eukaryotic translation initiation factor 3 subunit G OS=Mus musculus GN=Eif3g PE=1 SV=2	18.181	1	0	4.06	35638	22	1	1	1	1	1	1	10.5982	11.3574	11.0825	12.1282	10.7898	10.8819	12.4927	11.9882	10.9595	11.1729	12.4622	11.2262	10.8596	11.0634	11.3406	0.163618	0.73821	1	+		-0.450291	0.416873	1.5			0.246599	0.65637	0	+		-0.367311	0.421313	2.5	+
sp|Q91WK2|EIF3H_MOUSE	Eif3h	Eukaryotic translation initiation factor 3 subunit H OS=Mus musculus GN=Eif3h PE=1 SV=1	145.315	1	0	26.42	39832	24	7	7	7	7	37	37	15.0196	13.6506	14.6968	16.0902	12.6346	10.8819	10.9778	11.9882	13.8726	13.5749	14.7929	15.5913	10.8596	11.0634	11.3406	-0.406373	0.571899	0	+		-0.53276	0.344946	5			-3.24366	0.00257477	5	+	+	-3.37005	0.00174305	0	+
sp|Q9QZD9|EIF3I_MOUSE	Eif3i	Eukaryotic translation initiation factor 3 subunit I OS=Mus musculus GN=Eif3i PE=1 SV=1	212.11	1	0	37.54	36461	22	7	7	7	7	59	59	14.9365	11.7703	12.8432	17.3971	10.7898	10.8462	12.0885	11.9882	12.8863	12.0916	13.9669	17.3861	10.8596	11.0634	11.3406	-0.154055	0.930887	29.5	+		-0.340308	0.46819	44.5	+		-2.80859	0.0725011	33	+		-2.99484	0.0829156	41	+
sp|Q9DBZ5|EIF3K_MOUSE	Eif3k	Eukaryotic translation initiation factor 3 subunit K OS=Mus musculus GN=Eif3k PE=1 SV=1	60.636	1	0	12.84	25087	11	2	2	2	2	3	3	10.5982	9.99847	10.4455	14.3212	10.7898	10.8819	10.9778	11.9882	12.2581	10.785	13.0337	11.3963	10.8596	11.0634	11.3406	0.527418	0.653188	0	+		-0.0715748	0.846031	6			-0.181383	0.867242	3.5			-0.780375	0.245883	2.5	+
sp|Q8QZY1|EIF3L_MOUSE	Eif3l	Eukaryotic translation initiation factor 3 subunit L OS=Mus musculus GN=Eif3l PE=1 SV=1	344.784	1	0	21.28	66613	32	9	9	9	9	49	49	14.5179	13.2649	14.7116	17.442	11.092	11.2145	10.9778	11.9882	13.7287	13.5825	15.1743	16.4713	10.8596	11.4183	11.3406	-0.24493	0.832965	12.1667	+		-0.111962	0.730568	3	+		-3.66597	0.00685713	4	+		-3.533	0.00756765	11.1667	+	+
sp|Q99JX4|EIF3M_MOUSE	Eif3m	Eukaryotic translation initiation factor 3 subunit M OS=Mus musculus GN=Eif3m PE=1 SV=1	42.941	1	0	7.22	42517	22	1	1	1	1	3	3	10.5982	9.99847	10.4455	13.2117	10.7898	10.8819	10.9778	11.9882	9.13483	10.785	10.5808	10.2934	10.8596	11.0634	11.3406	-0.864924	0.329612	10.8333			-0.0715748	0.846031	0			0.0960074	0.90593	4.33333			0.889357	0.105937	6.5
sp|P60843|IF4A1_MOUSE	Eif4a1	Eukaryotic initiation factor 4A-I OS=Mus musculus GN=Eif4a1 PE=1 SV=1	762.837	1	0	69.21	46154	24	22	13	29	19	199	90	14.4127	14.4191	18.4	15.1037	16.3044	11.4346	12.6629	13.5724	17.0044	14.5545	17.6807	15.8649	11.2541	12.4586	16.0889	0.692236	0.576791	97.5	+		-0.226426	0.900685	11.5	+		-2.0903	0.187675	53.5	+		-3.00896	0.0945498	55.5	+
sp|Q91VC3|IF4A3_MOUSE	Eif4a3	Eukaryotic initiation factor 4A-III OS=Mus musculus GN=Eif4a3 PE=1 SV=3	188.224	1	0	17.52	46840	26	7	4	7	4	55	24	10.6646	13.3767	12.9778	10.6507	10.7898	13.5179	13.9685	13.2721	12.8728	13.1135	13.0278	10.2934	13.9849	14.7718	12.0192	0.409415	0.696107	18.1667	+		0.704876	0.545408	0	+		0.969614	0.379534	4.5	+		1.26508	0.284708	13.6667	+
sp|Q8BGD9|IF4B_MOUSE	Eif4b	Eukaryotic translation initiation factor 4B OS=Mus musculus GN=Eif4b PE=1 SV=1	180.896	1	0	16.53	68840	35	7	7	7	7	29	29	13.5762	14.0392	15.1713	17.4564	11.0266	10.8819	10.9778	12.3632	14.1193	13.7902	15.3424	16.3616	10.8596	10.6167	11.625	-0.157417	0.885491	4	+		-0.27862	0.592376	0	+		-3.74839	0.00703356	2	+		-3.86959	0.00343655	2	+
sp|P63073|IF4E_MOUSE	Eif4e	Eukaryotic translation initiation factor 4E OS=Mus musculus GN=Eif4e PE=1 SV=1	99.605	1	0	14.75	25053	14	3	3	3	3	14	14	10.4128	10.1198	11.3	16.32	10.7898	10.8819	10.9778	11.9882	12.9224	10.785	13.0986	16.8517	10.8596	11.0634	11.3406	1.37628	0.500592	3.5	+		-0.0715748	0.846031	0			-0.8787	0.573319	1	+		-2.32655	0.180665	2.5	+
sp|Q8BMB3|IF4E2_MOUSE	Eif4e2	Eukaryotic translation initiation factor 4E type 2 OS=Mus musculus GN=Eif4e2 PE=1 SV=1	131.238	1	0	22.04	28263	14	5	5	5	5	34	34	15.569	14.5759	17.1694	10.6507	10.7898	10.8819	10.9778	13.4697	16.3636	14.2731	16.7035	11.7676	10.8596	11.0634	11.3406	0.285667	0.878723	134.5	+		-0.441937	0.593301	10.8333			-2.96145	0.101231	47.1667	+		-3.68905	0.0412966	98.1667	+	+
sp|Q9EST3|4ET_MOUSE	Eif4enif1	Eukaryotic translation initiation factor 4E transporter OS=Mus musculus GN=Eif4enif1 PE=1 SV=2	143.794	1	0	10.17	107986	44	7	7	7	7	31	31	14.3943	11.8897	14.2169	10.9307	12.2096	12.4759	11.4156	12.9379	15.7453	13.2383	13.0591	10.542	12.2524	12.9292	11.526	0.288262	0.839925	59.3333	+		-0.0238429	0.964338	0	+		-0.598145	0.538197	23	+		-0.91025	0.515764	36.3333	+
sp|Q6NZJ6|IF4G1_MOUSE	Eif4g1	Eukaryotic translation initiation factor 4 gamma 1 OS=Mus musculus GN=Eif4g1 PE=1 SV=1	261.15	1	0	11.81	176077	78	15	14	15	14	58	52	16.8965	13.1097	12.4185	13.9602	10.7898	10.8819	10.9778	12.7882	15.517	14.1743	13.3826	14.9853	11.5379	12.2233	12.3268	0.418611	0.714322	45	+		0.669859	0.3165	23.1667	+		-2.73676	0.0465678	44.3333	+	+	-2.48551	0.00842783	23.8333	+	+
sp|Q62448|IF4G2_MOUSE	Eif4g2	Eukaryotic translation initiation factor 4 gamma 2 OS=Mus musculus GN=Eif4g2 PE=1 SV=2	895.434	1	0	39.51	102106	56	27	27	33	33	176	176	16.5837	15.0795	19.6776	12.6441	13.7115	16.8566	16.7287	12.6888	19.8606	14.8252	19.141	12.1097	12.7261	15.4369	14.1682	0.487872	0.842465	56.5	+		-0.886021	0.558175	1	+		-0.99982	0.601084	23.5	+		-2.37371	0.342898	34	+
sp|Q80XI3|IF4G3_MOUSE	Eif4g3	Eukaryotic translation initiation factor 4 gamma 3 OS=Mus musculus GN=Eif4g3 PE=1 SV=2	137.462	1	0	2.79	174890	104	4	3	4	3	27	21	15.4597	9.99847	10.2988	10.6507	10.7898	10.8819	10.9778	11.9882	12.8316	11.6549	10.5808	11.1919	11.1523	10.9415	11.3406	-0.0371024	0.979388	16.1667	+		-0.0146221	0.967723	27.5	+		-0.442459	0.749351	23.5	+		-0.419979	0.495442	20.1667	+
sp|Q9WUK2|IF4H_MOUSE	Eif4h	Eukaryotic translation initiation factor 4H OS=Mus musculus GN=Eif4h PE=1 SV=3	165.752	1	0	40.32	27341	19	6	6	6	6	33	33	11.4939	13.3945	16.9161	16.6536	11.9624	10.4034	11.3775	11.9882	11.3515	11.188	17.1275	16.4606	10.7525	11.2598	10.4902	-0.582653	0.787835	4	+		-0.598697	0.265704	0	+		-3.18168	0.0584623	1	+		-3.19773	0.153822	3	+
sp|Q05D44|IF2P_MOUSE	Eif5b	Eukaryotic translation initiation factor 5B OS=Mus musculus GN=Eif5b PE=1 SV=2	15.461	1	0	1.73	137616	57	1	1	1	1	3	3	10.5982	9.99847	10.4455	10.7068	10.7898	10.8819	10.9778	11.9882	9.13483	10.785	10.5808	10.0867	10.8596	11.0634	11.3406	-0.290389	0.494593	5			-0.0715748	0.846031	0			0.722222	0.0644803	1.5			0.941036	0.0910528	3.5
sp|Q8K0G5|TSSC1_MOUSE	Eipr1	Protein TSSC1 OS=Mus musculus GN=Eipr1 PE=1 SV=2	13.395	1	0	3.37	43127	14	1	1	1	1	1	1	10.5982	13.0199	10.4455	10.6507	10.7898	10.8819	10.9778	11.9882	10.5327	12.4861	10.5808	10.2934	10.8596	11.0634	11.3406	-0.205269	0.805605	8.66667	+		-0.0715748	0.846031	0			-0.0190995	0.978363	1			0.114595	0.858941	7.66667	+
sp|P70372|ELAV1_MOUSE	Elavl1	ELAV-like protein 1 OS=Mus musculus GN=Elavl1 PE=1 SV=2	186.676	1	0	22.39	36169	18	7	7	7	7	48	48	14.5114	16.2454	15.1927	14.1029	12.6938	15.2157	15.2089	11.9882	16.3153	15.8609	15.668	16.4152	15.5617	16.1162	13.5989	1.05172	0.0807001	11	+		1.31562	0.316622	0	+		-1.23646	0.246425	4	+		-0.972562	0.208105	7	+
sp|P62869|ELOB_MOUSE	Elob	Elongin-B OS=Mus musculus GN=Elob PE=1 SV=1	175.084	1	0	77.97	13170	11	7	7	7	7	27	27	15.5482	15.0263	17.3299	15.6025	11.3687	11.5065	13.4583	13.4858	15.5065	13.9086	17.1838	14.2812	11.0267	11.0634	11.3406	-0.65672	0.489579	4	+		-1.31124	0.120189	0	+		-3.42193	0.00443343	2	+		-4.07645	0.00560242	2	+
sp|P83940|ELOC_MOUSE	Eloc	Elongin-C OS=Mus musculus GN=Eloc PE=1 SV=1	106.666	1	0	12.5	12473	8	1	1	2	2	18	18	13.5972	12.9631	14.7992	13.5161	10.7898	10.8819	10.9778	11.9882	12.7472	11.8412	14.5436	10.2934	10.8596	11.0634	11.3406	-1.36252	0.209036	1	+		-0.0715748	0.846031	0			-2.55944	0.00171475	0	+		-1.26849	0.283813	1	+
sp|Q91WG4|ELP2_MOUSE	Elp2	Elongator complex protein 2 OS=Mus musculus GN=Elp2 PE=1 SV=1	66.163	1	0	2.17	93093	43	1	1	1	1	3	3	11.9641	10.1407	10.4455	10.6507	10.7898	10.8819	10.9778	11.9882	10.0976	10.7806	10.5808	11.3021	10.8596	11.0634	11.3406	-0.109939	0.823889	12.5	+		-0.0715748	0.846031	2.66667			0.359223	0.490407	6.5	+		0.397586	0.265441	8.66667	+
sp|Q9CZX0|ELP3_MOUSE	Elp3	Elongator complex protein 3 OS=Mus musculus GN=Elp3 PE=1 SV=1	12.186	1	0	3.66	62385	34	1	1	1	1	1	1	10.5982	9.99847	10.4455	10.6507	10.7898	10.8819	10.9778	11.9882	9.93413	10.785	10.5808	10.2934	10.8596	11.0634	11.3406	-0.0248552	0.919806	1			-0.0715748	0.846031	0			0.736253	0.0585291	0			0.689533	0.0387237	1
sp|Q8C7X2|EMC1_MOUSE	Emc1	ER membrane protein complex subunit 1 OS=Mus musculus GN=Emc1 PE=1 SV=1	43.223	1	0	2.61	111605	52	3	3	3	3	9	9	10.5982	14.1295	12.294	10.6507	13.8231	10.8819	12.0245	11.9882	9.13483	15.0124	11.2491	10.2934	10.7161	12.7615	11.3406	-0.495626	0.755786	2.5	+		-0.573393	0.543593	0	+		0.261369	0.80885	1.5	+		0.183602	0.912472	1	+
sp|Q9CRD2|EMC2_MOUSE	Emc2	ER membrane protein complex subunit 2 OS=Mus musculus GN=Emc2 PE=1 SV=1	134.682	1	0	15.49	34935	16	4	4	4	4	17	17	10.5982	15.1548	10.4455	10.6507	10.7898	11.9424	10.9778	11.9882	10.1693	15.6351	11.3097	13.046	11.0818	11.6741	14.0096	0.827762	0.634393	1.5	+		0.830598	0.365713	0	+		-0.287689	0.81712	1.5			-0.284852	0.865134	0	+
sp|Q99KI3|EMC3_MOUSE	Emc3	ER membrane protein complex subunit 3 OS=Mus musculus GN=Emc3 PE=1 SV=3	30.911	1	0	5.36	29980	14	1	1	1	1	1	1	10.5982	12.0197	10.4455	10.6507	10.7898	10.8819	10.9778	11.9882	9.13483	11.3608	10.5808	10.2934	10.8596	11.0634	11.3406	-0.586041	0.358265	21.3333			-0.0715748	0.846031	7			0.230943	0.633825	17.8333			0.745409	0.239343	10.5
sp|Q9CZX9|EMC4_MOUSE	Emc4	ER membrane protein complex subunit 4 OS=Mus musculus GN=Emc4 PE=1 SV=1	27.834	1	0	6.56	20117	11	1	1	1	1	17	17	10.5982	11.3094	10.4455	10.6507	10.7898	10.8819	10.9778	11.9882	9.13483	12.6516	10.5808	10.2934	10.8596	11.0634	11.3406	-0.0857632	0.913464	18.6667			-0.0715748	0.846031	82.3333			0.40851	0.272468	52			0.422698	0.649136	49
sp|Q9EP72|EMC7_MOUSE	Emc7	ER membrane protein complex subunit 7 OS=Mus musculus GN=Emc7 PE=1 SV=1	23.916	1	0	4.15	26310	13	1	1	1	1	2	2	10.5982	11.2602	10.7653	10.6507	10.7898	11.463	12.044	11.9882	10.551	11.7342	10.5808	10.2934	10.8596	11.0634	11.3406	-0.0287199	0.938177	10.5	+		-0.483381	0.241686	1	+		0.752671	0.0617942	8.16667	+		0.298009	0.487359	3.33333	+
sp|O70378|EMC8_MOUSE	Emc8	ER membrane protein complex subunit 8 OS=Mus musculus GN=Emc8 PE=1 SV=1	74.195	1	0	14.98	23348	12	3	3	3	3	7	7	10.5982	14.0802	10.4455	10.6507	10.7898	10.8819	10.9778	11.9882	13.0957	14.6747	10.5808	10.2934	10.8596	11.0634	11.3406	0.717509	0.618826	2	+		-0.0715748	0.846031	0			-0.284188	0.768591	0			-1.07327	0.428173	2	+
sp|Q03173|ENAH_MOUSE	Enah	Protein enabled homolog OS=Mus musculus GN=Enah PE=1 SV=2	65.819	1	0	4.11	85844	29	2	2	2	2	18	18	10.47	10.8025	12.6012	9.86476	10.7898	10.8819	10.9778	11.9882	10.6465	10.7873	12.0721	10.0595	10.5084	11.0634	11.3406	-0.0432859	0.954347	1	+		-0.18867	0.647627	1			0.224811	0.741711	2	+		0.0794264	0.889175	0	+
sp|P17182|ENOA_MOUSE	Eno1	Alpha-enolase OS=Mus musculus GN=Eno1 PE=1 SV=3	1023.86	1	0	64.52	47141	28	24	20	25	21	269	182	18.539	18.1694	17.2773	18.1771	13.6063	17.4785	16.1518	15.5524	17.4762	18.4905	17.3058	18.6193	14.5345	15.9197	13.7383	-0.0677328	0.880667	29.8333	+		-0.966396	0.41645	0	+		-2.34344	0.0327698	8.33333	+	+	-3.2421	0.00463341	21.5	+	+
sp|P21550|ENOB_MOUSE	Eno3	Beta-enolase OS=Mus musculus GN=Eno3 PE=1 SV=3	338.244	1	0	20.97	47025	29	6	2	6	2	74	23	11.6632	10.2934	12.4392	13.1204	10.7898	14.4685	12.2404	11.9882	13.5129	13.087	14.1341	15.614	10.8596	12.9951	11.3406	2.20795	0.0360087	3	+		-0.639951	0.571238	0	+		0.492679	0.6324	1	+		-2.35522	0.0391175	2	+
sp|Q9D379|HYEP_MOUSE	Ephx1	Epoxide hydrolase 1 OS=Mus musculus GN=Ephx1 PE=1 SV=2	113.579	1	0	11.65	52577	32	7	7	7	7	19	19	10.5982	16.0898	10.4455	11.4126	12.8492	10.4673	10.9778	11.9882	10.5415	15.8113	10.5808	12.614	11.2592	12.0563	11.3406	0.250381	0.895178	46.5	+		-0.0186254	0.97866	6	+		-0.565856	0.707231	22	+		-0.834862	0.597576	30.5	+
sp|Q8CGC7|SYEP_MOUSE	Eprs	Bifunctional glutamate/proline--tRNA ligase OS=Mus musculus GN=Eprs PE=1 SV=4	461.429	1	0	13.43	170079	101	16	16	18	18	174	174	16.8599	16.5455	14.1421	16.0561	11.1481	10.8819	11.1263	11.9882	15.8401	16.6479	13.6642	16.7627	10.8596	11.0634	13.2749	-0.172199	0.860929	14.3333	+		0.446534	0.555629	0	+		-4.61479	0.000409987	9	+	+	-3.99606	0.0134106	5.33333	+	+
sp|Q60902|EP15R_MOUSE	Eps15l1	Epidermal growth factor receptor substrate 15-like 1 OS=Mus musculus GN=Eps15l1 PE=1 SV=3	58.541	1	0	3.42	99309	53	2	2	2	2	5	5	11.6926	9.99847	10.4455	10.6507	10.7898	10.8819	10.9778	11.9882	12.5761	10.785	10.5808	10.2934	10.8596	11.0634	11.3406	0.362049	0.585362	2			-0.0715748	0.846031	0			0.462659	0.347903	0			0.0290346	0.964532	2
sp|Q8BHK9|ERC6L_MOUSE	Ercc6l	DNA excision repair protein ERCC-6-like OS=Mus musculus GN=Ercc6l PE=1 SV=1	71.015	1	0	2.1	138854	62	2	2	2	2	10	10	11.936	10.0094	11.574	10.6507	10.7898	11.8096	10.9778	11.9882	10.3367	10.785	10.5808	10.2934	11.178	11.0634	11.3406	-0.543544	0.275078	3	+		-0.197395	0.605792	0			0.348852	0.534527	0	+		0.695001	0.00585442	3
sp|Q9DC16|ERGI1_MOUSE	Ergic1	Endoplasmic reticulum-Golgi intermediate compartment protein 1 OS=Mus musculus GN=Ergic1 PE=1 SV=1	10.254	1	0	3.45	32562	13	1	1	1	1	1	1	10.5982	13.4018	10.4455	10.6507	10.7898	10.8819	10.9778	11.9882	9.23138	13.1137	10.2273	10.2934	10.8596	11.0634	11.3406	-0.557542	0.629294	12.5	+		-0.0715748	0.846031	7.5			-0.114571	0.885613	9.5			0.371396	0.724275	10.5	+
sp|Q9CQE7|ERGI3_MOUSE	Ergic3	Endoplasmic reticulum-Golgi intermediate compartment protein 3 OS=Mus musculus GN=Ergic3 PE=1 SV=1	46.756	1	0	4.44	43208	16	2	2	2	2	5	5	10.5982	12.8448	10.6275	10.6507	10.7898	10.8819	10.9778	11.9882	9.66448	13.5344	10.5808	10.2934	10.8596	11.0634	11.3406	-0.161994	0.87946	54.5	+		-0.0715748	0.846031	0			-0.0208388	0.974323	20.5	+		0.0695801	0.948486	34	+
sp|P84089|ERH_MOUSE	Erh	Enhancer of rudimentary homolog OS=Mus musculus GN=Erh PE=1 SV=1	277.266	1	0	38.46	12259	6	5	5	8	8	266	266	12.2159	9.88183	12.7676	10.6507	18.8914	18.4281	18.0131	17.4858	11.1736	8.86031	11.2959	13.396	19.2429	18.5322	17.0127	-0.197526	0.868597	48.5	+		0.0580019	0.932816	35.8333	+		6.82559	8.79169e-05	55	+	+	7.08112	0.0021943	29.3333	+	+
sp|Q7TMF2|ERI1_MOUSE	Eri1	3'-5' exoribonuclease 1 OS=Mus musculus GN=Eri1 PE=1 SV=2	29.239	1	0	6.38	39493	18	2	2	2	2	2	2	11.6239	12.4582	11.963	17.8319	10.7898	11.7892	12.7278	11.9882	11.6696	10.9114	11.1582	16.2343	12.4254	13.6388	16.8805	-0.975868	0.631108	3.33333	+		2.49111	0.0943289	0	+		-1.64546	0.31994	1	+		1.82152	0.371763	2.33333	+
sp|Q8BFZ9|ERLN2_MOUSE	Erlin2	Erlin-2 OS=Mus musculus GN=Erlin2 PE=1 SV=1	85.946	1	1	7.06	37873	24	2	2	2	2	6	6	10.5982	14.295	10.4455	10.6507	10.7898	11.2158	10.9778	11.9882	9.13483	15.0474	10.5808	10.2934	10.8596	11.0634	11.3406	-0.233216	0.888876	5.5			-0.155045	0.660727	0			-0.254419	0.801872	3			-0.176248	0.913432	2.5
sp|Q3UVK0|ERMP1_MOUSE	Ermp1	Endoplasmic reticulum metallopeptidase 1 OS=Mus musculus GN=Ermp1 PE=1 SV=2	221.621	1	0	10.8	100148	38	7	7	7	7	25	25	10.5982	16.9082	14.1075	16.068	10.7898	16.1789	16.6196	13.7115	9.13483	16.7795	14.6035	15.0372	10.8596	15.6771	14.4802	-0.531745	0.814412	1.66667	+		-0.652683	0.756953	0	+		-0.0955122	0.962342	0	+		-0.21645	0.928698	1.66667	+
sp|Q99LC5|ETFA_MOUSE	Etfa	Electron transfer flavoprotein subunit alpha, mitochondrial OS=Mus musculus GN=Etfa PE=1 SV=2	591.076	1	0	66.37	35009	23	16	16	17	17	77	77	14.3487	17.6403	13.1563	11.0523	15.7271	13.2507	14.8845	11.9882	14.7027	18.153	12.6997	11.995	13.948	13.0531	13.984	0.338143	0.868014	41.8333	+		-0.300958	0.77989	0	+		-0.0868171	0.958765	14.8333	+		-0.725918	0.678799	27	+
sp|Q9DCW4|ETFB_MOUSE	Etfb	Electron transfer flavoprotein subunit beta OS=Mus musculus GN=Etfb PE=1 SV=3	258.646	1	0	47.84	27623	14	10	10	10	10	36	36	11.2808	17.461	10.9888	15.6732	11.4794	12.9889	11.5287	13.9668	14.0888	17.7545	11.7416	14.1435	10.9865	13.099	13.5183	0.581128	0.784673	3	+		0.0436625	0.965825	3	+		-1.36002	0.459369	5	+		-1.89748	0.291047	1	+
sp|Q921G7|ETFD_MOUSE	Etfdh	Electron transfer flavoprotein-ubiquinone oxidoreductase, mitochondrial OS=Mus musculus GN=Etfdh PE=1 SV=1	240.239	1	0	17.37	68091	37	9	9	9	9	43	43	11.7308	16.7262	10.8022	10.6507	13.0382	11.3114	10.9778	11.9882	12.4487	17.6231	11.2048	10.8668	12.3699	11.0634	11.7538	0.558428	0.801522	1.66667	+		-0.0999003	0.879016	0	+		-0.64852	0.681869	0	+		-1.30685	0.517978	1.66667	+
sp|Q9DCM0|ETHE1_MOUSE	Ethe1	Persulfide dioxygenase ETHE1, mitochondrial OS=Mus musculus GN=Ethe1 PE=1 SV=2	14.925	1	0	6.69	27739	18	1	1	1	1	1	1	10.5982	13.1276	12.3013	13.4726	11.1916	12.7098	13.5372	12.8844	11.0772	13.3926	12.7513	13.5593	10.8596	11.0634	12.9868	0.320157	0.721177	7	+		-0.944158	0.299572	0	+		0.205839	0.808052	5.5	+		-1.05848	0.28198	1.5	+
sp|Q61545|EWS_MOUSE	Ewsr1	RNA-binding protein EWS OS=Mus musculus GN=Ewsr1 PE=1 SV=2	452.167	1	0	17.1	68462	23	9	9	12	12	808	808	21.1008	17.9026	21.0536	17.8968	17.1917	17.6201	16.4159	14.3315	19.8863	18.1203	20.5756	18.0616	16.915	16.9613	14.5795	-0.327511	0.778842	54.5	+		-0.237867	0.835243	11.5	+		-3.09865	0.038375	33	+	+	-3.00901	0.0295327	33	+	+
sp|O35382|EXOC4_MOUSE	Exoc4	Exocyst complex component 4 OS=Mus musculus GN=Exoc4 PE=1 SV=2	53.659	1	0	3.69	110545	64	3	3	3	3	12	12	15.5117	12.9402	13.0025	11.0695	10.7898	11.0328	10.9778	11.9882	13.687	13.8972	12.4257	10.6237	10.8596	11.0634	11.2868	-0.472586	0.703062	10	+		-0.127243	0.719142	0			-1.93381	0.0880598	4	+		-1.58846	0.136374	6	+
sp|Q8R313|EXOC6_MOUSE	Exoc6	Exocyst complex component 6 OS=Mus musculus GN=Exoc6 PE=1 SV=2	13.041	1	0	1.25	93077	52	1	1	1	1	3	3	12.4616	8.96185	10.4455	10.6507	10.7898	10.8819	10.9778	11.9882	9.29194	9.97841	10.5808	10.2934	10.8596	11.0634	11.3406	-0.593747	0.469235	8.5	+		-0.0715748	0.846031	0			0.529552	0.517048	5.5	+		1.05172	0.0292722	3	+
sp|Q6PGF7|EXOC8_MOUSE	Exoc8	Exocyst complex component 8 OS=Mus musculus GN=Exoc8 PE=1 SV=1	13.22	1	0	1.54	81035	51	1	1	1	1	1	1	12.0996	9.59542	10.4455	10.6507	10.7898	10.8819	10.9778	11.9882	10.0429	10.5989	10.5808	10.2934	10.8596	11.0634	11.3406	-0.318765	0.5742	50.6667	+		-0.0715748	0.846031	0			0.461658	0.463821	18	+		0.708848	0.0149809	32.6667	+
sp|P97480|EYA3_MOUSE	Eya3	Eyes absent homolog 3 OS=Mus musculus GN=Eya3 PE=1 SV=2	25.253	1	0	2.75	55973	18	2	2	2	2	2	2	12.6931	9.99847	10.4455	10.6507	11.0504	10.8819	10.9778	11.9882	8.97995	10.785	10.5808	10.2934	11.5884	11.0634	11.3406	-0.787117	0.317833	1			0.106201	0.760154	0			0.277673	0.684424	1			1.17099	0.0650086	0
sp|P26040|EZRI_MOUSE	Ezr	Ezrin OS=Mus musculus GN=Ezr PE=1 SV=3	155.448	1	0	10.75	69407	37	6	1	7	1	26	2	10.5982	10.8445	10.1625	10.6507	10.7898	10.8819	10.9778	11.9882	9.13483	10.785	9.8679	10.2934	10.8596	10.9122	11.3406	-0.5437	0.200445	1	+		-0.121961	0.744307	0			0.595461	0.106575	0	+		1.0172	0.0655533	1
sp|O88792|JAM1_MOUSE	F11r	Junctional adhesion molecule A OS=Mus musculus GN=F11r PE=1 SV=2	33.196	1	0	4	32424	15	1	1	1	1	2	2	10.5982	13.6164	10.4455	10.6507	11.4263	10.8819	10.9778	11.9882	9.79177	13.4466	10.5808	10.2934	10.8596	11.0634	11.3406	-0.299512	0.798566	10.8333	+		-0.230707	0.504529	0			-0.00909431	0.991351	6.5			0.0597108	0.953782	4.33333	+
sp|P19221|THRB_MOUSE	F2	Prothrombin OS=Mus musculus GN=F2 PE=1 SV=1	706.199	1	1	39.81	70269	34	21	21	24	24	240	240	19.2211	16.8794	17.1473	14.9613	18.9	19.5283	19.419	17.4611	17.3813	17.0681	17.1871	15.9696	18.9246	19.4085	17.7444	-0.150732	0.876235	47.1667	+		-0.134598	0.854725	7.16667	+		1.77485	0.12405	21.6667	+		1.79098	0.023812	32.6667	+	+
sp|Q05816|FABP5_MOUSE	Fabp5	Fatty acid-binding protein, epidermal OS=Mus musculus GN=Fabp5 PE=1 SV=3	12.192	1	0	6.67	15137	10	1	1	1	1	3	3	14.5017	12.7162	13.5376	10.6507	10.7898	14.8794	15.1778	11.9882	11.9223	11.5805	14.7526	10.2934	12.4296	15.5907	11.8642	-0.714366	0.587461	2	+		0.0860194	0.959329	0	+		0.357248	0.801014	2	+		1.15763	0.468239	0	+
sp|Q920L1|FADS1_MOUSE	Fads1	Fatty acid desaturase 1 OS=Mus musculus GN=Fads1 PE=1 SV=1	41.22	1	0	5.59	52323	20	2	2	2	2	5	5	12.7082	12.9645	10.4455	10.6507	11.8288	10.8819	10.9778	11.9882	9.75914	14.1313	11.7037	12.3365	14.269	12.3459	11.3406	0.290455	0.804052	4	+		1.23264	0.181241	5.33333	+		-0.272994	0.718572	5	+		0.669189	0.625218	4.33333	+
sp|Q9Z0R9|FADS2_MOUSE	Fads2	Fatty acid desaturase 2 OS=Mus musculus GN=Fads2 PE=1 SV=1	40.412	1	0	5.41	52387	24	2	2	2	2	7	7	10.5982	14.477	10.4455	10.6507	10.7898	10.862	11.4971	11.9882	10.3903	14.5698	10.5808	10.2934	10.8596	11.0634	11.3406	-0.0842355	0.954859	9	+		-0.196404	0.603921	0	+		-0.258549	0.808215	5	+		-0.370717	0.77606	4	+
sp|Q9D2L9|F111A_MOUSE	Fam111a	Protein FAM111A OS=Mus musculus GN=Fam111a PE=2 SV=1	25.962	1	0	2.12	69949	31	1	1	1	1	1	1	10.5982	9.99847	10.4455	10.2566	10.7898	10.8819	10.9778	11.9882	9.13483	10.785	10.5808	9.93242	10.8596	11.0634	11.3406	-0.216421	0.602381	0			-0.0715748	0.846031	1			0.834765	0.0348472	0			0.979612	0.0840431	1
sp|Q9D281|NXP20_MOUSE	Fam114a1	Protein Noxp20 OS=Mus musculus GN=Fam114a1 PE=1 SV=1	258.987	1	0	26.36	61013	28	9	9	11	11	49	49	13.5706	15.0433	15.4443	13.0229	12.1896	15.6465	15.8221	12.7717	16.2308	15.0407	14.3751	11.8379	13.9457	16.0773	12.1358	0.100845	0.929515	1144.17	+		-0.0545386	0.971866	794.167	+		-0.162812	0.88822	1035.17	+		-0.318195	0.835373	903.167	+
sp|Q8VE88|F1142_MOUSE	Fam114a2	Protein FAM114A2 OS=Mus musculus GN=Fam114a2 PE=1 SV=2	332.094	1	0	35.81	54045	28	12	12	13	13	70	70	15.9755	16.2217	13.231	11.427	11.9545	10.8819	10.9778	11.9882	17.6845	17.1645	14.0834	12.5844	10.8596	11.0634	11.3406	1.16541	0.51376	13.5	+		-0.362745	0.378002	0			-2.76318	0.0590846	7	+		-4.29133	0.0317968	6.5	+	+
sp|Q6A0A9|F120A_MOUSE	FAM120A	Constitutive coactivator of PPAR-gamma-like protein 1 OS=Mus musculus GN=FAM120A PE=1 SV=2	304.703	1	0	13.22	121646	60	11	11	11	11	93	93	16.1492	15.7899	17.0217	17.6061	10.7047	10.8096	10.2937	16.5638	15.3877	16.1117	16.5027	16.7773	10.5805	11.327	14.4443	-0.446857	0.415611	0	+		0.0242909	0.9909	3	+		-4.54876	0.0261502	3	+		-4.07761	0.0117076	0	+
sp|Q8C3F2|F120C_MOUSE	Fam120c	Constitutive coactivator of PPAR-gamma-like protein 2 OS=Mus musculus GN=Fam120c PE=1 SV=3	10.935	1	0	0.92	119718	45	1	1	1	1	1	1	12.6098	11.7862	10.4455	10.6507	10.7898	10.716	10.9778	11.9882	10.4362	10.6311	10.5285	10.2934	11.6604	11.0558	11.3406	-0.900724	0.128952	24.6667	+		0.234301	0.563201	0	+		-0.255052	0.678894	9.5	+		0.879974	0.00344153	15.1667	+
sp|Q3UW53|NIBAN_MOUSE	Fam129a	Protein Niban OS=Mus musculus GN=Fam129a PE=1 SV=2	15.678	1	0	1.08	102649	43	1	1	1	1	2	2	14.4129	12.744	14.6474	11.4575	12.4858	15.2494	16.1991	12.4527	10.4894	15.3997	16.1099	12.2724	10.8596	15.913	11.3406	0.252386	0.873589	14.5	+		-1.39233	0.46517	1	+		0.78129	0.544955	7	+		-0.863423	0.693133	8.5	+
sp|Q8CDM8|F16B1_MOUSE	Fam160b1	Protein FAM160B1 OS=Mus musculus GN=Fam160b1 PE=1 SV=2	59.802	1	0	3.8	86017	41	3	2	3	2	5	4	10.5982	9.99847	10.4455	10.6507	10.7898	10.8819	10.9778	11.9882	14.574	10.785	10.5808	10.2934	10.8596	11.0634	11.3406	1.13511	0.308822	3			-0.0715748	0.846031	0			0.736253	0.0585291	1.5			-0.470434	0.711426	1.5
sp|Q80YR2|F16B2_MOUSE	Fam160b2	Protein FAM160B2 OS=Mus musculus GN=Fam160b2 PE=1 SV=2	26.411	1	0	2.28	82456	38	2	1	2	1	4	3	10.5982	9.99847	10.4455	10.6507	10.7898	10.8819	10.9778	11.9882	13.0665	10.785	10.5808	10.2934	10.8596	11.0634	11.3406	0.75824	0.289947	5.66667			-0.0715748	0.846031	0			0.736253	0.0585291	0			-0.0935615	0.907056	5.66667
sp|Q9D6U8|F162A_MOUSE	Fam162a	Protein FAM162A OS=Mus musculus GN=Fam162a PE=1 SV=1	139.32	1	0	34.84	17725	13	6	6	6	6	41	41	9.5749	17.587	11.364	11.7659	10.7898	12.963	10.9778	11.9882	10.6399	17.3416	10.5282	12.1081	10.8352	11.1882	11.3406	0.0814638	0.973633	23.5	+		-0.55837	0.400024	3.66667	+		-0.893271	0.639001	15.5	+		-1.53311	0.456639	11.6667	+
sp|Q8BGZ2|F168A_MOUSE	Fam168a	Protein FAM168A OS=Mus musculus GN=Fam168a PE=1 SV=1	27.563	1	0	4.1	26184	6	1	1	1	1	4	4	11.7535	10.9743	13.9771	10.6507	10.7898	10.9307	11.0714	11.9882	12.7094	12.6009	13.7949	10.2934	10.8596	11.0634	11.3406	0.510792	0.64411	2.66667	+		-0.107161	0.765833	0	+		-0.643837	0.449867	2.66667	+		-1.26179	0.21072	0	+
sp|Q91VU0|FAM3C_MOUSE	Fam3c	Protein FAM3C OS=Mus musculus GN=Fam3c PE=1 SV=1	15.774	1	0	5.29	24753	15	1	1	1	1	1	1	10.5982	11.9167	11.5374	11.0899	13.395	11.9903	12.4363	11.9882	9.06171	13.0272	12.1751	10.2934	13.3082	12.5343	11.3406	-0.146173	0.881736	1	+		-0.0581146	0.928831	0	+		1.16693	0.0369711	1	+		1.25498	0.330595	0	+
sp|Q9D7I8|FA83D_MOUSE	Fam83d	Protein FAM83D OS=Mus musculus GN=Fam83d PE=2 SV=1	38.65	1	0	3.93	64324	32	2	2	2	2	3	3	12.6639	11.4001	10.4455	10.6507	10.7898	10.8819	10.9778	11.9882	11.789	11.47	10.5808	10.2934	10.8596	11.0634	11.3406	-0.256727	0.690782	4.5	+		-0.0715748	0.846031	0			-0.130581	0.827626	2.5	+		0.0545707	0.905301	2	+
sp|Q9DCL2|FA96A_MOUSE	Fam96a	MIP18 family protein FAM96A OS=Mus musculus GN=Fam96a PE=1 SV=1	29.597	1	0	6.88	18418	8	1	1	1	1	2	2	10.7276	9.99847	10.4455	10.6507	10.7898	10.8819	10.9778	11.9882	11.0411	10.785	10.5808	10.2934	10.8596	11.0634	11.3406	0.219551	0.372002	8.5			-0.0715748	0.846031	0			0.703911	0.0723597	5			0.412786	0.120239	3.5
sp|Q3TJZ6|FA98A_MOUSE	Fam98a	Protein FAM98A OS=Mus musculus GN=Fam98a PE=1 SV=1	314	1	1	25.05	55055	24	10	8	11	8	41	30	12.0105	13.8473	14.6966	11.9843	10.7898	10.8819	10.9778	11.9882	15.4672	12.9065	14.6187	14.4617	10.8596	11.6265	11.3406	1.22886	0.204617	1.5	+		0.116129	0.771879	0			-1.97522	0.0360322	1.5	+		-3.08795	0.00538641	0	+
sp|Q80VD1|FA98B_MOUSE	Fam98b	Protein FAM98B OS=Mus musculus GN=Fam98b PE=1 SV=1	359.531	1	0	36.83	45349	29	11	9	12	9	52	41	14.5579	15.9476	17.269	16.5911	10.7898	16.9352	16.226	12.4517	15.964	15.1315	17.5248	14.9579	10.8596	13.7517	15.808	-0.196865	0.818939	0	+		-0.627575	0.7793	2	+		-1.99073	0.256478	2	+		-2.42144	0.141205	0	+
sp|Q8C0C7|SYFA_MOUSE	Farsa	Phenylalanine--tRNA ligase alpha subunit OS=Mus musculus GN=Farsa PE=1 SV=1	618.701	1	0	43.7	57599	30	19	19	21	21	131	131	18.4193	17.8301	17.7608	14.5759	10.7898	10.8819	12.4861	11.9882	20.0984	17.6234	16.7375	13.2298	14.5529	11.6555	12.0527	-0.224249	0.897348	26	+		1.21722	0.236582	1	+		-5.61002	0.00113481	9	+	+	-4.16855	0.0734265	18	+
sp|Q9WUA2|SYFB_MOUSE	Farsb	Phenylalanine--tRNA ligase beta subunit OS=Mus musculus GN=Farsb PE=1 SV=2	71.501	1	0	3.74	65697	41	2	2	2	2	5	5	15.2982	12.3877	10.4455	10.6507	10.7898	10.8819	10.9778	11.9882	11.8979	12.3203	10.5808	11.105	10.8596	11.0634	11.3406	-0.719509	0.567008	2	+		-0.0715748	0.846031	0			-1.03606	0.404785	2	+		-0.388121	0.452401	0	+
sp|P19096|FAS_MOUSE	Fasn	Fatty acid synthase OS=Mus musculus GN=Fasn PE=1 SV=2	20.803	1	0	0.44	272428	136	1	1	1	1	2	2	11.4178	9.66762	10.4455	10.6507	10.7898	10.8819	10.9778	11.9882	9.16801	10.5634	10.5808	10.1768	10.8596	11.0634	11.3406	-0.423131	0.420252	1	+		-0.0715748	0.846031	0			0.614055	0.226002	0	+		0.965611	0.0647553	1	+
sp|P62862|RS30_MOUSE	Fau	40S ribosomal protein S30 OS=Mus musculus GN=Fau PE=1 SV=1	21.134	1	0	16.95	6648	3	1	1	1	1	3	3	10.5982	14.4316	12.5091	12.8323	10.7898	10.8819	10.9778	11.9882	14.8276	11.2619	14.7428	10.2934	10.8596	12.4566	11.3406	0.188649	0.898152	2.5	+		0.392819	0.480248	5.16667			-1.43335	0.136692	2	+		-1.22917	0.433535	5.66667	+
sp|P35550|FBRL_MOUSE	Fbl	rRNA 2'-O-methyltransferase fibrillarin OS=Mus musculus GN=Fbl PE=1 SV=2	199.284	1	0	42.81	34307	25	9	9	9	9	94	94	14.5379	12.6149	14.9616	10.6507	18.7487	16.4162	18.0819	17.338	13.9531	13.9536	13.3696	14.3762	18.473	17.8942	16.4245	0.721834	0.501754	52.5	+		-0.0489773	0.952496	0	+		4.45494	0.00697011	33.5	+	+	3.68413	0.00127607	19	+	+
sp|Q80WS3|FBLL1_MOUSE	Fbll1	rRNA/tRNA 2'-O-methyltransferase fibrillarin-like protein 1 OS=Mus musculus GN=Fbll1 PE=1 SV=1	34.897	1	0	3.5	33339	20	1	1	1	1	8	8	10.5982	9.99847	10.4455	10.6507	12.5708	14.3905	15.9475	16.7386	12.0333	10.785	10.5808	12.9321	15.3742	15.9312	15.3168	1.15962	0.0890331	8.5	+		0.628901	0.592613	0	+		4.48865	0.00295302	5	+	+	3.95793	0.0020331	3.5	+
sp|Q91W61|FXL15_MOUSE	Fbxl15	F-box/LRR-repeat protein 15 OS=Mus musculus GN=Fbxl15 PE=1 SV=2	10.494	1	0	4	33125	15	1	1	1	1	1	1	10.3079	9.99847	10.4455	10.6507	10.921	10.8819	10.9778	11.9882	9.87964	10.785	9.77332	10.2934	10.8596	11.0634	11.3406	-0.167781	0.553761	28	+		-0.104381	0.768395	0			0.841629	0.0306385	10.3333			0.905029	0.0281821	17.6667	+
sp|Q8VBV4|FBXW7_MOUSE	Fbxw7	F-box/WD repeat-containing protein 7 OS=Mus musculus GN=Fbxw7 PE=1 SV=1	10.091	1	0	1.75	70547	41	1	1	1	1	2	2	10.5982	15.3139	10.4455	10.6507	12.0773	10.8819	10.9778	11.9882	9.13483	16.6161	10.5808	10.2934	10.8596	11.0634	11.3406	-0.0957712	0.964423	4			-0.393451	0.365623	0			-0.27074	0.833121	2			-0.56842	0.787048	2
sp|Q8CIB5|FERM2_MOUSE	Fermt2	Fermitin family homolog 2 OS=Mus musculus GN=Fermt2 PE=1 SV=1	117.652	1	0	7.65	77800	39	4	4	4	4	24	24	16.166	11.8805	11.5391	10.6507	10.7898	10.8819	10.9778	11.9882	11.4401	13.2118	11.1102	10.8821	10.8596	11.0634	11.3406	-0.897988	0.527418	7.83333	+		-0.0715748	0.846031	0			-1.39961	0.309576	0	+		-0.5732	0.409601	7.83333	+
sp|P97807|FUMH_MOUSE	Fh	Fumarate hydratase, mitochondrial OS=Mus musculus GN=Fh PE=1 SV=3	223.996	1	0	12.82	54357	32	5	5	5	5	33	33	10.5982	15.9021	13.09	10.6507	10.7898	11.273	10.9778	11.9882	13.5551	15.8537	12.0123	10.2934	10.8596	11.0634	11.3406	0.368392	0.837894	16.6667	+		-0.169346	0.632218	0			-1.30303	0.349263	5.5	+		-1.84076	0.246239	11.1667	+
sp|P97447|FHL1_MOUSE	Fhl1	Four and a half LIM domains protein 1 OS=Mus musculus GN=Fhl1 PE=1 SV=3	357.199	1	0	58.57	31889	17	14	14	14	14	115	115	17.8771	17.492	16.3867	15.2254	11.3233	13.1084	10.9778	11.9882	17.604	16.4284	16.1206	15.9661	9.94627	11.0634	14.5625	-0.215524	0.769452	1	+		0.00794565	0.99532	0	+		-4.89586	0.000658848	0	+		-4.67239	0.0131844	1	+
sp|O70433|FHL2_MOUSE	Fhl2	Four and a half LIM domains protein 2 OS=Mus musculus GN=Fhl2 PE=1 SV=1	393.888	1	0	52.69	32073	21	14	14	14	14	253	253	16.192	15.1178	16.8829	12.7248	16.6274	18.4214	18.2565	17.4439	15.6091	14.312	16.5221	16.0626	17.5123	18.2479	17.6571	0.397045	0.712492	1	+		0.118495	0.829892	0	+		2.45789	0.0492014	0	+		2.17934	0.0144586	1	+
sp|Q9CS72|FLIP1_MOUSE	Filip1	Filamin-A-interacting protein 1 OS=Mus musculus GN=Filip1 PE=1 SV=2	9.687	1	0	1.16	137599	83	1	1	1	1	1	1	9.85291	9.99847	10.4455	10.6507	10.7898	10.8819	10.9778	12.7658	8.28094	10.785	10.5808	10.2934	10.5484	11.0634	11.3406	-0.25183	0.692382	5			-0.369726	0.559352	20.3333			1.11696	0.0701555	11.5			0.999068	0.218235	13.8333
sp|Q9D824|FIP1_MOUSE	Fip1l1	Pre-mRNA 3'-end-processing factor FIP1 OS=Mus musculus GN=Fip1l1 PE=1 SV=1	16.985	1	0	2.24	64959	25	1	1	1	1	1	1	10.5982	9.99847	11.585	11.3341	10.7898	13.3528	10.9778	13.3383	12.3863	12.3207	12.8019	11.6687	10.8596	11.0634	11.3406	1.41545	0.0165653	25	+	+	-1.02681	0.281109	0	+		1.23573	0.172364	13.5	+		-1.20653	0.0101911	11.5	+	+
sp|Q9CQ92|FIS1_MOUSE	Fis1	Mitochondrial fission 1 protein OS=Mus musculus GN=Fis1 PE=1 SV=1	205.97	1	0	32.24	17009	8	5	5	5	5	45	45	12.1766	13.3358	15.2139	10.6507	10.7898	10.8819	10.9778	11.9882	15.8553	14.2518	14.7483	10.6098	10.8596	12.4917	11.3406	1.02207	0.518059	26	+		0.404523	0.473811	0			-1.68477	0.143678	9	+		-2.30232	0.161945	17	+
sp|Q6P9Q6|FKB15_MOUSE	Fkbp15	FK506-binding protein 15 OS=Mus musculus GN=Fkbp15 PE=1 SV=2	84.224	1	0	2.71	132961	63	2	2	2	2	9	9	11.2479	9.99847	10.4455	10.6507	10.7898	10.8819	10.9778	11.9882	12.2983	10.785	10.5808	10.2934	10.8596	11.0634	11.3406	0.403768	0.464912	59			-0.0715748	0.846031	0			0.573823	0.182628	34.5			0.0984807	0.863089	24.5
sp|Q9JJ28|FLII_MOUSE	Flii	Protein flightless-1 homolog OS=Mus musculus GN=Flii PE=1 SV=1	206.798	1	0	11.25	144803	68	10	10	10	10	26	26	14.2774	16.3106	13.8958	15.2673	10.6087	14.0631	15.2578	11.9882	15.9168	15.0958	12.6502	13.8823	10.9473	11.0634	14.3448	-0.551512	0.56072	5.33333	+		-0.860934	0.600948	0	+		-1.95835	0.145768	3	+		-2.26777	0.131196	2.33333	+
sp|Q8VHX6|FLNC_MOUSE	Flnc	Filamin-C OS=Mus musculus GN=Flnc PE=1 SV=3	372.266	1	2	7.59	291119	164	15	15	15	15	48	48	12.1695	12.2945	17.461	13.3051	10.7898	12.637	10.9778	11.866	13.5611	12.5315	17.0304	13.7234	10.8596	13.3997	14.3787	0.404079	0.806832	2	+		1.3117	0.251645	0	+		-2.23985	0.13946	1	+		-1.33223	0.400442	1	+
sp|O08917|FLOT1_MOUSE	Flot1	Flotillin-1 OS=Mus musculus GN=Flot1 PE=1 SV=1	49.747	1	0	4.91	47513	31	2	2	2	2	2	2	10.5982	9.82802	10.4455	10.6507	12.7005	10.8819	13.8899	11.9882	9.13483	12.8213	10.5808	10.2934	11.6971	11.0634	11.3406	0.327013	0.694633	1			-0.998087	0.247375	0	+		1.98453	0.0236364	0	+		0.659434	0.5077	1
sp|Q6ZPF4|FMNL3_MOUSE	Fmnl3	Formin-like protein 3 OS=Mus musculus GN=Fmnl3 PE=1 SV=2	17.765	1	0	1.17	117169	65	1	1	1	1	2	2	10.5982	9.99847	10.4455	10.6507	10.7898	10.8819	10.9778	11.9882	8.26139	10.785	10.5808	10.2934	10.8596	11.0634	11.3406	-0.443039	0.488336	2			-0.0715748	0.846031	0			0.736253	0.0585291	1			1.10772	0.173435	1
sp|P35922|FMR1_MOUSE	Fmr1	Synaptic functional regulator FMR1 OS=Mus musculus GN=Fmr1 PE=1 SV=1	322.887	1	0	24.59	68989	36	12	10	12	10	173	138	16.0785	15.9749	14.7675	13.9427	16.6454	16.5911	17.0374	16.2932	15.8642	16.3531	14.867	15.0426	16.8054	17.559	16.0765	0.340844	0.602074	8	+		0.171871	0.686181	0	+		1.45088	0.0347515	5.5	+	+	1.28191	0.0661099	2.5	+
sp|P11276|FINC_MOUSE	Fn1	Fibronectin OS=Mus musculus GN=Fn1 PE=1 SV=4	168.737	1	0	4.8	272538	117	10	10	10	10	37	37	10.7529	14.7153	13.1973	10.5267	12.4734	14.3295	16.1908	13.0989	11.4182	15.7467	11.9355	10.1875	11.2606	15.4299	11.2216	0.0239264	0.988305	21.6667	+		-1.38574	0.403129	0	+		1.72507	0.232225	11	+		0.315408	0.870463	10.6667	+
sp|A2AKG8|FOCAD_MOUSE	Focad	Focadhesin OS=Mus musculus GN=Focad PE=1 SV=1	30.101	1	0	0.72	198950	88	1	1	1	1	4	4	13.4314	9.99847	11.3928	10.6988	10.7898	10.8819	10.9778	11.9882	9.77535	10.785	11.647	10.463	10.8596	11.0634	11.3406	-0.712777	0.426737	12.3333	+		-0.0715748	0.846031	0			-0.220918	0.789487	2	+		0.420283	0.416057	10.3333	+
sp|Q9ES18|FOXJ2_MOUSE	Foxj2	Forkhead box protein J2 OS=Mus musculus GN=Foxj2 PE=2 SV=1	13.687	1	0	2.48	61570	17	1	1	1	1	4	4	10.6797	11.653	10.8435	10.6507	10.7898	10.8819	10.9778	11.9882	11.3226	11.8807	10.5818	10.2934	10.8596	11.0634	11.3406	0.0629315	0.888472	5.33333	+		-0.0715748	0.846031	1.5			0.202744	0.598973	4.83333	+		0.0682382	0.883144	2	+
sp|O08696|FOXM1_MOUSE	Foxm1	Forkhead box protein M1 OS=Mus musculus GN=Foxm1 PE=1 SV=2	17.309	1	0	2.11	83694	43	1	1	1	1	1	1	10.5982	9.99847	10.4455	10.6507	10.7898	10.8819	10.9778	11.9882	11.4056	10.785	10.5808	10.2934	10.8596	11.0634	11.3406	0.343013	0.264059	1			-0.0715748	0.846031	0			0.736253	0.0585291	0			0.321665	0.336052	1
sp|Q9R1E0|FOXO1_MOUSE	Foxo1	Forkhead box protein O1 OS=Mus musculus GN=Foxo1 PE=1 SV=2	51.698	1	0	2.3	69518	28	1	1	1	1	7	7	10.5982	9.99847	10.4455	10.6507	10.7898	12.9325	10.9778	11.9882	12.8683	10.785	10.5808	10.2934	10.8596	13.1414	11.3406	0.708697	0.286501	86			0.108444	0.900618	0			1.24889	0.0522962	30.6667			0.648642	0.506061	55.3333
sp|P58462|FOXP1_MOUSE	Foxp1	Forkhead box protein P1 OS=Mus musculus GN=Foxp1 PE=1 SV=1	15.172	1	0	1.56	78833	25	1	1	1	1	1	1	9.80684	10.8839	9.8562	10.0991	10.8508	10.8819	10.9778	11.9416	9.11308	11.234	10.5808	9.41488	10.6269	10.7346	10.5273	-0.0758269	0.895912	22.6667	+		-0.533497	0.148782	0	+		1.00153	0.0321606	4	+		0.543862	0.398754	18.6667	+
sp|Q91WJ8|FUBP1_MOUSE	Fubp1	Far upstream element-binding protein 1 OS=Mus musculus GN=Fubp1 PE=1 SV=1	89.204	1	0	8.29	68540	38	5	4	5	4	17	16	10.602	13.9903	13.8266	11.0991	15.4443	14.1501	14.0734	11.9882	14.2961	13.8087	14.7905	10.7059	15.7069	14.6582	11.4201	1.02078	0.455437	6	+		0.0143929	0.992032	0	+		1.53451	0.227231	4	+		0.528116	0.74452	2	+
sp|P56959|FUS_MOUSE	Fus	RNA-binding protein FUS OS=Mus musculus GN=Fus PE=1 SV=1	987.323	1	0	27.22	52673	17	16	16	23	23	3070	3070	20.7944	19.8528	20.9588	18.9442	23.8246	23.8823	24.4172	23.7717	20.4966	19.5466	20.779	21.0666	23.8575	24.1261	23.9173	0.334607	0.579396	6.5	+		-0.00701	0.971926	35.5	+		3.83639	0.000228836	27.1667	+	+	3.49477	0.000310507	14.8333	+	+
sp|P11370|ENV2_MOUSE	Fv4	Retrovirus-related Env polyprotein from Fv-4 locus OS=Mus musculus GN=Fv4 PE=1 SV=2	133.802	1	1	6.19	74453	35	4	4	4	4	12	12	10.5982	17.1686	11.5632	10.6507	10.7898	14.2829	14.1801	13.5679	12.4375	13.8615	14.1526	10.2934	10.8596	12.7033	11.3406	0.191092	0.919068	31	+		-1.57069	0.203851	0	+		0.710034	0.702921	16.5	+		-1.05175	0.398717	14.5	+
sp|Q61584|FXR1_MOUSE	Fxr1	Fragile X mental retardation syndrome-related protein 1 OS=Mus musculus GN=Fxr1 PE=1 SV=2	377.272	1	0	22.3	76222	42	14	13	14	13	151	118	17.3948	17.1656	16.712	15.479	16.5792	17.0436	17.6412	15.9167	16.8983	17.5803	16.6144	16.2803	16.8037	17.8382	16.315	0.155474	0.770215	1	+		0.190468	0.752703	0	+		0.107338	0.854749	0	+		0.142332	0.786463	1	+
sp|Q9WVR4|FXR2_MOUSE	Fxr2	Fragile X mental retardation syndrome-related protein 2 OS=Mus musculus GN=Fxr2 PE=1 SV=1	245.217	1	0	19.91	73743	42	9	7	9	7	107	72	15.0896	15.2513	13.2752	12.6018	14.5609	15.8616	15.8036	14.9592	14.819	15.3032	13.4338	13.9293	14.546	16.3161	15.1192	0.316849	0.699901	4.5	+		0.0308022	0.959559	0	+		1.24185	0.1413	2	+		0.955802	0.209331	2.5	+
sp|Q91Z49|UIF_MOUSE	Fyttd1	UAP56-interacting factor OS=Mus musculus GN=Fyttd1 PE=1 SV=1	55.626	1	0	4.1	35887	21	1	1	1	1	9	9	10.5982	9.99847	10.4394	10.6507	12.5828	12.395	13.8918	13.6105	9.71175	10.785	10.5808	10.2934	14.8498	14.0001	12.5026	-0.0789439	0.784673	4.5			0.664161	0.400166	1	+		2.69832	0.000512449	2.5	+		3.44142	0.00293504	3	+
sp|P97855|G3BP1_MOUSE	G3bp1	Ras GTPase-activating protein-binding protein 1 OS=Mus musculus GN=G3bp1 PE=1 SV=1	597.979	1	0	43.01	51829	27	15	14	19	17	229	215	17.909	16.5801	17.3182	18.5928	15.0109	13.66	13.3092	13.8826	18.1905	17.1173	17.8834	19.1413	13.3754	14.8261	17.3702	0.483094	0.45069	157.167	+		1.22489	0.303887	32	+		-3.63433	0.000664629	130	+	+	-2.89254	0.0459244	59.1667	+	+
sp|P97379|G3BP2_MOUSE	G3bp2	Ras GTPase-activating protein-binding protein 2 OS=Mus musculus GN=G3bp2 PE=1 SV=2	250.89	1	0	25.93	54088	28	9	8	11	9	76	62	17.0086	15.4352	17.0784	15.6239	13.5415	11.7849	12.7487	13.3841	16.9258	16.3242	17.1282	16.4873	12.8045	13.9984	13.3465	0.429861	0.402353	2	+		0.518291	0.391724	0	+		-3.42171	0.00118253	1	+		-3.33328	0.000259652	1	+
sp|Q99KY4|GAK_MOUSE	Gak	Cyclin-G-associated kinase OS=Mus musculus GN=Gak PE=1 SV=2	259.64	1	1	15.94	143641	71	15	15	15	15	37	37	15.2861	14.2584	13.9802	10.6507	10.7898	12.5599	11.2745	11.9882	16.6051	14.2182	13.1921	10.2132	11.0757	11.0634	11.3406	0.0132951	0.993877	111.667	+		-0.493248	0.339559	100.333	+		-1.89072	0.129818	140.5	+		-2.39726	0.186995	71.5	+
sp|Q9R0N0|GALK1_MOUSE	Galk1	Galactokinase OS=Mus musculus GN=Galk1 PE=1 SV=2	70.066	1	0	10.97	42295	17	3	3	3	3	6	6	14.7533	11.3924	10.4455	10.6507	10.7898	10.8819	10.9778	11.9882	12.5054	11.3535	10.5808	10.2934	10.8596	11.0634	11.3406	-0.627177	0.594835	1	+		-0.0715748	0.846031	0			-0.651014	0.554346	1	+		-0.0954117	0.879149	0	+
sp|Q6PB93|GALT2_MOUSE	Galnt2	Polypeptide N-acetylgalactosaminyltransferase 2 OS=Mus musculus GN=Galnt2 PE=1 SV=1	29.694	1	0	6.67	64514	35	4	4	4	4	13	13	13.7885	16.0201	13.2003	10.6507	12.4867	12.0072	10.8787	11.9882	11.6833	17.0668	13.1437	10.2934	11.0788	12.9625	11.3406	-0.368095	0.847299	4.66667	+		-0.0462834	0.944868	0	+		-1.57468	0.221675	2.66667	+		-1.25287	0.516853	2	+
sp|P16858|G3P_MOUSE	Gapdh	Glyceraldehyde-3-phosphate dehydrogenase OS=Mus musculus GN=Gapdh PE=1 SV=2	499.259	1	1	35.14	35810	21	7	7	10	10	192	192	15.8997	17.5461	15.0667	17.9597	12.6032	18.1674	14.8707	13.9234	16.9668	18.3361	15.9292	17.3546	13.2864	16.5293	15.5099	0.528594	0.554378	34.6667	+		0.21736	0.898299	1	+		-1.7269	0.253971	15.5	+		-2.03814	0.0956465	20.1667	+
sp|Q9CY66|GAR1_MOUSE	Gar1	H/ACA ribonucleoprotein complex subunit 1 OS=Mus musculus GN=Gar1 PE=1 SV=1	136.797	1	0	29.44	23474	16	6	6	6	6	91	91	14.1322	13.654	15.4186	10.6507	20.9715	16.9942	18.6945	17.9435	13.0136	13.5121	14.4697	13.3503	20.3116	18.8502	17.1466	0.122596	0.911384	84.1667	+		0.118535	0.928813	2	+		5.18706	0.00766723	39.8333	+	+	5.183	0.00171417	46.3333	+	+
sp|Q08369|GATA4_MOUSE	Gata4	Transcription factor GATA-4 OS=Mus musculus GN=Gata4 PE=1 SV=4	456.167	1	4	20.41	44580	12	8	8	9	9	35	35	10.5982	11.3844	16.0537	11.9073	10.7898	10.8819	11.7253	13.4298	16.6167	11.9886	15.5965	11.5922	10.8596	11.0634	12.5842	1.46262	0.437175	0	+		-0.204263	0.820671	14.5	+		-0.779199	0.588609	9.5	+		-2.44608	0.178918	5	+
sp|Q8VHR5|P66B_MOUSE	Gatad2b	Transcriptional repressor p66-beta OS=Mus musculus GN=Gatad2b PE=1 SV=1	45.225	1	0	6.06	65411	36	3	3	3	3	6	6	12.5739	9.99847	13.273	10.6507	10.7902	10.8819	10.9778	11.9882	13.1826	10.785	12.9566	9.7629	11.3655	11.0634	11.3406	0.0477576	0.967923	36.6667	+		0.0969675	0.786786	4			-0.464488	0.593318	21.1667	+		-0.415278	0.692609	19.5	+
sp|Q99JT1|GATB_MOUSE	Gatb	Glutamyl-tRNA(Gln) amidotransferase subunit B, mitochondrial OS=Mus musculus GN=Gatb PE=1 SV=1	8.001	1	0	1.26	62118	32	1	1	1	1	1	1	11.0583	14.8192	10.4455	10.6507	10.4768	10.8318	10.9778	11.9882	9.21915	13.4471	10.5808	10.2934	10.8596	11.2036	11.3406	-0.858282	0.554643	2	+		0.0659465	0.876026	0	+		-0.674737	0.556111	1	+		0.249492	0.825665	1	+
sp|P21614|VTDB_MOUSE	Gc	Vitamin D-binding protein OS=Mus musculus GN=Gc PE=1 SV=2	291.649	1	0	29.62	53600	25	9	9	10	10	113	113	15.9067	15.8094	16.4209	17.1702	16.0708	16.4626	15.4478	15.2323	14.8405	15.7804	16.519	15.5576	16.2601	16.5118	15.6014	-0.652411	0.21045	2	+		0.32107	0.463068	0	+		-0.523404	0.259778	1	+		0.450077	0.380187	1	+
sp|Q8CHG3|GCC2_MOUSE	Gcc2	GRIP and coiled-coil domain-containing protein 2 OS=Mus musculus GN=Gcc2 PE=1 SV=2	67.381	1	0	0.83	194445	127	1	1	1	1	4	4	10.5982	9.99847	10.5001	10.6507	10.7898	10.8819	10.756	11.9882	11.1225	10.785	10.5808	10.2934	10.8596	11.0634	11.3406	0.258574	0.303274	8.5			-0.0161169	0.966859	5.16667			0.667126	0.0908652	8			0.392436	0.158747	5.66667
sp|E9PVA8|GCN1_MOUSE	Gcn1	eIF-2-alpha kinase activator GCN1 OS=Mus musculus GN=Gcn1 PE=1 SV=1	745.549	1	0	11.83	293021	175	25	25	26	26	88	88	18.1035	15.8474	15.6956	15.7742	13.5795	14.8397	15.0365	15.2775	17.5434	15.3495	15.3489	16.7039	15.2623	14.0912	13.9961	-0.118725	0.886209	15.6667	+		-0.233436	0.695529	0	+		-1.67186	0.0530671	5	+		-1.78658	0.0567497	10.6667	+
sp|Q9CRY7|GDPD1_MOUSE	Gdpd1	Glycerophosphodiester phosphodiesterase domain-containing protein 1 OS=Mus musculus GN=Gdpd1 PE=1 SV=1	14.068	1	0	3.82	35867	19	1	1	1	1	3	3	10.5982	13.2013	10.4455	10.6507	10.7898	10.8819	10.9778	11.9882	9.13483	13.4488	10.5808	10.2934	10.8596	11.0634	11.3406	-0.359444	0.761124	4.5			-0.0715748	0.846031	0			-0.0644653	0.93129	1.5			0.223404	0.84576	3
sp|Q8BX17|GEMI5_MOUSE	Gemin5	Gem-associated protein 5 OS=Mus musculus GN=Gemin5 PE=1 SV=2	18.266	1	0	0.47	166592	92	1	1	1	1	1	1	19.2186	19.0104	19.0809	19.266	21.8014	18.9983	19.4519	18.4903	19.9061	19.7332	19.5383	18.9517	21.357	19.9923	22.839	0.388391	0.122166	1.5	+		1.71061	0.18264	0	+		0.541527	0.488796	0	+		1.86375	0.0511368	1.5	+
sp|Q9D1H7|GET4_MOUSE	Get4	Golgi to ER traffic protein 4 homolog OS=Mus musculus GN=Get4 PE=1 SV=2	273.941	1	0	25.38	36525	16	6	6	8	8	74	74	16.626	14.6639	10.6497	15.3878	10.7898	14.2117	10.9778	13.4572	16.1855	12.3283	10.9849	16.0617	11.5057	12.0837	16.3867	-0.441757	0.818874	35.8333	+		0.966222	0.582778	50.8333	+		-1.97272	0.251848	43.3333	+		-0.564746	0.791328	43.3333	+
sp|P47856|GFPT1_MOUSE	Gfpt1	Glutamine--fructose-6-phosphate aminotransferase [isomerizing] 1 OS=Mus musculus GN=Gfpt1 PE=1 SV=3	631.369	1	1	39.02	78539	47	20	20	21	21	113	113	16.9598	17.1879	11.0903	11.813	17.1257	14.1933	15.1859	12.4501	17.5216	16.1729	12.1267	12.8378	12.6318	12.5808	15.5162	0.402022	0.853388	25.8333	+		-1.16248	0.447699	7.5	+		0.476009	0.810556	16	+		-1.08849	0.558386	17.3333	+
sp|Q6P5E6|GGA2_MOUSE	Gga2	ADP-ribosylation factor-binding protein GGA2 OS=Mus musculus GN=Gga2 PE=1 SV=1	25.262	1	0	5.47	66049	29	3	3	3	3	5	5	13.8867	8.09897	10.4455	10.6507	11.6037	10.8819	10.9778	11.9882	11.7971	10.2764	10.5808	9.68052	12.3538	11.0634	10.7266	-0.186751	0.887899	5.5	+		0.0183631	0.973117	0	+		0.592454	0.643876	3	+		0.797569	0.287897	2.5	+
sp|Q91VC9|GHITM_MOUSE	Ghitm	Growth hormone-inducible transmembrane protein OS=Mus musculus GN=Ghitm PE=1 SV=1	55.279	1	0	6.07	37275	14	2	2	3	3	11	11	13.6526	12.784	11.3506	10.6507	10.7898	10.8819	12.6879	11.9882	11.2897	15.083	11.3932	10.2934	10.8596	11.1071	14.6551	-0.0946419	0.94223	2	+		0.620319	0.615583	0	+		-0.522515	0.54696	0	+		0.192446	0.909689	2	+
sp|Q99MR1|GGYF1_MOUSE	Gigyf1	GRB10-interacting GYF protein 1 OS=Mus musculus GN=Gigyf1 PE=1 SV=2	201.572	1	0	11.49	116238	52	9	9	9	9	34	34	15.3444	12.5696	14.5613	10.6507	10.7898	10.8819	10.9778	11.9882	15.9574	13.293	13.6148	10.4862	10.8596	11.5194	11.3406	0.0563309	0.971976	2.5	+		0.0804267	0.836025	0			-2.12204	0.0994763	2.5	+		-2.09795	0.177213	0	+
sp|Q6Y7W8|GGYF2_MOUSE	Gigyf2	GRB10-interacting GYF protein 2 OS=Mus musculus GN=Gigyf2 PE=1 SV=2	1073.32	1	0	27.73	149193	62	29	29	35	35	221	221	15.3114	16.9873	19.3654	15.1497	11.0391	12.1262	9.72319	18.9869	18.5159	17.1898	18.6948	13.3292	11.4588	11.7785	17.7099	0.228964	0.889932	13.8333	+		0.680224	0.828322	0	+		-3.7346	0.153429	3.5	+		-3.28334	0.204556	10.3333	+
sp|Q9Z0G0|GIPC1_MOUSE	Gipc1	PDZ domain-containing protein GIPC1 OS=Mus musculus GN=Gipc1 PE=1 SV=1	34.883	1	0	4.2	36129	18	1	1	1	1	2	2	10.5982	11.0303	10.4455	10.6507	10.7898	10.8819	10.9778	11.9882	11.7259	11.4831	10.5808	10.2934	10.8596	11.0634	11.3406	0.339652	0.390767	1	+		-0.0715748	0.846031	0			0.478292	0.168288	1			0.0670659	0.880858	0	+
sp|Q68FF6|GIT1_MOUSE	Git1	ARF GTPase-activating protein GIT1 OS=Mus musculus GN=Git1 PE=1 SV=1	130.719	1	0	8.57	85300	47	6	4	6	4	21	13	14.2938	10.4164	11.808	10.6507	10.7898	10.8819	10.9778	11.9882	12.7075	10.4677	10.5808	10.2934	10.8596	11.0634	11.3406	-0.779867	0.487226	14.5	+		-0.0715748	0.846031	0			-0.632759	0.521806	9	+		0.0755333	0.916151	5.5	+
sp|Q9JLQ2|GIT2_MOUSE	Git2	ARF GTPase-activating protein GIT2 OS=Mus musculus GN=Git2 PE=1 SV=2	74.812	1	0	9.89	78766	38	5	3	5	3	12	4	13.3714	9.99847	10.2961	10.6507	10.7898	10.8819	10.9778	11.9882	12.764	10.785	10.6262	10.2934	10.8596	11.0634	11.3406	0.0379833	0.969588	62.8333	+		-0.0715748	0.846031	0			0.080282	0.925581	26	+		-0.0292761	0.966885	36.8333	+
sp|Q64516|GLPK_MOUSE	Gk	Glycerol kinase OS=Mus musculus GN=Gk PE=1 SV=2	143.912	1	0	9.84	61227	31	5	5	5	5	13	13	12.3221	14.338	10.4455	10.6507	13.2898	10.8819	10.9778	11.9882	10.0086	15.2229	10.5808	10.2934	12.3417	11.0634	11.3406	-0.412643	0.796719	7	+		-0.202559	0.794888	0			-0.15462	0.889136	4	+		0.0554635	0.971936	3	+
sp|Q9JMB0|GKAP1_MOUSE	Gkap1	G kinase-anchoring protein 1 OS=Mus musculus GN=Gkap1 PE=1 SV=1	212.048	1	0	39.07	41763	24	9	9	9	9	34	34	13.8198	12.5741	13.709	10.6507	11.0453	11.9049	10.5359	13.194	16.2032	12.1096	12.9891	11.7526	10.8596	11.0634	12.4565	0.575257	0.662144	58.8333	+		-0.210147	0.804642	0	+		-1.01838	0.318941	20.6667	+		-1.80378	0.215006	38.1667	+
sp|Q61543|GSLG1_MOUSE	Glg1	Golgi apparatus protein 1 OS=Mus musculus GN=Glg1 PE=1 SV=1	1030.01	1	0	36.09	133734	68	36	36	37	37	137	137	15.2844	19.1399	14.2312	13.1616	14.8628	14.6798	13.6409	13.4588	15.2602	19.2173	13.2209	13.542	16.74	14.7289	12.8244	-0.144161	0.941855	74	+		0.603865	0.585144	8.5	+		-1.29371	0.375127	43.1667	+		-0.545679	0.783732	39.3333	+
sp|D3Z7P3|GLSK_MOUSE	Gls	Glutaminase kidney isoform, mitochondrial OS=Mus musculus GN=Gls PE=1 SV=1	167.384	1	0	16.62	73964	42	7	7	7	7	22	22	10.5982	15.12	10.4455	10.6507	10.7898	10.8819	10.9778	11.9882	9.13483	15.4061	10.5808	10.2934	10.8596	11.0634	11.3406	-0.349784	0.851905	10.5			-0.0715748	0.846031	0			-0.544119	0.659163	5.5			-0.265909	0.877883	5
sp|P26443|DHE3_MOUSE	Glud1	Glutamate dehydrogenase 1, mitochondrial OS=Mus musculus GN=Glud1 PE=1 SV=1	94.824	1	0	8.96	61337	37	4	4	4	4	12	12	10.5982	14.8576	10.8782	10.6507	10.7898	10.8819	10.9778	12.167	9.52557	15.3653	10.5808	11.0664	10.8596	11.0634	11.3406	-0.111627	0.948325	3.5	+		-0.116257	0.782905	0			-0.542016	0.636101	1.5	+		-0.546646	0.734528	2	+
sp|P01642|KV5A9_MOUSE	Gm10881	Ig kappa chain V-V region L7 (Fragment) OS=Mus musculus GN=Gm10881 PE=1 SV=1	108.113	1	0	23.48	12615	6	2	2	2	2	219	219	17.4985	15.0768	16.2162	17.1456	15.9383	17.266	17.1796	16.5188	15.4811	15.4388	15.7773	16.6764	17.6125	17.8778	17.0256	-0.64089	0.33622	10.8333	+		0.779654	0.12536	0	+		0.241388	0.712433	7.5	+		1.66193	0.00889687	3.33333	+
sp|P01639|KV5A7_MOUSE	Gm5571	Ig kappa chain V-V region MOPC 41 OS=Mus musculus GN=Gm5571 PE=1 SV=1	224.716	1	0	28.46	14311	5	4	4	4	4	73	73	11.8321	15.7478	16.8735	17.556	15.0619	17.6862	17.554	16.618	15.9085	12.8955	15.8411	17.4709	15.2269	17.4705	17.8693	0.0266432	0.987224	2	+		0.125525	0.904304	0	+		1.22765	0.418863	1	+		1.32653	0.36209	1	+
sp|Q922H4|GMPPA_MOUSE	Gmppa	Mannose-1-phosphate guanyltransferase alpha OS=Mus musculus GN=Gmppa PE=1 SV=1	210	1	0	21.67	46244	20	7	7	7	7	37	37	15.9398	11.1	10.4455	10.6507	10.7898	10.8819	10.9778	11.9882	17.1	13.0245	10.5808	10.2934	10.8596	11.0634	11.3406	0.715722	0.738601	305	+		-0.0715748	0.846031	274.833			-0.874522	0.537735	339.333	+		-1.66182	0.414018	240.5	+
sp|Q3THK7|GUAA_MOUSE	Gmps	GMP synthase [glutamine-hydrolyzing] OS=Mus musculus GN=Gmps PE=1 SV=2	20.149	1	0	3.46	76723	49	2	2	2	2	5	5	13.265	11.032	11.8365	12.9531	10.7898	12.2065	14.2002	11.9882	11.7322	10.785	11.9657	10.2934	10.8596	11.0634	12.3888	-1.07756	0.147459	27.6667	+		-0.858916	0.396993	9.83333	+		0.0245317	0.978527	20	+		0.243172	0.708872	17.5	+
sp|P21278|GNA11_MOUSE	Gna11	Guanine nucleotide-binding protein subunit alpha-11 OS=Mus musculus GN=Gna11 PE=1 SV=1	114.229	1	2	22.84	42024	23	7	5	7	5	16	11	12.1734	15.5098	14.239	10.6507	13.7812	11.2852	10.9778	11.9882	12.1528	14.9131	12.4005	10.2934	12.8435	11.0634	12.4002	-0.703242	0.641833	9.66667	+		0.0942467	0.917682	0	+		-1.13508	0.398052	1	+		-0.337593	0.79122	8.66667	+
sp|P27601|GNA13_MOUSE	Gna13	Guanine nucleotide-binding protein subunit alpha-13 OS=Mus musculus GN=Gna13 PE=1 SV=1	96.085	1	2	10.88	44055	26	4	3	4	3	23	22	11.6073	16.7345	11.7105	10.6507	10.7898	14.9876	13.146	11.9882	12.4624	16.0311	12.1625	10.2934	11.4986	13.7026	11.3406	0.0616367	0.974123	7	+		-0.547328	0.676131	0	+		0.0521779	0.975634	5	+		-0.556787	0.734851	2	+
sp|P30678|GNA15_MOUSE	Gna15	Guanine nucleotide-binding protein subunit alpha-15 OS=Mus musculus GN=Gna15 PE=2 SV=1	12.664	1	0	2.14	43536	24	1	1	1	1	1	1	10.5982	12.5197	12.7541	11.0616	13.9958	11.5121	11.4911	12.3952	9.13483	15.3604	13.0196	10.2934	11.9301	13.2227	11.3406	0.218692	0.888539	2	+		-0.184089	0.834605	0	+		0.615145	0.4675	1	+		0.212363	0.906437	1	+
sp|P08752|GNAI2_MOUSE	Gnai2	Guanine nucleotide-binding protein G(i) subunit alpha-2 OS=Mus musculus GN=Gnai2 PE=1 SV=5	321.558	1	5	38.31	40489	20	11	7	11	7	43	24	10.9185	16.5118	10.4455	10.6507	12.2856	14.5827	11.7247	11.9882	10.8537	15.9003	10.5808	10.1831	14.0696	12.1353	11.3406	-0.252095	0.903287	1	+		-0.130103	0.904453	0	+		0.513699	0.759563	0	+		0.635691	0.728673	1	+
sp|Q9DC51|GNAI3_MOUSE	Gnai3	Guanine nucleotide-binding protein G(k) subunit alpha OS=Mus musculus GN=Gnai3 PE=1 SV=3	210.071	1	4	30.23	40538	17	9	5	9	5	31	12	10.7728	14.8313	10.9212	10.6507	11.3857	12.4517	11.5316	11.9882	11.8249	14.5706	11.2868	10.2934	10.8596	11.6269	11.3406	0.199931	0.888441	3	+		-0.56358	0.159565	3.5	+		0.0453094	0.966734	1	+		-0.718201	0.542425	5.5	+
sp|P18872|GNAO_MOUSE	Gnao1	Guanine nucleotide-binding protein G(o) subunit alpha OS=Mus musculus GN=Gnao1 PE=1 SV=3	123.603	1	1	17.51	40085	18	5	3	5	3	20	6	10.5982	14.3102	14.7174	10.6507	11.3301	14.1937	13.8379	11.9882	13.8985	12.6912	15.7942	12.2096	10.8596	14.3384	11.3406	1.07925	0.464025	8	+		-0.657938	0.61527	0	+		0.268371	0.846104	4	+		-1.46882	0.313878	4	+
sp|P21279|GNAQ_MOUSE	Gnaq	Guanine nucleotide-binding protein G(q) subunit alpha OS=Mus musculus GN=Gnaq PE=1 SV=4	53.035	1	1	17.83	42158	23	6	4	6	4	15	10	12.1905	14.3616	10.4455	10.6507	13.1312	11.6063	11.4225	11.9882	9.13483	14.2515	11.6601	10.2934	12.185	11.0634	11.3406	-0.577067	0.699489	68	+		-0.507384	0.385777	0	+		0.12501	0.902904	37	+		0.194693	0.889545	31	+
sp|P63094|GNAS2_MOUSE	Gnas	Guanine nucleotide-binding protein G(s) subunit alpha isoforms short OS=Mus musculus GN=Gnas PE=1 SV=1	134.999	2	1	20.3	45664	22	6	5	6	5	29	17	12.5302	16.1841	10.9845	14.6393	10.7898	12.029	10.9778	11.9882	13.8982	15.8582	10.5808	10.2934	10.8596	11.0634	11.3406	-0.92686	0.618527	9.66667	+		-0.358346	0.415889	0			-2.13831	0.122769	3.33333	+		-1.5698	0.370173	6.33333	+
sp|P62874|GBB1_MOUSE	Gnb1	Guanine nucleotide-binding protein G(I)/G(S)/G(T) subunit beta-1 OS=Mus musculus GN=Gnb1 PE=1 SV=3	397.181	1	1	41.47	37377	13	10	6	10	6	56	30	13.0259	17.2702	14.7025	15.0217	10.7898	14.689	14.4628	16.0149	14.5764	17.4882	13.2178	13.5855	11.0169	12.5535	16.1617	-0.288067	0.832337	1	+		-0.745092	0.702185	0	+		-1.01594	0.501181	0	+		-1.47297	0.429366	1	+
sp|P62880|GBB2_MOUSE	Gnb2	Guanine nucleotide-binding protein G(I)/G(S)/G(T) subunit beta-2 OS=Mus musculus GN=Gnb2 PE=1 SV=3	305.8	1	1	36.18	37331	13	9	4	9	4	44	12	11.8981	17.5803	12.3395	10.6507	14.6952	13.5582	10.9778	11.9882	14.6368	16.6147	11.1694	10.2934	14.5151	13.3862	11.3406	0.0614706	0.977902	8.5	+		0.275778	0.833697	3	+		-0.312247	0.863319	5	+		-0.0979397	0.961216	6.5	+
sp|P29387|GBB4_MOUSE	Gnb4	Guanine nucleotide-binding protein subunit beta-4 OS=Mus musculus GN=Gnb4 PE=1 SV=4	138.691	1	1	13.53	37379	14	4	1	4	1	27	8	10.5982	11.9871	10.4455	10.6507	10.7898	10.8819	10.9778	11.9882	9.13483	13.2718	10.5808	10.2934	10.8596	11.0634	11.3406	-0.100155	0.919084	0			-0.0715748	0.846031	2.5			0.239085	0.617363	2.5			0.267666	0.807462	0
sp|Q9DAS9|GBG12_MOUSE	Gng12	Guanine nucleotide-binding protein G(I)/G(S)/G(O) subunit gamma-12 OS=Mus musculus GN=Gng12 PE=1 SV=3	19.354	1	0	15.28	7997	5	1	1	1	1	5	5	10.5982	12.1401	10.3328	10.6507	10.7962	12.2434	10.9778	11.9882	10.0526	11.9566	10.5808	10.2934	10.8596	10.8434	11.3406	-0.209579	0.734815	23.8333	+		-0.486868	0.32652	0	+		0.57097	0.335393	10.8333	+		0.293681	0.597989	13	+
sp|Q6PGG6|GNL3L_MOUSE	Gnl3l	Guanine nucleotide-binding protein-like 3-like protein OS=Mus musculus GN=Gnl3l PE=1 SV=1	20.496	1	0	3.12	65195	33	1	1	1	1	2	2	10.5982	14.2116	15.5718	16.4058	10.7898	16.9027	16.7834	16.1145	14.9852	13.5426	14.9597	16.2845	10.8596	15.2724	16.7236	0.746151	0.61294	1.66667	+		-0.862388	0.720119	0	+		0.950753	0.642341	0	+		-0.657786	0.701025	1.66667	+
sp|Q91VW5|GOGA4_MOUSE	Golga4	Golgin subfamily A member 4 OS=Mus musculus GN=Golga4 PE=1 SV=2	84.334	1	0	2.73	257564	163	5	5	5	5	16	16	14.881	14.4784	15.6413	14.3997	12.0064	15.9567	15.853	15.8	11.8684	15.2661	16.279	14.4065	16.3156	16.368	14.662	-0.3951	0.702266	1.5	+		0.877815	0.509247	3.5	+		0.0539313	0.959039	1.5	+		1.32685	0.323005	3.5	+
sp|Q8BXA1|GOLI4_MOUSE	Golim4	Golgi integral membrane protein 4 OS=Mus musculus GN=Golim4 PE=1 SV=1	43.191	1	0	6.87	76785	38	3	3	3	3	6	6	10.5982	12.2801	10.4455	10.6507	10.7898	10.8819	10.9778	11.9882	5.90401	12.5964	10.5808	10.2934	10.8596	11.0634	11.3406	-1.14993	0.464972	4	+		-0.0715748	0.846031	0			0.165857	0.757611	3			1.24421	0.490247	1	+
sp|Q9CRA5|GOLP3_MOUSE	Golph3	Golgi phosphoprotein 3 OS=Mus musculus GN=Golph3 PE=1 SV=1	64.696	1	0	5.37	33752	17	1	1	1	1	3	3	10.5982	9.99847	10.7426	10.6507	10.7898	10.7348	10.9778	11.9882	9.11013	10.785	10.2338	10.2934	10.8596	11.0634	11.3406	-0.391909	0.356383	4	+		-0.0347966	0.927942	0			0.625181	0.114184	2			0.982294	0.0734499	2	+
sp|Q99JX3|GORS2_MOUSE	Gorasp2	Golgi reassembly-stacking protein 2 OS=Mus musculus GN=Gorasp2 PE=1 SV=3	190.627	1	0	15.52	47038	16	5	5	5	5	39	39	12.8213	12.2105	16.0143	10.6507	10.7898	10.8819	11.7313	11.9882	15.5294	13.2175	15.3346	10.2934	10.8596	11.0634	11.3406	0.669549	0.700596	1	+		-0.259937	0.518547	0			-1.57639	0.225228	0	+		-2.50587	0.143688	1	+
sp|P05202|AATM_MOUSE	Got2	Aspartate aminotransferase, mitochondrial OS=Mus musculus GN=Got2 PE=1 SV=1	89.5	1	0	14.19	47411	31	5	5	5	5	11	11	10.8844	15.4279	10.4455	10.6507	10.7898	10.8819	10.9778	11.9882	12.8823	14.6826	11.3375	10.2934	11.0824	11.9017	11.3406	0.446863	0.780157	4.33333	+		0.282128	0.498804	0	+		-0.692655	0.592988	0	+		-0.85739	0.489185	4.33333	+
sp|Q3ULJ0|GPD1L_MOUSE	Gpd1l	Glycerol-3-phosphate dehydrogenase 1-like protein OS=Mus musculus GN=Gpd1l PE=1 SV=2	20.468	1	0	3.42	38226	26	1	1	1	1	4	4	12.8884	11.665	12.3799	12.5436	10.7898	10.8819	10.9778	11.9882	12.0476	12.2331	12.5432	11.4084	10.8596	11.0634	11.3406	-0.31112	0.410386	17.5	+		-0.0715748	0.846031	2			-1.20976	0.0189153	11	+	+	-0.970211	0.0249189	8.5	+
sp|Q64521|GPDM_MOUSE	Gpd2	Glycerol-3-phosphate dehydrogenase, mitochondrial OS=Mus musculus GN=Gpd2 PE=1 SV=2	28.587	1	0	3.58	80954	49	2	2	2	2	4	4	10.5982	10.9126	11.8703	10.6507	10.7898	10.8819	11.9564	11.9882	9.13483	13.5477	10.5808	11.2839	10.8596	13.3844	11.3406	0.12889	0.898225	3	+		0.457435	0.571218	0			0.396176	0.404619	2	+		0.724721	0.591891	1	+
sp|Q8BUV3|GEPH_MOUSE	Gphn	Gephyrin OS=Mus musculus GN=Gphn PE=1 SV=2	17.656	1	0	1.95	83282	48	1	1	1	1	1	1	10.5982	9.99847	10.4455	10.6507	10.7898	10.8819	10.9778	11.9882	11.4893	10.785	10.5808	10.2934	10.8596	11.0634	11.3406	0.363932	0.263101	56.3333			-0.0715748	0.846031	0			0.736253	0.0585291	21.5			0.300746	0.394932	34.8333
sp|P06745|G6PI_MOUSE	Gpi	Glucose-6-phosphate isomerase OS=Mus musculus GN=Gpi PE=1 SV=4	84.026	1	1	4.66	62767	33	2	2	2	2	8	8	12.4842	13.0237	12.9558	11.9928	14.0293	13.0282	13.2378	13.1698	11.6675	13.9842	13.4326	10.2934	13.6469	13.1894	12.2454	-0.269648	0.768828	13.5	+		-0.339052	0.472104	2	+		0.752195	0.0620711	6	+		0.682792	0.546426	9.5	+
sp|Q56A08|GPKOW_MOUSE	Gpkow	G patch domain and KOW motifs-containing protein OS=Mus musculus GN=Gpkow PE=1 SV=2	28.088	1	0	3.89	53832	28	2	2	2	2	6	6	10.4329	11.6048	11.0127	10.6507	10.7898	10.8819	10.9778	11.9882	13.778	12.5897	11.0752	10.2934	11.4736	10.9012	11.3406	1.00881	0.264055	3.66667	+		0.0789934	0.835148	0	+		0.234183	0.559026	1	+		-0.695629	0.48884	2.66667	+
sp|Q5U4C1|GASP1_MOUSE	Gprasp1	G-protein coupled receptor-associated sorting protein 1 OS=Mus musculus GN=Gprasp1 PE=1 SV=1	19.328	1	0	0.89	151745	76	1	1	1	1	1	1	10.5982	11.4663	11.682	10.6507	10.7898	10.8819	10.9778	11.9882	9.20982	10.785	10.5808	10.2934	10.8596	11.0634	11.3406	-0.882012	0.0961489	19.5	+		-0.0715748	0.846031	0			0.0601725	0.883538	12	+		0.87061	0.0993368	7.5
sp|Q8BUY8|GASP2_MOUSE	Gprasp2	G-protein coupled receptor-associated sorting protein 2 OS=Mus musculus GN=Gprasp2 PE=1 SV=2	115.014	1	0	5.21	92802	41	3	3	3	3	5	5	10.5982	9.99847	14.3886	10.6507	10.7898	10.8819	10.9778	11.9882	8.91763	9.06656	13.8813	10.2934	10.8596	11.0634	11.3406	-0.869274	0.590785	3.33333	+		-0.0715748	0.846031	0			-0.249544	0.818732	2			0.548155	0.706081	1.33333	+
sp|Q99LD4|CSN1_MOUSE	Gps1	COP9 signalosome complex subunit 1 OS=Mus musculus GN=Gps1 PE=1 SV=1	31.081	1	0	3.18	53442	26	1	1	1	1	8	8	12.0703	9.99847	10.4455	10.6507	10.7898	10.8819	10.9778	11.9882	8.98358	10.785	10.272	10.2934	10.8596	11.0634	11.3406	-0.707728	0.275959	1	+		-0.0715748	0.846031	0			0.368215	0.511183	1			1.00437	0.0859306	0	+
sp|Q6IR34|GPSM1_MOUSE	Gpsm1	G-protein-signaling modulator 1 OS=Mus musculus GN=Gpsm1 PE=1 SV=3	28.585	1	0	3.12	74362	40	2	1	2	1	3	1	11.7932	9.99847	10.4455	10.6507	10.7898	10.8819	10.8434	11.9882	9.29224	10.785	10.5808	10.2934	10.8596	10.9964	11.3406	-0.484082	0.375261	2.5			-0.0602925	0.873997	0			0.403876	0.431076	1.5			0.827665	0.0991994	1
sp|Q8VDU0|GPSM2_MOUSE	Gpsm2	G-protein-signaling modulator 2 OS=Mus musculus GN=Gpsm2 PE=1 SV=2	58.281	1	0	6.77	75591	40	3	2	3	2	4	2	10.5982	10.7204	11.3778	10.6507	10.7898	10.8819	10.9778	11.9882	9.38968	10.785	11.4707	10.2934	13.2572	11.0634	11.3406	-0.352057	0.485666	132.333	+		0.7276	0.323626	60.5			0.322695	0.370043	100.667	+		1.40235	0.130278	92.1667	+
sp|O70325|GPX41_MOUSE	Gpx4	Phospholipid hydroperoxide glutathione peroxidase, mitochondrial OS=Mus musculus GN=Gpx4 PE=1 SV=4	18.035	2	0	7.11	22229	15	1	1	1	1	4	4	10.5982	13.564	13.6736	13.4662	10.7898	10.8819	11.2107	11.9882	13.1277	11.0275	13.5672	13.6752	11.1406	11.0634	11.3406	0.0239189	0.981076	2	+		-0.0361513	0.916899	0			-1.60782	0.0886283	0	+		-1.66789	0.0726091	2	+
sp|Q60760|GRB10_MOUSE	Grb10	Growth factor receptor-bound protein 10 OS=Mus musculus GN=Grb10 PE=1 SV=2	133.548	1	0	13.53	70585	31	7	7	7	7	32	32	14.817	11.4097	13.9281	10.6507	14.9385	10.8819	11.5672	11.9882	15.9876	11.4348	12.7794	11.2572	10.8596	11.0634	11.3406	0.163418	0.915612	2	+		-1.25608	0.291145	0	+		-0.357397	0.79819	2	+		-1.7769	0.230194	0	+
sp|Q9JLM9|GRB14_MOUSE	Grb14	Growth factor receptor-bound protein 14 OS=Mus musculus GN=Grb14 PE=1 SV=1	35.066	1	0	1.86	60573	30	1	1	2	2	11	11	11.6013	10.2907	11.5572	10.6507	10.7898	10.8819	10.9778	11.9882	10.4617	10.9089	10.8368	10.2934	10.8596	11.0634	11.3406	-0.399725	0.309569	4.33333	+		-0.0715748	0.846031	0			0.134509	0.765487	1	+		0.462659	0.0789542	3.33333	+
sp|Q91Z53|GRHPR_MOUSE	Grhpr	Glyoxylate reductase/hydroxypyruvate reductase OS=Mus musculus GN=Grhpr PE=1 SV=1	22.053	1	0	2.13	35329	15	1	1	1	1	2	2	12.5991	10.3305	10.5959	10.6507	10.7898	10.7984	10.7089	12.3573	9.67633	10.8313	10.974	9.80129	10.8596	10.7731	12.0591	-0.723317	0.289625	2.66667	+		0.0670135	0.913327	0	+		0.119547	0.86171	0	+		0.909877	0.146546	2.66667	+
sp|P28798|GRN_MOUSE	Grn	Granulins OS=Mus musculus GN=Grn PE=1 SV=2	312.426	1	0	16.13	63458	24	7	7	8	8	69	69	14.4344	13.1723	15.6035	12.3346	17.1722	15.9181	14.5873	15.2452	13.051	13.8865	14.075	11.9709	18.1559	15.3678	14.9526	-0.64035	0.485903	6.5	+		0.428028	0.704403	0	+		1.84454	0.0876029	3.5	+		2.91291	0.0349998	3	+
sp|Q99LP6|GRPE1_MOUSE	Grpel1	GrpE protein homolog 1, mitochondrial OS=Mus musculus GN=Grpel1 PE=1 SV=1	11.113	1	0	5.07	24307	17	1	1	1	1	2	2	10.5982	12.938	10.4455	10.6507	10.7898	10.8819	10.9778	11.9882	9.13483	11.5867	10.5808	10.2934	10.8596	11.0634	11.3406	-0.759138	0.367986	0			-0.0715748	0.846031	2			0.00136684	0.998408	2			0.68893	0.308624	0
sp|Q810D6|GRWD1_MOUSE	Grwd1	Glutamate-rich WD repeat-containing protein 1 OS=Mus musculus GN=Grwd1 PE=1 SV=2	273.126	1	0	30.49	49224	20	7	7	9	9	19	19	10.5982	11.11	10.4455	17.6234	10.7898	10.8819	11.7584	11.9882	11.115	13.9089	11.0833	17.858	12.1018	12.3384	12.889	1.04703	0.672524	10	+		1.08849	0.044775	8.5	+	+	-1.08967	0.558296	10.1667	+		-1.04821	0.605312	8.33333	+
sp|Q9EST1|GSDMA_MOUSE	Gsdma	Gasdermin-A OS=Mus musculus GN=Gsdma PE=2 SV=1	34.058	1	2	3.81	49593	28	2	2	2	2	9	9	13.5213	10.9345	14.102	11.3128	14.2903	13.0248	14.5612	11.9882	12.0547	13.5664	14.7879	12.2401	15.4659	15.3204	11.3406	0.694665	0.51904	8	+		0.576145	0.683456	0	+		0.998514	0.351366	2	+		0.879995	0.545989	6	+
sp|Q9D8T2|GSDMD_MOUSE	Gsdmdc1	Gasdermin-D OS=Mus musculus GN=Gsdmdc1 PE=1 SV=1	33.375	1	0	2.46	53238	27	1	1	1	1	8	8	12.9293	10.0331	12.2528	10.6507	10.7898	10.8819	10.9778	11.9882	11.3203	10.785	11.027	10.732	10.8596	11.0634	11.3406	-0.500388	0.494976	16.6667	+		-0.0715748	0.846031	0			-0.307038	0.689084	3.33333	+		0.121775	0.563936	13.3333	+
sp|Q9WV60|GSK3B_MOUSE	Gsk3b	Glycogen synthase kinase-3 beta OS=Mus musculus GN=Gsk3b PE=1 SV=2	14.206	1	0	5.71	46710	25	1	1	1	1	1	1	10.5982	9.99847	10.4455	11.264	10.7898	10.8819	10.9778	11.9882	9.13483	10.785	10.5808	13.3259	10.8596	11.0634	11.3406	0.380103	0.690562	12			-0.0715748	0.846031	0			0.582924	0.178584	4			0.131246	0.904229	8
sp|P10648|GSTA2_MOUSE	Gsta2	Glutathione S-transferase A2 OS=Mus musculus GN=Gsta2 PE=1 SV=3	17.411	2	0	4.05	25542	14	1	1	1	1	2	2	10.5982	11.7439	12.8924	13.4807	10.7898	13.6746	13.7743	12.584	9.13483	12.1637	15.1267	13.3535	10.8596	14.9425	11.3406	0.265894	0.8569	18.6667	+		-0.324771	0.820018	0	+		0.526894	0.596334	1	+		-0.063771	0.97369	17.6667	+
sp|P10649|GSTM1_MOUSE	Gstm1	Glutathione S-transferase Mu 1 OS=Mus musculus GN=Gstm1 PE=1 SV=2	280.871	1	0	44.04	25970	17	10	7	11	8	105	54	10.3364	13.7679	14.0604	17.3045	10.1564	12.575	10.9778	11.8552	10.2718	13.7473	14.2632	16.4595	9.98392	12.4406	11.3406	-0.181858	0.927442	25.5	+		-0.136055	0.880501	29	+		-2.47619	0.153899	34	+		-2.43039	0.195662	20.5	+
sp|P15626|GSTM2_MOUSE	Gstm2	Glutathione S-transferase Mu 2 OS=Mus musculus GN=Gstm2 PE=1 SV=2	322.421	1	3	73.39	25717	17	15	11	16	12	116	59	15.0651	12.6614	16.235	17.9704	12.1133	10.5878	12.8164	11.9882	15.9989	13.4893	15.7739	17.3508	12.809	13.5548	15.9489	0.170277	0.905279	16.1667	+		2.22776	0.0691935	0	+		-3.60652	0.0244342	8.33333	+	+	-1.54904	0.265298	7.83333	+
sp|P48774|GSTM5_MOUSE	Gstm5	Glutathione S-transferase Mu 5 OS=Mus musculus GN=Gstm5 PE=1 SV=1	207.691	1	0	47.77	26635	18	10	8	10	8	87	48	15.4138	15.9591	17.3429	17.2053	14.6678	14.3739	10.9778	11.9882	15.1683	15.4243	16.9873	16.1344	11.2143	14.2559	11.8336	-0.551679	0.410743	1	+		-0.567368	0.685362	0	+		-3.4783	0.0142592	0	+		-3.49399	0.012347	1	+
sp|O09131|GSTO1_MOUSE	Gsto1	Glutathione S-transferase omega-1 OS=Mus musculus GN=Gsto1 PE=1 SV=2	25.738	1	0	4.17	27498	17	1	1	1	1	8	8	10.0597	9.99847	10.4455	10.6507	10.9887	10.8819	10.9778	11.9882	9.13483	10.785	10.5808	10.2934	11.3343	11.0634	11.3406	-0.0900528	0.829471	11.5			0.0369053	0.912098	3.5			0.920605	0.0231244	8.5			1.04756	0.0642897	6.5
sp|P19157|GSTP1_MOUSE	Gstp1	Glutathione S-transferase P 1 OS=Mus musculus GN=Gstp1 PE=1 SV=2	625.857	1	1	76.67	23609	12	9	9	16	16	129	129	16.5244	18.1468	19.5909	19.0434	12.1251	14.59	15.4721	14.7553	18.6668	17.7868	19.3018	20.5988	11.883	16.9833	18.539	0.762158	0.42665	108.833	+		1.56615	0.445082	0	+		-4.09078	0.0061449	43	+	+	-3.28679	0.131033	65.8333	+
sp|Q64471|GSTT1_MOUSE	Gstt1	Glutathione S-transferase theta-1 OS=Mus musculus GN=Gstt1 PE=1 SV=4	27.837	1	0	12.5	27374	12	3	3	3	3	9	9	14.1054	11.5377	14.249	12.3063	12.1001	10.8819	12.5325	11.9882	13.8699	11.878	13.8761	11.3153	12.1437	11.6153	12.1044	-0.314729	0.750598	35.8333	+		0.0788058	0.864722	0	+		-1.17389	0.171867	12.5	+		-0.780358	0.375241	23.3333	+
sp|P62915|TF2B_MOUSE	Gtf2b	Transcription initiation factor IIB OS=Mus musculus GN=Gtf2b PE=1 SV=1	41.703	1	0	4.43	34819	24	1	1	1	1	3	3	12.3816	11.0756	10.4455	10.6507	10.7898	10.8819	10.9778	11.9882	11.0568	12.081	10.5808	10.8559	10.8596	11.0634	11.3406	0.00529743	0.992548	7.83333	+		-0.0715748	0.846031	2.5			0.0211113	0.968722	4	+		-0.0557609	0.895733	6.33333	+
sp|Q9ESZ8|GTF2I_MOUSE	Gtf2i	General transcription factor II-I OS=Mus musculus GN=Gtf2i PE=1 SV=3	1985.82	1	1	61.82	112265	61	60	60	70	70	696	696	19.3388	21.2278	21.4435	18.2103	15.729	18.0832	16.9121	18.8079	21.6289	21.3361	20.3635	17.7931	15.6596	17.7258	18.7911	0.225327	0.853279	37.1667	+		0.0091131	0.993763	82.3333	+		-2.67201	0.0407939	58.1667	+	+	-2.88822	0.0748195	61.3333	+
sp|O08582|GTPB1_MOUSE	Gtpbp1	GTP-binding protein 1 OS=Mus musculus GN=Gtpbp1 PE=1 SV=2	39.477	1	0	8.23	72301	33	4	4	4	4	4	4	10.5982	13.1578	11.9704	14.1485	10.7898	10.8819	10.9778	11.9882	10.9533	12.0162	10.8811	14.7608	10.8596	11.0634	11.3406	-0.315888	0.799128	6.5	+		-0.0715748	0.846031	0			-1.3093	0.159433	5	+		-1.06499	0.369268	1.5	+
sp|Q8R080|GTSE1_MOUSE	Gtse1	G2 and S phase-expressed protein 1 OS=Mus musculus GN=Gtse1 PE=1 SV=2	53.255	1	0	6.48	78751	42	3	3	3	3	7	7	12.0315	8.68826	11.3216	10.6507	10.8176	10.8819	10.1675	11.9882	11.5453	10.785	11.223	10.2934	11.1521	11.0634	10.4687	0.288667	0.720221	6.5	+		-0.0690997	0.891507	0	+		0.290799	0.732598	3	+		-0.0669684	0.862868	3.5	+
sp|P10922|H10_MOUSE	H1f0	Histone H1.0 OS=Mus musculus GN=H1f0 PE=2 SV=4	58.299	1	0	9.79	20861	7	2	2	2	2	17	17	11.0691	9.77432	11.8914	10.6507	17.9321	12.2725	13.2072	11.9882	10.6321	12.8914	11.6726	10.2934	16.9731	13.5616	11.3406	0.525996	0.499709	4.33333	+		0.108431	0.961491	0	+		3.00363	0.0843383	2	+		2.58606	0.152956	2.33333	+
sp|P01899|HA11_MOUSE	H2-D1	H-2 class I histocompatibility antigen, D-B alpha chain OS=Mus musculus GN=H2-D1 PE=1 SV=2	101.202	1	8	18.23	40836	23	5	4	5	4	12	7	10.5982	15.5954	14.8119	10.6507	10.7898	15.7843	15.1151	11.9882	12.3624	13.1972	13.7673	10.2934	10.7831	13.0997	11.3406	-0.508966	0.751261	3	+		-1.67826	0.325818	0	+		0.505342	0.787882	1	+		-0.663948	0.563148	2	+
sp|P01901|HA1B_MOUSE	H2-K1	H-2 class I histocompatibility antigen, K-B alpha chain OS=Mus musculus GN=H2-K1 PE=1 SV=1	90.684	1	7	17.62	41302	21	4	3	4	3	10	5	11.5194	15.2617	11.3364	10.6507	10.7898	12.0166	10.9778	11.9882	10.3302	14.6298	11.2546	10.2934	11.8313	11.0634	11.3406	-0.56502	0.712212	1	+		-0.0313669	0.944448	0			-0.748894	0.517637	0	+		-0.215241	0.867699	1	+
sp|P01898|HA10_MOUSE	H2-Q10	H-2 class I histocompatibility antigen, Q10 alpha chain OS=Mus musculus GN=H2-Q10 PE=1 SV=3	42.27	1	3	8	37251	21	2	1	2	1	8	3	10.5982	9.61341	10.8052	10.6507	10.7898	10.8819	10.9778	11.9882	10.2267	10.785	10.3479	10.3576	10.8596	11.0634	11.3406	0.012432	0.968041	1.33333	+		-0.0715748	0.846031	0			0.742582	0.104978	1.33333	+		0.658575	0.0164807	0	+
sp|P0C0S6|H2AZ_MOUSE	H2afz	Histone H2A.Z OS=Mus musculus GN=H2afz PE=1 SV=2	166.503	2	0	53.91	13553	6	6	4	6	4	200	26	10.5982	10.5486	10.4455	10.6507	16.1328	15.6088	15.118	11.9882	13.9844	13.376	11.3892	10.2934	17.2299	14.9979	11.3406	1.70002	0.0953382	7	+		-0.189168	0.920834	5.5	+		4.15123	0.00431619	8	+	+	2.26204	0.254816	4.5	+
sp|P02301|H3C_MOUSE	H3f3c	Histone H3.3C OS=Mus musculus GN=H3f3c PE=3 SV=3	108.979	2	1	38.97	15315	6	4	1	4	1	98	11	10.5982	10.9566	10.4455	10.6507	13.8189	10.8819	10.9778	11.9882	13.4467	12.3114	10.5808	10.2934	10.8596	11.0634	11.3406	0.995361	0.233842	1	+		-0.828845	0.355775	0			1.25399	0.119062	0			-0.570216	0.549244	1	+
sp|Q9JKS5|HABP4_MOUSE	Habp4	Intracellular hyaluronan-binding protein 4 OS=Mus musculus GN=Habp4 PE=1 SV=2	95.999	1	0	17.27	45924	25	4	4	4	4	23	23	14.376	9.99847	13.1128	10.9385	11.2215	10.8819	10.9778	11.9882	13.7457	10.9103	13.3958	10.9159	10.8596	11.0634	11.3406	0.135489	0.917969	1	+		-0.179503	0.597612	0			-0.839037	0.446327	0	+		-1.15403	0.264749	1	+
sp|Q9D3B1|HACD2_MOUSE	Hacd2	Very-long-chain (3R)-3-hydroxyacyl-CoA dehydratase 2 OS=Mus musculus GN=Hacd2 PE=1 SV=1	12.669	1	0	4.72	28402	11	1	1	1	1	1	1	10.5982	8.51666	10.4455	10.6507	10.7898	10.8819	10.9778	11.9882	9.13483	10.0639	10.5808	10.2934	10.8596	11.0634	11.3406	-0.0345091	0.956122	1			-0.0715748	0.846031	0			1.10671	0.107232	0			1.06964	0.0400314	1
sp|Q61425|HCDH_MOUSE	Hadh	Hydroxyacyl-coenzyme A dehydrogenase, mitochondrial OS=Mus musculus GN=Hadh PE=1 SV=2	88.577	1	0	13.06	34464	19	2	2	2	2	7	7	10.5982	13.5923	10.4455	10.6507	10.7898	10.8819	10.9778	11.9882	9.13483	11.3355	10.5808	10.7833	10.8596	11.0634	11.3406	-0.863028	0.370433	15	+		-0.0715748	0.846031	0			-0.162194	0.8475	7.66667			0.629259	0.317797	7.33333	+
sp|Q8BMS1|ECHA_MOUSE	Hadha	Trifunctional enzyme subunit alpha, mitochondrial OS=Mus musculus GN=Hadha PE=1 SV=1	717.619	1	0	37.35	82670	42	20	20	21	21	118	118	12.7067	18.4582	10.7373	10.5645	13.5011	15.743	15.627	12.6524	13.7348	19.4742	12.0687	11.3687	14.4502	15.4389	13.7278	1.04493	0.702273	20.3333	+		0.1581	0.881072	1	+		1.2642	0.550809	9.83333	+		0.377379	0.871408	11.5	+
sp|Q99JY0|ECHB_MOUSE	Hadhb	Trifunctional enzyme subunit beta, mitochondrial OS=Mus musculus GN=Hadhb PE=1 SV=1	343.295	1	0	29.89	51386	28	12	12	13	13	46	46	11.9414	17.423	10.9983	10.6507	14.9526	14.6339	14.166	13.4301	12.8907	18.4424	12.3359	12.7949	13.9488	15.5125	12.6365	1.36264	0.548303	4	+		-0.263053	0.755034	0	+		1.54231	0.376312	3	+		-0.0833888	0.965759	1	+
sp|Q99KB8|GLO2_MOUSE	Hagh	Hydroxyacylglutathione hydrolase, mitochondrial OS=Mus musculus GN=Hagh PE=1 SV=2	10.062	1	0	5.18	34084	19	1	1	1	1	1	1	10.5982	11.1442	10.4455	10.6507	10.7898	10.8819	10.9778	11.9882	9.13483	10.9294	10.5808	10.2934	10.8596	11.0634	11.3406	-0.475009	0.298438	65.3333			-0.0715748	0.846031	0			0.449827	0.206042	24.6667			0.853261	0.132233	40.6667
sp|Q8BKT8|HAUS7_MOUSE	Haus7	HAUS augmin-like complex subunit 7 OS=Mus musculus GN=Haus7 PE=1 SV=2	33.575	1	0	3.85	40656	26	1	1	1	1	1	1	12.6109	9.99847	10.4455	10.6507	10.7898	10.8819	10.9778	11.9882	9.70724	10.785	10.5808	10.2934	10.8596	11.0634	11.3406	-0.584748	0.384492	2			-0.0715748	0.846031	0			0.233081	0.728839	2			0.746254	0.0557308	0
sp|Q99L00|HAUS8_MOUSE	Haus8	HAUS augmin-like complex subunit 8 OS=Mus musculus GN=Haus8 PE=1 SV=2	89.577	1	0	6.7	41653	18	2	2	2	2	11	11	13.4062	10.6872	10.4455	10.6507	10.7898	10.6317	10.9778	11.9882	13.6483	10.3083	10.5808	10.2934	10.8596	11.6834	11.3406	-0.0896485	0.936456	10.6667	+		0.197648	0.652415	0			-0.200456	0.802876	4.33333	+		0.0868399	0.933252	6.33333	+
sp|P01942|HBA_MOUSE	Hba	Hemoglobin subunit alpha OS=Mus musculus GN=Hba PE=1 SV=2	60.751	1	0	18.31	15085	8	2	2	2	2	7	7	11.5205	11.8347	14.1713	14.7003	11.8886	13.0315	14.7544	15.1384	13.1589	13.5193	15.6914	10.2934	13.1192	13.2866	10.2792	0.10904	0.939189	1	+		-1.47487	0.278461	0	+		0.646487	0.580502	1	+		-0.937419	0.570575	0	+
sp|P02088|HBB1_MOUSE	Hbb-b1	Hemoglobin subunit beta-1 OS=Mus musculus GN=Hbb-b1 PE=1 SV=2	90.657	1	2	15.65	15840	11	2	1	2	1	14	9	13.9047	12.7661	13.3719	13.14	14.011	13.4952	13.4293	11.9882	12.9288	13.0492	13.2482	10.6786	14.9776	14.1176	12.5735	-0.819479	0.253037	1	+		0.658624	0.4376	0	+		-0.0647047	0.900327	1	+		1.4134	0.186914	0	+
sp|P53702|CCHL_MOUSE	Hccs	Cytochrome c-type heme lyase OS=Mus musculus GN=Hccs PE=1 SV=2	74.843	1	0	17.65	30978	16	4	4	4	4	7	7	10.5982	14.718	11.8789	10.6507	11.1005	10.8819	10.9778	11.9882	9.13483	15.5274	10.5808	11.3101	10.8596	11.0634	11.3406	-0.323157	0.853664	0	+		-0.149235	0.663213	1			-0.724333	0.495402	0	+		-0.550411	0.749121	1	+
sp|P08103|HCK_MOUSE	Hck	Tyrosine-protein kinase HCK OS=Mus musculus GN=Hck PE=1 SV=4	18.671	1	10	3.44	59129	33	2	1	2	1	4	1	10.7489	11.7169	10.4339	11.183	10.7898	11.2969	10.9778	11.9882	10.2986	12.1873	10.847	11.7671	10.8596	10.8087	12.1344	0.25433	0.636755	2.33333	+		0.00439929	0.993017	0	+		0.242526	0.550088	1	+		-0.00740419	0.990994	1.33333	+
sp|O09106|HDAC1_MOUSE	Hdac1	Histone deacetylase 1 OS=Mus musculus GN=Hdac1 PE=1 SV=1	50.256	1	1	6.43	55075	25	2	2	2	2	4	4	11.2813	9.99847	10.4455	13.2037	12.6119	10.8819	10.9778	12.4889	10.2168	9.78777	10.5808	13.4173	13.0693	12.4049	12.7076	-0.231577	0.838087	9.33333	+		0.98711	0.148149	0	+		0.507911	0.571965	4	+		1.7266	0.140132	5.33333	+
sp|Q9Z2V5|HDAC6_MOUSE	Hdac6	Histone deacetylase 6 OS=Mus musculus GN=Hdac6 PE=1 SV=3	37.722	1	0	1.22	125787	42	1	1	1	1	6	6	11.1804	9.99847	10.4455	10.6507	10.7898	10.8819	10.9778	11.9882	8.8176	10.785	10.5808	10.5106	10.8596	11.0634	11.3406	-0.395265	0.473913	3	+		-0.0715748	0.846031	1			0.590688	0.162791	3			0.914378	0.158313	1	+
sp|Q8VDJ3|VIGLN_MOUSE	Hdlbp	Vigilin OS=Mus musculus GN=Hdlbp PE=1 SV=1	779.576	1	0	28.63	141743	80	29	29	29	29	205	205	19.3036	15.0481	15.1168	16.5828	17.3444	12.3038	11.626	11.9882	18.0389	14.7847	15.2473	18.3394	12.6394	12.4275	12.3799	0.0897547	0.949426	112.5	+		-0.83333	0.62446	6.5	+		-3.19724	0.105257	48.1667	+		-4.12033	0.013074	70.8333	+	+
sp|Q5PRF0|HTR5A_MOUSE	Heatr5a	HEAT repeat-containing protein 5A OS=Mus musculus GN=Heatr5a PE=1 SV=2	13.166	1	0	0.49	219893	112	1	1	1	1	2	2	10.3995	9.99847	10.4455	10.6507	10.7898	10.8819	10.9778	11.9882	9.13483	10.785	10.5808	10.2934	10.8596	11.0634	11.3406	-0.175017	0.671734	1			-0.0715748	0.846031	0			0.785915	0.0446054	0			0.889357	0.105937	1
sp|Q6P1G0|HEAT6_MOUSE	Heatr6	HEAT repeat-containing protein 6 OS=Mus musculus GN=Heatr6 PE=1 SV=1	18.061	1	0	1.44	128922	54	1	1	1	1	2	2	11.6523	9.99847	10.4455	10.6507	10.7898	10.8819	10.9778	11.9882	9.31519	10.785	10.5808	10.2934	10.8596	11.0634	11.3406	-0.443114	0.389276	13			-0.0715748	0.846031	0			0.472727	0.331088	6.5			0.844267	0.0899605	6.5
sp|Q9R257|HEBP1_MOUSE	Hebp1	Heme-binding protein 1 OS=Mus musculus GN=Hebp1 PE=1 SV=2	25.416	1	0	8.42	21067	13	1	1	1	1	3	3	11.6571	11.2067	14.0394	10.6507	10.7898	10.8819	10.9778	11.9882	9.87348	10.785	13.5732	13.7633	10.8596	11.0634	11.3406	0.11026	0.931685	9	+		-0.0715748	0.846031	0			-0.729024	0.395268	7.5	+		-0.910859	0.470868	1.5	+
sp|Q60848|HELLS_MOUSE	Hells	Lymphocyte-specific helicase OS=Mus musculus GN=Hells PE=1 SV=2	31.645	1	0	2.56	95126	51	2	2	2	2	5	5	15.0925	12.4878	10.4455	10.6507	10.7898	10.8819	10.9778	11.9882	12.3132	12.7858	10.5808	10.2934	10.8596	11.0634	11.3406	-0.675795	0.606247	27.8333	+		-0.0715748	0.846031	30.3333			-1.00966	0.399184	27.3333	+		-0.405441	0.60873	30.8333	+
sp|Q6DFV5|HELZ_MOUSE	Helz	Probable helicase with zinc finger domain OS=Mus musculus GN=Helz PE=1 SV=2	17.607	1	0	0.66	219880	97	1	1	1	1	1	1	10.5982	10.0191	12.6728	10.6507	10.7898	10.8819	10.9778	11.9882	10.9592	10.8902	11.3906	10.2934	10.8596	11.0634	11.3406	-0.101833	0.875482	6.5	+		-0.0715748	0.846031	0			0.174265	0.795764	2.5	+		0.204524	0.514018	4	+
sp|Q99L13|3HIDH_MOUSE	Hibadh	3-hydroxyisobutyrate dehydrogenase, mitochondrial OS=Mus musculus GN=Hibadh PE=1 SV=1	41.099	1	0	8.66	35440	15	2	2	2	2	3	3	10.5982	10.9561	10.4455	10.6507	10.7898	10.8819	10.9778	11.9882	9.13483	10.785	10.7407	10.3017	10.8596	10.8481	11.3406	-0.422061	0.330867	0	+		-0.143335	0.704521	2			0.496853	0.147358	1			0.775579	0.163167	1	+
sp|Q9JLZ6|HIC2_MOUSE	Hic2	Hypermethylated in cancer 2 protein OS=Mus musculus GN=Hic2 PE=2 SV=4	12.372	1	0	1.62	66766	30	1	1	1	1	1	1	10.5982	15.0526	14.522	12.3005	10.7898	10.8819	10.9778	11.9882	16.4336	10.785	14.5371	13.9635	10.8596	11.0634	11.3406	0.811461	0.621909	5	+		-0.0715748	0.846031	0			-1.95888	0.116077	2	+		-2.84192	0.0969489	3	+
sp|Q9JLR9|HIG1A_MOUSE	Higd1a	HIG1 domain family member 1A, mitochondrial OS=Mus musculus GN=Higd1a PE=1 SV=1	30.969	1	0	23.16	10425	4	1	1	1	1	4	4	10.5982	11.7405	10.4455	10.6507	10.7898	10.8819	10.9778	11.9882	9.13483	10.785	10.5808	10.2934	10.8596	11.0634	11.3406	-0.660192	0.212648	0			-0.0715748	0.846031	1.33333			0.30074	0.488392	0			0.889357	0.105937	1.33333
sp|Q8VD75|HIP1_MOUSE	Hip1	Huntingtin-interacting protein 1 OS=Mus musculus GN=Hip1 PE=1 SV=2	12.818	1	0	1.07	115202	69	1	1	1	1	2	2	12.0873	9.54276	10.4455	10.7107	10.7898	10.9993	10.9778	11.9882	9.21238	10.9721	10.5808	10.8044	10.8525	11.059	11.3406	-0.304136	0.662208	8	+		-0.104773	0.771264	0	+		0.492246	0.437612	4.66667	+		0.69161	0.216805	3.33333	+
sp|P15864|H12_MOUSE	Hist1h1c	Histone H1.2 OS=Mus musculus GN=Hist1h1c PE=1 SV=2	309.201	2	2	17.92	21267	11	7	2	7	2	228	52	11.5819	15.0308	15.9721	15.2879	14.7791	15.5461	16.4928	16.1996	16.3776	15.0114	16.1534	15.0705	19.4939	17.4259	14.7887	1.18507	0.300089	1.66667	+		1.48176	0.280484	0	+		1.28621	0.267925	0	+		1.58291	0.249356	1.66667	+
sp|P43274|H14_MOUSE	Hist1h1e	Histone H1.4 OS=Mus musculus GN=Hist1h1e PE=1 SV=2	277.957	1	2	17.35	21977	12	7	2	7	2	211	35	11.6506	14.5534	10.4455	14.645	13.9749	15.0675	15.9485	15.6476	14.7706	14.7858	12.172	14.473	18.5104	17.084	15.5209	1.22676	0.356514	51.3333	+		1.87882	0.087716	36.1667	+		2.33602	0.0864896	55.3333	+		2.98807	0.0346604	32.1667	+	+
sp|C0HKE1|H2A1B_MOUSE	Hist1h2ab	Histone H2A type 1-B OS=Mus musculus GN=Hist1h2ab PE=1 SV=1	179.527	14	0	57.69	14135	7	6	1	6	1	336	8	10.5982	9.99847	10.4455	10.6507	10.7898	13.5503	13.1232	11.9882	13.4688	10.785	11.1148	10.2934	12.9954	13.2141	11.3406	0.992298	0.217508	1	+		0.153821	0.868721	0	+		1.93969	0.0226283	0	+		1.10122	0.30765	1	+
sp|P70696|H2B1A_MOUSE	Hist1h2ba	Histone H2B type 1-A OS=Mus musculus GN=Hist1h2ba PE=1 SV=3	69.613	1	0	48.03	14237	11	6	1	6	1	135	1	10.5982	13.0835	10.4455	12.7011	10.7898	13.738	13.0254	13.2136	11.0716	10.785	12.5872	14.075	10.8596	11.0634	11.3406	0.422651	0.694617	14.6667	+		-1.60383	0.0948293	0	+		0.98465	0.339308	6.33333	+		-1.04183	0.302255	8.33333	+
sp|P10853|H2B1F_MOUSE	Hist1h2bf	Histone H2B type 1-F/J/L OS=Mus musculus GN=Hist1h2bf PE=1 SV=2	416.262	8	3	56.35	13936	11	8	3	11	6	434	300	18.0007	16.9302	16.005	17.7997	22.6727	19.1699	19.2001	16.8627	18.3937	17.3909	17.1046	17.1774	21.9667	18.5138	18.26	0.332797	0.56417	11.6667	+		0.103831	0.95459	0	+		2.29246	0.123933	6.66667	+		2.0635	0.109335	5	+
sp|P84228|H32_MOUSE	Hist1h3b	Histone H3.2 OS=Mus musculus GN=Hist1h3b PE=1 SV=2	225.804	1	1	38.97	15388	6	4	1	5	2	150	63	10.5982	13.7413	10.4455	11.6317	18.8796	13.9841	15.9049	11.9882	15.2968	10.785	10.5808	10.2934	17.396	14.2758	11.3406	0.134861	0.927015	38	+		-0.851725	0.7229	7	+		3.58504	0.0730599	16.3333	+		2.59845	0.256807	28.6667	+
sp|P62806|H4_MOUSE	Hist1h4a	Histone H4 OS=Mus musculus GN=Hist1h4a PE=1 SV=2	474.033	1	0	53.4	11367	6	10	10	13	13	847	847	18.3304	18.4043	17.7713	16.6374	23.8213	20.5183	21.6461	18.6334	20.4918	17.5192	19.7691	16.0584	23.0836	20.8293	18.1522	0.673761	0.562323	9.33333	+		-0.466399	0.800682	0	+		3.36892	0.027073	2	+		2.22876	0.246098	7.33333	+
sp|Q6PCN7|HLTF_MOUSE	Hltf	Helicase-like transcription factor OS=Mus musculus GN=Hltf PE=1 SV=1	43.791	1	0	4.99	113317	60	3	3	3	3	3	3	12.1576	11.1451	10.4455	10.6507	13.2277	12.0499	10.9778	11.9882	12.6327	12.1711	10.5808	12.5176	10.8596	11.0634	16.1615	0.875852	0.200848	26	+		0.633931	0.699437	0	+		0.961178	0.159086	9.33333	+		0.719257	0.663349	16.6667	+
sp|P22907|HEM3_MOUSE	Hmbs	Porphobilinogen deaminase OS=Mus musculus GN=Hmbs PE=1 SV=2	13.456	1	0	5.54	39344	21	1	1	1	1	1	1	10.5982	9.99847	10.4455	10.6507	10.7898	10.8819	10.9778	11.9882	9.60787	10.785	10.5808	10.2934	10.8596	11.0634	11.3406	-0.106419	0.731989	9.83333			-0.0715748	0.846031	0			0.736253	0.0585291	5			0.771097	0.064081	4.83333
sp|Q8R1M0|HMCES_MOUSE	Hmces	Embryonic stem cell-specific 5-hydroxymethylcytosine-binding protein OS=Mus musculus GN=Hmces PE=1 SV=1	11.889	1	0	2.27	40169	27	1	1	1	1	1	1	10.5982	15.8125	10.7085	18.6783	17.8732	14.8225	10.6956	16.2827	11.4886	16.3052	12.0217	14.1123	13.0699	12.3792	11.3406	-0.467434	0.84392	0	+		-2.65526	0.214705	1.66667	+		0.969115	0.713455	0	+		-1.21871	0.413112	1.66667	+
sp|P63158|HMGB1_MOUSE	Hmgb1	High mobility group protein B1 OS=Mus musculus GN=Hmgb1 PE=1 SV=2	19.504	1	0	6.98	24894	10	1	1	1	1	3	3	10.5982	13.127	13.1437	13.8611	10.7898	11.4274	10.9778	11.9882	9.13483	12.0324	13.1914	13.5555	10.8596	12.5514	11.3406	-0.703961	0.588251	2.33333	+		0.288047	0.607656	0			-1.38667	0.119298	0	+		-0.394656	0.766421	2.33333	+
sp|P30681|HMGB2_MOUSE	Hmgb2	High mobility group protein B2 OS=Mus musculus GN=Hmgb2 PE=1 SV=3	130.354	1	0	36.19	24162	11	5	5	5	5	23	23	10.9481	15.4257	14.9195	14.264	11.1507	12.478	10.9778	13.0104	11.7319	15.939	14.6706	15.285	10.8596	13.6477	16.4814	0.5173	0.718931	1	+		1.75869	0.288146	0	+		-1.98511	0.128135	0	+		-0.743717	0.687942	1	+
sp|Q00547|HMMR_MOUSE	Hmmr	Hyaluronan mediated motility receptor OS=Mus musculus GN=Hmmr PE=1 SV=4	79.644	1	0	6.05	91785	63	3	3	3	3	8	8	14.0279	13.7985	10.4455	10.6507	10.7898	10.8819	11.5598	11.9882	14.2411	12.9826	10.5808	10.2934	10.8596	11.0634	11.3406	-0.206154	0.884712	35	+		-0.217067	0.569771	0			-0.925703	0.396653	19	+		-0.936616	0.446565	16	+
sp|Q9CX86|ROA0_MOUSE	Hnrnpa0	Heterogeneous nuclear ribonucleoprotein A0 OS=Mus musculus GN=Hnrnpa0 PE=1 SV=1	110.778	1	0	16.39	30530	15	5	5	5	5	6	6	12.222	12.5325	12.7262	11.1054	14.9231	15.3322	16.4971	13.5376	13.5702	12.4029	12.4366	13.5228	16.4663	16.009	16.0347	0.836563	0.136643	3	+		1.09747	0.194664	2	+		2.92595	0.00621005	1	+		3.18686	0.000530362	4	+
sp|P49312|ROA1_MOUSE	Hnrnpa1	Heterogeneous nuclear ribonucleoprotein A1 OS=Mus musculus GN=Hnrnpa1 PE=1 SV=2	813.315	1	0	57.19	34196	19	21	19	25	23	341	337	16.0475	15.4732	15.5294	17.2477	18.9858	19.5346	19.9259	19.4663	16.0541	15.3853	16.1903	18.9437	18.8394	19.2822	20.4144	0.568904	0.545425	16	+		0.0338643	0.943417	2	+		3.40372	0.000293972	10.5	+	+	2.86868	0.0362532	7.5	+	+
sp|O88569|ROA2_MOUSE	Hnrnpa2b1	Heterogeneous nuclear ribonucleoproteins A2/B1 OS=Mus musculus GN=Hnrnpa2b1 PE=1 SV=2	1019.78	1	0	61.19	37403	20	26	26	30	30	884	884	17.754	17.3194	17.3335	17.234	20.3959	21.2521	21.0217	21.4578	17.3128	17.9978	17.9053	19.491	20.6865	20.6834	21.8083	0.766525	0.159971	42.8333	+		0.0275672	0.949602	316.833	+		3.62163	8.1251e-06	212.667	+	+	2.88268	0.00603851	147	+	+
sp|Q8BG05|ROA3_MOUSE	Hnrnpa3	Heterogeneous nuclear ribonucleoprotein A3 OS=Mus musculus GN=Hnrnpa3 PE=1 SV=1	921.46	1	0	48.55	39652	20	26	24	31	29	482	478	14.8301	15.9236	16.3886	17.3357	19.3932	20.6127	20.751	20.534	15.4616	15.8765	16.1626	18.5794	19.5663	20.0313	21.0325	0.400537	0.6627	72.6667	+		-0.112712	0.836313	10.5	+		4.20323	0.000451125	39.5	+	+	3.68998	0.00958058	43.6667	+	+
sp|Q99020|ROAA_MOUSE	Hnrnpab	Heterogeneous nuclear ribonucleoprotein A/B OS=Mus musculus GN=Hnrnpab PE=1 SV=1	362.428	1	0	32.63	30831	14	8	7	8	7	315	214	13.7297	16.2085	14.9023	17.5363	17.597	19.1248	19.4255	18.4255	15.7899	15.3351	16.3535	19.3439	17.0108	18.5432	18.8363	1.11138	0.397986	12.5	+		-0.513118	0.481583	2.5	+		3.04896	0.0159044	8	+	+	1.42446	0.277559	7	+
sp|Q9Z204|HNRPC_MOUSE	Hnrnpc	Heterogeneous nuclear ribonucleoproteins C1/C2 OS=Mus musculus GN=Hnrnpc PE=1 SV=1	93.204	1	0	10.86	34385	22	3	3	3	3	10	10	10.5982	14.0667	12.0342	11.6675	14.8736	15.8707	15.9389	15.8076	13.5885	13.7171	12.9522	15.2626	15.5613	16.1083	16.7976	1.78844	0.0871132	0	+		0.533027	0.261972	1	+		3.53104	0.00369249	0	+		2.27563	0.017535	1	+
sp|Q60668|HNRPD_MOUSE	Hnrnpd	Heterogeneous nuclear ribonucleoprotein D0 OS=Mus musculus GN=Hnrnpd PE=1 SV=2	256.431	1	0	32.39	38354	15	10	9	11	10	203	192	15.9822	15.4328	16.2326	17.0648	17.3889	18.6095	18.7269	17.8915	16.1749	16.2327	16.6532	17.8607	17.4335	18.9051	17.844	0.552267	0.327582	6	+		-0.0933367	0.865331	0	+		1.9761	0.00527806	4	+		1.3305	0.0741369	2	+
sp|Q9Z2X1|HNRPF_MOUSE	Hnrnpf	Heterogeneous nuclear ribonucleoprotein F OS=Mus musculus GN=Hnrnpf PE=1 SV=3	635.677	1	0	42.65	45730	23	12	10	16	14	312	223	14.5208	16.1698	19.2649	16.9424	17.6585	15.7224	16.1907	18.9932	17.5736	16.0764	19.136	18.5797	18.3694	16.6874	19.3266	1.11692	0.385213	0	+		0.98662	0.406888	8	+		0.416696	0.747144	3	+		0.286392	0.790817	5	+
sp|O35737|HNRH1_MOUSE	Hnrnph1	Heterogeneous nuclear ribonucleoprotein H OS=Mus musculus GN=Hnrnph1 PE=1 SV=3	535.278	1	0	41.2	49199	26	12	6	16	9	433	154	11.5852	15.8055	16.4943	16.0405	11.9368	16.0864	16.512	17.1281	15.8265	15.053	16.635	16.1846	16.8145	17.0693	17.2072	0.943359	0.45777	19	+		1.61447	0.300525	0	+		0.434449	0.800052	9.5	+		1.10556	0.0420089	9.5	+	+
sp|P70333|HNRH2_MOUSE	Hnrnph2	Heterogeneous nuclear ribonucleoprotein H2 OS=Mus musculus GN=Hnrnph2 PE=1 SV=1	521.563	1	0	32.29	49280	26	9	4	14	8	286	44	13.5866	13.5259	14.8582	11.4587	12.3911	13.2865	14.0141	15.5337	13.7772	11.6283	14.8587	14.2669	14.9963	15.2916	15.1853	0.275413	0.79124	15.3333	+		1.35138	0.1477	0	+		0.44901	0.659023	7.66667	+		1.52497	0.127673	7.66667	+
sp|P61979|HNRPK_MOUSE	Hnrnpk	Heterogeneous nuclear ribonucleoprotein K OS=Mus musculus GN=Hnrnpk PE=1 SV=1	814.382	1	0	54.43	50976	26	21	21	23	23	476	476	18.6235	17.3188	18.1911	17.8502	18.0586	18.6304	18.5085	19.1923	17.433	17.1238	18.5759	18.5293	19.334	18.3471	19.5504	-0.0803957	0.868156	73.5	+		0.479731	0.299915	8.83333	+		0.601565	0.146803	51.6667	+		1.16169	0.083926	30.6667	+
sp|Q8R081|HNRPL_MOUSE	Hnrnpl	Heterogeneous nuclear ribonucleoprotein L OS=Mus musculus GN=Hnrnpl PE=1 SV=2	1042.15	1	0	56.48	63964	22	21	21	29	29	329	329	15.9005	16.3412	15.4064	15.5307	18.8284	19.4658	20.6002	20.107	15.5987	16.491	15.3644	17.9799	19.2562	20.0012	19.5592	0.563831	0.404324	76.8333	+		-0.144794	0.779652	1	+		3.95566	0.000104324	39.5	+	+	3.24704	0.00648914	38.3333	+	+
sp|Q921F4|HNRLL_MOUSE	Hnrnpll	Heterogeneous nuclear ribonucleoprotein L-like OS=Mus musculus GN=Hnrnpll PE=1 SV=3	35.796	1	0	6.94	64125	30	3	3	3	3	4	4	13.2558	12.4465	12.3184	12.6188	10.79	10.9314	10.9778	12.2994	13.4014	12.259	12.5869	12.7767	10.8596	10.8882	11.2141	0.0961342	0.772442	19.1667	+		-0.262341	0.56621	0	+		-1.41027	0.0136642	7.5	+	+	-1.76874	0.00198869	11.6667	+	+
sp|Q9D0E1|HNRPM_MOUSE	Hnrnpm	Heterogeneous nuclear ribonucleoprotein M OS=Mus musculus GN=Hnrnpm PE=1 SV=3	1988.25	1	1	48.83	77649	55	33	33	63	63	427	427	17.7564	19.0374	18.0116	16.7306	17.0035	15.8386	16.5479	16.415	20.799	19.0729	17.2223	16.2159	18.2482	17.9042	17.4841	0.443517	0.705665	77.3333	+		1.42757	0.00837879	186.833	+	+	-1.43274	0.0356719	170	+	+	-0.448686	0.726872	94.1667	+
sp|Q8VEK3|HNRPU_MOUSE	Hnrnpu	Heterogeneous nuclear ribonucleoprotein U OS=Mus musculus GN=Hnrnpu PE=1 SV=1	1796.53	1	0	47.5	87918	47	46	46	64	64	1192	1192	18.0027	17.3105	17.6838	18.0528	24.491	23.0968	23.233	22.8433	17.583	18.0357	18.1203	18.7084	23.0085	22.9501	23.1085	0.349424	0.270309	10.5	+		-0.393691	0.408279	34.5	+		5.65358	8.46396e-06	35.3333	+	+	4.91047	1.03497e-05	9.66667	+	+
sp|Q8VDM6|HNRL1_MOUSE	Hnrnpul1	Heterogeneous nuclear ribonucleoprotein U-like protein 1 OS=Mus musculus GN=Hnrnpul1 PE=1 SV=1	632.578	1	0	27.94	96002	45	18	18	21	21	156	156	15.1075	18.6345	18.0424	16.4781	14.2734	18.0176	16.0355	15.0249	15.5743	18.5931	17.9474	16.7473	15.2643	16.882	16.7926	0.149907	0.889947	2	+		0.475127	0.671501	80.5	+		-1.22776	0.321421	60.8333	+		-0.902541	0.363769	21.6667	+
sp|Q00PI9|HNRL2_MOUSE	Hnrnpul2	Heterogeneous nuclear ribonucleoprotein U-like protein 2 OS=Mus musculus GN=Hnrnpul2 PE=1 SV=2	142.547	1	0	8.32	84940	41	7	7	8	8	21	21	14.4953	13.6223	12.6617	10.6507	15.966	16.13	15.8185	14.4467	13.2009	13.5256	12.8132	10.2934	15.8665	15.7556	13.1878	-0.399227	0.730495	19.8333	+		-0.653654	0.483023	3	+		2.73281	0.0240572	9	+	+	2.47838	0.0812977	13.8333	+
sp|Q8BUK6|HOOK3_MOUSE	Hook3	Protein Hook homolog 3 OS=Mus musculus GN=Hook3 PE=1 SV=2	87.413	1	0	4.18	83218	44	3	3	3	3	10	10	12.4528	9.76763	13.9812	10.6507	10.7898	10.8819	10.9778	11.9882	12.9809	10.785	13.1831	10.2934	10.8596	11.0634	11.3406	0.0975557	0.937728	76.6667	+		-0.0715748	0.846031	1			-0.553604	0.592827	19	+		-0.722734	0.451595	58.6667	+
sp|Q61646|HPT_MOUSE	Hp	Haptoglobin OS=Mus musculus GN=Hp PE=1 SV=1	263.107	1	0	33.72	38752	21	11	11	12	12	168	168	16.8268	16.1888	17.0193	18.6939	16.8152	18.0553	17.9203	17.1877	15.9232	16.5114	18.556	17.3406	18.3553	18.6111	17.811	-0.099395	0.902976	546.5	+		0.764516	0.115613	495	+		0.312441	0.62723	586.833	+		1.17635	0.155351	454.667	+
sp|Q91X72|HEMO_MOUSE	Hpx	Hemopexin OS=Mus musculus GN=Hpx PE=1 SV=2	503.207	1	0	41.52	51318	32	17	17	17	17	343	343	19.0358	18.367	19.6658	20.9348	17.3561	19.278	19.1134	19.0103	17.7901	19.1407	20.1676	19.8974	18.6165	19.2812	19.0003	-0.251918	0.752558	64.6667	+		0.276544	0.638774	0	+		-0.811413	0.294577	29.6667	+		-0.282951	0.681715	35	+
sp|O08756|HCD2_MOUSE	Hsd17b10	3-hydroxyacyl-CoA dehydrogenase type-2 OS=Mus musculus GN=Hsd17b10 PE=1 SV=4	248.408	1	0	38.31	27419	16	5	5	6	6	38	38	10.5982	15.5393	10.4455	10.6507	13.973	13.7372	14.6927	11.9882	9.13483	14.9626	10.5808	10.2934	13.2461	11.0634	11.3406	-0.565484	0.762033	48			-1.71442	0.1117	37.5	+		1.78938	0.239433	45.5	+		0.640441	0.70859	40
sp|O70503|DHB12_MOUSE	Hsd17b12	Very-long-chain 3-oxoacyl-CoA reductase OS=Mus musculus GN=Hsd17b12 PE=1 SV=1	112.611	1	0	12.82	34742	18	3	3	3	3	4	4	10.5982	14.567	10.4455	10.6507	10.7898	10.8819	10.9778	11.9882	9.13483	12.9932	10.5808	10.2934	10.8596	11.0634	11.3406	-0.814745	0.55041	5.5			-0.0715748	0.846031	0			-0.405871	0.709719	4.5			0.337299	0.741122	1
sp|P50171|DHB8_MOUSE	Hsd17b8	Estradiol 17-beta-dehydrogenase 8 OS=Mus musculus GN=Hsd17b8 PE=1 SV=2	12.762	1	0	5.02	26588	14	1	1	1	1	1	1	10.5982	9.99847	10.4455	10.6507	10.7898	13.4484	14.0381	11.9882	9.13483	11.3194	10.5808	10.2934	10.8596	12.2017	11.3406	-0.0910695	0.855002	8			-1.0988	0.288948	0	+		2.14292	0.0284862	6	+	+	1.13519	0.13118	2
sp|Q2TPA8|HSDL2_MOUSE	Hsdl2	Hydroxysteroid dehydrogenase-like protein 2 OS=Mus musculus GN=Hsdl2 PE=1 SV=1	49.724	1	0	2.04	54208	33	1	1	1	1	2	2	12.6653	11.6485	10.4455	10.6507	10.7898	10.8819	10.9778	11.9882	10.4188	13.433	10.7541	10.2934	11.3583	11.0634	11.3406	-0.127665	0.891957	1.33333	+		0.0946305	0.791635	0			-0.193035	0.75127	0	+		0.0292608	0.974821	1.33333	+
sp|P07901|HS90A_MOUSE	Hsp90aa1	Heat shock protein HSP 90-alpha OS=Mus musculus GN=Hsp90aa1 PE=1 SV=4	559.398	1	0	27.56	84788	38	19	9	20	10	209	99	16.1581	16.0321	16.018	15.8975	10.7898	13.871	12.5154	12.7991	16.3958	16.2492	17.2949	16.4573	12.1466	15.7792	13.6783	0.57293	0.0556218	36.6667	+		1.37422	0.289609	0	+		-3.53258	0.00149733	15.6667	+	+	-2.73129	0.0316803	21	+	+
sp|P11499|HS90B_MOUSE	Hsp90ab1	Heat shock protein HSP 90-beta OS=Mus musculus GN=Hsp90ab1 PE=1 SV=3	873.079	1	0	48.07	83281	38	28	17	31	20	341	195	18.9215	17.3329	18.3701	17.1321	12.6925	14.0056	13.3481	12.7982	18.9405	16.8112	18.2681	17.7799	13.823	15.4564	11.452	0.010792	0.986626	52.8333	+		0.366063	0.738211	8.33333	+		-4.72805	0.000100609	25.8333	+	+	-4.37278	0.0108747	35.3333	+	+
sp|P08113|ENPL_MOUSE	Hsp90b1	Endoplasmin OS=Mus musculus GN=Hsp90b1 PE=1 SV=2	179.526	1	0	9.35	92476	47	6	5	6	5	56	20	11.7722	13.9821	12.5829	13.1849	13.383	15.4412	15.0072	12.1275	10.9502	14.5983	15.3216	15.2289	11.2882	16.1948	12.4015	1.14425	0.353419	2	+		-0.694902	0.66985	0	+		1.10923	0.26124	1	+		-0.72993	0.693351	1	+
sp|P17156|HSP72_MOUSE	Hspa2	Heat shock-related 70 kDa protein 2 OS=Mus musculus GN=Hspa2 PE=1 SV=2	567.112	1	0	26.54	69642	40	15	3	15	3	573	8	12.0704	12.996	11.8036	12.3226	10.7898	10.8819	12.5032	11.9882	12.5244	13.6567	15.0453	13.6967	10.8596	14.1227	13.8232	1.43262	0.047191	2	+		1.39439	0.22336	36	+		-0.757361	0.174879	24.5	+		-0.79559	0.488116	13.5	+
sp|P48722|HS74L_MOUSE	Hspa4l	Heat shock 70 kDa protein 4L OS=Mus musculus GN=Hspa4l PE=1 SV=2	30.829	1	0	5.13	94382	61	3	3	3	3	4	4	14.8583	13.5409	16.0674	15.4652	14.4726	16.1783	17.4909	16.5785	11.6278	16.2029	17.2253	15.9069	16.0926	17.4845	15.1623	0.257766	0.854856	1	+		0.0663908	0.946256	0	+		1.19709	0.20001	1	+		1.00572	0.549678	0	+
sp|P20029|GRP78_MOUSE	Hspa5	78 kDa glucose-regulated protein OS=Mus musculus GN=Hspa5 PE=1 SV=3	1349.53	1	0	49.92	72422	38	33	31	39	37	860	674	15.9589	18.1275	18.5912	18.796	17.1434	19.8783	19.2566	18.9211	15.8086	18.6584	19.0998	19.1048	17.5905	20.0136	19.0692	0.299511	0.780323	10.6667	+		0.0912666	0.924091	11	+		0.931457	0.32898	9.83333	+		0.723212	0.543006	11.8333	+
sp|P63017|HSP7C_MOUSE	Hspa8	Heat shock cognate 71 kDa protein OS=Mus musculus GN=Hspa8 PE=1 SV=1	2305.6	1	0	80.65	70871	37	42	29	57	44	2034	1430	20.2317	20.9704	22.3363	24.4353	18.0989	20.4579	19.443	19.6758	20.973	20.041	22.3241	24.4453	18.2503	19.5703	19.9444	-0.0475973	0.972593	8.5	+		-0.163851	0.829541	41.1667	+		-2.57457	0.0489639	21.5	+	+	-2.69083	0.0767569	28.1667	+
sp|P38647|GRP75_MOUSE	Hspa9	Stress-70 protein, mitochondrial OS=Mus musculus GN=Hspa9 PE=1 SV=3	2314	1	0	68.04	73461	44	48	48	63	63	1378	1378	14.3584	18.8102	15.5647	17.4067	18.4003	20.8382	20.9944	19.6798	16.1533	19.1058	15.0738	17.47	18.6064	21.3784	19.5708	0.415721	0.762262	114.5	+		-0.12632	0.902928	891	+		3.44317	0.0244776	484.333	+	+	2.90113	0.0653407	521.167	+
sp|P14602|HSPB1_MOUSE	Hspb1	Heat shock protein beta-1 OS=Mus musculus GN=Hspb1 PE=1 SV=3	284.831	1	0	48.8	23014	14	9	9	9	9	61	61	15.9255	15.6094	16.7879	11.0952	10.7898	11.8067	11.1961	11.9882	19.1453	14.9814	15.8878	14.7842	15.3966	11.0634	11.7761	1.3452	0.440554	44.3333	+		1.30016	0.316677	22.5	+		-3.40927	0.0402198	34.5	+	+	-3.45431	0.0890716	32.3333	+
sp|Q9JK92|HSPB8_MOUSE	Hspb8	Heat shock protein beta-8 OS=Mus musculus GN=Hspb8 PE=1 SV=1	95.645	1	0	44.39	21533	12	6	6	6	6	25	25	10.3071	12.0265	17.5018	12.1683	11.3813	11.2771	10.9778	11.9882	15.6194	10.6677	16.5622	10.2934	10.8596	11.7522	11.3406	0.284764	0.903734	2.66667	+		-0.0886438	0.799499	0	+		-1.59482	0.349805	0	+		-1.96823	0.35775	2.66667	+
sp|P63038|CH60_MOUSE	Hspd1	60 kDa heat shock protein, mitochondrial OS=Mus musculus GN=Hspd1 PE=1 SV=1	1831.87	1	0	71.55	60955	36	40	40	49	49	379	379	15.5846	20.6522	14.071	13.301	15.0428	16.1827	15.3453	14.0367	17.0408	21.5134	15.3745	12.0577	14.5926	17.3591	14.6848	0.59439	0.824731	3	+		0.39365	0.687317	4.5	+		-0.750335	0.676385	3	+		-0.951075	0.71363	4.5	+
sp|Q64433|CH10_MOUSE	Hspe1	10 kDa heat shock protein, mitochondrial OS=Mus musculus GN=Hspe1 PE=1 SV=2	55.594	1	0	13.73	10963	10	1	1	1	1	5	5	10.5982	13.8095	10.4455	10.6507	10.7898	10.8819	10.9778	11.9882	11.0061	12.9762	10.5808	10.2934	10.8596	11.0634	11.3406	-0.16184	0.878319	4.5	+		-0.0715748	0.846031	0			-0.216508	0.809395	2			-0.126243	0.86871	2.5	+
sp|Q8BGC0|HTSF1_MOUSE	Htatsf1	HIV Tat-specific factor 1 homolog OS=Mus musculus GN=Htatsf1 PE=1 SV=1	12.515	1	0	1.32	86240	53	1	1	1	1	3	3	12.2088	11.9163	10.4455	10.6507	10.7898	11.0437	10.9778	11.9882	9.96618	12.035	10.2893	10.2934	10.8596	11.0634	11.3406	-0.659326	0.346485	27.1667	+		-0.112031	0.753821	0			-0.105401	0.845509	8.83333	+		0.441895	0.471338	18.3333	+
sp|P32304|5HT7R_MOUSE	Htr7	5-hydroxytryptamine receptor 7 OS=Mus musculus GN=Htr7 PE=2 SV=2	9.598	1	0	2.68	49916	17	1	1	1	1	1	1	10.5982	9.99847	10.4455	10.6507	10.7898	10.8819	10.9778	11.9882	9.13483	13.7836	10.5808	10.2934	13.5534	11.0634	11.3406	0.524981	0.620618	31			0.826357	0.31324	0			0.736253	0.0585291	16			1.03763	0.476769	15
sp|Q7TMY8|HUWE1_MOUSE	Huwe1	E3 ubiquitin-protein ligase HUWE1 OS=Mus musculus GN=Huwe1 PE=1 SV=5	20.711	1	0	0.43	482635	206	1	1	1	1	6	6	10.5304	9.99847	10.4455	10.6507	10.7898	10.8819	10.9778	11.9882	7.49929	10.785	10.5808	10.2934	10.8596	11.0634	11.3406	-0.616628	0.461007	1			-0.0715748	0.846031	0			0.753189	0.0528986	0			1.29824	0.216694	1
sp|P03975|IGEB_MOUSE	Iap	IgE-binding protein OS=Mus musculus GN=Iap PE=2 SV=1	97.861	1	0	9.16	62747	32	4	4	4	4	39	39	14.3615	14.6008	15.0636	15.22	16.2221	14.9489	13.9935	15.4338	13.1593	15.5713	14.6056	15.8311	15.767	16.7137	13.6898	-0.0196806	0.976344	3.33333	+		0.240561	0.80594	0	+		0.338106	0.529689	3.33333	+		0.598348	0.588062	0	+
sp|Q9DBD0|ICA_MOUSE	Ica	Inhibitor of carbonic anhydrase OS=Mus musculus GN=Ica PE=1 SV=1	55.38	1	0	3	76766	40	2	1	2	1	11	3	12.7715	9.96446	10.3463	11.5962	11.3616	11.5405	11.5122	12.6885	9.24263	11.0335	10.8166	10.6351	12.3718	12.0688	11.7294	-0.737651	0.366402	3	+		0.280939	0.508531	0	+		0.606121	0.424529	3	+		1.62471	0.0232719	0	+
sp|O88844|IDHC_MOUSE	Idh1	Isocitrate dehydrogenase [NADP] cytoplasmic OS=Mus musculus GN=Idh1 PE=1 SV=2	44.08	1	0	8.45	46674	31	3	3	3	3	9	9	15.1881	11.8085	12.2154	12.2526	10.7898	10.8819	10.9778	11.9882	12.8794	13.0685	12.3918	10.4544	10.8596	12.5638	11.3406	-0.667639	0.522592	1	+		0.428556	0.461521	0			-1.70671	0.0851548	0	+		-0.610511	0.492892	1	+
sp|P54071|IDHP_MOUSE	Idh2	Isocitrate dehydrogenase [NADP], mitochondrial OS=Mus musculus GN=Idh2 PE=1 SV=3	473.093	1	0	39.6	50906	32	13	13	14	14	88	88	10.5982	17.3816	11.5509	15.614	13.2525	14.1534	14.3765	15.8881	14.9848	16.8751	11.5047	14.9106	15.176	14.0407	13.6286	0.782612	0.704486	1.66667	+		-0.135866	0.864113	14	+		0.631459	0.724345	11.3333	+		-0.287019	0.843253	4.33333	+
sp|Q9D6R2|IDH3A_MOUSE	Idh3a	Isocitrate dehydrogenase [NAD] subunit alpha, mitochondrial OS=Mus musculus GN=Idh3a PE=1 SV=1	863.213	1	0	50.55	39639	22	18	18	25	25	94	94	16.1549	19.3961	11.4765	10.6507	13.6586	14.4701	15.2962	12.6706	14.3622	19.6893	15.1543	10.2934	14.2714	15.6761	13.2802	0.455267	0.876868	11.8333	+		0.385374	0.680685	0	+		-0.395667	0.858733	5	+		-0.46556	0.850874	6.83333	+
sp|P70404|IDHG1_MOUSE	Idh3g	Isocitrate dehydrogenase [NAD] subunit gamma 1, mitochondrial OS=Mus musculus GN=Idh3g PE=1 SV=1	62.786	1	0	9.16	42785	19	2	2	2	2	2	2	10.5982	11.8426	10.4455	10.6507	10.7898	10.8819	10.9778	11.9882	9.13483	11.0816	10.5808	10.2934	10.8596	11.0634	11.3406	-0.611556	0.287239	9			-0.0715748	0.846031	0			0.27523	0.54241	5			0.815211	0.165391	4
sp|P19182|IFRD1_MOUSE	Ifrd1	Interferon-related developmental regulator 1 OS=Mus musculus GN=Ifrd1 PE=1 SV=2	40.356	1	0	4.9	49935	21	1	1	1	1	10	10	12.4818	9.68352	10.0293	10.6507	10.7898	10.8819	10.9778	11.9882	9.99823	10.036	10.5808	10.0109	10.8596	11.0634	11.3406	-0.554828	0.41864	105.5	+		-0.0715748	0.846031	0			0.448134	0.535911	60	+		0.931387	0.00604911	45.5	+
sp|P18526|HVM55_MOUSE	IG	Ig heavy chain V region 345 OS=Mus musculus PE=1 SV=1	908.559	1	1	44.44	12902	8	8	3	17	9	3851	521	18.5002	18.3976	20.0129	23.1221	18.0834	21.5248	19.5771	17.9404	18.2156	19.4178	17.2509	22.0986	18.0659	18.9141	23.7302	-0.762486	0.634088	26	+		0.955313	0.613614	51.6667	+		-0.726796	0.617814	35	+		0.991003	0.629222	42.6667	+
sp|P01837|IGKC_MOUSE	IG	Ig kappa chain C region OS=Mus musculus PE=1 SV=1	873.404	1	0	100	11778	5	14	14	18	18	4295	4295	24.763	23.3878	24.947	25.546	25.116	25.4448	25.6391	24.1239	22.8014	23.6375	24.9105	24.6367	24.9219	25.8309	24.3965	-0.664457	0.355949	94	+		-0.0312293	0.955357	0	+		0.420003	0.486799	42	+		1.05323	0.177121	52	+
sp|P01864|GCAB_MOUSE	IG	Ig gamma-2A chain C region secreted form OS=Mus musculus PE=1 SV=1	555.713	1	0	36.42	36596	11	9	6	14	10	577	254	11.9128	13.0866	12.4583	12.6198	10.7898	14.4273	12.381	14.3572	11.4882	12.926	11.744	13.9325	10.8596	11.0634	12.7746	0.00331005	0.995876	16	+		-1.42293	0.271329	0	+		0.469444	0.622899	8.16667	+		-0.956801	0.305978	7.83333	+
sp|P01801|HVM32_MOUSE	IG	Ig heavy chain V-III region J606 OS=Mus musculus PE=1 SV=1	515.383	1	5	73.04	12810	6	9	2	12	2	663	67	13.4019	12.486	14.1354	12.7729	10.7898	15.1891	15.0767	12.6481	11.7211	10.8255	13.1463	11.9619	13.6098	15.2847	12.8026	-1.28534	0.0767157	120.833	+		0.473147	0.747633	1	+		0.226869	0.845884	60.5	+		1.98535	0.0629174	61.3333	+
sp|P06330|HVM51_MOUSE	IG	Ig heavy chain V region AC38 205.12 OS=Mus musculus PE=1 SV=1	484.141	1	1	56.78	12934	8	8	4	11	7	1380	884	18.4951	17.509	18.4489	19.4589	19.4566	19.8188	19.6189	18.7617	17.1562	17.2041	18.1083	18.8347	19.6984	19.994	19.2583	-0.652124	0.292542	4	+		0.236229	0.500352	51	+		0.936057	0.0878753	24.6667	+		1.82441	0.0156155	30.3333	+	+
sp|P01843|LAC1_MOUSE	IG	Ig lambda-1 chain C region OS=Mus musculus PE=1 SV=1	473.516	1	0	80.95	11575	5	5	5	7	7	963	963	19.4567	16.9132	17.9773	18.9244	19.1741	19.2595	19.1627	17.9736	17.3908	16.4789	17.8347	18.405	19.4164	19.3784	19.0602	-0.790531	0.296444	11.1667	+		0.392505	0.343637	0	+		0.574591	0.402523	6.83333	+		1.75763	0.0157747	4.33333	+	+
sp|P18527|HVM56_MOUSE	IG	Ig heavy chain V region 914 OS=Mus musculus PE=1 SV=1	451.776	1	1	65.98	10661	6	6	3	9	5	1919	76	15.7796	13.1691	14.2003	15.3634	12.0762	15.7231	15.8547	13.3611	14.6624	11.276	14.0896	14.9007	14.1305	16.0695	15.8146	-0.895948	0.415013	3.5	+		1.08441	0.41002	0	+		-0.374364	0.744525	1	+		1.606	0.208506	2.5	+
sp|P01638|KV5A6_MOUSE	IG	Ig kappa chain V-V region L6 (Fragment) OS=Mus musculus PE=4 SV=1	401.792	1	1	35.65	12986	5	4	4	7	7	393	393	19.7432	16.8884	18.1048	17.9851	19.3587	19.3115	19.0513	15.3847	17.4254	16.5783	17.6958	17.7849	19.5081	19.0274	16.8374	-0.809277	0.259267	28.5	+		0.181112	0.897319	0	+		0.0961572	0.935034	8	+		1.08655	0.21261	20.5	+
sp|P01756|HVM12_MOUSE	IG	Ig heavy chain V region MOPC 104E OS=Mus musculus PE=1 SV=1	385.444	2	1	54.7	12983	7	7	3	8	4	540	44	10.5982	11.9767	11.9785	12.6579	10.7898	14.1405	14.2871	11.9882	9.13483	11.1654	12.803	10.2934	10.8596	11.0634	11.3406	-0.953682	0.322847	2	+		-1.71352	0.152064	0	+		0.998564	0.336169	0	+		0.238722	0.805957	2	+
sp|P18528|HVM57_MOUSE	IG	Ig heavy chain V region 6.96 OS=Mus musculus PE=4 SV=1	383.36	1	1	72.45	11007	6	7	2	9	2	1919	88	10.5982	15.5157	17.2334	17.4169	10.7898	17.9429	18.0091	15.0868	16.5997	13.0903	16.2151	17.384	12.6355	17.772	17.8649	0.631214	0.74434	27.6667	+		0.633675	0.808163	0	+		0.266091	0.912664	11	+		0.268553	0.888811	16.6667	+
sp|P01798|HVM29_MOUSE	IG	Ig heavy chain V-III region E109 OS=Mus musculus PE=1 SV=1	377.818	1	0	51.33	12647	6	6	1	8	1	535	3	10.5982	9.99847	10.4455	10.6507	10.7898	10.8819	10.9778	11.9882	9.13483	10.785	10.5808	10.2934	11.4303	11.0634	11.3406	-0.224678	0.592191	0			0.118658	0.743257	17.3333			0.736253	0.0585291	9			1.07959	0.060006	8.33333
sp|P18525|HVM54_MOUSE	IG	Ig heavy chain V region 5-84 OS=Mus musculus PE=1 SV=1	364.373	1	1	58.12	12872	7	7	2	9	2	1977	146	15.1374	14.5467	15.6521	13.7716	10.7898	16.7537	16.5285	16.2661	15.0825	13.5637	15.0658	16.1532	16.018	17.1389	14.1568	0.189352	0.786435	23.6667	+		0.686714	0.725318	9	+		0.307578	0.84337	15.1667	+		0.80494	0.441017	17.5	+
sp|P01787|HVM18_MOUSE	IG	Ig heavy chain V regions TEPC 15/S107/HPCM1/HPCM2/HPCM3 OS=Mus musculus PE=1 SV=1	315.317	5	4	43.9	13777	7	7	5	7	5	367	125	15.6974	14.2309	15.4579	15.676	14.5719	16.476	16.432	16.6578	14.4968	13.3581	15.1662	15.0347	16.6467	16.7334	15.9577	-0.751596	0.213165	10.6667	+		0.41151	0.533081	0	+		0.768885	0.248455	6.33333	+		1.93199	0.0146646	4.33333	+	+
sp|P01643|KV5AA_MOUSE	IG	Ig kappa chain V-V region MOPC 173 OS=Mus musculus PE=1 SV=1	296.162	1	0	66.67	11819	5	4	2	5	2	455	65	16.5409	11.76	14.9326	14.8273	14.1239	16.1251	15.5973	13.7688	13.6397	11.2732	14.4789	15.5604	16.0446	11.0634	15.5874	-0.777132	0.586202	4.33333	+		-0.671973	0.670902	0	+		0.388563	0.746696	1.33333	+		0.493722	0.784602	3	+
sp|P01647|KV5AE_MOUSE	IG	Ig kappa chain V-V region HP 124E1 OS=Mus musculus PE=1 SV=1	288.635	1	1	61.11	11965	7	5	1	6	1	465	18	10.5982	9.99847	10.4455	10.6507	10.7898	10.8819	10.9778	11.9882	9.13483	10.785	10.5808	10.2934	10.8596	11.0634	11.3406	-0.224678	0.592191	8.83333			-0.0715748	0.846031	0			0.736253	0.0585291	4.33333			0.889357	0.105937	4.5
sp|P01806|HVM36_MOUSE	IG	Ig heavy chain V region 441 OS=Mus musculus PE=4 SV=1	277.646	3	2	74.14	12911	8	8	3	10	4	384	79	17.257	14.9852	16.7054	17.4387	13.2401	17.9204	17.5694	16.9282	15.3417	15.0644	15.9768	17.0809	15.9834	17.7113	17.3924	-0.730622	0.347169	29.3333	+		0.614509	0.668168	31	+		-0.18204	0.88575	30.3333	+		1.16309	0.153317	30	+
sp|P01631|KV2A7_MOUSE	IG	Ig kappa chain V-II region 26-10 OS=Mus musculus PE=1 SV=1	276.598	1	0	38.94	12273	6	4	4	5	5	438	438	21.3269	18.359	19.5102	20.0373	20.9267	20.5882	20.4967	19.4466	18.9325	17.98	19.0709	19.6629	21.3237	20.7896	20.1578	-0.896796	0.251908	20.5	+		0.392483	0.4433	10.5	+		0.556211	0.453222	19	+		1.84549	0.0140873	12	+	+
sp|P01810|HVM40_MOUSE	IG	Ig heavy chain V region J539 OS=Mus musculus PE=1 SV=1	235.657	1	0	46.22	13240	7	6	1	7	1	329	24	10.5982	9.99847	10.4455	10.6507	10.7898	10.8819	10.9778	11.9882	9.13483	10.785	10.5808	10.2934	10.8596	11.0634	11.3406	-0.224678	0.592191	17.5			-0.0715748	0.846031	3.5			0.736253	0.0585291	10.6667			0.889357	0.105937	10.3333
sp|P01783|HVM16_MOUSE	IG	Ig heavy chain V region MOPC 21 (Fragment) OS=Mus musculus PE=1 SV=1	230.347	1	1	21.32	15071	7	3	1	5	2	1840	51	15.6251	14.2335	15.6312	16.2254	10.7898	16.7803	16.9196	15.777	14.5439	11.4775	14.7801	15.7505	10.8596	16.2945	16.0707	-1.2908	0.251147	4	+		-0.658386	0.783222	0	+		-0.362134	0.818279	3	+		0.270279	0.889241	1	+
sp|P01671|KV3AJ_MOUSE	IG	Ig kappa chain V-III region PC 7175 OS=Mus musculus PE=1 SV=1	216.692	1	2	88.29	12010	6	5	1	6	1	236	3	11.549	12.2298	12.9363	10.6507	10.7898	14.5668	14.4076	11.9882	13.0393	11.3221	13.2944	10.2934	10.8596	14.546	11.3406	0.145861	0.87164	15.5	+		-0.689345	0.65748	0	+		1.09665	0.335724	8.5	+		0.261443	0.846827	7	+
sp|P01654|KV3A1_MOUSE	IG	Ig kappa chain V-III region PC 2880/PC 1229 OS=Mus musculus PE=1 SV=1	216.432	1	2	90.99	11980	6	5	2	6	3	345	7	13.9629	12.9185	14.1205	15.5684	16.61	16.2085	16.2251	12.8186	11.7775	11.7511	13.788	15.8365	15.1166	13.0312	15.4132	-0.854328	0.47309	1	+		-0.945252	0.474432	0	+		1.32299	0.250899	1	+		1.23207	0.390875	0	+
sp|P01646|KV5AD_MOUSE	IG	Ig kappa chain V-V region HP 123E6 OS=Mus musculus PE=1 SV=1	212.281	1	1	61.11	11989	7	5	1	6	2	276	57	10.9991	9.99847	10.4455	10.6507	10.7898	10.8819	10.9778	11.9882	9.13483	10.785	10.5808	10.2934	10.8596	11.0634	11.3406	-0.324905	0.472306	2			-0.0715748	0.846031	0			0.636026	0.117814	2			0.889357	0.105937	0
sp|P03987|IGHG3_MOUSE	IG	Ig gamma-3 chain C region OS=Mus musculus PE=1 SV=2	209.613	1	0	25.63	43929	18	7	7	7	7	54	54	17.4766	15.857	16.2229	14.5864	19.4613	16.6289	17.359	11.8146	16.034	13.7385	12.6492	13.4854	17.6461	15.3139	12.8918	-2.05895	0.070368	790.667	+		-1.03201	0.663031	582.333	+		0.2802	0.876086	724.333	+		1.30714	0.403452	648.667	+
sp|P01804|HVM35_MOUSE	IG	Ig heavy chain V-III region HPC76 (Fragment) OS=Mus musculus PE=4 SV=1	195.499	1	0	54.95	12304	7	6	1	7	1	206	117	17.354	13.2659	14.194	15.7783	16.8701	15.8999	15.6045	15.3969	13.8519	14.4639	14.415	14.9357	17.3035	16.0201	16.0428	-0.731437	0.460014	0	+		0.512633	0.372829	4.16667	+		0.794788	0.43805	1	+		2.03886	0.00573754	3.16667	+
sp|P01665|KV3AD_MOUSE	IG	Ig kappa chain V-III region PC 7043 OS=Mus musculus PE=1 SV=1	189.139	2	4	53.15	12002	5	3	2	4	3	308	159	15.0267	15.9413	17.6967	18.8524	18.267	19.0471	18.9356	17.8815	15.9101	14.0315	17.1276	18.5694	17.337	17.4682	19.2095	-0.469667	0.728213	6.5	+		-0.527903	0.42069	2	+		1.6535	0.116955	1.5	+		1.59527	0.256039	7	+
sp|P01803|HVM34_MOUSE	IG	Ig heavy chain V region AMPC1 OS=Mus musculus PE=1 SV=1	184.698	1	0	55.75	12691	6	6	1	7	1	96	7	10.5982	9.99847	10.4455	10.6507	10.7898	10.8819	10.9778	11.9882	9.13483	10.785	10.5808	10.2934	10.8596	11.0634	11.3406	-0.224678	0.592191	94.1667			-0.0715748	0.846031	62.5			0.736253	0.0585291	73.8333			0.889357	0.105937	82.8333
sp|P01630|KV2A6_MOUSE	IG	Ig kappa chain V-II region 7S34.1 OS=Mus musculus PE=1 SV=1	177.199	1	0	21.24	12496	7	2	2	3	3	282	282	17.6829	15.3407	16.3584	16.1724	17.6208	17.4009	17.3167	17.0493	15.4727	14.7359	16.1547	17.5512	17.8759	17.6264	17.5044	-0.409978	0.613815	1	+		0.321981	0.111836	0	+		0.95833	0.103215	1	+		1.69029	0.0643048	0	+
sp|P01634|KV5A2_MOUSE	IG	Ig kappa chain V-V region MOPC 21 OS=Mus musculus PE=1 SV=1	173.848	1	1	33.82	14902	8	4	2	7	5	312	270	13.99	13.5115	14.7233	13.9933	10.9952	14.6795	15.1639	11.9882	12.8279	13.6644	13.8565	11.6898	11.1525	12.7141	13.2701	-1.04489	0.107774	16	+		-0.82778	0.556202	0	+		-0.847814	0.448511	4	+		-0.630702	0.460179	12	+
sp|P03977|KV3A4_MOUSE	IG	Ig kappa chain V-III region 50S10.1 OS=Mus musculus PE=1 SV=1	171.928	1	0	68.47	12042	6	4	1	4	1	351	13	12.1208	9.99847	12.1766	14.7878	10.8514	10.8819	10.9778	14.1259	9.13483	11.7835	12.2205	14.3027	10.8596	15.4574	15.4681	-0.410547	0.785884	2	+		2.21913	0.22391	0	+		-0.561655	0.673578	2	+		2.06802	0.301664	0	+
sp|P01786|HVM17_MOUSE	IG	Ig heavy chain V region MOPC 47A OS=Mus musculus PE=1 SV=1	159.209	1	0	29.91	12975	7	4	1	4	1	300	35	14.5302	11.8275	13.8722	14.3429	16.5628	15.7373	15.7497	14.2153	12.318	11.1231	12.9041	15.4985	14.6983	11.8015	16.4623	-0.682265	0.562295	4.5	+		-1.24559	0.373825	0	+		1.92307	0.051063	1.5	+		1.35975	0.427883	3	+
sp|P01811|HVM41_MOUSE	IG	Ig heavy chain V region UPC10 OS=Mus musculus PE=1 SV=1	159.045	1	0	36.75	13001	6	4	2	4	2	95	9	10.5982	10.0558	10.4455	10.6507	10.7898	10.8819	10.9778	11.9882	9.13483	10.785	10.5808	10.2934	11.0561	11.0634	11.3406	-0.239008	0.564781	7			-0.00608648	0.986377	0			0.721924	0.0585215	3			0.954845	0.08374	4
sp|P01636|KV5A4_MOUSE	IG	Ig kappa chain V-V region MOPC 149 OS=Mus musculus PE=1 SV=1	134.945	1	0	35.19	12030	6	3	3	3	3	102	102	16.2852	15.9766	17.3775	19.5717	15.5826	18.3592	18.1622	18.7099	15.6286	15.5266	17.2023	18.1299	17.4795	18.4577	19.0982	-0.680897	0.533339	2	+		0.641645	0.522732	0	+		0.400735	0.724302	1	+		1.72328	0.0970719	1	+
sp|P01662|KV3AA_MOUSE	IG	Ig kappa chain V-III region ABPC 22/PC 9245 OS=Mus musculus PE=1 SV=1	130.775	2	1	53.15	12041	6	3	1	3	1	109	29	10.5982	14.3775	15.2625	16.199	10.7898	16.6803	16.5498	14.4743	14.6673	10.785	15.0346	15.9477	10.8596	15.4269	16.403	-0.000631063	0.999712	6.5	+		-0.393684	0.862846	1	+		0.51425	0.789583	2.5	+		0.121197	0.95322	5	+
sp|P04943|KV6A9_MOUSE	IG	Ig kappa chain V-VI region NQ6-8.3.1 OS=Mus musculus PE=2 SV=1	128.464	1	0	33.64	11572	5	4	2	7	2	54	29	19.537	15.944	16.7973	17.4698	19.7824	17.8943	17.6586	16.858	16.5447	17.0528	16.4789	13.6862	19.4973	17.9336	17.5976	-1.49637	0.215583	297.167	+		0.294512	0.751766	12	+		0.611285	0.557793	173.167	+		2.40217	0.0663468	136	+
sp|P84751|HVM63_MOUSE	IG	Ig heavy chain Mem5 (Fragment) OS=Mus musculus PE=1 SV=1	125.455	1	0	52.74	25350	7	6	1	6	1	246	2	10.5982	9.99847	10.4455	10.6507	14.541	10.8819	10.9778	11.9882	9.13483	10.785	10.5808	10.2934	10.8596	11.0634	11.3406	-0.224678	0.592191	41.5			-1.00936	0.36566	0			1.67404	0.101072	32			0.889357	0.105937	9.5
sp|P01750|HVM06_MOUSE	IG	Ig heavy chain V region 102 OS=Mus musculus PE=1 SV=1	125.074	1	2	41.88	12867	6	5	2	5	2	212	35	11.6104	14.3135	14.3891	14.4576	10.7898	15.9036	15.5151	14.471	13.5252	10.785	13.6583	14.2567	11.9126	14.7521	13.0886	-0.636326	0.563005	1	+		-0.918772	0.577423	0	+		0.477234	0.737239	1	+		0.194788	0.871674	0	+
sp|P01660|KV3A8_MOUSE	IG	Ig kappa chain V-III region PC 3741/TEPC 111 OS=Mus musculus PE=1 SV=1	124.635	1	0	48.65	12099	6	3	1	3	1	280	122	19.3392	15.7265	16.9497	17.5396	18.4269	18.2445	17.8532	16.4671	15.9566	16.0471	16.4824	12.6653	18.9267	18.1132	17.2688	-2.10086	0.119757	1	+		0.354988	0.613742	0	+		0.359206	0.694971	1	+		2.81506	0.0532265	0	+
sp|P01675|KV6A1_MOUSE	IG	Ig kappa chain V-VI region XRPC 44 OS=Mus musculus PE=1 SV=1	114.411	5	0	37.38	11627	5	3	2	3	2	56	27	10.5982	14.06	14.281	15.6381	12.6482	16.0947	14.768	13.9597	14.6486	11.1075	13.4741	15.4345	12.9378	15.0509	16.0887	0.0218749	0.988284	1	+		0.324786	0.789714	0	+		0.723335	0.596441	0	+		1.02625	0.484219	1	+
sp|P04942|KV6A8_MOUSE	IG	Ig kappa chain V-VI region NQ5-61.1.2 OS=Mus musculus PE=2 SV=1	114.299	1	0	33.64	11605	5	3	1	6	1	29	4	12.0034	11.9027	11.0198	12.2578	11.2502	10.3307	10.4814	11.9882	10.1647	11.9083	11.2345	13.012	11.1429	10.7788	11.3406	-0.216086	0.752749	17	+		0.0747935	0.880551	0	+		-0.78331	0.145031	8.5	+		-0.492431	0.524414	8.5	+
sp|P04945|KV6AB_MOUSE	IG	Ig kappa chain V-VI region NQ2-6.1 OS=Mus musculus PE=2 SV=1	111.378	1	0	38.89	11713	6	2	2	2	2	70	70	15.9846	14.3193	15.7455	17.0665	14.7226	16.9133	17.0118	16.6037	15.2037	12.7982	15.0391	16.9998	15.7521	15.239	17.4917	-0.768815	0.483471	289	+		-0.151917	0.865783	8.5	+		0.533885	0.51905	155.5	+		1.15078	0.369448	142	+
sp|P01635|KV5A3_MOUSE	IG	Ig kappa chain V-V region K2 (Fragment) OS=Mus musculus PE=1 SV=1	111.171	1	0	27.83	12581	7	3	3	3	3	411	411	19.0872	16.6727	18.0516	18.63	18.4107	19.2224	19.0909	18.2407	16.3003	16.9639	17.627	17.9624	19.2102	19.292	18.8803	-0.896971	0.210906	21	+		0.386337	0.264008	28.3333	+		0.630776	0.316967	27	+		1.91408	0.00794443	22.3333	+	+
sp|P01819|HVM43_MOUSE	IG	Ig heavy chain V region MOPC 141 OS=Mus musculus PE=4 SV=1	109.955	2	0	7.64	15759	6	1	1	2	2	918	918	16.7805	13.6992	14.891	15.3435	16.565	15.8176	15.9682	14.6323	13.4742	14.496	14.5166	14.6817	15.4385	16.0967	15.0482	-0.886445	0.2486	3.5	+		-0.217978	0.704672	4	+		0.56722	0.480576	5	+		1.23569	0.0308199	2.5	+
sp|P04940|KV6A6_MOUSE	IG	Ig kappa chain V-VI region NQ2-17.4.1 OS=Mus musculus PE=2 SV=1	109.542	3	0	33.64	11561	5	4	1	6	1	54	1	10.5982	9.99847	10.4455	10.6507	16.7639	10.8819	10.9778	11.9882	9.13483	10.785	10.5808	10.2934	10.8596	11.0634	11.3406	-0.224678	0.592191	1.5			-1.56509	0.387021	0			2.22976	0.162543	0			0.889357	0.105937	1.5
sp|P01657|KV3A5_MOUSE	IG	Ig kappa chain V-III region PC 2413 OS=Mus musculus PE=1 SV=1	103.291	1	1	52.25	11949	7	3	1	4	2	177	3	10.5982	9.99847	10.4455	10.6507	10.7898	10.8819	10.9778	11.9882	9.13483	10.785	10.5808	10.2934	10.8596	11.0634	11.3406	-0.224678	0.592191	3			-0.0715748	0.846031	0			0.736253	0.0585291	1.66667			0.889357	0.105937	1.33333
sp|P84750|KVM5_MOUSE	IG	Ig kappa chain V region Mem5 (Fragment) OS=Mus musculus PE=1 SV=1	92.585	1	0	30.58	13251	9	4	4	4	4	86	86	18.095	13.2016	15.351	10.6507	18.2405	15.4361	16.3191	11.9882	13.4592	12.3724	14.6153	9.65646	17.9327	16.1389	11.3406	-1.79873	0.381377	0	+		-0.358591	0.8801	1	+		1.1714	0.588887	1	+		2.61154	0.262732	0	+
sp|P01659|KV3A7_MOUSE	IG	Ig kappa chain V-III region TEPC 124 OS=Mus musculus PE=1 SV=1	91.791	1	1	25.89	12339	6	2	1	2	1	272	123	19.3392	15.7265	16.9497	17.5396	18.4269	18.2445	17.8532	16.4671	15.9566	16.0471	16.4824	12.6653	18.9267	18.1132	17.2688	-2.10086	0.119757	1	+		0.354988	0.613742	0	+		0.359206	0.694971	0	+		2.81506	0.0532265	1	+
sp|P01648|KV5AF_MOUSE	IG	Ig kappa chain V-V region HP 91A3 OS=Mus musculus PE=1 SV=1	89.372	1	2	41.67	11961	7	4	1	5	2	107	2	12.1088	14.5647	15.089	16.3282	10.7898	16.9061	16.6346	15.8365	14.4952	11.7706	15.0062	16.0834	12.1353	16.4263	16.5076	-0.183825	0.890112	3	+		-0.018698	0.993189	0	+		0.519099	0.768647	2	+		0.684225	0.691114	1	+
sp|P01726|LV1D_MOUSE	IG	Ig lambda-1 chain V region H2020 OS=Mus musculus PE=3 SV=1	79.002	1	5	32.56	13465	4	2	2	2	2	95	95	19.6912	16.1212	17.056	17.1295	15.8549	18.4026	18.1597	16.9967	17.1829	16.424	17.2047	16.6855	20.5914	18.4526	17.172	-0.625214	0.458576	8.83333	+		1.38523	0.257826	30.5	+		-0.145996	0.884634	20.1667	+		1.86445	0.0836405	19.1667	+
sp|P01878|IGHA_MOUSE	IG	Ig alpha chain C region OS=Mus musculus PE=1 SV=1	76.747	1	0	18.9	36876	12	3	3	3	3	11	11	13.8071	13.0134	13.8342	13.7199	12.9082	14.1962	15.071	12.9649	10.7184	11.5229	12.007	13.1578	11.7346	14.8404	12.4486	-1.74213	0.0188323	3	+		-0.777189	0.471835	0	+		0.191431	0.742724	2	+		1.15637	0.295804	1	+
sp|P06329|HVM50_MOUSE	IG	Ig heavy chain V region AC38 15.3 OS=Mus musculus PE=1 SV=1	68.854	1	1	15.83	13311	8	3	1	3	1	166	4	10.5982	9.99847	10.4455	10.6507	10.7898	10.8819	10.9778	11.9882	9.13483	10.785	10.5808	10.2934	10.8596	11.0634	11.3406	-0.224678	0.592191	4.5			-0.0715748	0.846031	0			0.736253	0.0585291	2			0.889357	0.105937	2.5
sp|P03976|KV2A5_MOUSE	IG	Ig kappa chain V-II region 17S29.1 OS=Mus musculus PE=1 SV=1	64.175	1	0	11.5	12390	5	1	1	1	1	127	127	15.6632	13.7976	14.9704	12.839	10.7898	16.0262	15.7889	15.0883	13.5739	13.0929	14.4052	14.6286	15.5977	16.0116	16.9832	-0.392428	0.605775	20.1667	+		1.77421	0.287877	0	+		0.105726	0.941319	8	+		2.27237	0.00879159	12.1667	+	+
sp|P01680|KV4A1_MOUSE	IG	Ig kappa chain V-IV region S107B OS=Mus musculus PE=4 SV=1	63.058	1	0	17.05	13833	5	2	2	2	2	121	121	19.2032	15.5748	16.652	17.379	19.1213	17.602	17.5442	16.4208	15.9952	16.1975	15.8868	16.9025	18.6082	17.8515	17.2986	-0.956778	0.274884	2	+		0.247368	0.748062	0	+		0.469777	0.636133	0	+		1.67392	0.010169	2	+
sp|P18532|HVM61_MOUSE	IG	Ig heavy chain V region 1B43 OS=Mus musculus PE=1 SV=1	58.9	1	0	22.41	13158	5	2	2	2	2	6	6	13.0575	12.2284	12.9447	15.6515	10.7898	15.2092	14.7906	11.9882	10.4415	11.528	11.7415	16.0177	12.5358	12.6474	17.2668	-1.03833	0.4978	4.33333	+		0.955546	0.622183	0	+		-0.276073	0.840053	2.33333	+		1.7178	0.419339	2	+
sp|P01674|KV3AM_MOUSE	IG	Ig kappa chain V-III region PC 2154 OS=Mus musculus PE=1 SV=1	52.606	1	0	11.11	11699	5	1	1	1	1	99	99	17.784	14.9832	16.4548	16.3826	15.7466	17.4967	17.2836	16.321	15.5909	15.3138	15.8244	15.7933	17.7416	17.602	16.2238	-0.770569	0.235097	5.66667	+		0.477199	0.484929	0	+		0.310793	0.674498	1	+		1.55856	0.0149412	4.66667	+	+
sp|P01755|HVM11_MOUSE	IG	Ig heavy chain V region S43 OS=Mus musculus PE=1 SV=1	35.508	1	0	27.74	15200	7	3	1	3	1	8	5	13.3121	11.1299	10.881	10.6463	13.6137	12.1014	11.8988	11.9882	10.3998	12.0357	11.2254	10.0544	12.7208	12.3559	11.3406	-0.563514	0.485154	2	+		-0.261409	0.67734	0	+		0.908168	0.26385	1	+		1.21027	0.111901	1	+
sp|P01741|HVM00_MOUSE	IG	Ig heavy chain V region OS=Mus musculus PE=1 SV=1	31.731	1	0	11.4	12555	7	1	1	1	1	25	25	13.4103	12.5064	13.7763	14.4385	10.7898	14.3437	15.2689	14.1286	12.3692	11.6134	13.0024	14.1928	14.6095	15.2371	13.7102	-0.738398	0.318168	4	+		0.886121	0.499095	0	+		0.0999134	0.927908	1	+		1.72443	0.0684044	3	+
sp|P18530|HVM59_MOUSE	IG	Ig heavy chain V region 7-39 OS=Mus musculus PE=4 SV=1	19.396	1	0	23.08	12972	7	3	1	3	1	27	2	11.8449	13.3735	14.1607	13.1988	10.7898	15.3027	15.1607	12.4141	10.4674	13.4414	14.5915	12.3912	11.3048	12.0715	13.5911	-0.421597	0.687793	11.5	+		-1.09437	0.474855	0	+		0.272363	0.82799	8.5	+		-0.400407	0.747933	3	+
sp|Q61249|IGBP1_MOUSE	Igbp1	Immunoglobulin-binding protein 1 OS=Mus musculus GN=Igbp1 PE=1 SV=1	18.678	1	0	5.29	38971	22	1	1	1	1	4	4	9.98741	8.78281	10.2184	10.6507	10.7898	10.8819	10.9778	11.9882	7.1603	10.785	10.0699	10.2934	10.8596	11.0634	11.3406	-0.332654	0.727746	18.1667	+		-0.0715748	0.846031	0			1.24964	0.0427632	5.16667	+	+	1.51072	0.1825	13	+
sp|Q07113|MPRI_MOUSE	Igf2r	Cation-independent mannose-6-phosphate receptor OS=Mus musculus GN=Igf2r PE=1 SV=1	555.136	1	0	9.71	273815	134	21	21	21	21	55	55	13.2125	17.1587	10.4455	10.8223	11.4508	11.1748	12.7509	12.8609	11.7689	16.7126	11.7949	12.115	10.8596	12.2771	12.4154	0.188093	0.926651	33.3333	+		-0.208654	0.765348	0	+		-0.850389	0.614895	13	+		-1.24714	0.440177	20.3333	+
sp|P01867|IGG2B_MOUSE	Igh-3	Ig gamma-2B chain C region OS=Mus musculus GN=Igh-3 PE=1 SV=3	780.137	1	0	46.29	44259	14	15	15	18	18	678	678	23.4585	16.8733	17.8331	16.6796	22.7007	17.8883	18.5005	16.7755	21.5469	15.0246	15.4194	16.7498	23.3253	16.9902	16.9649	-1.52595	0.512933	18.8333	+		0.127202	0.958777	2	+		0.25513	0.905492	7.33333	+		1.90828	0.480854	13.5	+
sp|P01758|HVM14_MOUSE	Igh-VJ558	Ig heavy chain V region 108A OS=Mus musculus GN=Igh-VJ558 PE=4 SV=1	69.465	1	0	12.82	12972	3	1	1	2	2	8	8	10.5982	11.8386	13.0262	14.32	14.8304	16.4439	16.1178	13.7323	14.3453	11.6637	13.3922	16.0151	12.4035	12.8871	16.6914	1.40833	0.288462	5.16667	+		-1.28713	0.385047	42.8333	+		2.83537	0.0310734	30	+	+	0.139909	0.932172	18	+
sp|P01863|GCAA_MOUSE	Ighg	Ig gamma-2A chain C region, A allele OS=Mus musculus GN=Ighg PE=1 SV=1	951.811	2	0	86.36	36389	11	17	11	25	18	2285	1742	21.6092	18.1384	20.4631	21.5735	21.817	21.7602	21.2804	21.2124	20.3099	18.0368	19.8936	21.5119	20.2238	21.4444	21.6887	-0.508024	0.656762	24.1667	+		-0.398545	0.388798	2	+		1.07147	0.24374	16	+		1.18095	0.261451	10.1667	+
sp|P01868|IGHG1_MOUSE	Ighg1	Ig gamma-1 chain C region secreted form OS=Mus musculus GN=Ighg1 PE=1 SV=1	1261.98	2	0	80.25	35705	14	26	26	34	34	6698	6698	26.1341	25.9699	26.9374	28.1563	26.3976	27.6446	27.5239	27.5216	24.8311	25.6774	26.8521	27.4156	26.7638	27.6428	28.1003	-0.60539	0.459419	26.1667	+		0.230417	0.649593	27.1667	+		0.472488	0.445509	31.3333	+		1.3083	0.146498	22	+
sp|P01872|IGHM_MOUSE	Ighm	Ig mu chain C region OS=Mus musculus GN=Ighm PE=1 SV=2	1079.02	1	0	61.23	49972	27	24	24	28	28	954	954	21.1229	20.0934	21.2989	21.6029	22.1509	22.817	22.8316	22.2439	20.0216	19.944	21.1731	21.583	22.4634	22.8814	22.4808	-0.349107	0.531542	78	+		0.0977075	0.705106	0	+		1.48129	0.00750044	42.5	+	+	1.92811	0.0119552	35.5	+	+
sp|P01749|HVM05_MOUSE	Ighv1-61	Ig heavy chain V region 3 OS=Mus musculus GN=Ighv1-61 PE=1 SV=1	299.295	1	1	41.03	13016	5	4	3	5	4	214	62	15.2171	13.9496	15.3205	16.6879	14.8998	16.3517	16.408	11.9882	13.0112	11.9754	15.1943	16.0652	14.5061	14.7234	16.6616	-1.23225	0.305286	1.5	+		0.385105	0.787242	0	+		-0.381828	0.756587	1.5	+		1.23553	0.371209	0	+
sp|P01751|HVM07_MOUSE	Ighv1-72	Ig heavy chain V region B1-8/186-2 OS=Mus musculus GN=Ighv1-72 PE=1 SV=1	220.276	2	4	48.92	15419	7	7	2	8	3	185	13	9.83711	9.99847	10.4455	10.6507	10.7898	10.8819	10.9778	11.9882	9.13483	11.5535	10.5808	10.2934	10.8596	11.0634	11.3406	0.157721	0.777182	12			-0.0715748	0.846031	0			0.926523	0.0334101	3.5			0.697227	0.298067	8.5
sp|P18531|HVM60_MOUSE	Ighv3-6	Ig heavy chain V region 3-6 OS=Mus musculus GN=Ighv3-6 PE=1 SV=1	171.611	1	0	22.41	13095	6	4	4	4	4	185	185	15.0004	14.1976	15.3561	16.9838	13.7314	16.6792	16.0306	15.1654	14.1744	14.103	14.3115	16.6628	14.7816	16.1729	17.8106	-0.571554	0.527036	10	+		0.853363	0.453797	0	+		0.0171822	0.984804	6.5	+		1.4421	0.222307	3.5	+
sp|P01633|KV5A1_MOUSE	Igk-V19-17	Ig kappa chain V19-17 OS=Mus musculus GN=Igk-V19-17 PE=1 SV=1	144.062	1	0	30.87	16434	7	4	3	5	4	451	434	20.2195	17.7396	18.7297	19.2798	19.9331	19.7755	19.901	18.3867	17.7859	17.5814	18.1981	18.5663	19.6163	19.7173	19.12	-0.959222	0.139301	32.6667	+		-0.0145257	0.976383	7	+		0.506934	0.457394	25	+		1.45163	0.0048463	14.6667	+	+
sp|P01844|LAC2_MOUSE	Iglc2	Ig lambda-2 chain C region OS=Mus musculus GN=Iglc2 PE=1 SV=1	189.783	1	1	78.85	11255	6	5	5	5	5	59	59	14.7063	12.842	14.3407	16.0969	12.4417	15.6184	15.6925	15.3112	11.3195	13.0282	14.9265	15.3115	15.9179	16.1212	16.4019	-0.850057	0.483776	11.5	+		1.38102	0.197407	0	+		0.269489	0.801748	5.5	+		2.50057	0.0716953	6	+
sp|Q6ZQA6|IGSF3_MOUSE	Igsf3	Immunoglobulin superfamily member 3 OS=Mus musculus GN=Igsf3 PE=1 SV=2	65.787	1	0	2.85	134710	67	3	3	3	3	4	4	13.4301	14.5122	12.5308	10.6507	10.7898	10.8819	11.2415	11.9882	14.5068	14.621	12.3026	10.2934	11.7336	11.9587	11.3406	0.149985	0.912829	3	+		0.452311	0.25967	0	+		-1.55561	0.121046	0	+		-1.25328	0.353599	3	+
sp|Q9DBZ1|IKIP_MOUSE	Ikbip	Inhibitor of nuclear factor kappa-B kinase-interacting protein OS=Mus musculus GN=Ikbip PE=1 SV=2	75.551	1	0	6.43	42532	26	2	2	2	2	8	8	10.5982	13.3959	11.8236	10.6507	10.7898	10.8819	12.0453	11.9882	9.13483	13.357	12.4847	10.2934	10.8596	11.6992	15.7679	-0.299577	0.806963	1	+		1.34928	0.357205	0	+		-0.190777	0.805287	0	+		1.45808	0.433239	1	+
sp|Q7TT37|ELP1_MOUSE	Ikbkap	Elongator complex protein 1 OS=Mus musculus GN=Ikbkap PE=1 SV=2	91.565	1	0	3.45	149584	64	3	3	3	3	20	20	14.565	10.3338	10.4455	11.4026	13.4069	10.8819	10.9778	13.2085	11.2442	10.7118	10.5808	10.2934	14.1175	11.0634	11.3406	-0.979156	0.369223	3	+		0.0550583	0.963744	0	+		0.432057	0.732137	1	+		1.46627	0.144807	2	+
sp|Q9CXY6|ILF2_MOUSE	Ilf2	Interleukin enhancer-binding factor 2 OS=Mus musculus GN=Ilf2 PE=1 SV=1	228.437	1	0	31.28	43062	21	7	7	7	7	59	59	10.5982	15.0228	15.2803	15.4476	12.4533	16.5969	17.7498	16.6524	15.0609	12.173	15.4618	16.4332	16.0162	16.8465	15.7268	0.695008	0.655889	1	+		0.333424	0.822361	2	+		1.77585	0.32317	1	+		1.41427	0.262306	2	+
sp|Q9Z1X4|ILF3_MOUSE	Ilf3	Interleukin enhancer-binding factor 3 OS=Mus musculus GN=Ilf3 PE=1 SV=2	282.783	1	1	15.03	96021	42	12	12	14	14	52	52	11.4551	13.4186	13.9338	15.1171	16.2856	15.7303	16.5459	16.3286	13.5965	13.5907	13.356	16.4972	16.9147	17.4773	15.2705	0.778926	0.49347	6	+		0.331527	0.598935	0	+		2.74149	0.0127882	3	+		2.29409	0.0793313	3	+
sp|O55222|ILK_MOUSE	Ilk	Integrin-linked protein kinase OS=Mus musculus GN=Ilk PE=1 SV=2	177.094	1	0	18.36	51373	28	8	8	9	9	39	39	15.7575	13.7542	10.4455	10.6507	10.39	10.8819	10.9778	12.4393	15.2598	12.7216	10.5808	11.0223	10.8596	11.0634	11.3406	-0.255853	0.882835	17	+		-0.0844056	0.880876	3	+		-1.47968	0.317128	7	+		-1.30824	0.346687	13	+
sp|Q8CAQ8|MIC60_MOUSE	Immt	MICOS complex subunit Mic60 OS=Mus musculus GN=Immt PE=1 SV=1	676.679	1	0	37.52	83900	54	24	24	24	24	98	98	13.6687	17.7083	14.5621	12.4123	14.6848	16.1397	16.2081	15.5607	14.3868	18.8368	15.7084	14.7322	11.6777	16.0106	15.8303	1.32819	0.415059	24.8333	+		-1.14212	0.404647	4.5	+		1.06047	0.404716	11.3333	+		-1.40984	0.440853	18	+
sp|Q0GNC1|INF2_MOUSE	Inf2	Inverted formin-2 OS=Mus musculus GN=Inf2 PE=1 SV=1	30.872	1	0	1.81	138560	50	1	1	1	1	3	3	12.0989	9.99847	10.4455	10.6507	10.7898	10.8819	10.9778	11.9882	9.56222	10.785	10.5808	10.2934	10.8596	11.0634	11.3406	-0.493012	0.385845	2.66667			-0.0715748	0.846031	0			0.361071	0.5235	0			0.782509	0.0680289	2.66667
sp|Q6P549|SHIP2_MOUSE	Inppl1	Phosphatidylinositol 3,4,5-trisphosphate 5-phosphatase 2 OS=Mus musculus GN=Inppl1 PE=1 SV=1	247.767	1	1	8.75	138973	81	10	10	11	11	68	68	17.344	15.4021	15.6736	14.8661	11.2067	16.7334	15.3775	15.5415	15.2966	15.5048	15.724	15.4154	11.8206	14.1541	15.8614	-0.336257	0.557881	4	+		-0.769432	0.675556	0	+		-1.10669	0.434182	0	+		-1.53986	0.178982	4	+
sp|Q8BKC5|IPO5_MOUSE	Ipo5	Importin-5 OS=Mus musculus GN=Ipo5 PE=1 SV=3	13.597	1	0	1.55	123591	57	1	1	1	1	3	3	11.541	9.99847	10.4455	11.6684	10.7898	10.8819	10.9778	13.1448	11.3767	10.785	10.5808	11.381	10.8596	11.0634	13.2621	0.117551	0.806313	0	+		0.279763	0.775505	4			0.535271	0.473236	2	+		0.697483	0.357043	2	+
sp|Q9JKF1|IQGA1_MOUSE	Iqgap1	Ras GTPase-activating-like protein IQGAP1 OS=Mus musculus GN=Iqgap1 PE=1 SV=2	28.649	1	0	0.66	188742	95	1	1	1	1	6	6	12.2654	12.0328	10.0117	10.6507	10.7898	10.8819	10.9778	11.9882	10.928	13.4359	10.5808	10.4351	10.8596	11.0634	11.3406	0.104817	0.910038	1	+		-0.0715748	0.846031	0			-0.0807061	0.899118	1	+		-0.257098	0.772361	0	+
sp|Q8R0S2|IQEC1_MOUSE	Iqsec1	IQ motif and SEC7 domain-containing protein 1 OS=Mus musculus GN=Iqsec1 PE=1 SV=2	14.919	1	0	1.87	108015	60	1	1	1	1	1	1	10.5982	9.99847	13.1429	10.6507	10.7898	10.8819	10.9778	11.9882	10.5098	10.785	14.2187	10.2934	10.8596	11.0634	11.3406	0.354168	0.770597	0	+		-0.0715748	0.846031	2			0.0618874	0.937032	2			-0.363856	0.755068	0	+
sp|Q8R3Y8|I2BP1_MOUSE	Irf2bp1	Interferon regulatory factor 2-binding protein 1 OS=Mus musculus GN=Irf2bp1 PE=1 SV=2	206.93	1	0	15.07	61751	38	6	6	6	6	21	21	12.851	11.2213	9.93203	10.6507	10.7898	10.8819	10.9778	13.5359	15.5011	10.7041	10.5808	14.7967	10.8596	11.0634	15.6969	1.73191	0.277073	55.3333	+		0.993603	0.546639	0			0.382617	0.688627	19.6667	+		-0.35569	0.868173	35.6667	+
sp|E9Q1P8|I2BP2_MOUSE	Irf2bp2	Interferon regulatory factor 2-binding protein 2 OS=Mus musculus GN=Irf2bp2 PE=1 SV=1	318.954	1	0	26.49	59292	33	9	7	9	7	28	23	13.4447	11.5969	13.7178	10.6507	10.7898	13.5308	13.7972	13.0916	15.9927	12.5211	13.6477	10.2934	10.8596	14.5601	13.1281	0.761214	0.605349	11	+		0.0469202	0.970648	0	+		0.449828	0.670885	3	+		-0.264467	0.880212	8	+
sp|Q8K3X4|I2BPL_MOUSE	Irf2bpl	Interferon regulatory factor 2-binding protein-like OS=Mus musculus GN=Irf2bpl PE=1 SV=1	148.434	1	0	9.29	80565	39	4	2	4	2	12	7	12.1657	9.99847	10.4455	10.6507	10.7898	10.8819	10.9778	11.9882	10.8005	10.785	10.5808	10.2934	10.8596	11.0634	11.3406	-0.200119	0.694213	4			-0.0715748	0.846031	0			0.344387	0.552034	1			0.472931	0.0484759	3
sp|Q8VIM9|IRGQ_MOUSE	Irgq	Immunity-related GTPase family Q protein OS=Mus musculus GN=Irgq PE=1 SV=1	35.88	1	0	2.06	59323	24	1	1	1	1	3	3	12.1281	9.99847	10.4455	10.6507	11.9091	11.8691	10.9778	12.6075	9.65677	10.785	10.5808	10.2934	10.8596	14.1117	11.3406	-0.476675	0.396965	0			0.263088	0.789783	6.5	+		1.03521	0.118999	2.5	+		1.77497	0.104545	4
sp|Q9CX00|IST1_MOUSE	Ist1	IST1 homolog OS=Mus musculus GN=Ist1 PE=1 SV=1	48.758	1	0	7.73	39468	14	2	2	2	2	2	2	11.4816	9.99847	11.5129	13.5148	10.7898	10.8819	10.9778	11.9882	10.3986	11.3296	11.8751	13.469	10.8596	10.8344	11.3406	0.141127	0.888752	3.5	+		-0.14791	0.696315	0			-0.467485	0.567828	2	+		-0.756522	0.373256	1.5	+
sp|Q3V3R4|ITA1_MOUSE	Itga1	Integrin alpha-1 OS=Mus musculus GN=Itga1 PE=1 SV=2	146.986	1	0	4.75	130810	59	5	5	5	5	12	12	13.6322	15.0374	10.3993	11.7631	10.7898	10.8819	10.9532	11.9882	9.64261	14.8639	10.675	13.6954	10.8596	12.5329	11.3406	-0.488743	0.770262	1	+		0.424437	0.46128	0			-1.5547	0.192297	0	+		-0.641523	0.689624	1	+
sp|Q62470|ITA3_MOUSE	Itga3	Integrin alpha-3 OS=Mus musculus GN=Itga3 PE=1 SV=1	144.98	1	0	11.59	116745	42	7	7	7	7	14	14	10.5982	16.0468	10.4455	10.6507	10.7898	11.549	11.5168	11.9882	9.59336	13.0979	10.5808	10.2934	10.8596	11.5009	11.3406	-1.04391	0.530759	106.833	+		-0.227252	0.527681	0	+		-0.474322	0.745167	36.8333	+		0.342334	0.724623	70	+
sp|P11688|ITA5_MOUSE	Itga5	Integrin alpha-5 OS=Mus musculus GN=Itga5 PE=1 SV=3	11.834	1	0	1.04	115043	44	1	1	1	1	7	7	10.5982	10.8212	10.4455	10.6507	10.7898	10.8819	10.9778	11.9882	9.13483	12.1963	10.5808	10.2934	10.8596	11.0634	11.3406	-0.0775429	0.906921	1			-0.0715748	0.846031	0			0.530562	0.116529	0			0.53653	0.509502	1
sp|Q61738|ITA7_MOUSE	Itga7	Integrin alpha-7 OS=Mus musculus GN=Itga7 PE=1 SV=3	16.234	1	0	1.1	129329	58	1	1	1	1	8	8	10.5982	12.7249	10.4455	10.6507	10.7898	10.8819	10.9778	11.9882	9.13483	13.1387	10.5808	10.2934	10.8596	11.0634	11.3406	-0.31785	0.762022	1			-0.0715748	0.846031	0			0.0546539	0.931451	0			0.300929	0.776726	1
sp|P43406|ITAV_MOUSE	Itgav	Integrin alpha-V OS=Mus musculus GN=Itgav PE=1 SV=2	167.5	1	0	8.24	115360	61	6	6	6	6	18	18	10.7701	14.8083	10.4455	11.6349	10.5173	11.6825	10.9778	11.9882	8.99777	14.7634	10.5808	12.4793	12.1297	11.0634	11.5522	-0.209376	0.899752	2.66667	+		0.290287	0.565085	0	+		-0.623234	0.574857	1	+		-0.123572	0.937264	1.66667	+
sp|P09055|ITB1_MOUSE	Itgb1	Integrin beta-1 OS=Mus musculus GN=Itgb1 PE=1 SV=1	702.711	1	0	38.97	88231	39	24	24	26	26	113	113	14.7973	19.5297	13.5448	14.3534	14.8978	13.5231	14.1342	11.9882	13.6385	19.2525	12.0781	14.0898	14.2971	13.7583	15.5065	-0.791553	0.714085	160.333	+		0.884782	0.344839	305.333	+		-1.92046	0.243188	218.667	+		-0.244129	0.902366	247	+
sp|Q9Z0T9|ITB6_MOUSE	Itgb6	Integrin beta-6 OS=Mus musculus GN=Itgb6 PE=1 SV=1	38.973	1	0	1.14	86042	40	1	1	1	1	4	4	10.5982	16.7108	10.4455	10.6507	10.7898	10.8819	10.9778	11.9882	11.3092	14.8734	10.5808	10.2934	10.8596	11.4077	11.3406	-0.337052	0.862618	11.1667	+		0.0431976	0.909216	0			-0.941834	0.568661	6.66667			-0.561584	0.674545	4.5	+
sp|Q61702|ITIH1_MOUSE	Itih1	Inter-alpha-trypsin inhibitor heavy chain H1 OS=Mus musculus GN=Itih1 PE=1 SV=2	39.495	1	1	1.87	101067	46	2	2	2	2	15	15	14.7674	9.99847	10.7486	10.6507	11.0196	11.3069	12.7355	11.9882	11.3278	11.2597	9.72951	8.93229	12.7335	11.6169	11.3406	-1.22896	0.359076	13.3333	+		0.134449	0.824726	0	+		0.221258	0.854215	3.66667	+		1.58467	0.0990208	9.66667	+
sp|Q61703|ITIH2_MOUSE	Itih2	Inter-alpha-trypsin inhibitor heavy chain H2 OS=Mus musculus GN=Itih2 PE=1 SV=1	150.484	1	1	7.82	105928	51	8	8	8	8	48	48	18.3806	15.6524	16.5523	15.1072	14.8484	16.6351	15.7395	14.0819	16.5457	14.2713	15.9842	15.153	15.0082	16.1837	14.7537	-0.934566	0.325203	3	+		-0.0110395	0.988829	3.66667	+		-1.0969	0.271185	3.33333	+		-0.173377	0.812509	3.33333	+
sp|Q61704|ITIH3_MOUSE	Itih3	Inter-alpha-trypsin inhibitor heavy chain H3 OS=Mus musculus GN=Itih3 PE=1 SV=3	169.884	1	1	14.96	99358	47	7	7	7	7	13	13	13.2486	14.8867	13.8751	14.4909	12.1978	15.602	15.4104	13.9061	13.6257	13.6459	14.4548	15.1236	12.0818	14.5456	14.5402	0.0871609	0.869449	11	+		-0.556547	0.651707	0	+		0.153754	0.865263	4	+		-0.489954	0.570605	7	+
sp|P11881|ITPR1_MOUSE	Itpr1	Inositol 1,4,5-trisphosphate receptor type 1 OS=Mus musculus GN=Itpr1 PE=1 SV=2	155.961	1	0	2.84	313167	159	6	6	6	6	24	24	11.4087	14.4644	13.916	10.6507	10.7898	13.7205	13.8061	11.9882	8.77505	15.3281	13.4524	11.6792	10.8596	13.7632	12.0564	-0.301255	0.863322	1	+		-0.349724	0.766041	0	+		-0.0337712	0.978146	1	+		-0.0822403	0.965198	0	+
sp|Q9Z0R4|ITSN1_MOUSE	Itsn1	Intersectin-1 OS=Mus musculus GN=Itsn1 PE=1 SV=2	13.747	1	0	0.7	194297	96	1	1	1	1	1	1	10.9812	9.99847	10.4455	10.6507	10.7898	10.8819	10.7295	11.9882	8.57898	10.785	10.5808	10.2934	10.8596	11.0634	11.3406	-0.459394	0.430836	3.5			-0.00949352	0.98063	0			0.578419	0.161725	1.5			1.02832	0.151187	2
sp|Q9Z0R6|ITSN2_MOUSE	Itsn2	Intersectin-2 OS=Mus musculus GN=Itsn2 PE=1 SV=2	41.736	1	0	2.77	188908	96	4	4	4	4	10	10	13.2246	9.99847	11.7065	10.6507	10.7898	10.8819	10.9778	13.3112	12.7343	10.2729	10.8322	10.2934	10.8596	11.0634	12.438	-0.361864	0.705634	3	+		-0.0365003	0.966649	3.66667			0.0951371	0.921887	1	+		0.4205	0.623091	5.66667	+
sp|Q9JHI5|IVD_MOUSE	Ivd	Isovaleryl-CoA dehydrogenase, mitochondrial OS=Mus musculus GN=Ivd PE=1 SV=1	21.082	1	0	2.59	46325	24	1	1	1	1	2	2	10.5982	12.5145	10.4455	10.6507	10.7898	10.8819	10.9778	11.9882	8.93934	12.8987	10.5808	10.2934	10.8596	11.0634	11.3406	-0.374142	0.709279	1	+		-0.0715748	0.846031	0			0.10724	0.855284	0			0.409808	0.693109	1	+
sp|Q6ZQF7|JADE2_MOUSE	Jade2	E3 ubiquitin-protein ligase Jade-2 OS=Mus musculus GN=Jade2 PE=1 SV=2	14.099	1	0	1.69	92174	41	1	1	1	1	1	1	10.5982	10.2363	10.4455	10.6507	13.4656	10.8819	10.9778	11.9882	9.51468	11.2787	10.5808	10.2934	10.8596	11.0634	11.3406	-0.0657279	0.867213	3.5	+		-0.740527	0.350793	0			1.34575	0.0686544	2			0.670955	0.193954	1.5	+
sp|Q9D8B7|JAM3_MOUSE	Jam3	Junctional adhesion molecule C OS=Mus musculus GN=Jam3 PE=1 SV=2	58.598	1	0	7.42	34838	21	2	2	2	2	4	4	10.5982	12.9326	10.4455	10.6507	10.7898	10.8819	10.9778	11.9882	9.13483	14.7749	10.5808	10.2934	10.8596	11.0634	11.3406	0.0392677	0.978041	5.33333			-0.0715748	0.846031	0			0.00272167	0.996823	1			-0.108121	0.943984	4.33333
sp|P01592|IGJ_MOUSE	Jchain	Immunoglobulin J chain OS=Mus musculus GN=Jchain PE=1 SV=4	111.697	1	0	25.16	18014	9	3	3	4	4	75	75	13.9404	14.1427	15.4205	14.6538	12.0601	16.5575	16.403	14.9281	12.9101	13.6847	14.888	14.8708	15.7441	17.1198	16.1926	-0.450954	0.470141	12.1667	+		1.36497	0.33474	3.5	+		0.447836	0.696342	9	+		2.26376	0.0191355	6.66667	+	+
sp|O88824|JTB_MOUSE	Jtb	Protein JTB OS=Mus musculus GN=Jtb PE=1 SV=1	10.674	1	0	8.9	16329	7	1	1	1	1	1	1	10.5982	10.3021	10.4455	10.6507	10.7898	10.8819	10.9778	11.9882	9.13483	11.4548	10.5808	10.2934	10.8596	11.0634	11.3406	-0.133134	0.793063	25.1667			-0.0715748	0.846031	19.5			0.660339	0.0629357	27			0.721899	0.267383	17.6667
sp|Q02257|PLAK_MOUSE	Jup	Junction plakoglobin OS=Mus musculus GN=Jup PE=1 SV=3	275.07	1	0	18.12	81801	47	11	11	13	13	118	118	14.2782	14.7835	13.75	13.8838	15.2417	17.0368	17.1066	14.4763	12.8992	15.7626	16.4737	13.7425	16.2482	16.8022	12.0677	0.545587	0.553615	18.8333	+		-0.925992	0.557113	19.8333	+		1.79147	0.0424215	20.5	+	+	0.319894	0.849037	18.1667	+
sp|Q8BX02|KANK2_MOUSE	Kank2	KN motif and ankyrin repeat domain-containing protein 2 OS=Mus musculus GN=Kank2 PE=1 SV=1	352.171	1	0	21.12	90245	53	12	12	12	12	64	64	16.5012	13.595	15.8817	16.8226	13.5165	11.544	16.2879	14.3627	16.5642	14.4713	15.8518	15.4514	11.6719	15.8982	15.2518	-0.115416	0.89634	4	+		0.346172	0.837379	1	+		-1.77232	0.19777	2.5	+		-1.31073	0.32995	2.5	+
sp|Q99MN1|SYK_MOUSE	Kars	Lysine--tRNA ligase OS=Mus musculus GN=Kars PE=1 SV=1	1037.34	1	0	52.1	67840	32	27	27	32	32	253	253	13.984	18.3575	17.7752	21.7546	14.1101	15.3206	15.1507	16.8544	14.2056	17.4394	17.6809	21.8537	13.4175	13.9442	17.7266	-0.172929	0.940819	25.3333	+		-0.329516	0.812537	0	+		-2.60887	0.173431	12	+		-2.76545	0.259489	13.3333	+
sp|Q8BHI4|KBTB3_MOUSE	Kbtbd3	Kelch repeat and BTB domain-containing protein 3 OS=Mus musculus GN=Kbtbd3 PE=2 SV=1	22.894	1	0	1.15	69551	39	1	1	1	1	46	46	11.7248	11.5175	11.8377	10.6507	11.702	15.0491	14.7246	14.3896	12.6257	11.2871	12.2496	11.0545	16.2509	15.8468	11.3406	0.371574	0.452696	5.5	+		0.513102	0.761265	0	+		2.53367	0.0206286	2	+		2.6752	0.112278	3.5	+
sp|Q80UY2|KCMF1_MOUSE	Kcmf1	E3 ubiquitin-protein ligase KCMF1 OS=Mus musculus GN=Kcmf1 PE=1 SV=1	150.27	1	0	7.35	41791	18	2	2	3	3	19	19	13.2497	10.0451	10.3174	10.3069	10.7898	10.8819	10.9778	11.9882	11.5733	11.1747	10.6283	10.3254	10.8596	11.0634	11.3406	-0.0543281	0.948621	4	+		-0.0715748	0.846031	0			0.17969	0.831564	1	+		0.162444	0.661599	3	+
sp|P63143|KCAB1_MOUSE	Kcnab1	Voltage-gated potassium channel subunit beta-1 OS=Mus musculus GN=Kcnab1 PE=1 SV=2	305.824	1	0	14.71	44723	24	5	1	13	2	72	5	16.8904	9.99847	10.4455	10.6507	12.4057	10.8819	10.9778	11.9882	14.5652	12.1174	10.5808	10.2934	10.8596	11.0634	11.3406	-0.107029	0.957061	2.5	+		-0.475557	0.348628	0			-0.432823	0.805265	2.5			-0.801351	0.521369	0	+
sp|P62482|KCAB2_MOUSE	Kcnab2	Voltage-gated potassium channel subunit beta-2 OS=Mus musculus GN=Kcnab2 PE=1 SV=1	995.394	1	0	59.95	41021	21	19	15	31	20	298	231	20.0653	14.7591	16.4119	15.6579	13.1661	16.2422	10.9778	11.9882	19.4133	14.1553	14.1309	10.8925	14.7762	13.7751	13.5369	-2.07556	0.36391	0	+		0.935795	0.529721	17.5	+		-3.62995	0.0675267	10.5	+		-0.618594	0.78124	7	+
sp|Q6PCM1|KDM3A_MOUSE	Kdm3a	Lysine-specific demethylase 3A OS=Mus musculus GN=Kdm3a PE=1 SV=1	152.073	1	0	6.2	147847	90	6	6	6	6	15	15	13.3642	11.1633	10.4455	10.6507	10.7898	10.8819	10.9778	11.9882	14.5603	11.3909	10.5808	11.1535	10.8596	11.0634	12.6666	0.515492	0.661181	11.6667	+		0.370411	0.551752	0			-0.24644	0.745744	1	+		-0.391521	0.750026	10.6667	+
sp|Q60749|KHDR1_MOUSE	Khdrbs1	KH domain-containing, RNA-binding, signal transduction-associated protein 1 OS=Mus musculus GN=Khdrbs1 PE=1 SV=2	148.863	1	0	14.22	48371	21	6	6	6	6	83	83	20.1953	15.399	14.0484	13.9778	17.1193	16.0508	18.0182	16.2263	16.589	14.9669	14.7973	13.9681	17.691	17.6403	15.1216	-0.82478	0.617318	2	+		-0.0360011	0.969281	0	+		0.94855	0.559413	1	+		1.73733	0.130555	1	+
sp|Q9R226|KHDR3_MOUSE	Khdrbs3	KH domain-containing, RNA-binding, signal transduction-associated protein 3 OS=Mus musculus GN=Khdrbs3 PE=1 SV=1	135.748	1	0	18.21	38807	19	6	6	7	7	23	23	11.4402	11.7866	11.8632	10.6507	17.8665	15.9001	18.0073	13.5308	11.3973	12.3018	13.6177	11.7931	17.3928	17.8838	13.5803	0.842301	0.181506	51.5	+		-0.0405523	0.981714	141.833	+		4.89102	0.0040625	118.167	+	+	4.00817	0.0254675	75.1667	+	+
sp|Q3U0V1|FUBP2_MOUSE	Khsrp	Far upstream element-binding protein 2 OS=Mus musculus GN=Khsrp PE=1 SV=2	1079.47	1	0	40.64	76775	39	26	25	29	28	278	277	16.1969	21.0244	16.0121	11.0507	10.7898	16.5137	12.4153	11.9882	16.4672	20.8334	16.3556	15.1117	12.1744	13.9468	13.5837	1.12092	0.655685	27.1667	+		0.308219	0.849256	0	+		-3.14427	0.235704	12.1667	+		-3.95696	0.0509823	15	+
sp|Q6A000|MOONR_MOUSE	Kiaa0753	Protein moonraker OS=Mus musculus GN=Kiaa0753 PE=1 SV=2	16.53	1	0	0.94	108875	69	1	1	1	1	3	3	10.5982	12.5163	10.4455	10.6507	10.7898	10.8819	10.9778	11.9882	9.13483	12.29	10.5808	10.2934	10.8596	11.0634	11.3406	-0.477885	0.579082	3			-0.0715748	0.846031	0			0.106786	0.855988	1			0.513096	0.539597	2
sp|Q8BWY9|CIP2A_MOUSE	Kiaa1524	Protein CIP2A OS=Mus musculus GN=Kiaa1524 PE=1 SV=3	84.869	1	0	3.42	102043	61	3	3	3	3	11	11	15.6649	11.4661	11.187	10.2593	11.0454	10.8819	10.9778	11.9882	12.6114	12.5143	11.3044	11.1225	10.8596	11.0634	11.3406	-0.256159	0.846077	3	+		-0.13546	0.694861	0			-0.920993	0.481876	3	+		-0.800295	0.154962	0	+
sp|Q6P9P6|KIF11_MOUSE	Kif11	Kinesin-like protein KIF11 OS=Mus musculus GN=Kif11 PE=1 SV=1	1110.87	1	0	50.1	118027	75	36	36	38	38	141	141	17.4973	19.1172	14.0879	16.2209	15.0579	12.8658	13.9724	13.2113	16.007	18.6267	13.9186	17.4889	15.9442	13.7225	13.5377	-0.220558	0.885659	70.3333	+		0.624589	0.502691	7.5	+		-2.95398	0.0446702	33.1667	+	+	-2.10883	0.183292	44.6667	+
sp|O35071|KIF1C_MOUSE	Kif1c	Kinesin-like protein KIF1C OS=Mus musculus GN=Kif1c PE=1 SV=2	32.975	3	0	1.18	122434	68	1	1	1	1	9	9	10.8901	11.1087	11.0267	10.6507	10.7898	10.5931	11.4097	11.9882	9.08898	11.3678	10.889	10.2934	10.8596	12.0243	11.3809	-0.509207	0.349699	1	+		0.22641	0.64942	0	+		0.276218	0.43718	0	+		1.01183	0.178523	1	+
sp|P28740|KIF2A_MOUSE	Kif2a	Kinesin-like protein KIF2A OS=Mus musculus GN=Kif2a PE=1 SV=2	29.126	1	0	1.56	79756	44	1	1	1	1	5	5	10.7294	9.90617	10.4455	10.6507	10.7898	10.8819	10.9778	11.9882	10.2751	11.0108	10.5808	10.5555	10.7626	11.0837	11.3406	0.172627	0.498513	5	+		-0.097143	0.797209	0	+		0.726529	0.0731668	1	+		0.456759	0.101142	4	+
sp|Q922S8|KIF2C_MOUSE	Kif2c	Kinesin-like protein KIF2C OS=Mus musculus GN=Kif2c PE=1 SV=1	60.023	1	0	3.33	81085	45	2	2	2	2	5	5	13.778	9.99847	10.4455	10.6507	10.7898	10.8819	10.9778	11.9882	12.1611	10.785	10.5808	10.2934	10.8596	11.0634	11.3406	-0.263081	0.792895	3			-0.0715748	0.846031	0			-0.0587116	0.950544	2			0.132794	0.802715	1
sp|P33174|KIF4_MOUSE	Kif4	Chromosome-associated kinesin KIF4 OS=Mus musculus GN=Kif4 PE=1 SV=3	216.404	1	0	9.59	139519	68	9	9	9	9	42	42	15.9063	13.1858	10.9225	10.4804	12.287	12.8686	11.1155	11.9882	14.5469	13.721	10.676	13.7067	12.5957	13.5415	11.2169	0.538959	0.733018	58.1667	+		0.386541	0.610137	51	+		-0.558908	0.68154	50.5	+		-0.711326	0.565033	58.6667	+
sp|Q9DBS5|KLC4_MOUSE	Klc4	Kinesin light chain 4 OS=Mus musculus GN=Klc4 PE=1 SV=1	47.157	1	0	2.75	68613	42	1	1	1	1	4	4	11.5881	11.09	10.4455	10.6507	10.7898	10.8819	10.9778	11.9882	9.9241	11.3261	10.5808	10.2934	10.8596	11.0634	11.3406	-0.412456	0.331581	21.5	+		-0.0715748	0.846031	0			0.215871	0.587583	16	+		0.556752	0.193143	5.5	+
sp|Q6PAR0|KLD10_MOUSE	Klhdc10	Kelch domain-containing protein 10 OS=Mus musculus GN=Klhdc10 PE=1 SV=1	274.313	1	0	21.18	49012	22	7	7	7	7	49	49	15.7206	13.5081	17.0571	14.4794	14.2416	12.7216	11.9492	17.5867	15.9126	13.214	16.2642	19.0727	13.459	11.0634	17.6786	0.924595	0.540154	19.5	+		-0.0577821	0.979978	20.8333	+		-1.06652	0.494409	21	+		-2.0489	0.384592	19.3333	+
sp|Q80T74|KLH29_MOUSE	Klhl29	Kelch-like protein 29 OS=Mus musculus GN=Klhl29 PE=2 SV=3	11.947	1	0	1.49	94359	39	1	1	1	1	1	1	9.5615	9.99847	10.4455	10.6507	10.7898	10.8819	10.9778	11.9882	7.29409	10.785	10.5808	10.2934	10.8596	11.0634	11.3406	-0.425692	0.636697	5.5			-0.0715748	0.846031	0			0.995426	0.0359254	2.5			1.34954	0.226273	3
sp|O08677|KNG1_MOUSE	Kng1	Kininogen-1 OS=Mus musculus GN=Kng1 PE=1 SV=1	237.472	1	0	19.21	73102	33	9	9	10	10	73	73	15.5159	15.4784	17.8772	17.4179	14.8276	15.3789	14.6654	15.9357	15.5253	15.478	17.6412	17.6252	15.5313	15.7817	16.8228	-0.00488711	0.995745	691.833	+		0.843354	0.136151	601.667	+		-1.37042	0.0945576	668.333	+		-0.522181	0.542653	625.167	+
sp|P52293|IMA1_MOUSE	Kpna2	Importin subunit alpha-1 OS=Mus musculus GN=Kpna2 PE=1 SV=2	86.355	1	0	9.07	57928	28	3	3	3	3	7	7	14.4105	9.99847	11.8943	12.5182	10.7898	10.8819	10.9778	11.9882	10.5324	11.9502	10.5808	13.212	10.8596	11.0634	11.3406	-0.636526	0.587648	1.5	+		-0.0715748	0.846031	0			-1.04593	0.313737	0	+		-0.480982	0.556982	1.5	+
sp|O35343|IMA3_MOUSE	Kpna4	Importin subunit alpha-3 OS=Mus musculus GN=Kpna4 PE=1 SV=1	73.459	1	1	4.99	57923	20	2	2	2	2	4	4	10.4424	9.99847	10.4455	10.6507	10.7898	10.8819	10.9778	11.9882	9.18121	10.785	10.5808	10.2934	9.6757	11.0634	11.3406	-0.174134	0.665355	3			-0.466226	0.429587	0			0.775204	0.0469803	1.5			0.483111	0.459954	1.5
sp|P70168|IMB1_MOUSE	Kpnb1	Importin subunit beta-1 OS=Mus musculus GN=Kpnb1 PE=1 SV=2	168.138	1	0	9.59	97184	44	7	7	7	7	45	45	16.8664	13.6046	13.2593	15.7877	13.9394	10.8819	10.9778	11.9882	13.5812	14.1255	14.0669	16.6611	11.7519	12.7063	11.5943	-0.27081	0.815582	20.1667	+		0.0706864	0.939686	0	+		-2.93265	0.0397398	9	+	+	-2.59116	0.0311167	11.1667	+	+
sp|P04104|K2C1_MOUSE	Krt1	Keratin, type II cytoskeletal 1 OS=Mus musculus GN=Krt1 PE=1 SV=4	236.934	1	3	7.22	65606	35	7	1	7	1	957	2	10.5982	9.99847	10.4455	10.6507	11.8461	10.8819	10.9778	11.9882	10.4491	10.785	10.5808	10.2934	10.8596	14.494	12.2036	0.103891	0.586925	1			1.09557	0.301153	0	+		1.00031	0.0212222	1			1.99199	0.0768571	0	+
sp|Q3UV17|K22O_MOUSE	Krt76	Keratin, type II cytoskeletal 2 oral OS=Mus musculus GN=Krt76 PE=1 SV=1	381.03	1	13	14.48	62845	40	14	1	14	1	373	130	21.1787	18.0296	19.8377	20.0623	21.5314	20.736	21.2642	21.4175	17.4047	21.1432	21.1679	20.4349	21.6518	21.322	20.4705	0.260579	0.82166	9	+		-0.0891797	0.814461	0	+		1.46018	0.0738866	0	+		1.11042	0.358255	9	+
sp|Q61097|KSR1_MOUSE	Ksr1	Kinase suppressor of Ras 1 OS=Mus musculus GN=Ksr1 PE=1 SV=1	48.744	1	0	2.18	96755	54	1	1	1	1	3	3	10.7131	9.99847	10.4455	10.6507	10.7898	10.8819	10.9778	11.9882	9.93689	10.785	10.5808	10.2934	10.8596	11.0634	11.3406	-0.052893	0.836205	4.5			-0.0715748	0.846031	0			0.707525	0.0705934	3.5			0.688843	0.038541	1
sp|Q61595|KTN1_MOUSE	Ktn1	Kinectin OS=Mus musculus GN=Ktn1 PE=1 SV=1	175.092	1	0	5.95	152592	91	8	8	8	8	30	30	10.7513	14.364	10.6277	10.6507	12.1807	10.8819	10.9778	11.9882	9.92218	15.7945	10.5808	10.2934	11.4961	11.2339	11.3406	0.0493185	0.977359	9.66667	+		-0.150307	0.724352	0	+		-0.0912373	0.928971	4	+		-0.290862	0.866551	5.66667	+
sp|Q91YP0|L2HDH_MOUSE	L2hgdh	L-2-hydroxyglutarate dehydrogenase, mitochondrial OS=Mus musculus GN=L2hgdh PE=1 SV=1	16.857	1	0	1.94	50899	30	1	1	1	1	1	1	10.5982	10.3775	10.4455	10.6507	10.7898	10.8819	10.9778	11.9882	9.00979	11.7041	10.5808	10.2934	10.8596	11.0634	11.3406	-0.120912	0.835416	9.66667	+		-0.0715748	0.846031	0			0.6415	0.0661755	3			0.690837	0.346676	6.66667	+
sp|P02468|LAMC1_MOUSE	Lamc1	Laminin subunit gamma-1 OS=Mus musculus GN=Lamc1 PE=1 SV=2	28.357	1	0	1.24	177298	88	2	2	2	2	2	2	10.5982	11.4088	10.4455	10.4551	10.7898	10.9128	10.8296	11.9882	7.69336	12.6445	10.5808	9.58011	10.8596	10.8924	11.3406	-0.6022	0.589449	53.3333	+		-0.0992264	0.795925	0	+		0.403205	0.315145	16.5	+		0.906178	0.493462	36.8333	+
sp|P11438|LAMP1_MOUSE	Lamp1	Lysosome-associated membrane glycoprotein 1 OS=Mus musculus GN=Lamp1 PE=1 SV=2	150.007	1	0	9.61	43865	18	4	4	5	5	34	34	12.7948	17.4566	12.8322	12.2658	12.6569	13.2578	13.0195	12.5098	12.1718	18.145	12.574	12.9979	13.5393	13.8737	13.6769	0.134801	0.944386	230.5	+		0.835659	0.0120162	7.5	+		-0.976362	0.455882	60.5	+		-0.275504	0.874673	177.5	+
sp|P17047|LAMP2_MOUSE	Lamp2	Lysosome-associated membrane glycoprotein 2 OS=Mus musculus GN=Lamp2 PE=1 SV=2	43.378	1	0	6.51	45681	22	3	3	3	3	5	5	10.5982	15.7685	10.4455	10.6507	10.7898	10.8819	10.9778	11.9882	10.6514	11.3764	10.5808	10.2934	11.8986	11.0634	16.5883	-1.1402	0.421516	2.5	+		2.02398	0.228616	0	+		-0.706264	0.61479	1			2.45792	0.154044	1.5	+
sp|O89112|LANC1_MOUSE	Lancl1	LanC-like protein 1 OS=Mus musculus GN=Lancl1 PE=1 SV=1	17.57	1	0	3.01	45341	21	1	1	1	1	1	1	10.5982	11.3193	12.7834	12.0366	10.7898	10.8819	10.9778	11.9882	9.55163	11.7895	12.7749	13.5049	10.8596	11.0634	11.3406	0.220861	0.829087	11.1667	+		-0.0715748	0.846031	0			-0.524903	0.373562	4.5	+		-0.817338	0.4609	6.66667	+
sp|Q9JJK2|LANC2_MOUSE	Lancl2	LanC-like protein 2 OS=Mus musculus GN=Lancl2 PE=1 SV=1	54.744	1	0	3.11	50777	26	1	1	1	1	4	4	11.2787	10.9293	11.9226	11.2202	10.7898	10.8819	10.9778	11.9882	10.977	10.785	11.627	12.155	10.8596	11.0634	11.3406	0.0483216	0.902159	1	+		-0.0715748	0.846031	0			-0.178234	0.62758	1	+		-0.29813	0.477629	0	+
sp|Q9CPY7|AMPL_MOUSE	Lap3	Cytosol aminopeptidase OS=Mus musculus GN=Lap3 PE=1 SV=3	31.853	1	0	4.62	56141	30	2	2	2	2	15	15	10.5982	12.5521	10.6923	10.6507	10.7898	10.8819	10.9778	11.9882	9.57422	13.0011	13.3137	10.2934	10.8596	11.7021	11.3406	0.422294	0.703529	171.833	+		0.141338	0.730589	3.33333			0.0361414	0.949946	114	+		-0.244814	0.837849	61.1667	+
sp|Q6ZQ58|LARP1_MOUSE	Larp1	La-related protein 1 OS=Mus musculus GN=Larp1 PE=1 SV=3	217.041	1	0	12.41	121125	65	7	7	7	7	24	24	13.5341	12.9859	12.432	14.8415	12.4841	10.8819	11.368	11.9882	13.6934	11.386	13.5926	15.1596	11.9988	11.0634	14.5254	0.00950607	0.992205	4	+		0.848631	0.416928	0	+		-1.76783	0.0298192	0	+		-0.928708	0.495226	4	+
sp|Q8BWW4|LARP4_MOUSE	Larp4	La-related protein 4 OS=Mus musculus GN=Larp4 PE=1 SV=2	35.22	1	0	4.17	79763	33	3	3	3	3	4	4	13.3105	12.2827	10.4455	12.2698	10.7898	10.8819	10.9778	11.9882	14.808	13.702	13.3267	11.2371	10.8596	11.0634	11.3406	1.1913	0.258849	2	+		-0.0715748	0.846031	0			-0.917673	0.212609	0	+		-2.18055	0.0581267	2	+
sp|Q6A0A2|LAR4B_MOUSE	Larp4b	La-related protein 4B OS=Mus musculus GN=Larp4b PE=1 SV=2	65.921	1	0	6.21	81627	41	4	4	4	4	13	13	10.5982	10.5364	14.4435	10.6507	10.7898	11.0598	10.9778	11.9882	14.4979	10.706	13.3117	10.2934	10.8596	12.1206	11.3406	0.645066	0.661047	65.6667	+		0.236371	0.615091	0			-0.353264	0.735685	26.8333	+		-0.761958	0.565971	38.8333	+
sp|Q3U9G9|LBR_MOUSE	Lbr	Lamin-B receptor OS=Mus musculus GN=Lbr PE=1 SV=2	240.404	1	0	17.73	71440	30	9	9	9	9	24	24	10.9477	16.0421	12.3218	12.9663	14.8062	14.3661	14.8264	13.0037	12.4809	16.7456	11.8129	12.2046	15.4727	15.9159	12.6573	0.24152	0.883337	3.33333	+		0.431357	0.682164	0	+		1.18113	0.34744	0	+		1.37096	0.43319	3.33333	+
sp|P16301|LCAT_MOUSE	Lcat	Phosphatidylcholine-sterol acyltransferase OS=Mus musculus GN=Lcat PE=1 SV=2	32.057	1	0	2.51	49747	26	1	1	1	1	3	3	10.5982	12.3734	10.9203	10.6507	10.7898	10.8819	10.9778	11.9882	11.2904	12.6482	10.819	10.2934	10.8596	11.0634	11.3406	0.127104	0.852691	41	+		-0.0715748	0.846031	1			0.0238205	0.963765	15	+		-0.174858	0.785347	27	+
sp|P06240|LCK_MOUSE	Lck	Proto-oncogene tyrosine-protein kinase LCK OS=Mus musculus GN=Lck PE=1 SV=4	18.671	3	11	3.54	57943	28	2	1	2	1	4	1	10.7489	11.7169	10.4339	11.183	10.7898	11.2969	10.9778	11.9882	10.2986	12.1873	10.847	11.7671	10.8596	10.8087	12.1344	0.25433	0.636755	12	+		0.00439929	0.993017	0	+		0.242526	0.550088	6	+		-0.00740419	0.990994	6	+
sp|Q3UN02|LCLT1_MOUSE	Lclat1	Lysocardiolipin acyltransferase 1 OS=Mus musculus GN=Lclat1 PE=1 SV=2	85.779	1	0	10.37	44400	19	4	4	4	4	9	9	12.7045	15.1957	10.4455	10.6507	10.7898	10.2747	10.9778	11.9882	10.1847	14.3572	10.5808	10.2934	10.8596	10.0449	12.3297	-0.895044	0.571181	3	+		0.0704234	0.924033	2	+		-1.24143	0.327023	1	+		-0.275964	0.841898	4	+
sp|Q8BVA5|LDAH_MOUSE	Ldah	Lipid droplet-associated hydrolase OS=Mus musculus GN=Ldah PE=1 SV=1	85.827	1	0	19.33	37374	22	4	4	4	4	24	24	15.5222	14.0063	10.4455	10.6507	10.7898	10.8819	10.9778	11.9882	13.8387	14.4594	10.5808	10.2934	11.4062	11.0634	11.3406	-0.363048	0.833863	279.333	+		0.110621	0.759118	155.167			-1.49671	0.289047	221.167	+		-1.02304	0.460944	213.333	+
sp|Q9JKS4|LDB3_MOUSE	Ldb3	LIM domain-binding protein 3 OS=Mus musculus GN=Ldb3 PE=1 SV=1	347.917	1	0	19.92	76432	31	11	11	12	12	48	48	13.9317	13.9288	15.1966	12.212	11.3475	10.8819	10.9778	11.9882	17.0279	13.3725	13.9557	12.9238	10.8679	11.5227	11.647	0.502673	0.666899	1	+		0.0470207	0.90091	0	+		-2.51841	0.00892485	1	+		-2.97407	0.0445353	0	+
sp|P06151|LDHA_MOUSE	Ldha	L-lactate dehydrogenase A chain OS=Mus musculus GN=Ldha PE=1 SV=3	500.486	1	2	62.35	36499	23	15	15	15	15	157	157	17.8915	18.176	18.0829	19.6955	14.8917	18.0314	15.7129	13.7209	16.7324	18.5298	18.0074	18.8945	15.869	16.2343	14.5169	-0.420456	0.528957	0	+		-0.0491604	0.96792	13.5	+		-2.87223	0.028475	6.16667	+	+	-2.50094	0.0168558	7.33333	+	+
sp|P35951|LDLR_MOUSE	Ldlr	Low-density lipoprotein receptor OS=Mus musculus GN=Ldlr PE=1 SV=2	82.947	1	0	2.9	94947	46	2	2	2	2	2	2	10.5982	13.6544	10.4455	10.6507	10.7898	10.8819	10.9778	11.9882	9.13483	12.5202	10.5808	10.2934	10.8596	11.0634	11.3406	-0.704873	0.52513	1.33333			-0.0715748	0.846031	0			-0.177733	0.836054	0			0.455565	0.610655	1.33333
sp|Q9DB98|LENG1_MOUSE	Leng1	Leukocyte receptor cluster member 1 homolog OS=Mus musculus GN=Leng1 PE=2 SV=1	66.787	1	0	12.26	30469	14	3	3	3	3	15	15	11.6439	8.75793	13.7283	10.6507	11.3511	10.7759	10.9778	11.9882	8.79265	10.785	13.071	10.2934	13.4865	11.0634	11.3406	-0.459698	0.747338	4.66667	+		0.690205	0.378096	1	+		0.0780671	0.944144	2.66667	+		1.22797	0.363553	3	+
sp|Q9Z2I0|LETM1_MOUSE	Letm1	Mitochondrial proton/calcium exchanger protein OS=Mus musculus GN=Letm1 PE=1 SV=1	28.704	1	0	1.63	82989	49	1	1	1	1	3	3	10.5982	9.61289	10.4455	10.6507	10.7898	10.8819	10.9778	11.9882	9.13483	11.852	10.5808	10.2934	10.8596	11.0634	11.3406	0.138473	0.827446	6.83333			-0.0715748	0.846031	0			0.832647	0.0649736	3.5			0.622599	0.395684	3.33333
sp|P37913|DNLI1_MOUSE	Lig1	DNA ligase 1 OS=Mus musculus GN=Lig1 PE=1 SV=2	190.9	1	0	16.7	102290	54	11	11	11	11	50	50	16.5156	14.5579	14.7062	15.851	13.1911	14.0229	15.2851	15.021	16.4086	15.9219	13.9332	15.692	16.0686	16.269	19.1018	0.0812779	0.913193	6	+		2.76645	0.0391911	0	+		-1.02766	0.176744	4	+		1.65751	0.171477	2	+
sp|Q91XD2|LIMS2_MOUSE	Lims2	LIM and senescent cell antigen-like-containing domain protein 2 OS=Mus musculus GN=Lims2 PE=1 SV=1	14.601	2	0	2.64	39031	20	1	1	1	1	3	3	12.1693	10.4159	10.4455	11.0125	10.7898	10.8819	10.9778	11.9882	11.463	10.7461	10.5808	10.6687	10.8596	11.0634	11.1139	-0.14617	0.759949	1.5	+		-0.14713	0.680055	0			0.148638	0.774423	0	+		0.147678	0.577474	1.5	+
sp|P54310|LIPS_MOUSE	Lipe	Hormone-sensitive lipase OS=Mus musculus GN=Lipe PE=1 SV=2	296.227	1	0	17.92	83348	49	10	10	11	11	34	34	10.9806	16.1154	17.8385	11.3991	10.877	17.8328	18.1396	16.9458	16.6678	15.9784	17.0762	10.2934	10.8596	17.1631	12.6807	0.920555	0.706689	2	+		-2.38098	0.394787	0	+		1.86539	0.469619	2	+		-1.43614	0.582499	0	+
sp|Q9D0F3|LMAN1_MOUSE	Lman1	Protein ERGIC-53 OS=Mus musculus GN=Lman1 PE=1 SV=1	41.605	1	0	2.13	57789	24	1	1	1	1	7	7	10.5982	14.8796	10.4455	10.6507	11.4792	10.8819	10.9778	11.9882	10.1362	14.2645	10.5808	10.2934	10.8596	11.0634	11.3406	-0.324729	0.83162	2.5	+		-0.243909	0.484797	0			-0.311693	0.78816	1			-0.230873	0.851683	1.5	+
sp|Q9DBH5|LMAN2_MOUSE	Lman2	Vesicular integral-membrane protein VIP36 OS=Mus musculus GN=Lman2 PE=1 SV=2	35.34	1	0	5.31	40430	23	2	2	2	2	5	5	10.5982	14.1767	10.4455	10.6507	10.7898	10.8819	10.9778	11.9882	10.6609	13.9009	10.8834	10.3999	10.8596	11.0634	12.7838	-0.00648384	0.995932	5	+		0.409478	0.530474	0			-0.308313	0.755579	0			0.107649	0.925542	5	+
sp|P48678|LMNA_MOUSE	Lmna	Prelamin-A/C OS=Mus musculus GN=Lmna PE=1 SV=2	757.687	1	1	46.62	74238	46	25	24	25	24	273	254	17.4015	14.964	15.8515	13.0714	18.7874	18.0296	18.5451	17.3626	14.6037	16.0032	16.1799	14.1012	18.8517	19.2242	16.7118	-0.100126	0.926397	2	+		0.0813394	0.918261	29.1667	+		2.85909	0.0244016	16	+	+	3.04055	0.0191905	15.1667	+	+
sp|P14733|LMNB1_MOUSE	Lmnb1	Lamin-B1 OS=Mus musculus GN=Lmnb1 PE=1 SV=3	159.013	1	1	11.39	66786	39	6	5	6	5	56	37	10.562	11.4298	13.0507	11.7394	15.5369	13.9048	14.0858	13.203	11.8022	14.0045	12.4229	11.0847	15.5868	16.2408	13.5738	0.633101	0.463145	1	+		0.951223	0.332576	0	+		2.48711	0.0128914	1	+		2.80523	0.0372871	0	+
sp|Q8C129|LCAP_MOUSE	Lnpep	Leucyl-cystinyl aminopeptidase OS=Mus musculus GN=Lnpep PE=1 SV=1	429.789	1	0	20.78	117304	56	17	17	17	17	46	46	12.846	17.7453	11.5827	10.6507	13.5596	14.265	14.5747	13.6492	14.7405	16.8297	14.5927	10.2934	11.9417	13.2281	17.1827	0.907894	0.679401	1	+		0.105448	0.940801	0	+		0.805912	0.631869	0	+		0.00346483	0.998743	1	+
sp|Q8CGK3|LONM_MOUSE	Lonp1	Lon protease homolog, mitochondrial OS=Mus musculus GN=Lonp1 PE=1 SV=2	266.4	1	0	13.38	105843	54	9	9	9	9	20	20	10.5982	15.6197	10.5729	12.0273	11.8517	12.9805	10.9778	12.4401	9.13483	16.0873	10.4112	10.3781	10.8596	11.0634	12.762	-0.701655	0.732387	50.5	+		-0.500858	0.515148	32	+		-0.141979	0.914165	47.5	+		0.0588186	0.976622	35	+
sp|Q91ZP3|LPIN1_MOUSE	Lpin1	Phosphatidate phosphatase LPIN1 OS=Mus musculus GN=Lpin1 PE=1 SV=1	23.098	1	0	2.71	102002	54	2	2	2	2	6	6	11.0092	11.5238	10.4455	10.6507	10.7898	10.8819	12.2206	11.9882	12.8699	12.6365	10.5808	10.2934	10.8596	11.0634	11.3406	0.687874	0.371996	2	+		-0.382261	0.437017	0			0.562839	0.246885	2	+		-0.507296	0.556073	0	+
sp|Q6PB66|LPPRC_MOUSE	Lrpprc	Leucine-rich PPR motif-containing protein, mitochondrial OS=Mus musculus GN=Lrpprc PE=1 SV=2	240.351	1	0	7.97	156615	102	9	9	9	9	25	25	12.3919	16.3626	17.8937	17.1847	11.6221	17.9882	19.3054	18.4679	15.1936	17.148	19.0621	17.3539	15.075	19.3258	17.0355	1.23116	0.432026	3	+		0.299537	0.902502	0	+		0.887686	0.693877	1	+		-0.0439325	0.976017	2	+
sp|Q9CRC8|LRC40_MOUSE	Lrrc40	Leucine-rich repeat-containing protein 40 OS=Mus musculus GN=Lrrc40 PE=1 SV=2	215.173	1	0	17.11	68076	40	10	10	10	10	41	41	16.5784	16.4658	13.3916	12.7805	11.8114	12.3503	10.9778	11.9882	16.4622	15.2809	12.8136	12.86	12.2431	11.8904	11.3406	-0.449878	0.750498	39.6667	+		0.0427782	0.920569	3	+		-3.02212	0.0272584	19.6667	+	+	-2.52946	0.0693431	23	+
sp|Q505F5|LRC47_MOUSE	Lrrc47	Leucine-rich repeat-containing protein 47 OS=Mus musculus GN=Lrrc47 PE=1 SV=1	71.131	1	0	4.82	63590	38	2	2	2	2	6	6	11.0908	9.80623	10.4455	10.6507	10.7898	10.8819	10.9778	11.9882	11.4909	10.785	10.5808	11.3923	10.8596	11.0634	11.3406	0.563973	0.156715	52.1667	+		-0.0715748	0.846031	0			0.66117	0.137711	35.1667	+		0.0256224	0.932888	17	+
sp|Q922Q8|LRC59_MOUSE	Lrrc59	Leucine-rich repeat-containing protein 59 OS=Mus musculus GN=Lrrc59 PE=1 SV=1	60.905	1	0	14.33	34877	17	4	4	4	4	12	12	10.5982	15.7553	10.4455	11.947	10.7898	11.3906	12.0073	11.9882	11.8535	15.8712	10.5808	10.2934	11.6714	14.3608	11.3406	-0.036763	0.984227	1.5	+		0.913632	0.34189	0	+		-0.642493	0.630949	0	+		0.307902	0.864889	1.5	+
sp|Q3UZ39|LRRF1_MOUSE	Lrrfip1	Leucine-rich repeat flightless-interacting protein 1 OS=Mus musculus GN=Lrrfip1 PE=1 SV=2	483.108	1	0	43.9	79249	38	17	16	17	16	99	87	13.9275	13.4905	17.9177	10.5939	13.8914	10.8819	10.9778	11.9882	16.0461	13.8501	17.0185	12.525	12.4553	11.4834	11.3406	0.877519	0.646793	30.8333	+		-0.175057	0.849638	0	+		-2.04757	0.263537	7	+		-3.10015	0.0550803	23.8333	+
sp|Q91WK0|LRRF2_MOUSE	Lrrfip2	Leucine-rich repeat flightless-interacting protein 2 OS=Mus musculus GN=Lrrfip2 PE=1 SV=1	194.165	1	0	18.31	47148	23	6	5	6	5	21	9	10.5982	15.2508	10.4461	10.6507	10.7898	10.8122	10.9778	11.9882	10.4101	12.1037	10.5808	10.2934	11.7111	11.9945	11.3406	-0.889425	0.502228	8	+		0.540026	0.207069	0	+		-0.594435	0.639722	4	+		0.835017	0.172599	4	+
sp|Q9D0R8|LSM12_MOUSE	Lsm12	Protein LSM12 homolog OS=Mus musculus GN=Lsm12 PE=1 SV=1	13.991	1	0	5.64	21701	12	1	1	1	1	3	3	11.1385	12.2913	11.3699	11.8866	10.7269	12.1763	12.7147	12.2992	10.0859	12.0375	11.8136	11.6954	11.8069	12.1257	11.2643	-0.263461	0.627973	0	+		-0.246985	0.674313	1	+		0.307723	0.564367	1	+		0.324199	0.593192	0	+
sp|Q8K2F8|LS14A_MOUSE	Lsm14a	Protein LSM14 homolog A OS=Mus musculus GN=Lsm14a PE=1 SV=1	171.822	1	0	27.71	50546	24	12	12	12	12	74	74	19.4774	15.942	18.3211	14.1219	13.6169	12.9089	12.1188	11.9863	17.9375	16.6426	17.438	14.7662	13.0265	10.8472	11.617	-0.269536	0.852375	5.5	+		-0.827493	0.288637	0	+		-4.30789	0.01409	1	+		-4.86584	0.00426208	4.5	+	+
sp|Q8CGC4|LS14B_MOUSE	Lsm14b	Protein LSM14 homolog B OS=Mus musculus GN=Lsm14b PE=1 SV=3	173.795	1	0	24.68	42310	17	6	6	6	6	20	20	13.5022	11.1179	15.7468	10.3657	10.7898	10.8819	10.9778	11.9882	15.0473	10.785	15.2839	10.2934	10.8596	11.0634	11.3406	0.169273	0.92864	67.1667	+		-0.0715748	0.846031	127			-1.52369	0.269305	96.8333	+		-1.76454	0.317593	97.3333	+
sp|Q9CYI4|LUC7L_MOUSE	Luc7l	Putative RNA-binding protein Luc7-like 1 OS=Mus musculus GN=Luc7l PE=1 SV=2	184.017	1	0	14.29	43934	20	5	1	6	1	114	19	10.5982	10.0522	12.6432	12.1323	12.4744	12.6195	10.8901	12.4772	10.4399	10.785	12.5727	11.6343	10.8596	11.0634	11.3406	0.00147141	0.998552	13	+		-1.02743	0.0944055	0	+		0.758816	0.343956	6	+		-0.270089	0.658636	7	+
sp|Q7TNC4|LC7L2_MOUSE	Luc7l2	Putative RNA-binding protein Luc7-like 2 OS=Mus musculus GN=Luc7l2 PE=1 SV=1	335.41	1	0	26.28	46583	19	9	5	12	7	224	129	16.2317	15.0387	16.9968	15.5203	16.9548	15.8756	13.8596	14.2295	15.9105	14.3624	16.3725	16.0617	16.7029	15.0484	15.2745	-0.270102	0.678063	1	+		0.445394	0.661802	8.33333	+		-0.717	0.425937	3	+		-0.0015038	0.998334	6.33333	+
sp|Q5SUF2|LC7L3_MOUSE	Luc7l3	Luc7-like protein 3 OS=Mus musculus GN=Luc7l3 PE=1 SV=1	124.982	1	0	7.18	51450	21	3	3	3	3	24	24	10.5982	10.2074	12.2789	11.0673	15.2599	13.1596	11.3645	13.622	10.3956	10.785	11.7049	10.309	15.1627	13.0864	12.2169	-0.23936	0.679357	16.5	+		0.137155	0.913238	4.5	+		2.31355	0.0453629	8.5	+	+	2.69007	0.0222308	12.5	+	+
sp|P51885|LUM_MOUSE	Lum	Lumican OS=Mus musculus GN=Lum PE=1 SV=2	124.305	1	0	8.58	38265	16	2	2	2	2	11	11	10.5982	13.4156	10.4455	10.6507	10.7898	10.8819	10.9778	11.9882	9.13483	13.6931	10.5808	10.2934	10.8596	11.0634	11.3406	-0.351933	0.780552	2			-0.0715748	0.846031	0			-0.118029	0.882682	1			0.162329	0.894022	1
sp|P17897|LYZ1_MOUSE	Lyz1	Lysozyme C-1 OS=Mus musculus GN=Lyz1 PE=1 SV=1	64.455	1	1	14.19	16794	11	2	2	2	2	43	43	14.1711	15.3647	16.5158	12.6375	15.4001	17.0396	17.3088	14.2916	14.589	14.4495	17.1868	10.9196	14.0234	17.756	15.2774	-0.386024	0.809374	4	+		-0.324424	0.804821	0	+		1.33778	0.266927	2	+		1.39938	0.466784	2	+
sp|Q91YU6|LZTS2_MOUSE	Lzts2	Leucine zipper putative tumor suppressor 2 OS=Mus musculus GN=Lzts2 PE=1 SV=3	14.783	1	0	2.38	72578	38	1	1	1	1	5	5	11.1631	9.99847	10.4426	10.6507	10.7898	10.8819	10.9778	11.9882	10.0552	10.785	10.5808	10.2934	10.8596	11.0634	11.3406	-0.135124	0.657649	1	+		-0.0715748	0.846031	0			0.595727	0.157624	0	+		0.659277	0.0314248	1
sp|P24668|MPRD_MOUSE	M6pr	Cation-dependent mannose-6-phosphate receptor OS=Mus musculus GN=M6pr PE=1 SV=1	222.128	1	0	22.66	31172	17	5	5	5	5	19	19	12.7214	16.4614	14.3317	10.6507	10.7898	10.8819	14.4594	11.9882	11.4558	14.7173	13.3833	10.2934	12.4376	14.4532	11.3406	-1.07886	0.519345	3	+		0.713964	0.597231	0	+		-1.51145	0.352026	3	+		0.281373	0.847897	0	+
sp|Q9WTX8|MD1L1_MOUSE	Mad1l1	Mitotic spindle assembly checkpoint protein MAD1 OS=Mus musculus GN=Mad1l1 PE=1 SV=1	54.732	1	0	4.46	83541	51	3	3	3	3	3	3	9.52864	9.99847	11.9113	10.6507	10.0222	10.8819	10.9778	11.9882	10.5611	9.33838	11.177	10.2934	9.80618	10.3418	11.3406	-0.17978	0.789196	2.33333	+		-0.47135	0.472401	0	+		0.445289	0.522041	1.33333	+		0.153718	0.804329	1	+
sp|Q9QYH6|MAGD1_MOUSE	Maged1	Melanoma-associated antigen D1 OS=Mus musculus GN=Maged1 PE=1 SV=1	194.113	1	0	16	85670	33	10	10	10	10	45	45	14.55	15.7914	15.383	10.6531	10.7898	10.8819	14.4917	11.9882	15.9228	15.2034	13.9585	10.2932	12.4376	14.4532	11.3406	-0.249895	0.889056	13.5	+		0.705886	0.603277	1	+		-2.05644	0.20808	9.5	+		-1.10066	0.537923	5	+
sp|Q6RHR9|MAGI1_MOUSE	Magi1	Membrane-associated guanylate kinase, WW and PDZ domain-containing protein 1 OS=Mus musculus GN=Magi1 PE=1 SV=1	18.284	1	0	1.29	161974	76	1	1	1	1	1	1	10.5982	9.99847	10.4455	10.9187	10.7898	10.8819	10.9778	11.9882	9.13483	10.785	10.5808	11.7124	10.8596	11.0634	11.3406	0.0630481	0.914991	2			-0.0715748	0.846031	0			0.669241	0.0951817	0			0.534618	0.442557	2
sp|Q9CQY5|MAGT1_MOUSE	Magt1	Magnesium transporter protein 1 OS=Mus musculus GN=Magt1 PE=1 SV=1	40.885	1	0	5.07	37970	17	2	2	2	2	2	2	10.5982	13.9902	10.4455	10.6507	10.7898	11.5517	10.9778	12.1828	9.13483	15.1913	10.5808	10.5405	11.6871	11.0634	11.3406	-0.0592674	0.971186	11	+		-0.011851	0.977575	5	+		-0.0455666	0.961822	10.3333	+		0.00184985	0.999105	5.66667	+
sp|Q9D992|MAJIN_MOUSE	Majin	Membrane-anchored junction protein OS=Mus musculus GN=Majin PE=1 SV=2	16.672	1	0	5.47	29175	14	1	1	1	1	1	1	10.5982	11.8565	10.4455	10.6507	10.7898	10.8819	11.1934	11.9882	9.13483	11.4014	11.3268	10.2934	12.3382	11.0634	11.3406	-0.348601	0.596539	2.5	+		0.36739	0.457832	0			0.325629	0.472308	1.5			1.04162	0.201153	1	+
sp|P0C6A2|MAMD1_MOUSE	Mamld1	Mastermind-like domain-containing protein 1 OS=Mus musculus GN=Mamld1 PE=3 SV=1	49.881	1	0	1.87	87598	25	1	1	1	1	4	4	10.5982	9.99847	10.6092	10.6507	10.7898	10.8819	10.9778	11.9882	10.6889	10.785	10.5808	10.2934	10.8596	11.0634	11.3406	0.12288	0.53866	19.6667			-0.0715748	0.846031	0			0.695307	0.0723654	7			0.500852	0.0330507	12.6667
sp|P14873|MAP1B_MOUSE	Map1b	Microtubule-associated protein 1B OS=Mus musculus GN=Map1b PE=1 SV=2	116.144	1	1	1.91	270255	119	3	3	3	3	15	15	13.2699	12.7925	13.4561	14.5539	10.7898	10.8819	10.9778	11.9882	14.3446	10.785	12.8312	15.6625	11.7632	11.0634	11.3406	-0.112256	0.922878	1.33333	+		0.229592	0.563451	0			-2.35865	0.00229093	0	+		-2.0168	0.167939	1.33333	+
sp|Q91VR7|MLP3A_MOUSE	Map1lc3a	Microtubule-associated proteins 1A/1B light chain 3A OS=Mus musculus GN=Map1lc3a PE=1 SV=1	25.173	2	0	5.79	14272	6	1	1	1	1	5	5	10.5982	9.99847	10.4455	16.3034	10.7898	10.8819	10.9778	11.9882	9.13483	10.785	10.5808	14.7954	10.8596	11.0634	11.3406	-0.512358	0.799067	7.5			-0.0715748	0.846031	0			-0.676926	0.671734	2			-0.236143	0.876263	5.5
sp|Q63932|MP2K2_MOUSE	Map2k2	Dual specificity mitogen-activated protein kinase kinase 2 OS=Mus musculus GN=Map2k2 PE=1 SV=2	41.836	1	0	3.49	44402	23	1	1	1	1	4	4	12.5359	9.99847	10.4455	10.6507	10.7898	10.8819	10.9778	11.9882	11.1931	10.785	10.5808	10.2934	10.8596	11.0634	11.3406	-0.194544	0.753078	4.33333			-0.0715748	0.846031	0			0.251819	0.701084	3			0.374787	0.197596	1.33333
sp|P53349|M3K1_MOUSE	Map3k1	Mitogen-activated protein kinase kinase kinase 1 OS=Mus musculus GN=Map3k1 PE=1 SV=3	17.033	1	0	0.47	161289	74	1	1	1	1	1	1	13.2708	10.789	10.4738	10.6507	10.7898	10.8819	10.9778	11.9882	11.6247	11.7552	10.5808	10.2934	10.8596	11.0634	11.3406	-0.232507	0.768989	7	+		-0.0715748	0.846031	0			-0.136607	0.855339	3	+		0.0243253	0.958987	4	+
sp|Q9ESL4|M3K20_MOUSE	Map3k20	Mitogen-activated protein kinase kinase kinase 20 OS=Mus musculus GN=Map3k20 PE=1 SV=1	47.915	1	0	6.11	91720	44	5	5	5	5	22	22	16.8525	14.5056	14.7127	10.6507	11.3376	10.8819	10.9778	11.9882	15.6412	15.1564	14.5492	12.3606	11.0879	11.0634	11.3406	0.246466	0.873196	3	+		-0.132422	0.682876	0	+		-2.88399	0.0707209	1	+		-3.26288	0.0127005	2	+
sp|O08648|M3K4_MOUSE	Map3k4	Mitogen-activated protein kinase kinase kinase 4 OS=Mus musculus GN=Map3k4 PE=1 SV=2	14.454	1	0	0.75	179834	104	1	1	1	1	2	2	10.7636	9.99847	10.4455	10.6507	10.7898	10.8819	10.9778	11.9882	8.73172	10.785	10.5808	10.2934	10.8596	11.0634	11.3406	-0.366805	0.487462	3			-0.0715748	0.846031	0			0.694904	0.0770243	1.5			0.990134	0.139519	1.5
sp|P27546|MAP4_MOUSE	Map4	Microtubule-associated protein 4 OS=Mus musculus GN=Map4 PE=1 SV=3	524.729	1	0	24.27	117429	60	18	18	21	21	75	75	15.6278	15.1075	15.6893	17.6715	11.5853	16.6268	15.8011	12.5091	13.1635	14.3497	16.007	18.1698	10.6401	13.0001	11.3406	-0.601524	0.640471	119.667	+		-2.47031	0.175917	0	+		-1.89344	0.211067	59.3333	+		-3.76223	0.0446131	60.3333	+	+
sp|P97820|M4K4_MOUSE	Map4k4	Mitogen-activated protein kinase kinase kinase kinase 4 OS=Mus musculus GN=Map4k4 PE=1 SV=1	32.768	1	0	3.97	140602	69	2	2	2	2	6	6	10.4951	9.99847	11.0248	10.6507	10.7898	10.8819	10.9778	11.9882	11.26	9.97437	10.743	10.2934	10.8596	11.0634	11.1219	0.0254117	0.944664	86.3333	+		-0.14447	0.685678	59.1667			0.617179	0.128942	78.5	+		0.447296	0.242138	67	+
sp|Q7TSJ2|MAP6_MOUSE	Map6	Microtubule-associated protein 6 OS=Mus musculus GN=Map6 PE=1 SV=2	13.244	1	0	2.43	96450	70	1	1	1	1	4	4	8.87031	9.87694	10.4455	10.4796	10.7898	10.8819	10.9778	11.9882	7.5138	10.785	10.5808	10.0969	10.8596	11.0634	11.3406	-0.173958	0.843764	1	+		-0.0715748	0.846031	0			1.24137	0.0378562	1	+		1.34375	0.197149	0	+
sp|O88735|MAP7_MOUSE	Map7	Ensconsin OS=Mus musculus GN=Map7 PE=1 SV=1	147.051	1	0	8.49	82022	36	4	4	4	4	25	25	13.7542	11.9967	13.0651	10.2902	10.7898	10.8819	10.9778	11.9882	13.1376	10.3721	13.0139	10.6513	10.8596	11.0634	11.3406	-0.482797	0.664409	1	+		-0.0715748	0.846031	0			-1.11709	0.214221	1	+		-0.705868	0.462047	0	+
sp|A2AJI0|MA7D1_MOUSE	Map7d1	MAP7 domain-containing protein 1 OS=Mus musculus GN=Map7d1 PE=1 SV=1	140.058	1	0	9.1	93276	46	6	6	6	6	27	27	12.2386	11.7778	12.6968	11.2951	17.7504	10.8819	10.9778	11.9882	13.3055	12.2219	11.4713	12.3811	20.8023	11.0634	11.3406	0.342853	0.503831	10	+		1.50247	0.668418	0			0.897518	0.608979	4.33333	+		2.05714	0.482803	5.66667	+
sp|A2AG50|MA7D2_MOUSE	Map7d2	MAP7 domain-containing protein 2 OS=Mus musculus GN=Map7d2 PE=1 SV=1	27.81	1	0	2.56	86050	46	1	1	1	1	4	4	10.5982	7.63988	9.88068	10.6507	10.7898	10.8819	10.9778	11.9882	7.24487	10.785	10.0105	9.57917	10.8596	11.0634	11.3406	-0.287477	0.791308	4	+		-0.0715748	0.846031	0			1.4671	0.10158	2	+		1.683	0.123347	2	+
sp|P63085|MK01_MOUSE	Mapk1	Mitogen-activated protein kinase 1 OS=Mus musculus GN=Mapk1 PE=1 SV=3	34.291	1	9	4.75	41276	24	2	2	2	2	6	6	12.53	12.7509	13.8543	10.6507	10.7898	10.8819	10.9778	11.9882	13.7931	13.4765	14.3599	11.3867	10.8596	11.0634	11.3406	0.807587	0.418089	23	+		-0.0715748	0.846031	1			-1.28703	0.124548	7.5	+		-2.16619	0.038438	16.5	+	+
sp|Q80Y86|MK15_MOUSE	Mapk15	Mitogen-activated protein kinase 15 OS=Mus musculus GN=Mapk15 PE=1 SV=1	18.169	1	0	1.46	60679	34	1	1	1	1	1	1	11.7528	9.99847	13.4588	10.6507	10.7898	10.8819	10.9778	11.9882	13.3054	10.785	13.1871	11.3867	10.8596	11.0634	11.3406	0.70084	0.504958	45.1667	+		-0.0715748	0.846031	0			-0.305748	0.717667	6.5	+		-1.07816	0.21604	38.6667	+
sp|Q922Q1|MARC2_MOUSE	Marc2	Mitochondrial amidoxime reducing component 2 OS=Mus musculus GN=Marc2 PE=1 SV=1	102.013	1	0	12.13	38194	20	5	5	5	5	13	13	11.0453	14.6223	10.4455	10.6507	10.7898	10.8819	10.9778	11.9882	10.1678	15.5185	10.5808	10.2934	10.8596	11.0634	11.3406	-0.0507671	0.976128	1	+		-0.0715748	0.846031	0			-0.531472	0.622244	1	+		-0.552279	0.734111	0	+
sp|P28667|MRP_MOUSE	Marcksl1	MARCKS-related protein OS=Mus musculus GN=Marcksl1 PE=1 SV=2	64.369	1	0	14	20165	8	2	2	2	2	18	18	11.6894	12.2334	13.3243	11.7975	10.7898	11.3472	10.9778	11.9882	10.6894	12.7481	13.0456	11.3339	10.8596	11.0634	11.3406	-0.306905	0.665649	2.33333	+		-0.187897	0.597638	0			-0.985391	0.0746568	1.33333	+		-0.866382	0.256476	1	+
sp|Q05512|MARK2_MOUSE	Mark2	Serine/threonine-protein kinase MARK2 OS=Mus musculus GN=Mark2 PE=1 SV=3	47.591	1	0	4.51	86306	49	2	2	2	2	7	7	11.0348	11.8445	11.6197	10.6507	10.7898	12.1505	13.2531	11.9882	10.8192	11.8103	12.623	10.2934	11.7458	12.8778	11.3406	0.099073	0.871216	1	+		-0.0573431	0.93875	0	+		0.757993	0.234042	1	+		0.601577	0.443973	0	+
sp|Q03141|MARK3_MOUSE	Mark3	MAP/microtubule affinity-regulating kinase 3 OS=Mus musculus GN=Mark3 PE=1 SV=2	70.756	1	0	3.85	84390	47	2	2	2	2	5	5	12.1403	11.4903	12.0068	11.9657	10.7898	10.8819	10.9778	11.9882	10.155	12.0663	12.4704	12.4568	10.8596	11.0634	11.3406	-0.113667	0.848516	22	+		-0.0715748	0.846031	0			-0.741326	0.055572	11.8333	+		-0.699234	0.3402	10.1667	+
sp|Q8K310|MATR3_MOUSE	Matr3	Matrin-3 OS=Mus musculus GN=Matr3 PE=1 SV=1	218.438	1	0	10.28	94630	45	6	6	7	7	25	25	18.56	18.723	20.3283	18.7465	19.0651	21.5096	18.1227	19.4742	15.6443	18.0035	20.3153	18.2579	18.5607	20.3901	18.371	-1.03418	0.359314	10	+		-0.435644	0.681833	0	+		0.453459	0.602781	5	+		1.05199	0.43933	5	+
sp|Q9JKP5|MBNL1_MOUSE	Mbnl1	Muscleblind-like protein 1 OS=Mus musculus GN=Mbnl1 PE=1 SV=1	70.703	1	1	14.66	36976	12	4	1	6	1	12	3	12.2674	11.8412	14.5547	10.6507	10.7898	10.8819	10.9778	11.9882	13.688	12.8662	13.5671	10.2934	10.8596	11.0634	11.3406	0.275204	0.816859	3.5	+		-0.0715748	0.846031	0			-1.16903	0.224521	3.5	+		-1.5158	0.168973	0	+
sp|Q8C181|MBNL2_MOUSE	Mbnl2	Muscleblind-like protein 2 OS=Mus musculus GN=Mbnl2 PE=2 SV=2	78.385	1	0	14.48	40156	14	4	1	6	1	10	1	10.8725	9.99847	10.4909	10.6507	10.7898	10.8819	10.9778	11.9882	11.4459	9.68988	10.1042	10.2934	10.8596	11.0634	11.3406	-0.119785	0.784697	1	+		-0.0715748	0.846031	0			0.656291	0.0978066	0	+		0.704501	0.186088	1	+
sp|Q8CHK3|MBOA7_MOUSE	Mboat7	Lysophospholipid acyltransferase 7 OS=Mus musculus GN=Mboat7 PE=1 SV=1	26.45	1	0	2.54	53436	18	1	1	1	1	1	1	10.5982	11.0354	10.4455	10.6507	10.7898	10.8819	10.9778	11.9882	11.8659	11.4562	11.3666	10.2934	10.8596	11.0634	12.8417	0.563118	0.166937	13	+		0.428796	0.520954	0			0.477026	0.169822	3.33333	+		0.342704	0.625482	9.66667	+
sp|Q8R2Y2|MUC18_MOUSE	Mcam	Cell surface glycoprotein MUC18 OS=Mus musculus GN=Mcam PE=1 SV=1	110.965	1	0	9.88	71545	34	5	5	5	5	13	13	9.64429	15.1975	10.4455	10.6507	10.7898	10.8819	10.9778	11.9882	8.90841	13.8012	10.5808	10.2934	10.8596	11.0634	11.3406	-0.588532	0.730095	0	+		-0.0715748	0.846031	5			-0.325038	0.809065	2	+		0.191919	0.88212	3	+
sp|P25206|MCM3_MOUSE	Mcm3	DNA replication licensing factor MCM3 OS=Mus musculus GN=Mcm3 PE=1 SV=2	184.954	1	0	13.42	91546	53	7	7	7	7	12	12	13.9635	15.3304	11.9431	12.7994	10.7898	13.6503	13.1041	15.1359	13.7015	15.4768	13.2115	14.3653	12.2559	13.978	17.2584	0.679642	0.470822	12.8333	+		1.3274	0.451614	0	+		-0.339083	0.780532	5	+		0.308674	0.829153	7.83333	+
sp|P49718|MCM5_MOUSE	Mcm5	DNA replication licensing factor MCM5 OS=Mus musculus GN=Mcm5 PE=1 SV=1	340.213	1	0	22.51	82343	49	14	14	14	14	66	66	16.7139	16.7084	14.5549	14.6818	10.8962	13.3599	10.9778	13.9764	17.2519	16.3959	14.7429	14.5803	11.2769	11.0634	16.3158	0.0780148	0.932781	6	+		0.582771	0.748368	0	+		-3.36214	0.0152953	3	+		-2.85739	0.139681	3	+
sp|Q8R3C0|MCMBP_MOUSE	Mcmbp	Mini-chromosome maintenance complex-binding protein OS=Mus musculus GN=Mcmbp PE=1 SV=1	29.848	1	0	1.71	72891	37	1	1	1	1	1	1	10.6578	9.99847	10.4455	10.6507	10.7898	11.6357	10.9778	12.4422	9.48865	10.785	10.5808	10.8954	12.2233	11.0634	11.7664	-0.000621026	0.998672	1	+		0.22296	0.688562	0	+		1.0233	0.0447106	1	+		1.24688	0.0468195	0	+
sp|Q9CQB2|MCRI2_MOUSE	Mcrip2	MAPK regulated corepressor interacting protein 2 OS=Mus musculus GN=Mcrip2 PE=1 SV=1	44.926	1	0	22.5	17871	9	2	2	2	2	9	9	11.8356	9.99847	13.1743	10.6507	10.7898	10.8819	10.9778	11.9882	12.9771	10.785	11.5225	10.2934	10.8596	11.0634	11.3406	-0.0202674	0.982979	8.66667	+		-0.0715748	0.846031	0			-0.255311	0.74598	0	+		-0.306619	0.680393	8.66667	+
sp|Q5PSV9|MDC1_MOUSE	Mdc1	Mediator of DNA damage checkpoint protein 1 OS=Mus musculus GN=Mdc1 PE=1 SV=1	12.266	1	0	0.76	184670	77	1	1	1	1	1	1	10.5982	9.99847	10.4455	10.6507	12.2962	10.8819	10.9778	11.7915	9.13483	10.785	10.5808	10.2934	11.7915	11.0634	11.3406	-0.224678	0.592191	12			-0.0883699	0.847996	0	+		1.06367	0.0280346	3.66667	+		1.19998	0.0513729	8.33333
sp|P14152|MDHC_MOUSE	Mdh1	Malate dehydrogenase, cytoplasmic OS=Mus musculus GN=Mdh1 PE=1 SV=3	338.88	1	0	48.8	36511	21	13	13	13	13	141	141	17.4216	16.7734	17.8438	18.8255	12.6565	16.8893	15.1111	15.7514	16.0473	16.7823	17.2384	17.8038	13.5373	15.3652	16.8278	-0.748114	0.236143	2	+		0.141397	0.919123	0	+		-2.614	0.038856	1	+		-1.72448	0.116441	1	+
sp|P08249|MDHM_MOUSE	Mdh2	Malate dehydrogenase, mitochondrial OS=Mus musculus GN=Mdh2 PE=1 SV=3	510.798	1	0	45.56	35611	24	12	12	14	14	75	75	11.7416	18.8182	15.062	14.0602	12.8044	14.761	12.6322	15.1612	16.6312	17.8046	15.1781	16.3065	13.2886	16.0636	14.507	1.55965	0.358727	19	+		0.780073	0.480708	0	+		-1.08081	0.527505	10.5	+		-1.86039	0.101153	8.5	+
sp|Q99KE1|MAOM_MOUSE	Me2	NAD-dependent malic enzyme, mitochondrial OS=Mus musculus GN=Me2 PE=1 SV=1	92.291	1	0	4.92	65799	33	2	2	2	2	5	5	10.5982	13.1745	10.4455	10.6507	10.7898	10.8819	10.9778	11.9882	9.13483	12.8539	10.5808	10.2934	10.8596	12.1879	11.3406	-0.501464	0.639308	1			0.303277	0.541446	0			-0.0577652	0.93788	0			0.746975	0.478801	1
sp|Q8CFN5|MEF2C_MOUSE	Mef2c	Myocyte-specific enhancer factor 2C OS=Mus musculus GN=Mef2c PE=1 SV=2	37.404	1	2	5.27	51278	20	2	2	2	2	6	6	10.5982	10.6478	13.8498	10.2343	10.8188	10.8819	10.9778	11.9882	12.5532	10.785	13.6854	9.94965	10.6916	11.0634	11.3406	0.410813	0.742583	3	+		-0.134854	0.724954	0			-0.165818	0.858032	2	+		-0.711485	0.513338	1	+
sp|Q61846|MELK_MOUSE	Melk	Maternal embryonic leucine zipper kinase OS=Mus musculus GN=Melk PE=1 SV=2	66.244	1	0	5.6	72729	37	2	2	3	3	9	9	10.5982	9.99847	10.4455	10.6507	10.7898	10.8819	10.9778	11.9882	12.2872	10.785	10.5808	10.2934	10.8596	11.0634	11.3406	0.563415	0.274983	2			-0.0715748	0.846031	0			0.736253	0.0585291	1			0.101263	0.858469	1
sp|Q8K3A9|MEPCE_MOUSE	Mepce	7SK snRNA methylphosphate capping enzyme OS=Mus musculus GN=Mepce PE=1 SV=2	16.099	1	0	3.75	72050	35	1	1	1	1	3	3	10.1799	9.99847	9.68934	9.78145	10.7898	10.8819	10.9778	11.9882	8.25188	10.785	8.65727	8.71658	10.8596	11.0634	11.3406	-0.809619	0.212736	1	+		-0.0715748	0.846031	0			1.24715	0.00595532	0	+		1.9852	0.0338104	1	+
sp|C0HKD8|MFA1A_MOUSE	Mfap1a	Microfibrillar-associated protein 1A OS=Mus musculus GN=Mfap1a PE=1 SV=1	58.844	2	0	6.38	51954	20	3	3	3	3	22	22	13.0532	10.6107	11.704	10.6507	14.9562	11.8749	12.7237	12.4522	10.4117	11.551	11.9565	10.0192	14.4593	13.3606	10.857	-0.520041	0.506061	1	+		-0.109418	0.930731	0	+		1.49709	0.142312	1	+		1.90771	0.127214	0	+
sp|P21956|MFGM_MOUSE	Mfge8	Lactadherin OS=Mus musculus GN=Mfge8 PE=1 SV=3	103.339	1	0	9.07	51241	23	3	3	3	3	8	8	10.5982	14.3833	10.4455	10.6507	10.7898	10.8819	10.9778	11.9882	9.13483	14.2983	10.5808	10.2934	10.8596	11.0634	11.3406	-0.442579	0.773674	22.6667			-0.0715748	0.846031	0			-0.359967	0.730049	8.5			0.0110372	0.993692	14.1667
sp|O35678|MGLL_MOUSE	Mgll	Monoglyceride lipase OS=Mus musculus GN=Mgll PE=1 SV=1	65.917	1	0	15.18	33388	19	4	4	4	4	5	5	15.4162	9.99847	13.0874	15.4747	10.7898	10.8819	11.483	13.8823	14.6328	11.4651	10.5808	14.6942	10.8596	11.0634	13.662	-0.650957	0.710887	11.8333	+		0.102414	0.932013	2.66667	+		-1.73494	0.28561	5.83333	+		-0.981568	0.533953	8.66667	+
sp|P19788|MGP_MOUSE	Mgp	Matrix Gla protein OS=Mus musculus GN=Mgp PE=3 SV=1	75.024	1	0	21.15	12359	4	2	2	3	3	11	11	11.3106	12.9525	10.4455	10.6507	11.7171	11.0203	12.5291	11.9882	10.1574	14.779	10.5808	10.2934	11.3232	13.9423	11.2201	0.11285	0.930952	6.66667	+		0.348189	0.693148	0	+		0.473885	0.492921	2.33333	+		0.709223	0.658851	4.33333	+
sp|Q9D074|MGRN1_MOUSE	Mgrn1	E3 ubiquitin-protein ligase MGRN1 OS=Mus musculus GN=Mgrn1 PE=1 SV=2	19.418	1	0	3.01	58477	26	1	1	1	1	4	4	10.2026	9.99847	10.4455	10.6507	10.7898	10.8819	10.9778	11.9882	8.99796	10.785	10.5808	10.2934	10.8596	11.0634	11.3406	-0.159998	0.720161	8.83333			-0.0715748	0.846031	0			0.835151	0.0371174	2.66667			0.923574	0.117744	6.16667
sp|Q3TN34|MILK2_MOUSE	Micall2	MICAL-like protein 2 OS=Mus musculus GN=Micall2 PE=1 SV=1	37.208	1	0	4.66	108288	69	3	3	3	3	5	5	13.6659	10.3671	14.8619	10.6507	11.988	9.99008	9.81132	11.9882	11.0332	11.4608	13.956	8.84789	13.7562	10.6226	11.3406	-1.06191	0.513076	4	+		0.96208	0.408665	0	+		-1.44199	0.298074	2	+		0.582001	0.708713	2	+
sp|E9PVX6|KI67_MOUSE	Mki67	Proliferation marker protein Ki-67 OS=Mus musculus GN=Mki67 PE=1 SV=1	43.853	1	0	0.91	350864	178	2	2	2	2	4	4	10.5982	10.3976	10.4455	10.6507	12.4528	11.4668	10.9778	11.9882	9.79495	11.1559	10.5808	10.2934	10.8698	11.2197	11.3406	-0.066709	0.825991	6.5	+		-0.57809	0.204065	0	+		1.19845	0.0102399	2.5	+		0.687067	0.111763	4	+
sp|P59759|MKL2_MOUSE	Mkl2	MKL/myocardin-like protein 2 OS=Mus musculus GN=Mkl2 PE=1 SV=1	13.627	1	0	1.02	117547	41	1	1	1	1	1	1	12.4065	9.99847	10.4455	10.6507	10.7898	10.8819	10.9778	11.9882	12.0808	10.785	10.5808	10.2934	10.8596	11.0634	11.3406	0.0597226	0.930803	6			-0.0715748	0.846031	0			0.28417	0.651111	3			0.152873	0.763796	3
sp|Q9ERV1|MKRN2_MOUSE	Mkrn2	Probable E3 ubiquitin-protein ligase makorin-2 OS=Mus musculus GN=Mkrn2 PE=1 SV=2	10.112	1	0	2.88	46597	28	1	1	1	1	1	1	10.7237	10.4467	10.9097	10.6507	10.7898	10.8819	10.9778	11.9882	13.0129	10.785	10.6216	10.2934	11.508	11.0634	11.3406	0.495544	0.459667	4	+		0.144545	0.694595	0			0.476761	0.157043	3	+		0.125762	0.871987	1	+
sp|Q6ZQI3|MLEC_MOUSE	Mlec	Malectin OS=Mus musculus GN=Mlec PE=1 SV=2	205.636	1	0	25.77	32342	18	6	6	6	6	27	27	10.7108	16.1363	10.4455	10.6455	10.7898	10.5688	12.1904	12.188	9.63676	16.2781	11.6987	13.5082	11.42	12.4016	13.2902	0.795923	0.701007	6	+		0.936336	0.23152	0	+		-0.55024	0.717908	1	+		-0.409827	0.821844	5	+
sp|Q9QWV4|MLF1_MOUSE	Mlf1	Myeloid leukemia factor 1 OS=Mus musculus GN=Mlf1 PE=1 SV=1	13.599	1	0	3	30432	16	1	1	1	1	6	6	14.418	12.0848	13.0257	11.581	11.1126	13.6835	14.0348	11.9882	13.6335	13.7474	12.6346	11.0001	12.1331	13.4236	12.0566	-0.0234775	0.979821	4	+		-0.167073	0.860151	0	+		-0.0725845	0.940502	0	+		-0.21618	0.80689	4	+
sp|Q9DCJ1|LST8_MOUSE	Mlst8	Target of rapamycin complex subunit LST8 OS=Mus musculus GN=Mlst8 PE=1 SV=1	11.619	1	0	5.52	35851	17	1	1	1	1	1	1	10.5982	9.99847	10.4455	10.6507	10.7898	10.8819	10.9778	11.9882	11.8341	10.785	10.5808	10.2934	10.8596	11.0634	11.3406	0.450145	0.265904	1			-0.0715748	0.846031	0			0.736253	0.0585291	1			0.214533	0.626452	0
sp|Q8K273|MMGT1_MOUSE	Mmgt1	Membrane magnesium transporter 1 OS=Mus musculus GN=Mmgt1 PE=1 SV=1	39.481	1	0	18.32	14677	6	1	1	1	1	3	3	10.5982	12.4289	10.4455	10.6507	10.7898	10.8819	10.9778	11.9882	9.13483	10.785	10.5808	10.2934	10.8596	11.0634	11.3406	-0.832274	0.211908	3			-0.0715748	0.846031	0			0.128657	0.821184	1			0.889357	0.105937	2
sp|Q9D071|MMS19_MOUSE	Mms19	MMS19 nucleotide excision repair protein homolog OS=Mus musculus GN=Mms19 PE=1 SV=1	47.635	1	0	2.62	113089	55	2	2	2	2	6	6	14.2215	9.99847	10.4455	10.6507	10.7898	10.8819	10.9778	11.9882	11.5441	11.045	10.5808	10.2934	10.8596	11.0634	11.3406	-0.463167	0.663154	5.83333	+		-0.0715748	0.846031	0			-0.169579	0.872539	2.5			0.222014	0.547753	3.33333	+
sp|Q8BPB0|MOB1B_MOUSE	Mob1b	MOB kinase activator 1B OS=Mus musculus GN=Mob1b PE=1 SV=3	47.572	2	0	5.56	25091	10	1	1	1	1	7	7	14.1731	9.74762	10.7475	10.7746	11.8585	11.171	10.9778	11.9882	12.0135	11.111	10.5808	10.7393	10.8596	11.6521	11.3406	-0.249543	0.814735	1	+		-0.214775	0.569221	0	+		0.1382	0.894511	1	+		0.172969	0.701256	0	+
sp|Q8BSU7|MOB3A_MOUSE	Mob3a	MOB kinase activator 3A OS=Mus musculus GN=Mob3a PE=1 SV=1	10.586	1	0	5.53	25552	13	1	1	1	1	1	1	10.5982	13.9007	10.4455	10.6507	10.782	12.5142	10.8711	12.2152	11.147	14.0101	10.4211	10.2934	11.1982	11.9518	11.3406	0.0691614	0.956076	4	+		-0.0987422	0.868096	0	+		0.196877	0.842344	2	+		0.0289729	0.978956	2	+
sp|Q80UM7|MOGS_MOUSE	Mogs	Mannosyl-oligosaccharide glucosidase OS=Mus musculus GN=Mogs PE=1 SV=1	13.305	1	0	1.08	91831	41	1	1	1	1	1	1	10.5982	12.333	10.4455	10.6507	10.7898	10.8819	10.9778	11.9882	9.13483	12.4344	10.5808	10.2934	10.8596	11.0634	11.3406	-0.395972	0.644357	6.83333			-0.0715748	0.846031	0			0.152611	0.780877	4.16667			0.477008	0.584689	2.66667
sp|P97434|MPRIP_MOUSE	Mprip	Myosin phosphatase Rho-interacting protein OS=Mus musculus GN=Mprip PE=1 SV=2	14.291	1	0	1.76	116408	63	1	1	1	1	2	2	10.6409	9.99847	9.95319	10.6507	10.7898	10.8819	10.9778	11.9882	8.40492	10.785	10.5808	10.2934	10.8596	11.0634	11.3406	-0.294781	0.629259	5	+		-0.0715748	0.846031	6			0.848628	0.0465689	5	+		1.07183	0.163715	6
sp|Q9CQL7|MOFA1_MOUSE	Mrfap1	MORF4 family-associated protein 1 OS=Mus musculus GN=Mrfap1 PE=1 SV=1	44.161	1	0	18.4	14194	5	1	1	1	1	7	7	11.613	9.99847	14.5603	14.5478	14.1019	10.8819	10.9778	19.9469	11.7645	10.785	13.0029	10.2934	10.8596	11.0634	18.4581	-1.21842	0.377702	8	+		-0.516764	0.880656	0	+		1.29725	0.60947	6.5	+		1.99891	0.406751	1.5	+
sp|Q9DB15|RM12_MOUSE	Mrpl12	39S ribosomal protein L12, mitochondrial OS=Mus musculus GN=Mrpl12 PE=1 SV=2	119.389	1	0	36.32	21708	9	6	6	6	6	18	18	10.5982	14.9575	10.4455	10.6507	10.7898	10.8819	10.9778	11.9882	10.1555	15.8107	10.5808	10.2934	10.8596	11.0634	11.3406	0.0471452	0.979453	3.83333	+		-0.0715748	0.846031	0			-0.503512	0.672568	1.5			-0.622232	0.7175	2.33333	+
sp|Q99N90|RM36_MOUSE	Mrpl36	39S ribosomal protein L36, mitochondrial OS=Mus musculus GN=Mrpl36 PE=3 SV=1	21.254	1	0	6.86	11545	7	1	1	1	1	1	1	12.9624	11.5743	13.1612	12.9867	12.7895	16.336	15.2863	13.5203	10.0327	13.7467	14.8529	13.5838	14.8418	15.0872	13.0943	0.382888	0.741635	1	+		-0.141919	0.901732	0	+		1.8119	0.0879012	0	+		1.28709	0.382272	1	+
sp|Q8R035|ICT1_MOUSE	Mrpl58	Peptidyl-tRNA hydrolase ICT1, mitochondrial OS=Mus musculus GN=Mrpl58 PE=1 SV=1	21.49	1	0	5.83	23477	15	1	1	1	1	1	1	10.5982	11.5356	10.4455	10.6507	10.7898	10.8819	10.9778	11.9882	9.13483	13.0596	10.5808	10.2934	11.6776	11.0634	11.3406	-0.04031	0.964203	1			0.201073	0.602441	0			0.351974	0.380924	0			0.593357	0.574337	1
sp|Q99N84|RT18B_MOUSE	Mrps18b	28S ribosomal protein S18b, mitochondrial OS=Mus musculus GN=Mrps18b PE=1 SV=1	19.156	1	0	7.09	28703	12	2	2	2	2	2	2	10.8127	9.65459	10.4455	12.6416	10.7898	10.8819	10.9778	11.4685	9.13483	13.5645	10.5808	12.2428	10.8596	11.0634	12.9772	0.492134	0.684772	0	+		0.603876	0.354487	3			0.140913	0.835598	2	+		0.252655	0.850678	1	+
sp|Q8VE22|RT23_MOUSE	Mrps23	28S ribosomal protein S23, mitochondrial OS=Mus musculus GN=Mrps23 PE=1 SV=1	34.605	1	0	10.73	20348	11	1	1	1	1	4	4	10.5982	11.9757	10.4455	10.6507	10.7898	10.8819	10.9778	11.9882	9.13483	12.35	10.5808	10.2934	10.8596	11.0634	11.3406	-0.327721	0.678949	1			-0.0715748	0.846031	0			0.241946	0.611536	0			0.498092	0.558544	1
sp|Q9JIK9|RT34_MOUSE	Mrps34	28S ribosomal protein S34, mitochondrial OS=Mus musculus GN=Mrps34 PE=1 SV=1	20.144	1	0	6.42	25827	15	1	1	1	1	3	3	10.5982	11.2544	10.4455	10.6507	10.7898	10.8819	10.9778	11.9882	9.13483	11.7908	10.5808	10.2934	10.8596	11.0634	11.3406	-0.287197	0.63443	4			-0.0715748	0.846031	0			0.42228	0.248902	1.5			0.637902	0.375328	2.5
sp|Q80X85|RT07_MOUSE	Mrps7	28S ribosomal protein S7, mitochondrial OS=Mus musculus GN=Mrps7 PE=1 SV=1	46.203	1	0	4.96	28063	19	1	1	1	1	4	4	10.5982	10.9325	10.4455	10.6507	10.7898	10.8819	10.9778	11.9882	9.13483	11.8126	10.5808	10.2934	10.8596	11.0634	11.3406	-0.201272	0.731215	7.66667			-0.0715748	0.846031	0			0.502753	0.141306	5			0.632451	0.38257	2.66667
sp|Q9D7N3|RT09_MOUSE	Mrps9	28S ribosomal protein S9, mitochondrial OS=Mus musculus GN=Mrps9 PE=1 SV=3	35.066	1	0	3.08	44929	30	1	1	1	1	3	3	10.5982	9.25596	10.4455	10.6507	10.9717	10.8819	10.9778	11.9882	9.13483	10.7086	10.5808	10.2934	10.8596	11.0634	11.3406	-0.0581503	0.908959	1			-0.117056	0.738201	0			0.967361	0.0614878	1			0.908456	0.0940543	0
sp|Q9D0I8|MRT4_MOUSE	Mrto4	mRNA turnover protein 4 homolog OS=Mus musculus GN=Mrto4 PE=1 SV=1	87.135	1	0	20.92	27546	17	4	4	4	4	12	12	10.5836	13.5306	14.3571	14.2182	11.4559	10.8819	10.9778	11.9882	12.4239	11.7434	13.9217	15.8956	13.0105	11.0634	11.3406	0.323772	0.807925	4.83333	+		0.47885	0.454537	5			-1.84641	0.090845	2	+		-1.69133	0.218332	7.83333	+
sp|Q920Q6|MSI2H_MOUSE	Msi2	RNA-binding protein Musashi homolog 2 OS=Mus musculus GN=Msi2 PE=1 SV=1	108.567	1	0	12.14	36939	13	3	3	3	3	8	8	10.5982	12.933	10.4455	10.6507	10.7898	11.6353	10.9778	11.9882	14.3937	10.2444	10.5808	12.1273	10.7483	11.1796	12.7686	0.679751	0.565036	2	+		0.217697	0.736368	0	+		0.190968	0.780893	1			-0.271086	0.834479	1	+
sp|P26041|MOES_MOUSE	Msn	Moesin OS=Mus musculus GN=Msn PE=1 SV=3	228.713	1	0	20.62	67767	39	12	6	14	7	43	10	10.6969	14.8124	13.1762	13.6858	11.6016	13.3747	11.9795	11.9882	13.0934	14.2751	11.8207	14.9995	10.8709	11.5938	11.7065	0.454332	0.697446	3	+		-0.84559	0.158815	7.33333	+		-0.856826	0.40291	1.33333	+		-2.15675	0.0526344	9	+
sp|Q2YDW2|MSTO1_MOUSE	Msto1	Protein misato homolog 1 OS=Mus musculus GN=Msto1 PE=1 SV=1	112.447	1	0	10.61	61230	35	5	5	5	5	21	21	14.6484	13.6232	12.0392	13.0166	10.7898	10.8819	10.9778	11.9882	13.3277	13.6916	12.6257	10.2934	10.8596	11.0634	11.3406	-0.847258	0.401599	175.667	+		-0.0715748	0.846031	112			-2.17242	0.0122357	140.333	+	+	-1.39673	0.185594	147.333	+
sp|Q9R190|MTA2_MOUSE	Mta2	Metastasis-associated protein MTA2 OS=Mus musculus GN=Mta2 PE=1 SV=1	26.722	1	0	2.4	75030	53	1	1	1	1	4	4	11.8851	9.99847	10.5205	10.6507	11.0723	11.3339	10.9778	11.9882	10.8983	11.3819	11.2021	10.2934	12.3348	11.3123	11.3406	0.180255	0.711865	5	+		0.319481	0.449532	9.83333	+		0.579417	0.25449	10	+		0.718643	0.131263	4.83333	+
sp|Q9CQ65|MTAP_MOUSE	Mtap	S-methyl-5'-thioadenosine phosphorylase OS=Mus musculus GN=Mtap PE=1 SV=1	361.363	1	0	47	31062	19	10	10	12	12	63	63	14.6648	15.4547	17.5131	18.4394	13.1913	11.4175	13.5081	11.9882	15.1963	14.7568	17.1498	17.8766	10.8596	13.9094	13.0363	-0.273148	0.821105	1	+		0.0754854	0.940223	0	+		-3.99171	0.00742323	0	+		-3.64308	0.0264208	1	+
sp|Q791T5|MTCH1_MOUSE	Mtch1	Mitochondrial carrier homolog 1 OS=Mus musculus GN=Mtch1 PE=1 SV=1	31.836	1	0	2.83	41565	19	1	1	1	1	3	3	10.5982	12.6502	10.4455	10.6507	10.7898	10.8819	10.9778	11.9882	9.64041	12.9975	10.5808	10.2934	10.8596	11.0634	11.3406	-0.208072	0.825013	7.5	+		-0.0715748	0.846031	0			0.0733249	0.905609	3			0.209822	0.820119	4.5	+
sp|Q791V5|MTCH2_MOUSE	Mtch2	Mitochondrial carrier homolog 2 OS=Mus musculus GN=Mtch2 PE=1 SV=1	48.265	1	0	11.88	33499	15	3	3	3	3	4	4	10.5982	12.3657	10.4455	10.6507	10.7898	10.8819	10.9778	11.9882	9.13483	13.594	10.5808	10.2934	10.8596	11.0634	11.3406	-0.114236	0.917125	1			-0.0715748	0.846031	0			0.144442	0.79488	0			0.187103	0.87506	1
sp|P00405|COX2_MOUSE	Mtco2	Cytochrome c oxidase subunit 2 OS=Mus musculus GN=Mtco2 PE=1 SV=1	47.805	1	0	16.3	25976	8	3	3	3	3	6	6	12.589	17.2689	11.3853	10.6507	14.6137	13.6809	12.5366	11.9882	13.2011	17.4472	13.3886	10.2934	13.8149	13.9945	10.8004	0.60913	0.780594	47.8333	+		-0.334911	0.775196	0	+		0.231375	0.889638	17.5	+		-0.712667	0.728863	30.3333	+
sp|Q9CWE0|MFR1L_MOUSE	Mtfr1l	Mitochondrial fission regulator 1-like OS=Mus musculus GN=Mtfr1l PE=1 SV=1	38.122	1	0	5.54	31726	14	1	1	1	1	1	1	10.5982	9.94875	10.4455	10.6507	10.7898	10.8819	10.9778	11.9882	11.1245	11.0215	10.5808	10.2934	10.8596	11.0634	11.3406	0.344306	0.219839	8.33333	+		-0.0715748	0.846031	0			0.748684	0.0587811	1			0.332803	0.252407	7.33333	+
sp|Q922D8|C1TC_MOUSE	Mthfd1	C-1-tetrahydrofolate synthase, cytoplasmic OS=Mus musculus GN=Mthfd1 PE=1 SV=4	172.789	1	0	11.87	101200	56	12	12	12	12	53	53	17.5898	14.7888	12.3213	16.2735	16.6045	14.8231	13.1666	15.5036	15.9594	14.9865	12.1762	14.2998	14.7888	12.644	11.3406	-0.887886	0.545303	27.1667	+		-2.09998	0.139741	0	+		-0.218908	0.875547	11.5	+		-1.431	0.310382	15.6667	+
sp|Q3V3R1|C1TM_MOUSE	Mthfd1l	Monofunctional C1-tetrahydrofolate synthase, mitochondrial OS=Mus musculus GN=Mthfd1l PE=1 SV=2	20.921	1	0	2.15	105729	58	2	2	2	2	4	4	10.5982	10.7162	10.4455	10.6507	10.7898	10.8819	10.9778	11.9882	9.13483	12.0895	10.5808	10.2934	10.8596	11.0634	11.3406	-0.0779645	0.902603	6			-0.0715748	0.846031	0			0.556828	0.0983657	4			0.563218	0.474611	2
sp|P03911|NU4M_MOUSE	Mtnd4	NADH-ubiquinone oxidoreductase chain 4 OS=Mus musculus GN=Mtnd4 PE=1 SV=1	58.197	1	0	8.28	51882	13	2	2	3	3	3	3	10.5982	10.527	10.4455	10.6507	10.7898	10.8819	10.9778	11.9882	9.13483	10.785	10.5808	10.2934	10.8596	11.0634	11.3406	-0.356815	0.373666	2			-0.0715748	0.846031	0			0.604117	0.0762675	2			0.889357	0.105937	0
sp|Q9JLN9|MTOR_MOUSE	Mtor	Serine/threonine-protein kinase mTOR OS=Mus musculus GN=Mtor PE=1 SV=2	25.674	1	0	0.75	288789	152	2	2	2	2	2	2	14.2063	9.99847	10.4455	10.6507	10.7898	10.8819	10.9778	11.9882	12.1727	10.6971	10.5808	10.2934	10.8596	11.0634	11.3406	-0.38923	0.72542	25.5	+		-0.0715748	0.846031	0			-0.165784	0.87492	6			0.151871	0.778448	19.5	+
sp|Q8R1S4|MTSS1_MOUSE	Mtss1	Metastasis suppressor protein 1 OS=Mus musculus GN=Mtss1 PE=1 SV=1	107.3	1	0	11.2	82408	40	6	6	6	6	25	25	15.2441	12.6536	15.2995	11.6996	10.8071	10.8819	11.3765	11.9882	15.6404	13.1469	14.4239	11.823	12.2568	14.8921	11.3406	0.0343477	0.97862	13.1667	+		1.5664	0.159106	2.66667	+		-2.46078	0.0418485	10.5	+	+	-0.928726	0.512676	5.33333	+
sp|O88441|MTX2_MOUSE	Mtx2	Metaxin-2 OS=Mus musculus GN=Mtx2 PE=1 SV=1	55.027	1	0	22.81	29758	12	3	3	3	3	9	9	10.6151	13.1001	10.4455	10.6507	10.7885	11.4856	10.9778	11.9882	9.13483	13.9819	10.5808	10.2934	10.8596	11.0634	11.3406	-0.205098	0.872047	2.5	+		-0.222152	0.542129	0	+		0.107195	0.881469	1	+		0.0901407	0.944831	1.5
sp|P28665|MUG1_MOUSE	Mug1	Murinoglobulin-1 OS=Mus musculus GN=Mug1 PE=1 SV=3	611.626	1	2	22.9	165298	79	23	23	26	26	190	190	17.7438	17.7083	17.8981	19.072	16.5022	18.2225	18.3469	17.4458	16.5765	17.1059	17.9825	18.2161	17.515	18.5905	18.2938	-0.635275	0.252044	6.33333	+		0.503757	0.417524	0	+		-0.476218	0.407797	2	+		0.662813	0.262864	4.33333	+
sp|A2BIM8|MUP18_MOUSE	Mup18	Major urinary protein 18 OS=Mus musculus GN=Mup18 PE=3 SV=1	29.783	7	0	6.08	20763	12	1	1	1	1	3	3	10.5982	9.99847	10.4455	12.1591	10.7898	10.8819	10.9778	14.5375	9.13483	11.2085	13.317	12.3147	12.9321	11.8285	12.8485	0.69347	0.518939	1	+		0.739606	0.538878	0	+		0.996465	0.36995	0			1.0426	0.38733	1	+
sp|Q9EQK5|MVP_MOUSE	Mvp	Major vault protein OS=Mus musculus GN=Mvp PE=1 SV=4	10.295	1	0	1.16	95924	51	1	1	1	1	1	1	10.5982	15.577	10.4455	11.3768	10.7898	11.8918	10.9778	11.9882	10.6487	16.3208	10.5808	11.9942	10.8596	11.0634	11.3406	0.386753	0.838209	20.5	+		-0.324052	0.435614	0			-0.587441	0.654583	11	+		-1.29825	0.454852	9.5	+
sp|O35682|MYADM_MOUSE	Myadm	Myeloid-associated differentiation marker OS=Mus musculus GN=Myadm PE=1 SV=2	130.023	1	0	17.5	35285	10	4	4	4	4	20	20	10.5982	15.7835	10.4455	10.6507	13.8445	11.6462	11.7717	11.9882	10.2684	15.6214	10.5808	10.2934	11.0333	11.0626	11.3406	-0.178435	0.926336	1	+		-1.16718	0.116367	0	+		0.443221	0.762852	0	+		-0.545524	0.739957	1	+
sp|Q7TPV4|MBB1A_MOUSE	Mybbp1a	Myb-binding protein 1A OS=Mus musculus GN=Mybbp1a PE=1 SV=2	159.207	1	0	5.43	152037	81	5	5	5	5	11	11	10.2481	12.7561	9.798	17.5915	12.3401	10.7753	12.4351	12.8767	10.2214	14.0165	10.2068	16.4138	14.3752	14.8082	17.1337	0.116185	0.962155	4	+		3.33224	0.0139111	0	+		-0.491641	0.7988	1	+		2.72441	0.219346	3	+
sp|O70468|MYPC3_MOUSE	Mybpc3	Myosin-binding protein C, cardiac-type OS=Mus musculus GN=Mybpc3 PE=1 SV=1	51.134	1	0	1.02	140632	79	1	1	1	1	9	9	10.5982	9.99847	10.4455	10.6507	12.8476	10.8819	10.9778	11.9882	9.13483	10.785	10.5808	10.2934	10.8596	11.0634	11.3406	-0.224678	0.592191	12			-0.586033	0.344629	0			1.25071	0.0425783	6		+	0.889357	0.105937	6
sp|Q9EQS3|MYCBP_MOUSE	Mycbp	C-Myc-binding protein OS=Mus musculus GN=Mycbp PE=1 SV=5	28.907	1	0	27.18	11970	7	2	2	2	2	7	7	11.445	11.1607	10.9972	10.6507	12.0716	10.8819	10.9778	11.9882	13.6993	11.5652	11.1756	10.2934	10.8596	11.0634	11.3406	0.620012	0.435087	2	+		-0.392027	0.366105	0			0.416508	0.29025	0	+		-0.595531	0.520885	2	+
sp|Q8C854|MYEF2_MOUSE	Myef2	Myelin expression factor 2 OS=Mus musculus GN=Myef2 PE=1 SV=1	73.157	1	0	6.09	63295	35	3	3	3	3	5	5	9.23046	10.675	10.4283	10.6507	11.0537	10.8819	10.9778	12.1309	14.176	10.9127	10.7881	9.78449	11.2007	11.0634	11.9153	1.16921	0.292755	4.5	+		0.132044	0.760532	0	+		1.01498	0.0651947	2.5	+		-0.0221858	0.98536	2	+
sp|Q9JK81|MYG1_MOUSE	Myg1	UPF0160 protein MYG1, mitochondrial OS=Mus musculus GN=Myg1 PE=1 SV=1	24.16	1	0	2.63	42723	28	1	1	1	1	4	4	12.0847	9.99847	10.4455	12.9835	10.7898	10.5085	10.9778	11.9882	9.76645	10.4762	10.5808	14.4682	10.8596	11.0634	14.3427	-0.055098	0.966869	42	+		1.02247	0.361411	0			-0.31193	0.699057	11.6667	+		0.765639	0.647155	30.3333	+
sp|Q61879|MYH10_MOUSE	Myh10	Myosin-10 OS=Mus musculus GN=Myh10 PE=1 SV=2	1042.03	1	0	23.08	228996	127	36	28	38	30	149	113	14.6104	17.4698	13.6218	14.0458	17.9972	15.4379	17.3563	11.8613	15.4869	16.7831	14.7908	14.8072	17.0984	14.5393	12.3446	0.530041	0.610287	9	+		-1.00241	0.636816	42.6667	+		0.726247	0.671465	19.3333	+		-0.806199	0.555138	32.3333	+
sp|Q6URW6|MYH14_MOUSE	Myh14	Myosin-14 OS=Mus musculus GN=Myh14 PE=1 SV=1	179.103	1	0	3.6	228586	128	6	2	6	2	31	6	12.224	15.3745	13.5701	10.6507	12.8037	15.2398	14.9917	13.0877	11.9895	13.1482	12.5118	14.7386	10.8596	13.0864	11.3406	0.142201	0.906996	7	+		-2.26852	0.0600486	0	+		1.07591	0.398987	2	+		-1.3348	0.200039	5	+
sp|P13541|MYH3_MOUSE	Myh3	Myosin-3 OS=Mus musculus GN=Myh3 PE=2 SV=2	920.244	1	0	12.16	223791	127	27	1	29	1	535	8	10.5982	12.0976	10.4455	10.6507	13.2195	10.8819	10.9778	11.9882	9.13483	12.4688	10.5808	10.2934	12.2346	11.0634	11.3406	-0.32851	0.692528	60.6667			-0.220661	0.768326	4			0.818878	0.265982	31.1667			0.926728	0.335284	33.5
sp|Q5SX39|MYH4_MOUSE	Myh4	Myosin-4 OS=Mus musculus GN=Myh4 PE=2 SV=1	1309.79	1	0	13.77	222859	127	31	1	34	1	612	2	10.5982	9.99847	10.4455	10.6507	10.7898	13.774	15.023	11.9882	11.267	10.785	10.5808	11.7799	10.8596	11.0634	11.3406	0.679982	0.0678579	55	+		-1.80588	0.16649	69.1667	+		2.47055	0.0405538	71.8333	+	+	-0.0153042	0.965571	52.3333	+
sp|Q02566|MYH6_MOUSE	Myh6	Myosin-6 OS=Mus musculus GN=Myh6 PE=1 SV=2	8002.53	1	1	65.63	223565	124	154	123	208	174	3234	2765	19.4815	22.3583	18.2878	19.3075	23.6114	23.749	24.9112	19.2468	18.9853	21.5014	17.9112	18.5598	22.3879	20.5881	19.7232	-0.619376	0.617034	15	+		-1.9799	0.274385	4	+		3.02083	0.0943027	10.6667	+		1.6603	0.204439	8.33333	+
sp|A2AQP0|MYH7B_MOUSE	Myh7b	Myosin-7B OS=Mus musculus GN=Myh7b PE=3 SV=1	349.038	1	0	4.33	221497	129	11	1	14	1	97	1	21.0602	15.6574	15.9415	15.0975	13.8157	14.3994	13.2969	11.9351	18.684	16.3584	15.9435	15.4375	14.0334	14.2686	12.2385	-0.333281	0.837883	0	+		0.151697	0.860803	3.5	+		-3.57734	0.0522306	2	+		-3.09236	0.0275239	1.5	+
sp|Q8VDD5|MYH9_MOUSE	Myh9	Myosin-9 OS=Mus musculus GN=Myh9 PE=1 SV=4	2349.43	1	1	43.37	226372	129	75	66	78	69	338	300	17.339	20.0456	16.034	16.9614	17.4837	18.6564	18.5811	17.0694	17.4958	19.2475	16.0024	17.7358	16.5324	15.6725	16.8146	0.025384	0.982142	128.667	+		-1.60779	0.0330009	24.1667	+	+	0.352624	0.722885	101.5	+		-1.28055	0.186503	51.3333	+
sp|P05977|MYL1_MOUSE	Myl1	Myosin light chain 1/3, skeletal muscle isoform OS=Mus musculus GN=Myl1 PE=1 SV=2	342.027	1	0	47.34	20595	12	9	8	11	10	86	62	10.5982	17.1696	12.1028	10.6507	16.1283	17.1867	14.832	11.9882	13.5587	15.9834	10.6553	10.4044	14.5643	11.2406	11.3406	0.02012	0.992447	17.5	+		-2.65194	0.161059	0	+		2.40345	0.256483	3.5	+		-0.26861	0.887879	14	+
[truncated: 971 more rows]
[truncated: 83 more columns]
