# Supplementary material for: Long non-coding RNA Neat1 and paraspeckle components are translational regulators in hypoxia
Source: eLife. 2022 Dec 22;11:e69162. doi: 10.7554/eLife.69162 (PMC9799981; doi:10.7554/eLife.69162)
Supplement: Supplementary file 8. — HL-1 cardiomyocytes were transfected with gapmer Neat1, Neat1_2, or control. Polysomes were purified on sucrose gradient as described in Star Methods. RNAs were purified from cytoplasmic extracts and from pooled polysomal fractions and analyzed on a Fluidigm deltagene PCR array from two biologicals replicates (cell culture dishs and cDNAs), each of them measured in three technical replicates (PCR reactions). mRNA levels in polysomes (polysomal RNA/ total RNA) were analyzed for each gene. Relative quantification (RQ) of mRNA level was calculated using the 2–ΔΔCT method with normalization to Gapdh mRNA and to HL-1 tranfected by gapmer control, and is shown as fold change of expression. RQ1 and RQ2 correspond to two independent experiments. To measure the fold change of repression, the mean is expressed as –1/RQ for the values <1 (yellow column). [file elife-69162-supp8.docx]

| | **A/ *Neat1* knock-down** | | |  |  |  |  |  |  |  | | --- | --- | --- | --- | --- | --- | --- | --- | --- | --- | |  | |  |  |  |  |  |  |  |  | |  |  | |  |  |  |  |  |  |  | |  | **Total mRNA** | | | **Polysome bound mRNA** | | **Fold change** | | **Fold change Mean** | | | **Gene name** | RQ 1 | | RQ 2 | RQ 1 | RQ 2 | RQ (polysomes)/ RQ (Total mRNA) 1 | RQ (polysomes)/ RQ (Total mRNA) 2 | RQ (ou -1/RQ) | SD | | *Aanat* | ND | | 87.95 | 1.58 | ND | ND | ND | ND | ND | | *Adar (Adar1)* | 1.35 | | 0.88 | 1.14 | 0.99 | 0.85 | 1.12 | -1.02 | 0.14 | | *Alox15* | ND | | 0.22 | 4.17 | 0.61 | ND | 2.75 | ND | ND | | *Ang* | 0.80 | | 1.00 | 0.50 | 0.82 | 0.63 | 0.82 | -1.38 | 0.09 | | *Apaf1* | 1.21 | | 0.93 | 1.50 | 1.17 | 1.24 | 1.25 | 1.25 | 0.01 | | *Apln* | 1.36 | | 0.99 | 1.07 | 1.23 | 0.79 | 1.24 | 1.02 | 0.22 | | *Aplnr* | 1.15 | | 0.22 | 0.78 | 0.20 | 0.68 | 0.92 | -1.25 | 0.12 | | *Bag1* | 1.19 | | 1.03 | 0.75 | 1.12 | 0.63 | 1.09 | -1.16 | 0.23 | | *Bax* | 1.27 | | 1.05 | 1.00 | 1.18 | 0.78 | 1.12 | -1.05 | 0.17 | | *Bcl2 (Bcl-2)* | 1.02 | | 0.96 | 0.56 | 0.63 | 0.55 | 0.65 | -1.66 | 0.05 | | *Bcl2L1 (Bcl-XL)* | 1.25 | | 1.09 | 1.42 | 0.94 | 1.13 | 0.86 | -1.00 | 0.14 | | *Bip(GRP78/Hspa5)* | 1.18 | | 0.64 | 0.95 | 0.92 | 0.80 | 1.45 | 1.13 | 0.33 | | *BNP (Nppb)* | 3.36 | | 0.93 | 1.45 | 1.88 | 0.43 | 2.04 | 1.23 | 0.80 | | *Casp2 (Caspase-2)* | 0.95 | | 0.42 | 1.08 | 0.82 | 1.14 | 1.94 | 1.54 | 0.40 | | *Cdk1* | 0.97 | | 0.72 | 0.78 | 0.88 | 0.80 | 1.23 | 1.01 | 0.21 | | *Cdkn1B (p27kip1)* | 0.87 | | 0.86 | 0.75 | 0.89 | 0.87 | 1.03 | -1.05 | 0.08 | | *Cdkn2A (p16INK4)* | 1.08 | | 1.01 | 0.69 | 0.90 | 0.64 | 0.89 | -1.31 | 0.13 | | *Col1A1* | 1.06 | | 0.69 | 0.95 | 0.73 | 0.90 | 1.06 | -1.02 | 0.08 | | *Col3A1* | 0.80 | | 0.54 | 1.13 | 0.55 | 1.41 | 1.01 | 1.21 | 0.20 | | *Csde1* | 1.07 | | 0.72 | 0.84 | 0.89 | 0.78 | 1.23 | 1.01 | 0.23 | | *Ctgf* | 1.02 | | 0.79 | 1.05 | 1.09 | 1.03 | 1.39 | 1.21 | 0.18 | | *Cyr61* | 1.60 | | 1.37 | 1.78 | 1.34 | 1.11 | 0.97 | 1.04 | 0.07 | | *Dazap1* | 0.97 | | 1.11 | 0.71 | 0.88 | 0.74 | 0.79 | -1.31 | 0.02 | | *Ddx17* | 1.11 | | 0.65 | 1.15 | 0.65 | 1.04 | 1.00 | 1.02 | 0.02 | | *Egr1* | 2.50 | | 1.36 | 1.90 | 1.08 | 0.76 | 0.79 | -1.29 | 0.01 | | *Eno3* | 1.12 | | 0.78 | 0.92 | 0.81 | 0.83 | 1.04 | -1.07 | 0.10 | | *Epas1* | 1.53 | | 0.84 | 0.89 | 0.94 | 0.58 | 1.12 | -1.17 | 0.27 | | *Fgf1* | 0.85 | | 0.51 | 0.81 | 0.69 | 0.95 | 1.36 | 1.16 | 0.20 | | *Fgf10* | 1.53 | | 0.78 | 1.12 | 1.20 | 0.73 | 1.53 | 1.13 | 0.40 | | *Fgf2* | ND | | 1.23 | 0.19 | 0.23 | ND | 0.19 | ND | ND | | *Fgf21* | 1.33 | | 0.93 | 0.49 | 0.44 | 0.37 | 0.47 | -2.39 | 0.05 | | *Fgf23* | ND | | ND | 2.38 | ND | ND | ND | ND | ND | | *Fgf4* | 0.23 | | 193.41 | 32.32 | 8.24 | 139.51 | 0.04 | ND | ND | | *Fgfr1* | 0.94 | | 0.51 | 0.58 | 0.48 | 0.62 | 0.94 | -1.28 | 0.16 | | *Fgfr2* | 1.10 | | 0.78 | 0.87 | 0.67 | 0.79 | 0.87 | -1.21 | 0.04 | | *Fgfr3* | 1.20 | | 0.76 | 1.07 | 1.04 | 0.89 | 1.38 | 1.14 | 0.24 | | *Fmr1 (Fmrp)* | 1.21 | | 1.07 | 0.63 | 1.02 | 0.52 | 0.95 | -1.36 | 0.22 | | *Fn1 (Fibronectine)* | 0.88 | | 0.73 | 1.03 | 0.69 | 1.18 | 0.95 | 1.06 | 0.12 | | *Fus* | 1.04 | | 0.66 | 0.99 | 0.71 | 0.96 | 1.07 | 1.01 | 0.06 | | *Gapdh* | 1.00 | | 1.00 | 1.00 | 1.00 | 1.00 | 1.00 | -1.00 | 0.00 | | *Gusb* | 1.11 | | 0.72 | 1.19 | 1.00 | 1.07 | 1.39 | 1.23 | 0.16 | | *Hgf* | ND | | ND | 0.37 | ND | ND | ND | ND | ND | | *Hif1A* | 0.91 | | 0.73 | 0.98 | 0.79 | 1.08 | 1.08 | 1.08 | 0.00 | | *Hnrnpa1* | 1.01 | | 0.67 | 0.83 | 0.69 | 0.83 | 1.02 | -1.09 | 0.09 | | *Hnrnph3* | 1.10 | | 1.25 | 0.55 | 0.99 | 0.50 | 0.79 | -1.55 | 0.14 | | *Hnrnpk* | 0.99 | | 0.90 | 0.91 | 0.88 | 0.92 | 0.98 | -1.06 | 0.03 | | *Hnrnpm* | 1.02 | | 1.03 | 0.67 | 0.97 | 0.66 | 0.93 | -1.25 | 0.14 | | *Hnrnpr* | 1.16 | | 0.90 | 0.69 | 1.02 | 0.59 | 1.13 | -1.16 | 0.27 | | *Hoxa9* | 1.08 | | 2.35 | 9.51 | 1.41 | 8.83 | 0.60 | ND | ND | | *HuR (Elavl1)* | 0.88 | | 0.76 | 1.06 | 0.83 | 1.20 | 1.09 | 1.15 | 0.05 | | *Igf1* | 1.11 | | 0.92 | 0.74 | 0.69 | 0.67 | 0.75 | -1.41 | 0.04 | | *Igf1R* | 0.92 | | 0.87 | 0.90 | 0.68 | 0.98 | 0.79 | -1.13 | 0.10 | | *Igf2R* | 0.93 | | 0.74 | 1.08 | 0.88 | 1.16 | 1.19 | 1.17 | 0.02 | | *Irf2* | 1.18 | | 1.05 | 0.95 | 0.95 | 0.80 | 0.91 | -1.17 | 0.05 | | *Lamb1* | 0.74 | | 1.03 | 0.44 | 0.77 | 0.60 | 0.75 | -1.49 | 0.07 | | *Lef1* | ND | | ND | 0.41 | 0.55 | ND | ND | ND | ND | | *Mmp2* | 1.01 | | 0.92 | 1.84 | 0.86 | 1.83 | 0.94 | 1.39 | 0.44 | | *Mycbp* | 0.91 | | 0.89 | 0.69 | 0.99 | 0.75 | 1.11 | -1.07 | 0.18 | | *Mycl* | 1.93 | | 1.84 | 2.39 | 1.52 | 1.24 | 0.83 | 1.03 | 0.21 | | *Ncl* | 1.12 | | 1.10 | 0.49 | 0.93 | 0.44 | 0.84 | -1.56 | 0.20 | | *Neat1* | 0.54 | | 0.81 | 0.43 | 0.56 | 0.80 | 0.68 | -1.35 | 0.06 | | *Neat1-2* | 0.61 | | 0.50 | 0.54 | 0.37 | 0.89 | 0.75 | -1.22 | 0.07 | | *Nfil3* | 0.80 | | 1.08 | 1.16 | 0.86 | 1.45 | 0.80 | 1.12 | 0.33 | | *Nkrf (NRF)* | 0.97 | | 1.25 | 0.84 | 1.08 | 0.87 | 0.86 | -1.15 | 0.01 | | *Nono* | 1.21 | | 1.26 | 0.87 | 0.92 | 0.72 | 0.73 | -1.38 | 0.01 | | *Nr1D1 (rev-erb-a)* | 1.23 | | 1.09 | 0.86 | 1.04 | 0.70 | 0.95 | -1.21 | 0.13 | | *Pdgfa* | 1.12 | | 1.03 | 0.76 | 1.03 | 0.68 | 1.00 | -1.19 | 0.16 | | *Pdgfb* | 1.07 | | 0.89 | 1.18 | 1.07 | 1.11 | 1.20 | 1.15 | 0.05 | | *Per1 (Period-1)* | 1.18 | | 1.13 | 1.21 | 1.03 | 1.03 | 0.92 | -1.03 | 0.05 | | *Pfkm (Pfk1)* | 0.81 | | 0.63 | 0.97 | 0.57 | 1.20 | 0.90 | 1.05 | 0.15 | | *Pgf (Plgf))* | 1.02 | | 1.00 | 1.10 | 1.77 | 1.09 | 1.76 | 1.42 | 0.34 | | *Prox1* | 0.85 | | 0.94 | 0.88 | 0.97 | 1.04 | 1.03 | 1.03 | 0.01 | | *Pspc1* | 1.09 | | 1.05 | 0.65 | 0.93 | 0.59 | 0.89 | -1.35 | 0.15 | | *Rbm14* | 1.11 | | 0.94 | 1.03 | 0.87 | 0.93 | 0.93 | -1.07 | 0.00 | | *Rpl10A* | 0.91 | | 0.82 | 1.26 | 1.09 | 1.39 | 1.33 | 1.36 | 0.03 | | *Rps2* | 1.12 | | 0.71 | 1.23 | 0.86 | 1.10 | 1.22 | 1.16 | 0.06 | | *Rps25* | 1.12 | | 1.09 | 0.87 | 0.99 | 0.78 | 0.91 | -1.19 | 0.07 | | *Rrbp1* | 0.94 | | 0.68 | 0.58 | 0.55 | 0.62 | 0.82 | -1.39 | 0.10 | | *Serpine1 (PAI1)* | 1.03 | | 0.62 | 0.88 | 0.72 | 0.86 | 1.15 | 1.00 | 0.15 | | *Setd7 (Set7)* | 1.23 | | 0.90 | 1.47 | 0.83 | 1.20 | 0.92 | 1.06 | 0.14 | | *Sfpq* | 0.99 | | 1.07 | 0.71 | 0.89 | 0.72 | 0.83 | -1.29 | 0.05 | | *Shmt1* | 1.14 | | 0.81 | 0.98 | 0.86 | 0.86 | 1.06 | -1.04 | 0.10 | | *Slc7A1 (Cat-1)* | 1.07 | | 0.66 | 1.06 | 0.79 | 0.99 | 1.21 | 1.10 | 0.11 | | *Srebf1 (Srebp1)* | 0.75 | | 0.70 | 0.84 | 0.78 | 1.12 | 1.11 | 1.12 | 0.00 | | *Sstr2 (Sst2)* | 1.55 | | 1.51 | 3.86 | 1.94 | 2.49 | 1.28 | 1.89 | 0.60 | | *Thbd (Thrombomodulin)* | 1.85 | | 0.91 | 1.05 | 0.96 | 0.57 | 1.06 | -1.23 | 0.24 | | *Trp53* | 1.28 | | 1.14 | 1.08 | 1.09 | 0.84 | 0.95 | -1.11 | 0.06 | | *Txnip* | 1.13 | | 0.74 | 1.22 | 0.86 | 1.07 | 1.15 | 1.11 | 0.04 | | *Utrn (Utrophin)* | 1.04 | | 0.83 | 0.59 | 0.63 | 0.57 | 0.76 | -1.50 | 0.09 | | *Vash1* | 1.06 | | 0.68 | 1.13 | 0.96 | 1.07 | 1.41 | 1.24 | 0.17 | | *Vegfa* | 0.87 | | 0.95 | 0.83 | 1.02 | 0.96 | 1.07 | 1.01 | 0.06 | | *Vegfb* | 0.93 | | 0.90 | 0.75 | 0.90 | 0.81 | 1.00 | -1.11 | 0.09 | | *Vegfc* | ND | | ND | 1.16 | ND | ND | ND | ND | ND | | *Vegfd (Figf)* | 0.84 | | 0.66 | 0.68 | 0.99 | 0.81 | 1.50 | 1.15 | 0.34 | | *Xiap* | 0.97 | | 0.79 | 0.97 | 0.96 | 1.00 | 1.20 | 1.10 | 0.10 | |
| --- | --- | --- | --- | --- | --- | --- | --- | --- | --- | --- | --- | --- | --- | --- | --- | --- | --- | --- | --- | --- | --- | --- | --- | --- | --- | --- | --- | --- | --- | --- | --- | --- | --- | --- | --- | --- | --- | --- | --- | --- | --- | --- | --- | --- | --- | --- | --- | --- | --- | --- | --- | --- | --- | --- | --- | --- | --- | --- | --- | --- | --- | --- | --- | --- | --- | --- | --- | --- | --- | --- | --- | --- | --- | --- | --- | --- | --- | --- | --- | --- | --- | --- | --- | --- | --- | --- | --- | --- | --- | --- | --- | --- | --- | --- | --- | --- | --- | --- | --- | --- | --- | --- | --- | --- | --- | --- | --- | --- | --- | --- | --- | --- | --- | --- | --- | --- | --- | --- | --- | --- | --- | --- | --- | --- | --- | --- | --- | --- | --- | --- | --- | --- | --- | --- | --- | --- | --- | --- | --- | --- | --- | --- | --- | --- | --- | --- | --- | --- | --- | --- | --- | --- | --- | --- | --- | --- | --- | --- | --- | --- | --- | --- | --- | --- | --- | --- | --- | --- | --- | --- | --- | --- | --- | --- | --- | --- | --- | --- | --- | --- | --- | --- | --- | --- | --- | --- | --- | --- | --- | --- | --- | --- | --- | --- | --- | --- | --- | --- | --- | --- | --- | --- | --- | --- | --- | --- | --- | --- | --- | --- | --- | --- | --- | --- | --- | --- | --- | --- | --- | --- | --- | --- | --- | --- | --- | --- | --- | --- | --- | --- | --- | --- | --- | --- | --- | --- | --- | --- | --- | --- | --- | --- | --- | --- | --- | --- | --- | --- | --- | --- | --- | --- | --- | --- | --- | --- | --- | --- | --- | --- | --- | --- | --- | --- | --- | --- | --- | --- | --- | --- | --- | --- | --- | --- | --- | --- | --- | --- | --- | --- | --- | --- | --- | --- | --- | --- | --- | --- | --- | --- | --- | --- | --- | --- | --- | --- | --- | --- | --- | --- | --- | --- | --- | --- | --- | --- | --- | --- | --- | --- | --- | --- | --- | --- | --- | --- | --- | --- | --- | --- | --- | --- | --- | --- | --- | --- | --- | --- | --- | --- | --- | --- | --- | --- | --- | --- | --- | --- | --- | --- | --- | --- | --- | --- | --- | --- | --- | --- | --- | --- | --- | --- | --- | --- | --- | --- | --- | --- | --- | --- | --- | --- | --- | --- | --- | --- | --- | --- | --- | --- | --- | --- | --- | --- | --- | --- | --- | --- | --- | --- | --- | --- | --- | --- | --- | --- | --- | --- | --- | --- | --- | --- | --- | --- | --- | --- | --- | --- | --- | --- | --- | --- | --- | --- | --- | --- | --- | --- | --- | --- | --- | --- | --- | --- | --- | --- | --- | --- | --- | --- | --- | --- | --- | --- | --- | --- | --- | --- | --- | --- | --- | --- | --- | --- | --- | --- | --- | --- | --- | --- | --- | --- | --- | --- | --- | --- | --- | --- | --- | --- | --- | --- | --- | --- | --- | --- | --- | --- | --- | --- | --- | --- | --- | --- | --- | --- | --- | --- | --- | --- | --- | --- | --- | --- | --- | --- | --- | --- | --- | --- | --- | --- | --- | --- | --- | --- | --- | --- | --- | --- | --- | --- | --- | --- | --- | --- | --- | --- | --- | --- | --- | --- | --- | --- | --- | --- | --- | --- | --- | --- | --- | --- | --- | --- | --- | --- | --- | --- | --- | --- | --- | --- | --- | --- | --- | --- | --- | --- | --- | --- | --- | --- | --- | --- | --- | --- | --- | --- | --- | --- | --- | --- | --- | --- | --- | --- | --- | --- | --- | --- | --- | --- | --- | --- | --- | --- | --- | --- | --- | --- | --- | --- | --- | --- | --- | --- | --- | --- | --- | --- | --- | --- | --- | --- | --- | --- | --- | --- | --- | --- | --- | --- | --- | --- | --- | --- | --- | --- | --- | --- | --- | --- | --- | --- | --- | --- | --- | --- | --- | --- | --- | --- | --- | --- | --- | --- | --- | --- | --- | --- | --- | --- | --- | --- | --- | --- | --- | --- | --- | --- | --- | --- | --- | --- | --- | --- | --- | --- | --- | --- | --- | --- | --- | --- | --- | --- | --- | --- | --- | --- | --- | --- | --- | --- | --- | --- | --- | --- | --- | --- | --- | --- | --- | --- | --- | --- | --- | --- | --- | --- | --- | --- | --- | --- | --- | --- | --- | --- | --- | --- | --- | --- | --- | --- | --- | --- | --- | --- | --- | --- | --- | --- | --- | --- | --- | --- | --- | --- | --- | --- | --- | --- | --- | --- | --- | --- | --- | --- | --- | --- | --- | --- | --- | --- | --- | --- | --- | --- | --- | --- | --- | --- | --- | --- | --- | --- | --- | --- | --- | --- | --- | --- | --- | --- | --- | --- | --- | --- | --- | --- | --- | --- | --- | --- | --- | --- | --- | --- | --- | --- | --- | --- | --- | --- | --- | --- | --- | --- | --- | --- | --- | --- | --- | --- | --- | --- | --- | --- | --- | --- | --- | --- | --- | --- | --- | --- | --- | --- | --- | --- | --- | --- | --- | --- | --- | --- | --- | --- | --- | --- | --- | --- | --- | --- | --- | --- | --- | --- | --- | --- | --- | --- | --- | --- | --- | --- | --- | --- | --- | --- | --- | --- | --- | --- | --- | --- | --- | --- | --- | --- | --- | --- | --- | --- | --- | --- | --- | --- | --- | --- | --- | --- | --- | --- | --- | --- | --- | --- | --- | --- | --- | --- | --- | --- | --- | --- | --- | --- | --- | --- | --- | --- | --- | --- | --- | --- | --- | --- | --- | --- | --- | --- | --- | --- | --- | --- | --- | --- | --- | --- | --- | --- | --- | --- | --- | --- | --- | --- | --- | --- | --- | --- | --- | --- | --- | --- | --- | --- | --- | --- | --- | --- | --- | --- | --- | --- | --- | --- | --- | --- | --- | --- | --- | --- | --- | --- | --- | --- | --- | --- | --- | --- | --- | --- | --- | --- | --- | --- | --- | --- | --- | --- | --- | --- | --- | --- | --- | --- | --- | --- | --- | --- | --- | --- | --- | --- | --- | --- | --- | --- | --- | --- | --- | --- | --- | --- | --- | --- | --- | --- | --- | --- | --- | --- | --- | --- | --- | --- | --- | --- | --- | --- | --- | --- | --- | --- | --- | --- | --- | --- | --- | --- | --- | --- | --- | --- | --- | --- | --- | --- | --- | --- | --- | --- | --- | --- | --- | --- | --- | --- | --- | --- | --- | --- | --- | --- | --- | --- | --- | --- | --- | --- | --- | --- | --- | --- | --- | --- | --- | --- |

| **B/ *Neat1_2* knock-down** |  |  |  |  |  |  |  |
| --- | --- | --- | --- | --- | --- | --- | --- |

| |  | **Total mRNA** | | **Polysome bound mRNA** | | **Fold change** | | **Fold change mean** | | | --- | --- | --- | --- | --- | --- | --- | --- | --- | | **Gene name** | RQ 1 | RQ 2 | RQ 1 | RQ 2 | RQ polysomes/ RQ Total mRNA 1 | RQ polysomes/ RQ Total mRNA 2 | RQ (or -1/RQ) | SD | | *Aanat* | ND | 306.15 | ND | 0.73 | ND | 0.00 | ND | ND | | *Adar (Adar1)* | 1.10 | 1.34 | 0.88 | 1.16 | 0.80 | 0.87 | -1.20 | 0.03 | | *Alox15* | 0.45 | 2.70 | 1.98 | 0.36 | 4.37 | 0.13 | ND | ND | | *Ang* | 0.83 | 1.49 | 0.86 | 1.09 | 1.04 | 0.73 | -1.13 | 0.16 | | *Apaf1* | 1.04 | 1.16 | 0.93 | 1.04 | 0.90 | 0.90 | -1.11 | 0.00 | | *Apln* | 1.23 | 1.53 | 0.76 | 1.54 | 0.62 | 1.00 | -1.23 | 0.19 | | *Aplnr* | ND | 3.03 | 0.97 | 1.74 | ND | 0.57 | ND | ND | | *Bag1* | 1.28 | 1.38 | 1.27 | 1.04 | 0.99 | 0.76 | -1.15 | 0.12 | | *Bax* | 1.15 | 1.00 | 0.79 | 1.00 | 0.69 | 1.00 | -1.18 | 0.16 | | *Bcl2 (Bcl-2)* | 1.04 | 1.38 | 0.91 | 1.16 | 0.88 | 0.84 | -1.16 | 0.02 | | *Bcl2L1 (Bcl-XL)* | 1.19 | 1.20 | 0.96 | 1.12 | 0.81 | 0.93 | -1.15 | 0.06 | | *Bip (GRP78/Hspa5)* | 0.78 | 1.16 | 0.67 | 0.92 | 0.87 | 0.79 | -1.21 | 0.04 | | *BNP (Nppb)* | 0.83 | 0.60 | 0.61 | 0.88 | 0.74 | 1.48 | 1.11 | 0.37 | | *Casp2 (Caspase-2)* | 1.02 | 1.30 | 0.99 | 0.99 | 0.97 | 0.76 | -1.15 | 0.10 | | *Cdk1* | 1.10 | 1.19 | 1.00 | 1.08 | 0.91 | 0.91 | -1.10 | 0.00 | | *Col1A1* | 1.52 | 1.35 | 0.76 | 1.00 | 0.50 | 0.74 | -1.61 | 0.12 | | *Col3A1* | 1.47 | 1.08 | 0.38 | 1.05 | 0.25 | 0.98 | -1.62 | 0.36 | | *Csde1* | 1.21 | 1.48 | 1.18 | 0.99 | 0.98 | 0.67 | -1.22 | 0.15 | | *Ctgf* | 1.09 | 1.47 | 0.74 | 0.99 | 0.68 | 0.67 | -1.48 | 0.00 | | *Cyr61* | 1.08 | 1.00 | 0.73 | 1.02 | 0.68 | 1.03 | -1.17 | 0.17 | | *Dazap1* | 1.15 | 1.35 | 1.05 | 0.99 | 0.91 | 0.73 | -1.22 | 0.09 | | *Ddx17* | 1.12 | 1.22 | 0.85 | 1.17 | 0.76 | 0.95 | -1.17 | 0.10 | | *Egr1* | 0.96 | 1.16 | 0.80 | 0.90 | 0.83 | 0.78 | -1.24 | 0.03 | | *Eno3* | 1.03 | 1.36 | 0.93 | 1.08 | 0.90 | 0.80 | -1.18 | 0.05 | | *Epas1* | 1.17 | 1.58 | 0.95 | 1.02 | 0.82 | 0.64 | -1.37 | 0.09 | | *Fgf1* | 1.09 | 1.45 | 1.00 | 0.95 | 0.92 | 0.65 | -1.27 | 0.13 | | *Fgf10* | 0.90 | 1.26 | 0.25 | 2.94 | 0.27 | 2.33 | ND | ND | | *Fgf2* | 4.34 | 2.07 | 0.85 | 2.41 | 0.20 | 1.16 | ND | ND | | *Fgf21* | 0.82 | 0.97 | 0.67 | 1.01 | 0.82 | 1.03 | -1.08 | 0.10 | | *Fgf23* | ND | ND | ND | 0.86 | ND | ND | ND | ND | | *Fgf4* | 10.86 | 1.25 | 1.93 | 1.48 | 0.18 | 1.18 | -1.47 | 0.50 | | *Fgfr1* | 1.19 | 1.86 | 0.66 | 1.04 | 0.56 | 0.56 | -1.79 | 0.00 | | *Fgfr2* | 0.70 | 0.79 | 1.13 | 1.44 | 1.61 | 1.83 | 1.72 | 0.11 | | *Fgfr3* | 0.96 | 1.39 | 0.77 | 1.06 | 0.80 | 0.77 | -1.28 | 0.02 | | *Fmr1 (Fmrp)* | 1.30 | 1.67 | 1.17 | 1.31 | 0.90 | 0.78 | -1.19 | 0.06 | | *Fn1 (Fibronectine)* | 0.96 | 1.41 | 0.86 | 1.46 | 0.89 | 1.04 | -1.04 | 0.07 | | *Fus* | 0.99 | 1.26 | 0.89 | 1.09 | 0.90 | 0.86 | -1.14 | 0.02 | | *Gapdh* | 1.00 | 1.00 | 1.00 | 1.00 | 1.00 | 1.00 | -1.00 | 0.00 | | *Gusb* | 1.09 | 1.26 | 0.88 | 1.13 | 0.81 | 0.89 | -1.17 | 0.04 | | *Hgf* | ND | ND | ND | ND | ND | ND | ND | ND | | *Hif1A* | 0.99 | 1.18 | 1.01 | 1.03 | 1.02 | 0.87 | -1.06 | 0.08 | | *Hnrnpa1* | 1.10 | 1.14 | 0.96 | 1.07 | 0.87 | 0.94 | -1.10 | 0.04 | | *Hnrnph3* | 1.01 | 1.59 | 0.85 | 1.14 | 0.85 | 0.72 | -1.28 | 0.06 | | *Hnrnpk* | 1.11 | 1.03 | 0.94 | 1.06 | 0.85 | 1.02 | -1.07 | 0.09 | | *Hnrnpm* | 1.04 | 1.50 | 1.02 | 1.21 | 0.98 | 0.81 | -1.12 | 0.08 | | *Hnrnpr* | 1.22 | 1.44 | 1.11 | 1.16 | 0.91 | 0.81 | -1.16 | 0.05 | | *Hoxa9* | 0.65 | 0.60 | 0.52 | 0.19 | 0.80 | 0.31 | -1.80 | 0.24 | | *HuR (Elavl1)* | 1.04 | 1.35 | 0.97 | 0.99 | 0.93 | 0.73 | -1.20 | 0.10 | | *Igf1* | 1.98 | 2.38 | 0.54 | 1.10 | 0.27 | 0.46 | -2.72 | 0.10 | | *Igf1R* | 0.83 | 1.28 | 0.67 | 0.97 | 0.81 | 0.76 | -1.27 | 0.02 | | *Igf2R* | 0.88 | 1.43 | 0.88 | 1.11 | 1.00 | 0.78 | -1.13 | 0.11 | | *Irf2* | 1.20 | 1.21 | 1.08 | 1.04 | 0.90 | 0.86 | -1.14 | 0.02 | | *Lamb1* | 1.22 | 1.58 | 1.25 | 1.23 | 1.03 | 0.77 | -1.11 | 0.13 | | *Lef1* | ND | ND | 2.27 | 2.18 | ND | ND | ND | ND | | *Mmp2* | 0.84 | 2.21 | 0.81 | 0.97 | 0.96 | 0.44 | -1.42 | 0.26 | | *Mycbp* | 1.33 | 1.22 | 0.87 | 1.03 | 0.65 | 0.85 | -1.33 | 0.10 | | *Mycl* | 1.48 | 1.02 | 0.92 | 0.95 | 0.62 | 0.93 | -1.29 | 0.16 | | *Ncl* | 1.18 | 1.63 | 0.99 | 1.01 | 0.84 | 0.62 | -1.37 | 0.11 | | *Neat1* | 0.96 | 1.30 | 0.54 | 0.87 | 0.57 | 0.67 | -1.62 | 0.05 | | *Neat1-2* | 0.37 | 0.78 | 0.41 | 0.59 | 1.09 | 0.75 | -1.08 | 0.17 | | *Nfil3* | 1.47 | 1.35 | 1.28 | 1.10 | 0.87 | 0.82 | -1.18 | 0.03 | | *Nkrf (NRF)* | 1.32 | 1.85 | 1.13 | 1.14 | 0.85 | 0.62 | -1.36 | 0.12 | | *Nono* | 1.27 | 1.49 | 1.06 | 1.21 | 0.84 | 0.81 | -1.22 | 0.01 | | *Nr1D1 (rev-erb-a)* | 1.04 | 1.18 | 0.87 | 1.03 | 0.83 | 0.87 | -1.17 | 0.02 | | *p16INK4 (Cdkn2A)* | 1.07 | 0.98 | 0.83 | 1.31 | 0.78 | 1.33 | 1.06 | 0.28 | | *p27kip1 (Cdkn1B)* | 1.17 | 1.39 | 0.99 | 1.06 | 0.85 | 0.77 | -1.24 | 0.04 | | *Pdgfa* | 1.06 | 1.32 | 0.85 | 1.15 | 0.80 | 0.87 | -1.20 | 0.04 | | *Pdgfb* | 1.46 | 1.16 | 0.86 | 1.20 | 0.59 | 1.03 | -1.23 | 0.22 | | *Per1 (Period-1)* | 1.17 | 1.49 | 0.99 | 1.04 | 0.84 | 0.70 | -1.30 | 0.07 | | *Pfkm (Pfk1)* | 0.96 | 1.18 | 0.89 | 1.02 | 0.92 | 0.86 | -1.12 | 0.03 | | *Pgf (Plgf)* | 1.19 | 1.09 | 1.32 | 1.43 | 1.11 | 1.31 | -0.83 | 0.10 | | *Prox1* | 1.26 | 1.68 | 1.23 | 1.25 | 0.98 | 0.74 | -1.16 | 0.12 | | *Pspc1* | 1.07 | 1.17 | 0.97 | 1.13 | 0.91 | 0.97 | -1.07 | 0.03 | | *Rbm14* | 1.12 | 1.44 | 0.91 | 1.11 | 0.82 | 0.77 | -1.26 | 0.02 | | *Rpl10A* | 0.91 | 0.88 | 0.98 | 1.04 | 1.07 | 1.18 | 1.12 | 0.06 | | *Rps2* | 0.94 | 1.14 | 0.86 | 0.96 | 0.92 | 0.84 | -1.14 | 0.04 | | *Rps25* | 0.69 | 1.10 | 0.93 | 0.88 | 1.34 | 0.80 | 1.07 | 0.27 | | *Rrbp1* | 0.90 | 1.11 | 0.65 | 1.13 | 0.72 | 1.02 | -1.15 | 0.15 | | *Serpine1 (PAI1)* | 0.74 | 1.51 | 0.85 | 1.07 | 1.15 | 0.71 | -1.08 | 0.22 | | *Setd7 (Set7)* | 1.19 | 1.36 | 1.02 | 0.99 | 0.86 | 0.73 | -1.26 | 0.06 | | *Sfpq* | 1.13 | 1.90 | 1.00 | 1.30 | 0.88 | 0.69 | -1.27 | 0.10 | | *Shmt1* | 1.14 | 1.39 | 0.99 | 1.19 | 0.87 | 0.86 | -1.15 | 0.00 | | *Slc7A1 (Cat-1)* | 0.87 | 1.49 | 0.74 | 1.02 | 0.85 | 0.68 | -1.30 | 0.08 | | *Srebf1 (Srebp1)* | 1.00 | 1.59 | 0.64 | 1.11 | 0.64 | 0.70 | -1.49 | 0.03 | | *Sstr2 (Sst2)* | 0.65 | 0.98 | 0.87 | 1.12 | 1.34 | 1.14 | 1.24 | 0.10 | | *Thbd (Thrombomodulin)* | 1.05 | 0.74 | 0.51 | 0.51 | 0.48 | 0.69 | -1.71 | 0.10 | | *Trp53* | 1.14 | 1.25 | 0.95 | 0.98 | 0.83 | 0.79 | -1.24 | 0.02 | | *Txnip* | 1.17 | 1.29 | 1.02 | 0.99 | 0.87 | 0.77 | -1.22 | 0.05 | | *Utrn (Utrophin)* | 0.93 | 1.59 | 0.99 | 1.10 | 1.07 | 0.69 | -1.14 | 0.19 | | *Vash1* | 1.41 | 1.82 | 1.05 | 1.02 | 0.74 | 0.56 | -1.54 | 0.09 | | *Vegfa* | 1.02 | 1.64 | 0.88 | 1.01 | 0.86 | 0.62 | -1.35 | 0.12 | | *Vegfb* | 1.40 | 1.58 | 1.02 | 1.06 | 0.73 | 0.67 | -1.43 | 0.03 | | *Vegfc* | ND | ND | 1.20 | ND | ND | ND | ND | ND | | *Vegfd (Figf)* | 1.23 | 1.13 | 1.06 | 1.04 | 0.86 | 0.93 | -1.12 | 0.03 | | *Xiap* | 1.44 | 1.45 | 1.07 | 1.10 | 0.74 | 0.76 | -1.33 | 0.01 | |
| --- | --- | --- | --- | --- | --- | --- | --- | --- | --- | --- | --- | --- | --- | --- | --- | --- | --- | --- | --- | --- | --- | --- | --- | --- | --- | --- | --- | --- | --- | --- | --- | --- | --- | --- | --- | --- | --- | --- | --- | --- | --- | --- | --- | --- | --- | --- | --- | --- | --- | --- | --- | --- | --- | --- | --- | --- | --- | --- | --- | --- | --- | --- | --- | --- | --- | --- | --- | --- | --- | --- | --- | --- | --- | --- | --- | --- | --- | --- | --- | --- | --- | --- | --- | --- | --- | --- | --- | --- | --- | --- | --- | --- | --- | --- | --- | --- | --- | --- | --- | --- | --- | --- | --- | --- | --- | --- | --- | --- | --- | --- | --- | --- | --- | --- | --- | --- | --- | --- | --- | --- | --- | --- | --- | --- | --- | --- | --- | --- | --- | --- | --- | --- | --- | --- | --- | --- | --- | --- | --- | --- | --- | --- | --- | --- | --- | --- | --- | --- | --- | --- | --- | --- | --- | --- | --- | --- | --- | --- | --- | --- | --- | --- | --- | --- | --- | --- | --- | --- | --- | --- | --- | --- | --- | --- | --- | --- | --- | --- | --- | --- | --- | --- | --- | --- | --- | --- | --- | --- | --- | --- | --- | --- | --- | --- | --- | --- | --- | --- | --- | --- | --- | --- | --- | --- | --- | --- | --- | --- | --- | --- | --- | --- | --- | --- | --- | --- | --- | --- | --- | --- | --- | --- | --- | --- | --- | --- | --- | --- | --- | --- | --- | --- | --- | --- | --- | --- | --- | --- | --- | --- | --- | --- | --- | --- | --- | --- | --- | --- | --- | --- | --- | --- | --- | --- | --- | --- | --- | --- | --- | --- | --- | --- | --- | --- | --- | --- | --- | --- | --- | --- | --- | --- | --- | --- | --- | --- | --- | --- | --- | --- | --- | --- | --- | --- | --- | --- | --- | --- | --- | --- | --- | --- | --- | --- | --- | --- | --- | --- | --- | --- | --- | --- | --- | --- | --- | --- | --- | --- | --- | --- | --- | --- | --- | --- | --- | --- | --- | --- | --- | --- | --- | --- | --- | --- | --- | --- | --- | --- | --- | --- | --- | --- | --- | --- | --- | --- | --- | --- | --- | --- | --- | --- | --- | --- | --- | --- | --- | --- | --- | --- | --- | --- | --- | --- | --- | --- | --- | --- | --- | --- | --- | --- | --- | --- | --- | --- | --- | --- | --- | --- | --- | --- | --- | --- | --- | --- | --- | --- | --- | --- | --- | --- | --- | --- | --- | --- | --- | --- | --- | --- | --- | --- | --- | --- | --- | --- | --- | --- | --- | --- | --- | --- | --- | --- | --- | --- | --- | --- | --- | --- | --- | --- | --- | --- | --- | --- | --- | --- | --- | --- | --- | --- | --- | --- | --- | --- | --- | --- | --- | --- | --- | --- | --- | --- | --- | --- | --- | --- | --- | --- | --- | --- | --- | --- | --- | --- | --- | --- | --- | --- | --- | --- | --- | --- | --- | --- | --- | --- | --- | --- | --- | --- | --- | --- | --- | --- | --- | --- | --- | --- | --- | --- | --- | --- | --- | --- | --- | --- | --- | --- | --- | --- | --- | --- | --- | --- | --- | --- | --- | --- | --- | --- | --- | --- | --- | --- | --- | --- | --- | --- | --- | --- | --- | --- | --- | --- | --- | --- | --- | --- | --- | --- | --- | --- | --- | --- | --- | --- | --- | --- | --- | --- | --- | --- | --- | --- | --- | --- | --- | --- | --- | --- | --- | --- | --- | --- | --- | --- | --- | --- | --- | --- | --- | --- | --- | --- | --- | --- | --- | --- | --- | --- | --- | --- | --- | --- | --- | --- | --- | --- | --- | --- | --- | --- | --- | --- | --- | --- | --- | --- | --- | --- | --- | --- | --- | --- | --- | --- | --- | --- | --- | --- | --- | --- | --- | --- | --- | --- | --- | --- | --- | --- | --- | --- | --- | --- | --- | --- | --- | --- | --- | --- | --- | --- | --- | --- | --- | --- | --- | --- | --- | --- | --- | --- | --- | --- | --- | --- | --- | --- | --- | --- | --- | --- | --- | --- | --- | --- | --- | --- | --- | --- | --- | --- | --- | --- | --- | --- | --- | --- | --- | --- | --- | --- | --- | --- | --- | --- | --- | --- | --- | --- | --- | --- | --- | --- | --- | --- | --- | --- | --- | --- | --- | --- | --- | --- | --- | --- | --- | --- | --- | --- | --- | --- | --- | --- | --- | --- | --- | --- | --- | --- | --- | --- | --- | --- | --- | --- | --- | --- | --- | --- | --- | --- | --- | --- | --- | --- | --- | --- | --- | --- | --- | --- | --- | --- | --- | --- | --- | --- | --- | --- | --- | --- | --- | --- | --- | --- | --- | --- | --- | --- | --- | --- | --- | --- | --- | --- | --- | --- | --- | --- | --- | --- | --- | --- | --- | --- | --- | --- | --- | --- | --- | --- | --- | --- | --- | --- | --- | --- | --- | --- | --- | --- | --- | --- | --- | --- | --- | --- | --- | --- | --- | --- | --- | --- | --- | --- | --- | --- | --- | --- | --- | --- | --- | --- | --- | --- | --- | --- | --- | --- | --- | --- | --- | --- | --- | --- | --- | --- | --- | --- | --- | --- | --- | --- | --- | --- | --- | --- | --- | --- | --- | --- | --- | --- | --- | --- | --- | --- | --- | --- | --- | --- | --- | --- | --- | --- | --- | --- | --- | --- | --- | --- | --- | --- | --- | --- | --- | --- | --- | --- | --- | --- | --- | --- | --- | --- | --- | --- | --- | --- | --- | --- | --- | --- | --- | --- | --- | --- | --- | --- | --- | --- | --- | --- | --- | --- | --- | --- | --- | --- | --- | --- | --- | --- | --- | --- | --- | --- | --- | --- | --- |
